# Supplementary material for: A Proposal for Long-Term Missions of Small Lunar Rovers Using an MLI Curtain System
Source: Hindawi journal article supplement (doi:10.1155/2019/7248515), 2019-07-02
Supplement: f1 [file 7248515.f1.xlsx]

## Sheet: Figure3-a
Time, s		Longitude	Latitude 0	29.5139	Test
74629620	0	0	387.862		Longitude	Reference
74630220	0.00694444	0.0846581	387.873		0	393.3
74630820	0.0138889	0.169316	387.865		15	389
74631420	0.0208333	0.253974	387.849		30	373.8
74632020	0.0277778	0.338632	387.829		45	352.1
74632620	0.0347222	0.42329	387.807		60	319.5
74633220	0.0416667	0.507948	387.785		75	268.1
74633820	0.0486111	0.592607	387.761		90	164.5
74634420	0.0555556	0.677265	387.738		105	119.6
74635020	0.0625	0.761923	387.714		120	113.1
74635620	0.0694444	0.846581	387.691		135	110
74636220	0.0763889	0.931239	387.667		150	107.3
74636820	0.0833333	1.0159	387.644		165	105.2
74637420	0.0902778	1.10055	387.62		180	103
74638020	0.0972222	1.18521	387.596		195	101.5
74638620	0.104167	1.26987	387.573		210	100.1
74639220	0.111111	1.35453	387.549		225	99
74639820	0.118056	1.43919	387.525		240	97.2
74640420	0.125	1.52385	387.502		255	97.2
74641020	0.131944	1.6085	387.478		270	134.1
74641620	0.138889	1.69316	387.454		285	265.9
74642220	0.145833	1.77782	387.431		300	318
74642820	0.152778	1.86248	387.407		315	351.4
74643420	0.159722	1.94714	387.383		330	372.3
74644020	0.166667	2.03179	387.36		345	387.6
74644620	0.173611	2.11645	387.336		360	393.3
74645220	0.180556	2.20111	387.312
74645820	0.1875	2.28577	387.288
74646420	0.194444	2.37043	387.265
74647020	0.201389	2.45508	387.241
74647620	0.208333	2.53974	387.217
74648220	0.215278	2.6244	387.194
74648820	0.222222	2.70906	387.17
74649420	0.229167	2.79372	387.146
74650020	0.236111	2.87837	387.122
74650620	0.243056	2.96303	387.099
74651220	0.25	3.04769	387.075
74651820	0.256944	3.13235	387.051
74652420	0.263889	3.21701	387.027
74653020	0.270833	3.30166	387.004
74653620	0.277778	3.38632	386.98
74654220	0.284722	3.47098	386.956
74654820	0.291667	3.55564	386.932
74655420	0.298611	3.6403	386.909
74656020	0.305556	3.72496	386.885
7.46566e+07	0.3125	3.80961	386.861
7.46572e+07	0.319444	3.89427	386.837
7.46578e+07	0.326389	3.97893	386.813
7.46584e+07	0.333333	4.06359	386.79
7.4659e+07	0.340278	4.14825	386.766
7.46596e+07	0.347222	4.2329	386.742
7.46602e+07	0.354167	4.31756	386.718
74660820	0.361111	4.40222	386.694
74661420	0.368056	4.48688	386.67
74662020	0.375	4.57154	386.647
74662620	0.381944	4.65619	386.623
74663220	0.388889	4.74085	386.599
74663820	0.395833	4.82551	386.575
74664420	0.402778	4.91017	386.551
7.4665e+07	0.409722	4.99483	386.527
7.46656e+07	0.416667	5.07948	386.503
7.46662e+07	0.423611	5.16414	386.48
7.46668e+07	0.430556	5.2488	386.456
7.46674e+07	0.4375	5.33346	386.432
7.4668e+07	0.444444	5.41812	386.408
7.46686e+07	0.451389	5.50277	386.384
7.46692e+07	0.458333	5.58743	386.36
7.46698e+07	0.465278	5.67209	386.336
7.46704e+07	0.472222	5.75675	386.312
7.4671e+07	0.479167	5.84141	386.288
7.46716e+07	0.486111	5.92607	386.265
7.46722e+07	0.493056	6.01072	386.241
7.46728e+07	0.5	6.09538	386.217
7.46734e+07	0.506944	6.18004	386.193
7.4674e+07	0.513889	6.2647	386.169
7.46746e+07	0.520833	6.34936	386.145
7.46752e+07	0.527778	6.43401	386.121
7.46758e+07	0.534722	6.51867	386.097
7.46764e+07	0.541667	6.60333	386.073
7.4677e+07	0.548611	6.68799	386.049
7.46776e+07	0.555556	6.77265	386.025
7.46782e+07	0.5625	6.8573	386.001
7.46788e+07	0.569444	6.94196	385.977
7.46794e+07	0.576389	7.02662	385.953
7.468e+07	0.583333	7.11128	385.929
7.46806e+07	0.590278	7.19594	385.905
7.46812e+07	0.597222	7.28059	385.881
7.46818e+07	0.604167	7.36525	385.857
7.46824e+07	0.611111	7.44991	385.833
7.4683e+07	0.618056	7.53457	385.809
7.46836e+07	0.625	7.61923	385.785
7.46842e+07	0.631944	7.70388	385.761
7.46848e+07	0.638889	7.78854	385.737
7.46854e+07	0.645833	7.8732	385.713
7.4686e+07	0.652778	7.95786	385.689
7.46866e+07	0.659722	8.04252	385.665
7.46872e+07	0.666667	8.12718	385.641
7.46878e+07	0.673611	8.21183	385.617
7.46884e+07	0.680556	8.29649	385.593
7.4689e+07	0.6875	8.38115	385.569
7.46896e+07	0.694444	8.46581	385.545
7.46902e+07	0.701389	8.55047	385.521
7.46908e+07	0.708333	8.63512	385.497
7.46914e+07	0.715278	8.71978	385.473
7.4692e+07	0.722222	8.80444	385.448
7.46926e+07	0.729167	8.8891	385.424
7.46932e+07	0.736111	8.97376	385.4
7.46938e+07	0.743056	9.05841	385.376
7.46944e+07	0.75	9.14307	385.352
7.4695e+07	0.756944	9.22773	385.328
7.46956e+07	0.763889	9.31239	385.304
7.46962e+07	0.770833	9.39705	385.28
7.46968e+07	0.777778	9.4817	385.256
7.46974e+07	0.784722	9.56636	385.232
7.4698e+07	0.791667	9.65102	385.207
7.46986e+07	0.798611	9.73568	385.183
7.46992e+07	0.805556	9.82034	385.159
7.46998e+07	0.8125	9.90499	385.135
7.47004e+07	0.819444	9.98965	385.111
7.4701e+07	0.826389	10.0743	385.087
7.47016e+07	0.833333	10.159	385.062
7.47022e+07	0.840278	10.2436	385.038
7.47028e+07	0.847222	10.3283	385.014
7.47034e+07	0.854167	10.4129	384.99
7.4704e+07	0.861111	10.4976	384.966
7.47046e+07	0.868056	10.5823	384.942
7.47052e+07	0.875	10.6669	384.917
7.47058e+07	0.881944	10.7516	384.893
7.47064e+07	0.888889	10.8362	384.869
7.4707e+07	0.895833	10.9209	384.845
7.47076e+07	0.902778	11.0055	384.821
7.47082e+07	0.909722	11.0902	384.796
7.47088e+07	0.916667	11.1749	384.772
7.47094e+07	0.923611	11.2595	384.748
7.471e+07	0.930556	11.3442	384.724
7.47106e+07	0.9375	11.4288	384.699
7.47112e+07	0.944444	11.5135	384.675
7.47118e+07	0.951389	11.5982	384.651
7.47124e+07	0.958333	11.6828	384.627
7.4713e+07	0.965278	11.7675	384.602
7.47136e+07	0.972222	11.8521	384.578
7.47142e+07	0.979167	11.9368	384.554
7.47148e+07	0.986111	12.0214	384.53
7.47154e+07	0.993056	12.1061	384.505
7.4716e+07	1	12.1908	384.481
7.47166e+07	1.00694	12.2754	384.457
7.47172e+07	1.01389	12.3601	384.432
7.47178e+07	1.02083	12.4447	384.408
7.47184e+07	1.02778	12.5294	384.384
7.4719e+07	1.03472	12.6141	384.36
7.47196e+07	1.04167	12.6987	384.335
7.47202e+07	1.04861	12.7834	384.311
7.47208e+07	1.05556	12.868	384.287
7.47214e+07	1.0625	12.9527	384.262
7.4722e+07	1.06944	13.0373	384.238
7.47226e+07	1.07639	13.122	384.214
7.47232e+07	1.08333	13.2067	384.189
7.47238e+07	1.09028	13.2913	384.165
7.47244e+07	1.09722	13.376	384.141
7.4725e+07	1.10417	13.4606	384.116
7.47256e+07	1.11111	13.5453	384.092
7.47262e+07	1.11806	13.63	384.068
7.47268e+07	1.125	13.7146	384.043
7.47274e+07	1.13194	13.7993	384.019
7.4728e+07	1.13889	13.8839	383.994
7.47286e+07	1.14583	13.9686	383.97
7.47292e+07	1.15278	14.0532	383.946
7.47298e+07	1.15972	14.1379	383.921
7.47304e+07	1.16667	14.2226	383.897
7.4731e+07	1.17361	14.3072	383.872
7.47316e+07	1.18056	14.3919	383.848
7.47322e+07	1.1875	14.4765	383.824
7.47328e+07	1.19444	14.5612	383.799
7.47334e+07	1.20139	14.6458	383.775
7.4734e+07	1.20833	14.7305	383.75
7.47346e+07	1.21528	14.8152	383.726
7.47352e+07	1.22222	14.8998	383.701
7.47358e+07	1.22917	14.9845	383.677
7.47364e+07	1.23611	15.0691	383.653
7.4737e+07	1.24306	15.1538	383.628
7.47376e+07	1.25	15.2385	383.604
7.47382e+07	1.25694	15.3231	383.579
7.47388e+07	1.26389	15.4078	383.555
7.47394e+07	1.27083	15.4924	383.53
7.474e+07	1.27778	15.5771	383.506
7.47406e+07	1.28472	15.6617	383.481
7.47412e+07	1.29167	15.7464	383.457
7.47418e+07	1.29861	15.8311	383.432
7.47424e+07	1.30556	15.9157	383.408
7.4743e+07	1.3125	16.0004	383.383
7.47436e+07	1.31944	16.085	383.359
7.47442e+07	1.32639	16.1697	383.334
7.47448e+07	1.33333	16.2544	383.31
7.47454e+07	1.34028	16.339	383.285
7.4746e+07	1.34722	16.4237	383.261
7.47466e+07	1.35417	16.5083	383.236
7.47472e+07	1.36111	16.593	383.212
7.47478e+07	1.36806	16.6776	383.187
7.47484e+07	1.375	16.7623	383.162
7.4749e+07	1.38194	16.847	383.138
7.47496e+07	1.38889	16.9316	383.113
7.47502e+07	1.39583	17.0163	383.089
7.47508e+07	1.40278	17.1009	383.064
7.47514e+07	1.40972	17.1856	383.04
7.4752e+07	1.41667	17.2702	383.015
7.47526e+07	1.42361	17.3549	382.99
7.47532e+07	1.43056	17.4396	382.966
7.47538e+07	1.4375	17.5242	382.941
7.47544e+07	1.44444	17.6089	382.917
7.4755e+07	1.45139	17.6935	382.892
7.47556e+07	1.45833	17.7782	382.867
7.47562e+07	1.46528	17.8629	382.843
7.47568e+07	1.47222	17.9475	382.818
7.47574e+07	1.47917	18.0322	382.791
7.4758e+07	1.48611	18.1168	382.743
7.47586e+07	1.49306	18.2015	382.681
7.47592e+07	1.5	18.2861	382.612
7.47598e+07	1.50694	18.3708	382.54
7.47604e+07	1.51389	18.4555	382.465
7.4761e+07	1.52083	18.5401	382.39
7.47616e+07	1.52778	18.6248	382.315
7.47622e+07	1.53472	18.7094	382.239
7.47628e+07	1.54167	18.7941	382.163
7.47634e+07	1.54861	18.8788	382.087
7.4764e+07	1.55556	18.9634	382.011
7.47646e+07	1.5625	19.0481	381.935
7.47652e+07	1.56944	19.1327	381.858
7.47658e+07	1.57639	19.2174	381.782
7.47664e+07	1.58333	19.302	381.706
7.4767e+07	1.59028	19.3867	381.63
7.47676e+07	1.59722	19.4714	381.553
7.47682e+07	1.60417	19.556	381.477
7.47688e+07	1.61111	19.6407	381.4
7.47694e+07	1.61806	19.7253	381.324
7.477e+07	1.625	19.81	381.247
7.47706e+07	1.63194	19.8946	381.17
7.47712e+07	1.63889	19.9793	381.094
7.47718e+07	1.64583	20.064	381.017
7.47724e+07	1.65278	20.1486	380.94
7.4773e+07	1.65972	20.2333	380.864
7.47736e+07	1.66667	20.3179	380.787
7.47742e+07	1.67361	20.4026	380.71
7.47748e+07	1.68056	20.4873	380.633
7.47754e+07	1.6875	20.5719	380.556
7.4776e+07	1.69444	20.6566	380.479
7.47766e+07	1.70139	20.7412	380.402
7.47772e+07	1.70833	20.8259	380.324
7.47778e+07	1.71528	20.9105	380.247
7.47784e+07	1.72222	20.9952	380.17
7.4779e+07	1.72917	21.0799	380.093
7.47796e+07	1.73611	21.1645	380.015
7.47802e+07	1.74306	21.2492	379.938
7.47808e+07	1.75	21.3338	379.861
7.47814e+07	1.75694	21.4185	379.783
7.4782e+07	1.76389	21.5032	379.706
7.47826e+07	1.77083	21.5878	379.628
7.47832e+07	1.77778	21.6725	379.55
7.47838e+07	1.78472	21.7571	379.473
7.47844e+07	1.79167	21.8418	379.395
7.4785e+07	1.79861	21.9264	379.317
7.47856e+07	1.80556	22.0111	379.239
7.47862e+07	1.8125	22.0958	379.162
7.47868e+07	1.81944	22.1804	379.084
7.47874e+07	1.82639	22.2651	379.006
7.4788e+07	1.83333	22.3497	378.928
7.47886e+07	1.84028	22.4344	378.85
7.47892e+07	1.84722	22.519	378.772
7.47898e+07	1.85417	22.6037	378.693
7.47904e+07	1.86111	22.6884	378.615
7.4791e+07	1.86806	22.773	378.537
7.47916e+07	1.875	22.8577	378.459
7.47922e+07	1.88194	22.9423	378.38
7.47928e+07	1.88889	23.027	378.302
7.47934e+07	1.89583	23.1117	378.223
7.4794e+07	1.90278	23.1963	378.145
7.47946e+07	1.90972	23.281	378.066
7.47952e+07	1.91667	23.3656	377.988
7.47958e+07	1.92361	23.4503	377.909
7.47964e+07	1.93056	23.5349	377.83
7.4797e+07	1.9375	23.6196	377.752
7.47976e+07	1.94444	23.7043	377.673
7.47982e+07	1.95139	23.7889	377.594
7.47988e+07	1.95833	23.8736	377.515
7.47994e+07	1.96528	23.9582	377.436
7.48e+07	1.97222	24.0429	377.357
7.48006e+07	1.97917	24.1276	377.278
7.48012e+07	1.98611	24.2122	377.199
7.48018e+07	1.99306	24.2969	377.12
7.48024e+07	2	24.3815	377.041
7.4803e+07	2.00694	24.4662	376.961
7.48036e+07	2.01389	24.5508	376.882
7.48042e+07	2.02083	24.6355	376.803
7.48048e+07	2.02778	24.7202	376.723
7.48054e+07	2.03472	24.8048	376.644
7.4806e+07	2.04167	24.8895	376.564
7.48066e+07	2.04861	24.9741	376.485
7.48072e+07	2.05556	25.0588	376.405
7.48078e+07	2.0625	25.1434	376.326
7.48084e+07	2.06944	25.2281	376.246
7.4809e+07	2.07639	25.3128	376.166
7.48096e+07	2.08333	25.3974	376.086
7.48102e+07	2.09028	25.4821	376.007
7.48108e+07	2.09722	25.5667	375.927
7.48114e+07	2.10417	25.6514	375.847
7.4812e+07	2.11111	25.7361	375.767
7.48126e+07	2.11806	25.8207	375.687
7.48132e+07	2.125	25.9054	375.607
7.48138e+07	2.13194	25.99	375.526
7.48144e+07	2.13889	26.0747	375.446
7.4815e+07	2.14583	26.1593	375.366
7.48156e+07	2.15278	26.244	375.286
7.48162e+07	2.15972	26.3287	375.205
7.48168e+07	2.16667	26.4133	375.125
7.48174e+07	2.17361	26.498	375.044
7.4818e+07	2.18056	26.5826	374.964
7.48186e+07	2.1875	26.6673	374.883
7.48192e+07	2.19444	26.752	374.803
7.48198e+07	2.20139	26.8366	374.722
7.48204e+07	2.20833	26.9213	374.641
7.4821e+07	2.21528	27.0059	374.56
7.48216e+07	2.22222	27.0906	374.48
7.48222e+07	2.22917	27.1752	374.399
7.48228e+07	2.23611	27.2599	374.318
7.48234e+07	2.24306	27.3446	374.237
7.4824e+07	2.25	27.4292	374.156
7.48246e+07	2.25694	27.5139	374.075
7.48252e+07	2.26389	27.5985	373.993
7.48258e+07	2.27083	27.6832	373.912
7.48264e+07	2.27778	27.7678	373.831
7.4827e+07	2.28472	27.8525	373.75
7.48276e+07	2.29167	27.9372	373.668
7.48282e+07	2.29861	28.0218	373.587
7.48288e+07	2.30556	28.1065	373.505
7.48294e+07	2.3125	28.1911	373.424
7.483e+07	2.31944	28.2758	373.342
7.48306e+07	2.32639	28.3605	373.261
7.48312e+07	2.33333	28.4451	373.179
7.48318e+07	2.34028	28.5298	373.097
7.48324e+07	2.34722	28.6144	373.015
7.4833e+07	2.35417	28.6991	372.933
7.48336e+07	2.36111	28.7837	372.852
7.48342e+07	2.36806	28.8684	372.77
7.48348e+07	2.375	28.9531	372.688
7.48354e+07	2.38194	29.0377	372.605
7.4836e+07	2.38889	29.1224	372.523
7.48366e+07	2.39583	29.207	372.441
7.48372e+07	2.40278	29.2917	372.359
7.48378e+07	2.40972	29.3764	372.277
7.48384e+07	2.41667	29.461	372.194
7.4839e+07	2.42361	29.5457	372.112
7.48396e+07	2.43056	29.6303	372.029
7.48402e+07	2.4375	29.715	371.947
7.48408e+07	2.44444	29.7996	371.864
7.48414e+07	2.45139	29.8843	371.782
7.4842e+07	2.45833	29.969	371.699
7.48426e+07	2.46528	30.0536	371.616
7.48432e+07	2.47222	30.1383	371.534
7.48438e+07	2.47917	30.2229	371.451
7.48444e+07	2.48611	30.3076	371.368
7.4845e+07	2.49306	30.3922	371.285
7.48456e+07	2.5	30.4769	371.202
7.48462e+07	2.50694	30.5616	371.119
7.48468e+07	2.51389	30.6462	371.036
7.48474e+07	2.52083	30.7309	370.952
7.4848e+07	2.52778	30.8155	370.869
7.48486e+07	2.53472	30.9002	370.786
7.48492e+07	2.54167	30.9849	370.703
7.48498e+07	2.54861	31.0695	370.619
7.48504e+07	2.55556	31.1542	370.536
7.4851e+07	2.5625	31.2388	370.452
7.48516e+07	2.56944	31.3235	370.369
7.48522e+07	2.57639	31.4081	370.285
7.48528e+07	2.58333	31.4928	370.201
7.48534e+07	2.59028	31.5775	370.118
7.4854e+07	2.59722	31.6621	370.034
7.48546e+07	2.60417	31.7468	369.95
7.48552e+07	2.61111	31.8314	369.866
7.48558e+07	2.61806	31.9161	369.782
7.48564e+07	2.625	32.0008	369.698
7.4857e+07	2.63194	32.0854	369.614
7.48576e+07	2.63889	32.1701	369.53
7.48582e+07	2.64583	32.2547	369.445
7.48588e+07	2.65278	32.3394	369.361
7.48594e+07	2.65972	32.424	369.277
7.486e+07	2.66667	32.5087	369.192
7.48606e+07	2.67361	32.5934	369.108
7.48612e+07	2.68056	32.678	369.024
7.48618e+07	2.6875	32.7627	368.939
7.48624e+07	2.69444	32.8473	368.854
7.4863e+07	2.70139	32.932	368.77
7.48636e+07	2.70833	33.0166	368.685
7.48642e+07	2.71528	33.1013	368.6
7.48648e+07	2.72222	33.186	368.515
7.48654e+07	2.72917	33.2706	368.43
7.4866e+07	2.73611	33.3553	368.345
7.48666e+07	2.74306	33.4399	368.26
7.48672e+07	2.75	33.5246	368.175
7.48678e+07	2.75694	33.6093	368.09
7.48684e+07	2.76389	33.6939	368.005
7.4869e+07	2.77083	33.7786	367.92
7.48696e+07	2.77778	33.8632	367.834
7.48702e+07	2.78472	33.9479	367.749
7.48708e+07	2.79167	34.0325	367.664
7.48714e+07	2.79861	34.1172	367.578
7.4872e+07	2.80556	34.2019	367.493
7.48726e+07	2.8125	34.2865	367.407
7.48732e+07	2.81944	34.3712	367.321
7.48738e+07	2.82639	34.4558	367.235
7.48744e+07	2.83333	34.5405	367.15
7.4875e+07	2.84028	34.6252	367.064
7.48756e+07	2.84722	34.7098	366.978
7.48762e+07	2.85417	34.7945	366.892
7.48768e+07	2.86111	34.8791	366.806
7.48774e+07	2.86806	34.9638	366.72
7.4878e+07	2.875	35.0484	366.634
7.48786e+07	2.88194	35.1331	366.547
7.48792e+07	2.88889	35.2178	366.461
7.48798e+07	2.89583	35.3024	366.375
7.48804e+07	2.90278	35.3871	366.288
7.4881e+07	2.90972	35.4717	366.202
7.48816e+07	2.91667	35.5564	366.115
7.48822e+07	2.92361	35.641	366.029
7.48828e+07	2.93056	35.7257	365.942
7.48834e+07	2.9375	35.8104	365.855
7.4884e+07	2.94444	35.895	365.769
7.48846e+07	2.95139	35.9797	365.682
7.48852e+07	2.95833	36.0643	365.587
7.48858e+07	2.96528	36.149	365.473
7.48864e+07	2.97222	36.2337	365.349
7.4887e+07	2.97917	36.3183	365.218
7.48876e+07	2.98611	36.403	365.084
7.48882e+07	2.99306	36.4876	364.948
7.48888e+07	3	36.5723	364.812
7.48894e+07	3.00694	36.6569	364.674
7.489e+07	3.01389	36.7416	364.536
7.48906e+07	3.02083	36.8263	364.398
7.48912e+07	3.02778	36.9109	364.26
7.48918e+07	3.03472	36.9956	364.121
7.48924e+07	3.04167	37.0802	363.983
7.4893e+07	3.04861	37.1649	363.844
7.48936e+07	3.05556	37.2496	363.705
7.48942e+07	3.0625	37.3342	363.566
7.48948e+07	3.06944	37.4189	363.426
7.48954e+07	3.07639	37.5035	363.287
7.4896e+07	3.08333	37.5882	363.147
7.48966e+07	3.09028	37.6728	363.007
7.48972e+07	3.09722	37.7575	362.867
7.48978e+07	3.10417	37.8422	362.727
7.48984e+07	3.11111	37.9268	362.587
7.4899e+07	3.11806	38.0115	362.446
7.48996e+07	3.125	38.0961	362.306
7.49002e+07	3.13194	38.1808	362.165
7.49008e+07	3.13889	38.2655	362.024
7.49014e+07	3.14583	38.3501	361.883
7.4902e+07	3.15278	38.4348	361.741
7.49026e+07	3.15972	38.5194	361.6
7.49032e+07	3.16667	38.6041	361.458
7.49038e+07	3.17361	38.6887	361.316
7.49044e+07	3.18056	38.7734	361.174
7.4905e+07	3.1875	38.8581	361.032
7.49056e+07	3.19444	38.9427	360.89
7.49062e+07	3.20139	39.0274	360.748
7.49068e+07	3.20833	39.112	360.605
7.49074e+07	3.21528	39.1967	360.462
7.4908e+07	3.22222	39.2813	360.319
7.49086e+07	3.22917	39.366	360.176
7.49092e+07	3.23611	39.4507	360.033
7.49098e+07	3.24306	39.5353	359.889
7.49104e+07	3.25	39.62	359.745
7.4911e+07	3.25694	39.7046	359.602
7.49116e+07	3.26389	39.7893	359.458
7.49122e+07	3.27083	39.874	359.313
7.49128e+07	3.27778	39.9586	359.169
7.49134e+07	3.28472	40.0433	359.025
7.4914e+07	3.29167	40.1279	358.88
7.49146e+07	3.29861	40.2126	358.735
7.49152e+07	3.30556	40.2972	358.59
7.49158e+07	3.3125	40.3819	358.445
7.49164e+07	3.31944	40.4666	358.299
7.4917e+07	3.32639	40.5512	358.154
7.49176e+07	3.33333	40.6359	358.008
7.49182e+07	3.34028	40.7205	357.862
7.49188e+07	3.34722	40.8052	357.716
7.49194e+07	3.35417	40.8899	357.57
7.492e+07	3.36111	40.9745	357.423
7.49206e+07	3.36806	41.0592	357.277
7.49212e+07	3.375	41.1438	357.13
7.49218e+07	3.38194	41.2285	356.983
7.49224e+07	3.38889	41.3131	356.836
7.4923e+07	3.39583	41.3978	356.688
7.49236e+07	3.40278	41.4825	356.541
7.49242e+07	3.40972	41.5671	356.393
7.49248e+07	3.41667	41.6518	356.245
7.49254e+07	3.42361	41.7364	356.097
7.4926e+07	3.43056	41.8211	355.949
7.49266e+07	3.4375	41.9057	355.8
7.49272e+07	3.44444	41.9904	355.651
7.49278e+07	3.45139	42.0751	355.503
7.49284e+07	3.45833	42.1597	355.354
7.4929e+07	3.46528	42.2444	355.204
7.49296e+07	3.47222	42.329	355.055
7.49302e+07	3.47917	42.4137	354.905
7.49308e+07	3.48611	42.4984	354.756
7.49314e+07	3.49306	42.583	354.606
7.4932e+07	3.5	42.6677	354.456
7.49326e+07	3.50694	42.7523	354.305
7.49332e+07	3.51389	42.837	354.155
7.49338e+07	3.52083	42.9216	354.004
7.49344e+07	3.52778	43.0063	353.853
7.4935e+07	3.53472	43.091	353.702
7.49356e+07	3.54167	43.1756	353.551
7.49362e+07	3.54861	43.2603	353.399
7.49368e+07	3.55556	43.3449	353.247
7.49374e+07	3.5625	43.4296	353.096
7.4938e+07	3.56944	43.5143	352.943
7.49386e+07	3.57639	43.5989	352.791
7.49392e+07	3.58333	43.6836	352.639
7.49398e+07	3.59028	43.7682	352.486
7.49404e+07	3.59722	43.8529	352.333
7.4941e+07	3.60417	43.9375	352.18
7.49416e+07	3.61111	44.0222	352.027
7.49422e+07	3.61806	44.1069	351.873
7.49428e+07	3.625	44.1915	351.72
7.49434e+07	3.63194	44.2762	351.566
7.4944e+07	3.63889	44.3608	351.412
7.49446e+07	3.64583	44.4455	351.258
7.49452e+07	3.65278	44.5301	351.103
7.49458e+07	3.65972	44.6148	350.948
7.49464e+07	3.66667	44.6995	350.794
7.4947e+07	3.67361	44.7841	350.638
7.49476e+07	3.68056	44.8688	350.483
7.49482e+07	3.6875	44.9534	350.328
7.49488e+07	3.69444	45.0381	350.172
7.49494e+07	3.70139	45.1228	350.016
7.495e+07	3.70833	45.2074	349.86
7.49506e+07	3.71528	45.2921	349.704
7.49512e+07	3.72222	45.3767	349.547
7.49518e+07	3.72917	45.4614	349.39
7.49524e+07	3.73611	45.546	349.233
7.4953e+07	3.74306	45.6307	349.076
7.49536e+07	3.75	45.7154	348.919
7.49542e+07	3.75694	45.8	348.761
7.49548e+07	3.76389	45.8847	348.603
7.49554e+07	3.77083	45.9693	348.445
7.4956e+07	3.77778	46.054	348.287
7.49566e+07	3.78472	46.1387	348.129
7.49572e+07	3.79167	46.2233	347.97
7.49578e+07	3.79861	46.308	347.811
7.49584e+07	3.80556	46.3926	347.652
7.4959e+07	3.8125	46.4773	347.493
7.49596e+07	3.81944	46.5619	347.333
7.49602e+07	3.82639	46.6466	347.174
7.49608e+07	3.83333	46.7313	347.014
7.49614e+07	3.84028	46.8159	346.853
7.4962e+07	3.84722	46.9006	346.693
7.49626e+07	3.85417	46.9852	346.532
7.49632e+07	3.86111	47.0699	346.372
7.49638e+07	3.86806	47.1545	346.21
7.49644e+07	3.875	47.2392	346.049
7.4965e+07	3.88194	47.3239	345.888
7.49656e+07	3.88889	47.4085	345.726
7.49662e+07	3.89583	47.4932	345.564
7.49668e+07	3.90278	47.5778	345.402
7.49674e+07	3.90972	47.6625	345.239
7.4968e+07	3.91667	47.7472	345.077
7.49686e+07	3.92361	47.8318	344.914
7.49692e+07	3.93056	47.9165	344.751
7.49698e+07	3.9375	48.0011	344.587
7.49704e+07	3.94444	48.0858	344.424
7.4971e+07	3.95139	48.1704	344.26
7.49716e+07	3.95833	48.2551	344.096
7.49722e+07	3.96528	48.3398	343.932
7.49728e+07	3.97222	48.4244	343.767
7.49734e+07	3.97917	48.5091	343.603
7.4974e+07	3.98611	48.5937	343.438
7.49746e+07	3.99306	48.6784	343.272
7.49752e+07	4	48.7631	343.107
7.49758e+07	4.00694	48.8477	342.941
7.49764e+07	4.01389	48.9324	342.775
7.4977e+07	4.02083	49.017	342.609
7.49776e+07	4.02778	49.1017	342.443
7.49782e+07	4.03472	49.1863	342.276
7.49788e+07	4.04167	49.271	342.109
7.49794e+07	4.04861	49.3557	341.942
7.498e+07	4.05556	49.4403	341.775
7.49806e+07	4.0625	49.525	341.607
7.49812e+07	4.06944	49.6096	341.439
7.49818e+07	4.07639	49.6943	341.271
7.49824e+07	4.08333	49.7789	341.103
7.4983e+07	4.09028	49.8636	340.934
7.49836e+07	4.09722	49.9483	340.765
7.49842e+07	4.10417	50.0329	340.596
7.49848e+07	4.11111	50.1176	340.427
7.49854e+07	4.11806	50.2022	340.257
7.4986e+07	4.125	50.2869	340.088
7.49866e+07	4.13194	50.3716	339.918
7.49872e+07	4.13889	50.4562	339.747
7.49878e+07	4.14583	50.5409	339.577
7.49884e+07	4.15278	50.6255	339.406
7.4989e+07	4.15972	50.7102	339.235
7.49896e+07	4.16667	50.7948	339.063
7.49902e+07	4.17361	50.8795	338.892
7.49908e+07	4.18056	50.9642	338.72
7.49914e+07	4.1875	51.0488	338.548
7.4992e+07	4.19444	51.1335	338.375
7.49926e+07	4.20139	51.2181	338.203
7.49932e+07	4.20833	51.3028	338.03
7.49938e+07	4.21528	51.3875	337.856
7.49944e+07	4.22222	51.4721	337.683
7.4995e+07	4.22917	51.5568	337.509
7.49956e+07	4.23611	51.6414	337.335
7.49962e+07	4.24306	51.7261	337.161
7.49968e+07	4.25	51.8107	336.986
7.49974e+07	4.25694	51.8954	336.812
7.4998e+07	4.26389	51.9801	336.637
7.49986e+07	4.27083	52.0647	336.461
7.49992e+07	4.27778	52.1494	336.286
7.49998e+07	4.28472	52.234	336.11
7.50004e+07	4.29167	52.3187	335.934
7.5001e+07	4.29861	52.4033	335.757
7.50016e+07	4.30556	52.488	335.581
7.50022e+07	4.3125	52.5727	335.404
7.50028e+07	4.31944	52.6573	335.226
7.50034e+07	4.32639	52.742	335.049
7.5004e+07	4.33333	52.8266	334.871
7.50046e+07	4.34028	52.9113	334.693
7.50052e+07	4.34722	52.996	334.515
7.50058e+07	4.35417	53.0806	334.336
7.50064e+07	4.36111	53.1653	334.157
7.5007e+07	4.36806	53.2499	333.978
7.50076e+07	4.375	53.3346	333.798
7.50082e+07	4.38194	53.4192	333.618
7.50088e+07	4.38889	53.5039	333.438
7.50094e+07	4.39583	53.5886	333.258
7.501e+07	4.40278	53.6732	333.077
7.50106e+07	4.40972	53.7579	332.896
7.50112e+07	4.41667	53.8425	332.715
7.50118e+07	4.42361	53.9272	332.533
7.50124e+07	4.43056	54.0119	332.352
7.5013e+07	4.4375	54.0965	332.161
7.50136e+07	4.44444	54.1812	331.962
7.50142e+07	4.45139	54.2658	331.756
7.50148e+07	4.45833	54.3505	331.547
7.50154e+07	4.46528	54.4351	331.335
7.5016e+07	4.47222	54.5198	331.121
7.50166e+07	4.47917	54.6045	330.906
7.50172e+07	4.48611	54.6891	330.69
7.50178e+07	4.49306	54.7738	330.473
7.50184e+07	4.5	54.8584	330.255
7.5019e+07	4.50694	54.9431	330.037
7.50196e+07	4.51389	55.0277	329.819
7.50202e+07	4.52083	55.1124	329.6
7.50208e+07	4.52778	55.1971	329.38
7.50214e+07	4.53472	55.2817	329.16
7.5022e+07	4.54167	55.3664	328.94
7.50226e+07	4.54861	55.451	328.719
7.50232e+07	4.55556	55.5357	328.498
7.50238e+07	4.5625	55.6204	328.276
7.50244e+07	4.56944	55.705	328.054
7.5025e+07	4.57639	55.7897	327.831
7.50256e+07	4.58333	55.8743	327.608
7.50262e+07	4.59028	55.959	327.385
7.50268e+07	4.59722	56.0436	327.161
7.50274e+07	4.60417	56.1283	326.936
7.5028e+07	4.61111	56.213	326.711
7.50286e+07	4.61806	56.2976	326.486
7.50292e+07	4.625	56.3823	326.26
7.50298e+07	4.63194	56.4669	326.034
7.50304e+07	4.63889	56.5516	325.807
7.5031e+07	4.64583	56.6363	325.58
7.50316e+07	4.65278	56.7209	325.352
7.50322e+07	4.65972	56.8056	325.124
7.50328e+07	4.66667	56.8902	324.896
7.50334e+07	4.67361	56.9749	324.667
7.5034e+07	4.68056	57.0595	324.437
7.50346e+07	4.6875	57.1442	324.207
7.50352e+07	4.69444	57.2289	323.976
7.50358e+07	4.70139	57.3135	323.745
7.50364e+07	4.70833	57.3982	323.514
7.5037e+07	4.71528	57.4828	323.282
7.50376e+07	4.72222	57.5675	323.049
7.50382e+07	4.72917	57.6521	322.816
7.50388e+07	4.73611	57.7368	322.583
7.50394e+07	4.74306	57.8215	322.349
7.504e+07	4.75	57.9061	322.115
7.50406e+07	4.75694	57.9908	321.88
7.50412e+07	4.76389	58.0754	321.644
7.50418e+07	4.77083	58.1601	321.408
7.50424e+07	4.77778	58.2448	321.172
7.5043e+07	4.78472	58.3294	320.934
7.50436e+07	4.79167	58.4141	320.697
7.50442e+07	4.79861	58.4987	320.459
7.50448e+07	4.80556	58.5834	320.22
7.50454e+07	4.8125	58.668	319.981
7.5046e+07	4.81944	58.7527	319.741
7.50466e+07	4.82639	58.8374	319.501
7.50472e+07	4.83333	58.922	319.261
7.50478e+07	4.84028	59.0067	319.019
7.50484e+07	4.84722	59.0913	318.777
7.5049e+07	4.85417	59.176	318.535
7.50496e+07	4.86111	59.2607	318.292
7.50502e+07	4.86806	59.3453	318.049
7.50508e+07	4.875	59.43	317.805
7.50514e+07	4.88194	59.5146	317.56
7.5052e+07	4.88889	59.5993	317.315
7.50526e+07	4.89583	59.6839	317.07
7.50532e+07	4.90278	59.7686	316.823
7.50538e+07	4.90972	59.8533	316.577
7.50544e+07	4.91667	59.9379	316.329
7.5055e+07	4.92361	60.0226	316.081
7.50556e+07	4.93056	60.1072	315.833
7.50562e+07	4.9375	60.1919	315.584
7.50568e+07	4.94444	60.2765	315.334
7.50574e+07	4.95139	60.3612	315.084
7.5058e+07	4.95833	60.4459	314.833
7.50586e+07	4.96528	60.5305	314.582
7.50592e+07	4.97222	60.6152	314.33
7.50598e+07	4.97917	60.6998	314.077
7.50604e+07	4.98611	60.7845	313.824
7.5061e+07	4.99306	60.8692	313.57
7.50616e+07	5	60.9538	313.316
7.50622e+07	5.00694	61.0385	313.061
7.50628e+07	5.01389	61.1231	312.805
7.50634e+07	5.02083	61.2078	312.549
7.5064e+07	5.02778	61.2924	312.292
7.50646e+07	5.03472	61.3771	312.034
7.50652e+07	5.04167	61.4618	311.776
7.50658e+07	5.04861	61.5464	311.517
7.50664e+07	5.05556	61.6311	311.258
7.5067e+07	5.0625	61.7157	310.998
7.50676e+07	5.06944	61.8004	310.737
7.50682e+07	5.07639	61.8851	310.476
7.50688e+07	5.08333	61.9697	310.214
7.50694e+07	5.09028	62.0544	309.951
7.507e+07	5.09722	62.139	309.688
7.50706e+07	5.10417	62.2237	309.424
7.50712e+07	5.11111	62.3083	309.159
7.50718e+07	5.11806	62.393	308.894
7.50724e+07	5.125	62.4777	308.628
7.5073e+07	5.13194	62.5623	308.362
7.50736e+07	5.13889	62.647	308.094
7.50742e+07	5.14583	62.7316	307.826
7.50748e+07	5.15278	62.8163	307.558
7.50754e+07	5.15972	62.9009	307.288
7.5076e+07	5.16667	62.9856	307.018
7.50766e+07	5.17361	63.0703	306.748
7.50772e+07	5.18056	63.1549	306.476
7.50778e+07	5.1875	63.2396	306.204
7.50784e+07	5.19444	63.3242	305.931
7.5079e+07	5.20139	63.4089	305.657
7.50796e+07	5.20833	63.4936	305.383
7.50802e+07	5.21528	63.5782	305.108
7.50808e+07	5.22222	63.6629	304.832
7.50814e+07	5.22917	63.7475	304.556
7.5082e+07	5.23611	63.8322	304.279
7.50826e+07	5.24306	63.9168	304.001
7.50832e+07	5.25	64.0015	303.722
7.50838e+07	5.25694	64.0862	303.442
7.50844e+07	5.26389	64.1708	303.162
7.5085e+07	5.27083	64.2555	302.881
7.50856e+07	5.27778	64.3401	302.599
7.50862e+07	5.28472	64.4248	302.317
7.50868e+07	5.29167	64.5095	302.034
7.50874e+07	5.29861	64.5941	301.749
7.5088e+07	5.30556	64.6788	301.465
7.50886e+07	5.3125	64.7634	301.179
7.50892e+07	5.31944	64.8481	300.892
7.50898e+07	5.32639	64.9327	300.605
7.50904e+07	5.33333	65.0174	300.317
7.5091e+07	5.34028	65.1021	300.028
7.50916e+07	5.34722	65.1867	299.739
7.50922e+07	5.35417	65.2714	299.448
7.50928e+07	5.36111	65.356	299.157
7.50934e+07	5.36806	65.4407	298.864
7.5094e+07	5.375	65.5254	298.571
7.50946e+07	5.38194	65.61	298.278
7.50952e+07	5.38889	65.6947	297.983
7.50958e+07	5.39583	65.7793	297.687
7.50964e+07	5.40278	65.864	297.391
7.5097e+07	5.40972	65.9486	297.094
7.50976e+07	5.41667	66.0333	296.795
7.50982e+07	5.42361	66.118	296.496
7.50988e+07	5.43056	66.2026	296.196
7.50994e+07	5.4375	66.2873	295.896
7.51e+07	5.44444	66.3719	295.594
7.51006e+07	5.45139	66.4566	295.291
7.51012e+07	5.45833	66.5412	294.988
7.51018e+07	5.46528	66.6259	294.683
7.51024e+07	5.47222	66.7106	294.378
7.5103e+07	5.47917	66.7952	294.072
7.51036e+07	5.48611	66.8799	293.764
7.51042e+07	5.49306	66.9645	293.456
7.51048e+07	5.5	67.0492	293.147
7.51054e+07	5.50694	67.1339	292.837
7.5106e+07	5.51389	67.2185	292.526
7.51066e+07	5.52083	67.3032	292.214
7.51072e+07	5.52778	67.3878	291.901
7.51078e+07	5.53472	67.4725	291.587
7.51084e+07	5.54167	67.5571	291.272
7.5109e+07	5.54861	67.6418	290.956
7.51096e+07	5.55556	67.7265	290.639
7.51102e+07	5.5625	67.8111	290.321
7.51108e+07	5.56944	67.8958	290.002
7.51114e+07	5.57639	67.9804	289.682
7.5112e+07	5.58333	68.0651	289.361
7.51126e+07	5.59028	68.1498	289.039
7.51132e+07	5.59722	68.2344	288.716
7.51138e+07	5.60417	68.3191	288.392
7.51144e+07	5.61111	68.4037	288.067
7.5115e+07	5.61806	68.4884	287.74
7.51156e+07	5.625	68.573	287.413
7.51162e+07	5.63194	68.6577	287.085
7.51168e+07	5.63889	68.7424	286.755
7.51174e+07	5.64583	68.827	286.424
7.5118e+07	5.65278	68.9117	286.093
7.51186e+07	5.65972	68.9963	285.76
7.51192e+07	5.66667	69.081	285.426
7.51198e+07	5.67361	69.1656	285.091
7.51204e+07	5.68056	69.2503	284.754
7.5121e+07	5.6875	69.335	284.417
7.51216e+07	5.69444	69.4196	284.078
7.51222e+07	5.70139	69.5043	283.738
7.51228e+07	5.70833	69.5889	283.397
7.51234e+07	5.71528	69.6736	283.055
7.5124e+07	5.72222	69.7583	282.712
7.51246e+07	5.72917	69.8429	282.367
7.51252e+07	5.73611	69.9276	282.021
7.51258e+07	5.74306	70.0122	281.674
7.51264e+07	5.75	70.0969	281.326
7.5127e+07	5.75694	70.1815	280.976
7.51276e+07	5.76389	70.2662	280.626
7.51282e+07	5.77083	70.3509	280.274
7.51288e+07	5.77778	70.4355	279.92
7.51294e+07	5.78472	70.5202	279.565
7.513e+07	5.79167	70.6048	279.21
7.51306e+07	5.79861	70.6895	278.852
7.51312e+07	5.80556	70.7742	278.494
7.51318e+07	5.8125	70.8588	278.134
7.51324e+07	5.81944	70.9435	277.772
7.5133e+07	5.82639	71.0281	277.41
7.51336e+07	5.83333	71.1128	277.046
7.51342e+07	5.84028	71.1974	276.68
7.51348e+07	5.84722	71.2821	276.313
7.51354e+07	5.85417	71.3668	275.945
7.5136e+07	5.86111	71.4514	275.575
7.51366e+07	5.86806	71.5361	275.204
7.51372e+07	5.875	71.6207	274.832
7.51378e+07	5.88194	71.7054	274.458
7.51384e+07	5.88889	71.79	274.082
7.5139e+07	5.89583	71.8747	273.705
7.51396e+07	5.90278	71.9594	273.327
7.51402e+07	5.90972	72.044	272.95
7.51408e+07	5.91667	72.1287	272.586
7.51414e+07	5.92361	72.2133	272.234
7.5142e+07	5.93056	72.298	271.892
7.51426e+07	5.9375	72.3827	271.556
7.51432e+07	5.94444	72.4673	271.225
7.51438e+07	5.95139	72.552	270.897
7.51444e+07	5.95833	72.6366	270.572
7.5145e+07	5.96528	72.7213	270.249
7.51456e+07	5.97222	72.8059	269.926
7.51462e+07	5.97917	72.8906	269.605
7.51468e+07	5.98611	72.9753	269.283
7.51474e+07	5.99306	73.0599	268.961
7.5148e+07	6	73.1446	268.639
7.51486e+07	6.00694	73.2292	268.316
7.51492e+07	6.01389	73.3139	267.993
7.51498e+07	6.02083	73.3986	267.669
7.51504e+07	6.02778	73.4832	267.344
7.5151e+07	6.03472	73.5679	267.018
7.51516e+07	6.04167	73.6525	266.691
7.51522e+07	6.04861	73.7372	266.363
7.51528e+07	6.05556	73.8218	266.034
7.51534e+07	6.0625	73.9065	265.704
7.5154e+07	6.06944	73.9912	265.373
7.51546e+07	6.07639	74.0758	265.04
7.51552e+07	6.08333	74.1605	264.707
7.51558e+07	6.09028	74.2451	264.372
7.51564e+07	6.09722	74.3298	264.036
7.5157e+07	6.10417	74.4144	263.699
7.51576e+07	6.11111	74.4991	263.361
7.51582e+07	6.11806	74.5838	263.021
7.51588e+07	6.125	74.6684	262.68
7.51594e+07	6.13194	74.7531	262.338
7.516e+07	6.13889	74.8377	261.995
7.51606e+07	6.14583	74.9224	261.65
7.51612e+07	6.15278	75.0071	261.304
7.51618e+07	6.15972	75.0917	260.957
7.51624e+07	6.16667	75.1764	260.608
7.5163e+07	6.17361	75.261	260.259
7.51636e+07	6.18056	75.3457	259.907
7.51642e+07	6.1875	75.4303	259.555
7.51648e+07	6.19444	75.515	259.201
7.51654e+07	6.20139	75.5997	258.845
7.5166e+07	6.20833	75.6843	258.488
7.51666e+07	6.21528	75.769	258.13
7.51672e+07	6.22222	75.8536	257.771
7.51678e+07	6.22917	75.9383	257.409
7.51684e+07	6.23611	76.023	257.047
7.5169e+07	6.24306	76.1076	256.683
7.51696e+07	6.25	76.1923	256.318
7.51702e+07	6.25694	76.2769	255.951
7.51708e+07	6.26389	76.3616	255.582
7.51714e+07	6.27083	76.4462	255.212
7.5172e+07	6.27778	76.5309	254.841
7.51726e+07	6.28472	76.6156	254.468
7.51732e+07	6.29167	76.7002	254.093
7.51738e+07	6.29861	76.7849	253.717
7.51744e+07	6.30556	76.8695	253.339
7.5175e+07	6.3125	76.9542	252.96
7.51756e+07	6.31944	77.0388	252.579
7.51762e+07	6.32639	77.1235	252.196
7.51768e+07	6.33333	77.2082	251.812
7.51774e+07	6.34028	77.2928	251.426
7.5178e+07	6.34722	77.3775	251.038
7.51786e+07	6.35417	77.4621	250.649
7.51792e+07	6.36111	77.5468	250.258
7.51798e+07	6.36806	77.6315	249.865
7.51804e+07	6.375	77.7161	249.471
7.5181e+07	6.38194	77.8008	249.074
7.51816e+07	6.38889	77.8854	248.676
7.51822e+07	6.39583	77.9701	248.276
7.51828e+07	6.40278	78.0547	247.875
7.51834e+07	6.40972	78.1394	247.471
7.5184e+07	6.41667	78.2241	247.066
7.51846e+07	6.42361	78.3087	246.658
7.51852e+07	6.43056	78.3934	246.249
7.51858e+07	6.4375	78.478	245.838
7.51864e+07	6.44444	78.5627	245.425
7.5187e+07	6.45139	78.6474	245.01
7.51876e+07	6.45833	78.732	244.593
7.51882e+07	6.46528	78.8167	244.174
7.51888e+07	6.47222	78.9013	243.753
7.51894e+07	6.47917	78.986	243.33
7.519e+07	6.48611	79.0706	242.905
7.51906e+07	6.49306	79.1553	242.477
7.51912e+07	6.5	79.24	242.048
7.51918e+07	6.50694	79.3246	241.616
7.51924e+07	6.51389	79.4093	241.183
7.5193e+07	6.52083	79.4939	240.747
7.51936e+07	6.52778	79.5786	240.309
7.51942e+07	6.53472	79.6632	239.869
7.51948e+07	6.54167	79.7479	239.426
7.51954e+07	6.54861	79.8326	238.981
7.5196e+07	6.55556	79.9172	238.534
7.51966e+07	6.5625	80.0019	238.085
7.51972e+07	6.56944	80.0865	237.633
7.51978e+07	6.57639	80.1712	237.179
7.51984e+07	6.58333	80.2559	236.722
7.5199e+07	6.59028	80.3405	236.263
7.51996e+07	6.59722	80.4252	235.801
7.52002e+07	6.60417	80.5098	235.337
7.52008e+07	6.61111	80.5945	234.87
7.52014e+07	6.61806	80.6791	234.401
7.5202e+07	6.625	80.7638	233.929
7.52026e+07	6.63194	80.8485	233.455
7.52032e+07	6.63889	80.9331	232.978
7.52038e+07	6.64583	81.0178	232.498
7.52044e+07	6.65278	81.1024	232.016
7.5205e+07	6.65972	81.1871	231.53
7.52056e+07	6.66667	81.2718	231.042
7.52062e+07	6.67361	81.3564	230.551
7.52068e+07	6.68056	81.4411	230.057
7.52074e+07	6.6875	81.5257	229.56
7.5208e+07	6.69444	81.6104	229.061
7.52086e+07	6.70139	81.695	228.558
7.52092e+07	6.70833	81.7797	228.052
7.52098e+07	6.71528	81.8644	227.543
7.52104e+07	6.72222	81.949	227.032
7.5211e+07	6.72917	82.0337	226.516
7.52116e+07	6.73611	82.1183	225.998
7.52122e+07	6.74306	82.203	225.477
7.52128e+07	6.75	82.2876	224.952
7.52134e+07	6.75694	82.3723	224.424
7.5214e+07	6.76389	82.457	223.892
7.52146e+07	6.77083	82.5416	223.357
7.52152e+07	6.77778	82.6263	222.819
7.52158e+07	6.78472	82.7109	222.277
7.52164e+07	6.79167	82.7956	221.732
7.5217e+07	6.79861	82.8803	221.183
7.52176e+07	6.80556	82.9649	220.63
7.52182e+07	6.8125	83.0496	220.074
7.52188e+07	6.81944	83.1342	219.513
7.52194e+07	6.82639	83.2189	218.949
7.522e+07	6.83333	83.3035	218.381
7.52206e+07	6.84028	83.3882	217.81
7.52212e+07	6.84722	83.4729	217.234
7.52218e+07	6.85417	83.5575	216.654
7.52224e+07	6.86111	83.6422	216.07
7.5223e+07	6.86806	83.7268	215.481
7.52236e+07	6.875	83.8115	214.889
7.52242e+07	6.88194	83.8962	214.292
7.52248e+07	6.88889	83.9808	213.691
7.52254e+07	6.89583	84.0655	213.085
7.5226e+07	6.90278	84.1501	212.475
7.52266e+07	6.90972	84.2348	211.86
7.52272e+07	6.91667	84.3194	211.24
7.52278e+07	6.92361	84.4041	210.616
7.52284e+07	6.93056	84.4888	209.987
7.5229e+07	6.9375	84.5734	209.353
7.52296e+07	6.94444	84.6581	208.714
7.52302e+07	6.95139	84.7427	208.07
7.52308e+07	6.95833	84.8274	207.42
7.52314e+07	6.96528	84.912	206.766
7.5232e+07	6.97222	84.9967	206.106
7.52326e+07	6.97917	85.0814	205.44
7.52332e+07	6.98611	85.166	204.77
7.52338e+07	6.99306	85.2507	204.093
7.52344e+07	7	85.3353	203.411
7.5235e+07	7.00694	85.42	202.723
7.52356e+07	7.01389	85.5047	202.029
7.52362e+07	7.02083	85.5893	201.329
7.52368e+07	7.02778	85.674	200.623
7.52374e+07	7.03472	85.7586	199.91
7.5238e+07	7.04167	85.8433	199.191
7.52386e+07	7.04861	85.9279	198.466
7.52392e+07	7.05556	86.0126	197.734
7.52398e+07	7.0625	86.0973	196.996
7.52404e+07	7.06944	86.1819	196.25
7.5241e+07	7.07639	86.2666	195.498
7.52416e+07	7.08333	86.3512	194.738
7.52422e+07	7.09028	86.4359	193.971
7.52428e+07	7.09722	86.5206	193.196
7.52434e+07	7.10417	86.6052	192.414
7.5244e+07	7.11111	86.6899	191.625
7.52446e+07	7.11806	86.7745	190.827
7.52452e+07	7.125	86.8592	190.021
7.52458e+07	7.13194	86.9438	189.207
7.52464e+07	7.13889	87.0285	188.385
7.5247e+07	7.14583	87.1132	187.554
7.52476e+07	7.15278	87.1978	186.715
7.52482e+07	7.15972	87.2825	185.866
7.52488e+07	7.16667	87.3671	185.008
7.52494e+07	7.17361	87.4518	184.142
7.525e+07	7.18056	87.5364	183.265
7.52506e+07	7.1875	87.6211	182.379
7.52512e+07	7.19444	87.7058	181.483
7.52518e+07	7.20139	87.7904	180.577
7.52524e+07	7.20833	87.8751	179.661
7.5253e+07	7.21528	87.9597	178.734
7.52536e+07	7.22222	88.0444	177.796
7.52542e+07	7.22917	88.1291	176.847
7.52548e+07	7.23611	88.2137	175.886
7.52554e+07	7.24306	88.2984	174.914
7.5256e+07	7.25	88.383	173.93
7.52566e+07	7.25694	88.4677	172.934
7.52572e+07	7.26389	88.5523	171.925
7.52578e+07	7.27083	88.637	170.904
7.52584e+07	7.27778	88.7217	169.869
7.5259e+07	7.28472	88.8063	168.821
7.52596e+07	7.29167	88.891	167.759
7.52602e+07	7.29861	88.9756	166.683
7.52608e+07	7.30556	89.0603	165.593
7.52614e+07	7.3125	89.145	164.488
7.5262e+07	7.31944	89.2296	163.368
7.52626e+07	7.32639	89.3143	162.232
7.52632e+07	7.33333	89.3989	161.081
7.52638e+07	7.34028	89.4836	159.913
7.52644e+07	7.34722	89.5682	158.728
7.5265e+07	7.35417	89.6529	157.526
7.52656e+07	7.36111	89.7376	156.306
7.52662e+07	7.36806	89.8222	155.068
7.52668e+07	7.375	89.9069	153.811
7.52674e+07	7.38194	89.9915	152.535
7.5268e+07	7.38889	90.0762	151.271
7.52686e+07	7.39583	90.1609	150.064
7.52692e+07	7.40278	90.2455	148.909
7.52698e+07	7.40972	90.3302	147.805
7.52704e+07	7.41667	90.4148	146.747
7.5271e+07	7.42361	90.4995	145.733
7.52716e+07	7.43056	90.5841	144.759
7.52722e+07	7.4375	90.6688	143.825
7.52728e+07	7.44444	90.7535	142.927
7.52734e+07	7.45139	90.8381	142.063
7.5274e+07	7.45833	90.9228	141.231
7.52746e+07	7.46528	91.0074	140.431
7.52752e+07	7.47222	91.0921	139.659
7.52758e+07	7.47917	91.1767	138.915
7.52764e+07	7.48611	91.2614	138.198
7.5277e+07	7.49306	91.3461	137.505
7.52776e+07	7.5	91.4307	136.836
7.52782e+07	7.50694	91.5154	136.19
7.52788e+07	7.51389	91.6	135.565
7.52794e+07	7.52083	91.6847	134.96
7.528e+07	7.52778	91.7694	134.375
7.52806e+07	7.53472	91.854	133.809
7.52812e+07	7.54167	91.9387	133.261
7.52818e+07	7.54861	92.0233	132.73
7.52824e+07	7.55556	92.108	132.215
7.5283e+07	7.5625	92.1926	131.716
7.52836e+07	7.56944	92.2773	131.232
7.52842e+07	7.57639	92.362	130.762
7.52848e+07	7.58333	92.4466	130.306
7.52854e+07	7.59028	92.5313	129.864
7.5286e+07	7.59722	92.6159	129.435
7.52866e+07	7.60417	92.7006	129.017
7.52872e+07	7.61111	92.7853	128.612
7.52878e+07	7.61806	92.8699	128.218
7.52884e+07	7.625	92.9546	127.835
7.5289e+07	7.63194	93.0392	127.462
7.52896e+07	7.63889	93.1239	127.1
7.52902e+07	7.64583	93.2085	126.747
7.52908e+07	7.65278	93.2932	126.404
7.52914e+07	7.65972	93.3779	126.07
7.5292e+07	7.66667	93.4625	125.745
7.52926e+07	7.67361	93.5472	125.428
7.52932e+07	7.68056	93.6318	125.12
7.52938e+07	7.6875	93.7165	124.82
7.52944e+07	7.69444	93.8011	124.527
7.5295e+07	7.70139	93.8858	124.241
7.52956e+07	7.70833	93.9705	123.963
7.52962e+07	7.71528	94.0551	123.692
7.52968e+07	7.72222	94.1398	123.427
7.52974e+07	7.72917	94.2244	123.169
7.5298e+07	7.73611	94.3091	122.918
7.52986e+07	7.74306	94.3938	122.672
7.52992e+07	7.75	94.4784	122.432
7.52998e+07	7.75694	94.5631	122.198
7.53004e+07	7.76389	94.6477	121.97
7.5301e+07	7.77083	94.7324	121.747
7.53016e+07	7.77778	94.817	121.529
7.53022e+07	7.78472	94.9017	121.316
7.53028e+07	7.79167	94.9864	121.108
7.53034e+07	7.79861	95.071	120.905
7.5304e+07	7.80556	95.1557	120.707
7.53046e+07	7.8125	95.2403	120.513
7.53052e+07	7.81944	95.325	120.323
7.53058e+07	7.82639	95.4097	120.138
7.53064e+07	7.83333	95.4943	119.957
7.5307e+07	7.84028	95.579	119.78
7.53076e+07	7.84722	95.6636	119.607
7.53082e+07	7.85417	95.7483	119.437
7.53088e+07	7.86111	95.8329	119.272
7.53094e+07	7.86806	95.9176	119.109
7.531e+07	7.875	96.0023	118.951
7.53106e+07	7.88194	96.0869	118.795
7.53112e+07	7.88889	96.1716	118.644
7.53118e+07	7.89583	96.2562	118.495
7.53124e+07	7.90278	96.3409	118.349
7.5313e+07	7.90972	96.4255	118.207
7.53136e+07	7.91667	96.5102	118.067
7.53142e+07	7.92361	96.5949	117.93
7.53148e+07	7.93056	96.6795	117.796
7.53154e+07	7.9375	96.7642	117.665
7.5316e+07	7.94444	96.8488	117.537
7.53166e+07	7.95139	96.9335	117.411
7.53172e+07	7.95833	97.0182	117.288
7.53178e+07	7.96528	97.1028	117.167
7.53184e+07	7.97222	97.1875	117.048
7.5319e+07	7.97917	97.2721	116.932
7.53196e+07	7.98611	97.3568	116.819
7.53202e+07	7.99306	97.4414	116.707
7.53208e+07	8	97.5261	116.598
7.53214e+07	8.00694	97.6108	116.491
7.5322e+07	8.01389	97.6954	116.386
7.53226e+07	8.02083	97.7801	116.283
7.53232e+07	8.02778	97.8647	116.182
7.53238e+07	8.03472	97.9494	116.082
7.53244e+07	8.04167	98.0341	115.985
7.5325e+07	8.04861	98.1187	115.89
7.53256e+07	8.05556	98.2034	115.796
7.53262e+07	8.0625	98.288	115.705
7.53268e+07	8.06944	98.3727	115.614
7.53274e+07	8.07639	98.4573	115.526
7.5328e+07	8.08333	98.542	115.439
7.53286e+07	8.09028	98.6267	115.354
7.53292e+07	8.09722	98.7113	115.271
7.53298e+07	8.10417	98.796	115.188
7.53304e+07	8.11111	98.8806	115.108
7.5331e+07	8.11806	98.9653	115.029
7.53316e+07	8.125	99.0499	114.951
7.53322e+07	8.13194	99.1346	114.875
7.53328e+07	8.13889	99.2193	114.8
7.53334e+07	8.14583	99.3039	114.726
7.5334e+07	8.15278	99.3886	114.654
7.53346e+07	8.15972	99.4732	114.583
7.53352e+07	8.16667	99.5579	114.513
7.53358e+07	8.17361	99.6426	114.444
7.53364e+07	8.18056	99.7272	114.377
7.5337e+07	8.1875	99.8119	114.31
7.53376e+07	8.19444	99.8965	114.245
7.53382e+07	8.20139	99.9812	114.181
7.53388e+07	8.20833	100.066	114.118
7.53394e+07	8.21528	100.151	114.056
7.534e+07	8.22222	100.235	113.995
7.53406e+07	8.22917	100.32	113.935
7.53412e+07	8.23611	100.404	113.877
7.53418e+07	8.24306	100.489	113.819
7.53424e+07	8.25	100.574	113.762
7.5343e+07	8.25694	100.658	113.706
7.53436e+07	8.26389	100.743	113.65
7.53442e+07	8.27083	100.828	113.596
7.53448e+07	8.27778	100.912	113.543
7.53454e+07	8.28472	100.997	113.49
7.5346e+07	8.29167	101.082	113.438
7.53466e+07	8.29861	101.166	113.387
7.53472e+07	8.30556	101.251	113.337
7.53478e+07	8.3125	101.336	113.288
7.53484e+07	8.31944	101.42	113.239
7.5349e+07	8.32639	101.505	113.191
7.53496e+07	8.33333	101.59	113.144
7.53502e+07	8.34028	101.674	113.098
7.53508e+07	8.34722	101.759	113.052
7.53514e+07	8.35417	101.844	113.007
7.5352e+07	8.36111	101.928	112.963
7.53526e+07	8.36806	102.013	112.919
7.53532e+07	8.375	102.098	112.876
7.53538e+07	8.38194	102.182	112.834
7.53544e+07	8.38889	102.267	112.792
7.5355e+07	8.39583	102.352	112.751
7.53556e+07	8.40278	102.436	112.71
7.53562e+07	8.40972	102.521	112.67
7.53568e+07	8.41667	102.606	112.63
7.53574e+07	8.42361	102.69	112.591
7.5358e+07	8.43056	102.775	112.553
7.53586e+07	8.4375	102.86	112.515
7.53592e+07	8.44444	102.944	112.478
7.53598e+07	8.45139	103.029	112.441
7.53604e+07	8.45833	103.114	112.405
7.5361e+07	8.46528	103.198	112.369
7.53616e+07	8.47222	103.283	112.333
7.53622e+07	8.47917	103.368	112.299
7.53628e+07	8.48611	103.452	112.264
7.53634e+07	8.49306	103.537	112.23
7.5364e+07	8.5	103.621	112.197
7.53646e+07	8.50694	103.706	112.164
7.53652e+07	8.51389	103.791	112.131
7.53658e+07	8.52083	103.875	112.099
7.53664e+07	8.52778	103.96	112.067
7.5367e+07	8.53472	104.045	112.035
7.53676e+07	8.54167	104.129	112.004
7.53682e+07	8.54861	104.214	111.974
7.53688e+07	8.55556	104.299	111.943
7.53694e+07	8.5625	104.383	111.913
7.537e+07	8.56944	104.468	111.884
7.53706e+07	8.57639	104.553	111.855
7.53712e+07	8.58333	104.637	111.826
7.53718e+07	8.59028	104.722	111.797
7.53724e+07	8.59722	104.807	111.769
7.5373e+07	8.60417	104.891	111.741
7.53736e+07	8.61111	104.976	111.714
7.53742e+07	8.61806	105.061	111.687
7.53748e+07	8.625	105.145	111.66
7.53754e+07	8.63194	105.23	111.633
7.5376e+07	8.63889	105.315	111.607
7.53766e+07	8.64583	105.399	111.581
7.53772e+07	8.65278	105.484	111.555
7.53778e+07	8.65972	105.569	111.53
7.53784e+07	8.66667	105.653	111.505
7.5379e+07	8.67361	105.738	111.48
7.53796e+07	8.68056	105.823	111.455
7.53802e+07	8.6875	105.907	111.431
7.53808e+07	8.69444	105.992	111.407
7.53814e+07	8.70139	106.077	111.383
7.5382e+07	8.70833	106.161	111.359
7.53826e+07	8.71528	106.246	111.336
7.53832e+07	8.72222	106.331	111.313
7.53838e+07	8.72917	106.415	111.29
7.53844e+07	8.73611	106.5	111.267
7.5385e+07	8.74306	106.585	111.245
7.53856e+07	8.75	106.669	111.223
7.53862e+07	8.75694	106.754	111.201
7.53868e+07	8.76389	106.838	111.179
7.53874e+07	8.77083	106.923	111.158
7.5388e+07	8.77778	107.008	111.136
7.53886e+07	8.78472	107.092	111.115
7.53892e+07	8.79167	107.177	111.094
7.53898e+07	8.79861	107.262	111.073
7.53904e+07	8.80556	107.346	111.053
7.5391e+07	8.8125	107.431	111.033
7.53916e+07	8.81944	107.516	111.012
7.53922e+07	8.82639	107.6	110.992
7.53928e+07	8.83333	107.685	110.973
7.53934e+07	8.84028	107.77	110.953
7.5394e+07	8.84722	107.854	110.933
7.53946e+07	8.85417	107.939	110.914
7.53952e+07	8.86111	108.024	110.895
7.53958e+07	8.86806	108.108	110.876
7.53964e+07	8.875	108.193	110.857
7.5397e+07	8.88194	108.278	110.839
7.53976e+07	8.88889	108.362	110.82
7.53982e+07	8.89583	108.447	110.802
7.53988e+07	8.90278	108.532	110.784
7.53994e+07	8.90972	108.616	110.765
7.54e+07	8.91667	108.701	110.748
7.54006e+07	8.92361	108.786	110.73
7.54012e+07	8.93056	108.87	110.712
7.54018e+07	8.9375	108.955	110.695
7.54024e+07	8.94444	109.04	110.677
7.5403e+07	8.95139	109.124	110.66
7.54036e+07	8.95833	109.209	110.643
7.54042e+07	8.96528	109.294	110.626
7.54048e+07	8.97222	109.378	110.609
7.54054e+07	8.97917	109.463	110.593
7.5406e+07	8.98611	109.548	110.576
7.54066e+07	8.99306	109.632	110.559
7.54072e+07	9	109.717	110.543
7.54078e+07	9.00694	109.802	110.527
7.54084e+07	9.01389	109.886	110.511
7.5409e+07	9.02083	109.971	110.495
7.54096e+07	9.02778	110.055	110.479
7.54102e+07	9.03472	110.14	110.463
7.54108e+07	9.04167	110.225	110.447
7.54114e+07	9.04861	110.309	110.432
7.5412e+07	9.05556	110.394	110.416
7.54126e+07	9.0625	110.479	110.401
7.54132e+07	9.06944	110.563	110.386
7.54138e+07	9.07639	110.648	110.371
7.54144e+07	9.08333	110.733	110.355
7.5415e+07	9.09028	110.817	110.341
7.54156e+07	9.09722	110.902	110.326
7.54162e+07	9.10417	110.987	110.311
7.54168e+07	9.11111	111.071	110.296
7.54174e+07	9.11806	111.156	110.282
7.5418e+07	9.125	111.241	110.267
7.54186e+07	9.13194	111.325	110.253
7.54192e+07	9.13889	111.41	110.238
7.54198e+07	9.14583	111.495	110.224
7.54204e+07	9.15278	111.579	110.21
7.5421e+07	9.15972	111.664	110.196
7.54216e+07	9.16667	111.749	110.182
7.54222e+07	9.17361	111.833	110.168
7.54228e+07	9.18056	111.918	110.154
7.54234e+07	9.1875	112.003	110.14
7.5424e+07	9.19444	112.087	110.126
7.54246e+07	9.20139	112.172	110.113
7.54252e+07	9.20833	112.257	110.099
7.54258e+07	9.21528	112.341	110.086
7.54264e+07	9.22222	112.426	110.072
7.5427e+07	9.22917	112.511	110.059
7.54276e+07	9.23611	112.595	110.046
7.54282e+07	9.24306	112.68	110.032
7.54288e+07	9.25	112.765	110.019
7.54294e+07	9.25694	112.849	110.006
7.543e+07	9.26389	112.934	109.993
7.54306e+07	9.27083	113.019	109.98
7.54312e+07	9.27778	113.103	109.967
7.54318e+07	9.28472	113.188	109.955
7.54324e+07	9.29167	113.273	109.942
7.5433e+07	9.29861	113.357	109.929
7.54336e+07	9.30556	113.442	109.916
7.54342e+07	9.3125	113.526	109.904
7.54348e+07	9.31944	113.611	109.891
7.54354e+07	9.32639	113.696	109.879
7.5436e+07	9.33333	113.78	109.866
7.54366e+07	9.34028	113.865	109.854
7.54372e+07	9.34722	113.95	109.842
7.54378e+07	9.35417	114.034	109.83
7.54384e+07	9.36111	114.119	109.817
7.5439e+07	9.36806	114.204	109.805
7.54396e+07	9.375	114.288	109.793
7.54402e+07	9.38194	114.373	109.781
7.54408e+07	9.38889	114.458	109.769
7.54414e+07	9.39583	114.542	109.757
7.5442e+07	9.40278	114.627	109.745
7.54426e+07	9.40972	114.712	109.734
7.54432e+07	9.41667	114.796	109.722
7.54438e+07	9.42361	114.881	109.71
7.54444e+07	9.43056	114.966	109.698
7.5445e+07	9.4375	115.05	109.687
7.54456e+07	9.44444	115.135	109.675
7.54462e+07	9.45139	115.22	109.664
7.54468e+07	9.45833	115.304	109.652
7.54474e+07	9.46528	115.389	109.641
7.5448e+07	9.47222	115.474	109.629
7.54486e+07	9.47917	115.558	109.618
7.54492e+07	9.48611	115.643	109.607
7.54498e+07	9.49306	115.728	109.596
7.54504e+07	9.5	115.812	109.584
7.5451e+07	9.50694	115.897	109.573
7.54516e+07	9.51389	115.982	109.562
7.54522e+07	9.52083	116.066	109.551
7.54528e+07	9.52778	116.151	109.54
7.54534e+07	9.53472	116.236	109.529
7.5454e+07	9.54167	116.32	109.518
7.54546e+07	9.54861	116.405	109.507
7.54552e+07	9.55556	116.49	109.496
7.54558e+07	9.5625	116.574	109.485
7.54564e+07	9.56944	116.659	109.475
7.5457e+07	9.57639	116.743	109.464
7.54576e+07	9.58333	116.828	109.453
7.54582e+07	9.59028	116.913	109.442
7.54588e+07	9.59722	116.997	109.432
7.54594e+07	9.60417	117.082	109.421
7.546e+07	9.61111	117.167	109.411
7.54606e+07	9.61806	117.251	109.4
7.54612e+07	9.625	117.336	109.389
7.54618e+07	9.63194	117.421	109.379
7.54624e+07	9.63889	117.505	109.369
7.5463e+07	9.64583	117.59	109.358
7.54636e+07	9.65278	117.675	109.348
7.54642e+07	9.65972	117.759	109.337
7.54648e+07	9.66667	117.844	109.327
7.54654e+07	9.67361	117.929	109.317
7.5466e+07	9.68056	118.013	109.307
7.54666e+07	9.6875	118.098	109.296
7.54672e+07	9.69444	118.183	109.286
7.54678e+07	9.70139	118.267	109.276
7.54684e+07	9.70833	118.352	109.266
7.5469e+07	9.71528	118.437	109.256
7.54696e+07	9.72222	118.521	109.246
7.54702e+07	9.72917	118.606	109.236
7.54708e+07	9.73611	118.691	109.226
7.54714e+07	9.74306	118.775	109.216
7.5472e+07	9.75	118.86	109.206
7.54726e+07	9.75694	118.945	109.196
7.54732e+07	9.76389	119.029	109.186
7.54738e+07	9.77083	119.114	109.176
7.54744e+07	9.77778	119.199	109.166
7.5475e+07	9.78472	119.283	109.157
7.54756e+07	9.79167	119.368	109.147
7.54762e+07	9.79861	119.453	109.137
7.54768e+07	9.80556	119.537	109.127
7.54774e+07	9.8125	119.622	109.118
7.5478e+07	9.81944	119.707	109.108
7.54786e+07	9.82639	119.791	109.098
7.54792e+07	9.83333	119.876	109.089
7.54798e+07	9.84028	119.96	109.079
7.54804e+07	9.84722	120.045	109.069
7.5481e+07	9.85417	120.13	109.06
7.54816e+07	9.86111	120.214	109.05
7.54822e+07	9.86806	120.299	109.041
7.54828e+07	9.875	120.384	109.031
7.54834e+07	9.88194	120.468	109.022
7.5484e+07	9.88889	120.553	109.013
7.54846e+07	9.89583	120.638	109.003
7.54852e+07	9.90278	120.722	108.994
7.54858e+07	9.90972	120.807	108.984
7.54864e+07	9.91667	120.892	108.975
7.5487e+07	9.92361	120.976	108.966
7.54876e+07	9.93056	121.061	108.957
7.54882e+07	9.9375	121.146	108.947
7.54888e+07	9.94444	121.23	108.938
7.54894e+07	9.95139	121.315	108.929
7.549e+07	9.95833	121.4	108.92
7.54906e+07	9.96528	121.484	108.91
7.54912e+07	9.97222	121.569	108.901
7.54918e+07	9.97917	121.654	108.892
7.54924e+07	9.98611	121.738	108.883
7.5493e+07	9.99306	121.823	108.874
7.54936e+07	10	121.908	108.865
7.54942e+07	10.0069	121.992	108.856
7.54948e+07	10.0139	122.077	108.847
7.54954e+07	10.0208	122.162	108.838
7.5496e+07	10.0278	122.246	108.829
7.54966e+07	10.0347	122.331	108.82
7.54972e+07	10.0417	122.416	108.811
7.54978e+07	10.0486	122.5	108.802
7.54984e+07	10.0556	122.585	108.793
7.5499e+07	10.0625	122.67	108.784
7.54996e+07	10.0694	122.754	108.775
7.55002e+07	10.0764	122.839	108.766
7.55008e+07	10.0833	122.924	108.758
7.55014e+07	10.0903	123.008	108.749
7.5502e+07	10.0972	123.093	108.74
7.55026e+07	10.1042	123.177	108.731
7.55032e+07	10.1111	123.262	108.722
7.55038e+07	10.1181	123.347	108.714
7.55044e+07	10.125	123.431	108.705
7.5505e+07	10.1319	123.516	108.696
7.55056e+07	10.1389	123.601	108.687
7.55062e+07	10.1458	123.685	108.679
7.55068e+07	10.1528	123.77	108.67
7.55074e+07	10.1597	123.855	108.662
7.5508e+07	10.1667	123.939	108.653
7.55086e+07	10.1736	124.024	108.644
7.55092e+07	10.1806	124.109	108.636
7.55098e+07	10.1875	124.193	108.627
7.55104e+07	10.1944	124.278	108.619
7.5511e+07	10.2014	124.363	108.61
7.55116e+07	10.2083	124.447	108.602
7.55122e+07	10.2153	124.532	108.593
7.55128e+07	10.2222	124.617	108.585
7.55134e+07	10.2292	124.701	108.576
7.5514e+07	10.2361	124.786	108.568
7.55146e+07	10.2431	124.871	108.559
7.55152e+07	10.25	124.955	108.551
7.55158e+07	10.2569	125.04	108.542
7.55164e+07	10.2639	125.125	108.534
7.5517e+07	10.2708	125.209	108.526
7.55176e+07	10.2778	125.294	108.517
7.55182e+07	10.2847	125.379	108.509
7.55188e+07	10.2917	125.463	108.501
7.55194e+07	10.2986	125.548	108.492
7.552e+07	10.3056	125.633	108.484
7.55206e+07	10.3125	125.717	108.476
7.55212e+07	10.3194	125.802	108.467
7.55218e+07	10.3264	125.887	108.459
7.55224e+07	10.3333	125.971	108.451
7.5523e+07	10.3403	126.056	108.443
7.55236e+07	10.3472	126.141	108.434
7.55242e+07	10.3542	126.225	108.426
7.55248e+07	10.3611	126.31	108.418
7.55254e+07	10.3681	126.395	108.41
7.5526e+07	10.375	126.479	108.402
7.55266e+07	10.3819	126.564	108.394
7.55272e+07	10.3889	126.648	108.385
7.55278e+07	10.3958	126.733	108.377
7.55284e+07	10.4028	126.818	108.369
7.5529e+07	10.4097	126.902	108.361
7.55296e+07	10.4167	126.987	108.353
7.55302e+07	10.4236	127.072	108.345
7.55308e+07	10.4306	127.156	108.337
7.55314e+07	10.4375	127.241	108.329
7.5532e+07	10.4444	127.326	108.321
7.55326e+07	10.4514	127.41	108.313
7.55332e+07	10.4583	127.495	108.305
7.55338e+07	10.4653	127.58	108.297
7.55344e+07	10.4722	127.664	108.289
7.5535e+07	10.4792	127.749	108.281
7.55356e+07	10.4861	127.834	108.273
7.55362e+07	10.4931	127.918	108.265
7.55368e+07	10.5	128.003	108.257
7.55374e+07	10.5069	128.088	108.249
7.5538e+07	10.5139	128.172	108.242
7.55386e+07	10.5208	128.257	108.234
7.55392e+07	10.5278	128.342	108.226
7.55398e+07	10.5347	128.426	108.218
7.55404e+07	10.5417	128.511	108.21
7.5541e+07	10.5486	128.596	108.202
7.55416e+07	10.5556	128.68	108.195
7.55422e+07	10.5625	128.765	108.187
7.55428e+07	10.5694	128.85	108.179
7.55434e+07	10.5764	128.934	108.171
7.5544e+07	10.5833	129.019	108.163
7.55446e+07	10.5903	129.104	108.156
7.55452e+07	10.5972	129.188	108.148
7.55458e+07	10.6042	129.273	108.14
7.55464e+07	10.6111	129.358	108.133
7.5547e+07	10.6181	129.442	108.125
7.55476e+07	10.625	129.527	108.117
7.55482e+07	10.6319	129.612	108.109
7.55488e+07	10.6389	129.696	108.102
7.55494e+07	10.6458	129.781	108.094
7.555e+07	10.6528	129.865	108.087
7.55506e+07	10.6597	129.95	108.079
7.55512e+07	10.6667	130.035	108.071
7.55518e+07	10.6736	130.119	108.064
7.55524e+07	10.6806	130.204	108.056
7.5553e+07	10.6875	130.289	108.049
7.55536e+07	10.6944	130.373	108.041
7.55542e+07	10.7014	130.458	108.033
7.55548e+07	10.7083	130.543	108.026
7.55554e+07	10.7153	130.627	108.018
7.5556e+07	10.7222	130.712	108.011
7.55566e+07	10.7292	130.797	108.003
7.55572e+07	10.7361	130.881	107.996
7.55578e+07	10.7431	130.966	107.988
7.55584e+07	10.75	131.051	107.981
7.5559e+07	10.7569	131.135	107.973
7.55596e+07	10.7639	131.22	107.966
7.55602e+07	10.7708	131.305	107.958
7.55608e+07	10.7778	131.389	107.951
7.55614e+07	10.7847	131.474	107.944
7.5562e+07	10.7917	131.559	107.936
7.55626e+07	10.7986	131.643	107.929
7.55632e+07	10.8056	131.728	107.921
7.55638e+07	10.8125	131.813	107.914
7.55644e+07	10.8194	131.897	107.907
7.5565e+07	10.8264	131.982	107.899
7.55656e+07	10.8333	132.067	107.892
7.55662e+07	10.8403	132.151	107.885
7.55668e+07	10.8472	132.236	107.877
7.55674e+07	10.8542	132.321	107.87
7.5568e+07	10.8611	132.405	107.863
7.55686e+07	10.8681	132.49	107.855
7.55692e+07	10.875	132.575	107.848
7.55698e+07	10.8819	132.659	107.841
7.55704e+07	10.8889	132.744	107.833
7.5571e+07	10.8958	132.829	107.826
7.55716e+07	10.9028	132.913	107.819
7.55722e+07	10.9097	132.998	107.812
7.55728e+07	10.9167	133.082	107.804
7.55734e+07	10.9236	133.167	107.797
7.5574e+07	10.9306	133.252	107.79
7.55746e+07	10.9375	133.336	107.783
7.55752e+07	10.9444	133.421	107.776
7.55758e+07	10.9514	133.506	107.768
7.55764e+07	10.9583	133.59	107.761
7.5577e+07	10.9653	133.675	107.754
7.55776e+07	10.9722	133.76	107.747
7.55782e+07	10.9792	133.844	107.74
7.55788e+07	10.9861	133.929	107.733
7.55794e+07	10.9931	134.014	107.726
7.558e+07	11	134.098	107.718
7.55806e+07	11.0069	134.183	107.711
7.55812e+07	11.0139	134.268	107.704
7.55818e+07	11.0208	134.352	107.697
7.55824e+07	11.0278	134.437	107.69
7.5583e+07	11.0347	134.522	107.683
7.55836e+07	11.0417	134.606	107.676
7.55842e+07	11.0486	134.691	107.669
7.55848e+07	11.0556	134.776	107.662
7.55854e+07	11.0625	134.86	107.655
7.5586e+07	11.0694	134.945	107.648
7.55866e+07	11.0764	135.03	107.641
7.55872e+07	11.0833	135.114	107.634
7.55878e+07	11.0903	135.199	107.627
7.55884e+07	11.0972	135.284	107.62
7.5589e+07	11.1042	135.368	107.613
7.55896e+07	11.1111	135.453	107.606
7.55902e+07	11.1181	135.538	107.599
7.55908e+07	11.125	135.622	107.592
7.55914e+07	11.1319	135.707	107.585
7.5592e+07	11.1389	135.792	107.578
7.55926e+07	11.1458	135.876	107.571
7.55932e+07	11.1528	135.961	107.564
7.55938e+07	11.1597	136.046	107.557
7.55944e+07	11.1667	136.13	107.55
7.5595e+07	11.1736	136.215	107.544
7.55956e+07	11.1806	136.3	107.537
7.55962e+07	11.1875	136.384	107.53
7.55968e+07	11.1944	136.469	107.523
7.55974e+07	11.2014	136.553	107.516
7.5598e+07	11.2083	136.638	107.509
7.55986e+07	11.2153	136.723	107.502
7.55992e+07	11.2222	136.807	107.496
7.55998e+07	11.2292	136.892	107.489
7.56004e+07	11.2361	136.977	107.482
7.5601e+07	11.2431	137.061	107.475
7.56016e+07	11.25	137.146	107.468
7.56022e+07	11.2569	137.231	107.462
7.56028e+07	11.2639	137.315	107.455
7.56034e+07	11.2708	137.4	107.448
7.5604e+07	11.2778	137.485	107.441
7.56046e+07	11.2847	137.569	107.435
7.56052e+07	11.2917	137.654	107.428
7.56058e+07	11.2986	137.739	107.421
7.56064e+07	11.3056	137.823	107.414
7.5607e+07	11.3125	137.908	107.408
7.56076e+07	11.3194	137.993	107.401
7.56082e+07	11.3264	138.077	107.394
7.56088e+07	11.3333	138.162	107.388
7.56094e+07	11.3403	138.247	107.381
7.561e+07	11.3472	138.331	107.374
7.56106e+07	11.3542	138.416	107.368
7.56112e+07	11.3611	138.501	107.361
7.56118e+07	11.3681	138.585	107.354
7.56124e+07	11.375	138.67	107.348
7.5613e+07	11.3819	138.755	107.341
7.56136e+07	11.3889	138.839	107.334
7.56142e+07	11.3958	138.924	107.328
7.56148e+07	11.4028	139.009	107.321
7.56154e+07	11.4097	139.093	107.314
7.5616e+07	11.4167	139.178	107.308
7.56166e+07	11.4236	139.263	107.301
7.56172e+07	11.4306	139.347	107.295
7.56178e+07	11.4375	139.432	107.288
7.56184e+07	11.4444	139.517	107.282
7.5619e+07	11.4514	139.601	107.275
7.56196e+07	11.4583	139.686	107.268
7.56202e+07	11.4653	139.77	107.262
7.56208e+07	11.4722	139.855	107.255
7.56214e+07	11.4792	139.94	107.249
7.5622e+07	11.4861	140.024	107.242
7.56226e+07	11.4931	140.109	107.236
7.56232e+07	11.5	140.194	107.229
7.56238e+07	11.5069	140.278	107.223
7.56244e+07	11.5139	140.363	107.216
7.5625e+07	11.5208	140.448	107.21
7.56256e+07	11.5278	140.532	107.203
7.56262e+07	11.5347	140.617	107.197
7.56268e+07	11.5417	140.702	107.19
7.56274e+07	11.5486	140.786	107.184
7.5628e+07	11.5556	140.871	107.178
7.56286e+07	11.5625	140.956	107.171
7.56292e+07	11.5694	141.04	107.165
7.56298e+07	11.5764	141.125	107.158
7.56304e+07	11.5833	141.21	107.152
7.5631e+07	11.5903	141.294	107.145
7.56316e+07	11.5972	141.379	107.139
7.56322e+07	11.6042	141.464	107.133
7.56328e+07	11.6111	141.548	107.126
7.56334e+07	11.6181	141.633	107.12
7.5634e+07	11.625	141.718	107.114
7.56346e+07	11.6319	141.802	107.107
7.56352e+07	11.6389	141.887	107.101
7.56358e+07	11.6458	141.972	107.094
7.56364e+07	11.6528	142.056	107.088
7.5637e+07	11.6597	142.141	107.082
7.56376e+07	11.6667	142.226	107.075
7.56382e+07	11.6736	142.31	107.069
7.56388e+07	11.6806	142.395	107.063
7.56394e+07	11.6875	142.48	107.056
7.564e+07	11.6944	142.564	107.05
7.56406e+07	11.7014	142.649	107.044
7.56412e+07	11.7083	142.734	107.038
7.56418e+07	11.7153	142.818	107.031
7.56424e+07	11.7222	142.903	107.025
7.5643e+07	11.7292	142.987	107.019
7.56436e+07	11.7361	143.072	107.013
7.56442e+07	11.7431	143.157	107.006
7.56448e+07	11.75	143.241	107
7.56454e+07	11.7569	143.326	106.994
7.5646e+07	11.7639	143.411	106.988
7.56466e+07	11.7708	143.495	106.981
7.56472e+07	11.7778	143.58	106.975
7.56478e+07	11.7847	143.665	106.969
7.56484e+07	11.7917	143.749	106.963
7.5649e+07	11.7986	143.834	106.957
7.56496e+07	11.8056	143.919	106.95
7.56502e+07	11.8125	144.003	106.944
7.56508e+07	11.8194	144.088	106.938
7.56514e+07	11.8264	144.173	106.932
7.5652e+07	11.8333	144.257	106.926
7.56526e+07	11.8403	144.342	106.919
7.56532e+07	11.8472	144.427	106.913
7.56538e+07	11.8542	144.511	106.907
7.56544e+07	11.8611	144.596	106.901
7.5655e+07	11.8681	144.681	106.895
7.56556e+07	11.875	144.765	106.889
7.56562e+07	11.8819	144.85	106.883
7.56568e+07	11.8889	144.935	106.877
7.56574e+07	11.8958	145.019	106.87
7.5658e+07	11.9028	145.104	106.864
7.56586e+07	11.9097	145.189	106.858
7.56592e+07	11.9167	145.273	106.852
7.56598e+07	11.9236	145.358	106.846
7.56604e+07	11.9306	145.443	106.84
7.5661e+07	11.9375	145.527	106.834
7.56616e+07	11.9444	145.612	106.828
7.56622e+07	11.9514	145.697	106.822
7.56628e+07	11.9583	145.781	106.816
7.56634e+07	11.9653	145.866	106.81
7.5664e+07	11.9722	145.951	106.804
7.56646e+07	11.9792	146.035	106.798
7.56652e+07	11.9861	146.12	106.792
7.56658e+07	11.9931	146.204	106.786
7.56664e+07	12	146.289	106.78
7.5667e+07	12.0069	146.374	106.774
7.56676e+07	12.0139	146.458	106.768
7.56682e+07	12.0208	146.543	106.762
7.56688e+07	12.0278	146.628	106.756
7.56694e+07	12.0347	146.712	106.75
7.567e+07	12.0417	146.797	106.744
7.56706e+07	12.0486	146.882	106.738
7.56712e+07	12.0556	146.966	106.732
7.56718e+07	12.0625	147.051	106.726
7.56724e+07	12.0694	147.136	106.72
7.5673e+07	12.0764	147.22	106.714
7.56736e+07	12.0833	147.305	106.708
7.56742e+07	12.0903	147.39	106.702
7.56748e+07	12.0972	147.474	106.696
7.56754e+07	12.1042	147.559	106.69
7.5676e+07	12.1111	147.644	106.684
7.56766e+07	12.1181	147.728	106.678
7.56772e+07	12.125	147.813	106.672
7.56778e+07	12.1319	147.898	106.667
7.56784e+07	12.1389	147.982	106.661
7.5679e+07	12.1458	148.067	106.655
7.56796e+07	12.1528	148.152	106.649
7.56802e+07	12.1597	148.236	106.643
7.56808e+07	12.1667	148.321	106.637
7.56814e+07	12.1736	148.406	106.631
7.5682e+07	12.1806	148.49	106.625
7.56826e+07	12.1875	148.575	106.62
7.56832e+07	12.1944	148.66	106.614
7.56838e+07	12.2014	148.744	106.608
7.56844e+07	12.2083	148.829	106.602
7.5685e+07	12.2153	148.914	106.596
7.56856e+07	12.2222	148.998	106.59
7.56862e+07	12.2292	149.083	106.585
7.56868e+07	12.2361	149.168	106.579
7.56874e+07	12.2431	149.252	106.573
7.5688e+07	12.25	149.337	106.567
7.56886e+07	12.2569	149.422	106.561
7.56892e+07	12.2639	149.506	106.556
7.56898e+07	12.2708	149.591	106.55
7.56904e+07	12.2778	149.675	106.544
7.5691e+07	12.2847	149.76	106.538
7.56916e+07	12.2917	149.845	106.533
7.56922e+07	12.2986	149.929	106.527
7.56928e+07	12.3056	150.014	106.521
7.56934e+07	12.3125	150.099	106.515
7.5694e+07	12.3194	150.183	106.51
7.56946e+07	12.3264	150.268	106.504
7.56952e+07	12.3333	150.353	106.498
7.56958e+07	12.3403	150.437	106.492
7.56964e+07	12.3472	150.522	106.487
7.5697e+07	12.3542	150.607	106.481
7.56976e+07	12.3611	150.691	106.475
7.56982e+07	12.3681	150.776	106.47
7.56988e+07	12.375	150.861	106.464
7.56994e+07	12.3819	150.945	106.458
7.57e+07	12.3889	151.03	106.452
7.57006e+07	12.3958	151.115	106.447
7.57012e+07	12.4028	151.199	106.441
7.57018e+07	12.4097	151.284	106.435
7.57024e+07	12.4167	151.369	106.43
7.5703e+07	12.4236	151.453	106.424
7.57036e+07	12.4306	151.538	106.418
7.57042e+07	12.4375	151.623	106.413
7.57048e+07	12.4444	151.707	106.407
7.57054e+07	12.4514	151.792	106.402
7.5706e+07	12.4583	151.877	106.396
7.57066e+07	12.4653	151.961	106.39
7.57072e+07	12.4722	152.046	106.385
7.57078e+07	12.4792	152.131	106.379
7.57084e+07	12.4861	152.215	106.373
7.5709e+07	12.4931	152.3	106.368
7.57096e+07	12.5	152.385	106.362
7.57102e+07	12.5069	152.469	106.357
7.57108e+07	12.5139	152.554	106.351
7.57114e+07	12.5208	152.639	106.345
7.5712e+07	12.5278	152.723	106.34
7.57126e+07	12.5347	152.808	106.334
7.57132e+07	12.5417	152.892	106.329
7.57138e+07	12.5486	152.977	106.323
7.57144e+07	12.5556	153.062	106.318
7.5715e+07	12.5625	153.146	106.312
7.57156e+07	12.5694	153.231	106.307
7.57162e+07	12.5764	153.316	106.301
7.57168e+07	12.5833	153.4	106.295
7.57174e+07	12.5903	153.485	106.29
7.5718e+07	12.5972	153.57	106.284
7.57186e+07	12.6042	153.654	106.279
7.57192e+07	12.6111	153.739	106.273
7.57198e+07	12.6181	153.824	106.268
7.57204e+07	12.625	153.908	106.262
7.5721e+07	12.6319	153.993	106.257
7.57216e+07	12.6389	154.078	106.251
7.57222e+07	12.6458	154.162	106.246
7.57228e+07	12.6528	154.247	106.24
7.57234e+07	12.6597	154.332	106.235
7.5724e+07	12.6667	154.416	106.229
7.57246e+07	12.6736	154.501	106.224
7.57252e+07	12.6806	154.586	106.218
7.57258e+07	12.6875	154.67	106.213
7.57264e+07	12.6944	154.755	106.208
7.5727e+07	12.7014	154.84	106.202
7.57276e+07	12.7083	154.924	106.197
7.57282e+07	12.7153	155.009	106.191
7.57288e+07	12.7222	155.094	106.186
7.57294e+07	12.7292	155.178	106.18
7.573e+07	12.7361	155.263	106.175
7.57306e+07	12.7431	155.348	106.17
7.57312e+07	12.75	155.432	106.164
7.57318e+07	12.7569	155.517	106.159
7.57324e+07	12.7639	155.602	106.153
7.5733e+07	12.7708	155.686	106.148
7.57336e+07	12.7778	155.771	106.142
7.57342e+07	12.7847	155.856	106.137
7.57348e+07	12.7917	155.94	106.132
7.57354e+07	12.7986	156.025	106.126
7.5736e+07	12.8056	156.109	106.121
7.57366e+07	12.8125	156.194	106.116
7.57372e+07	12.8194	156.279	106.11
7.57378e+07	12.8264	156.363	106.105
7.57384e+07	12.8333	156.448	106.1
7.5739e+07	12.8403	156.533	106.094
7.57396e+07	12.8472	156.617	106.089
7.57402e+07	12.8542	156.702	106.084
7.57408e+07	12.8611	156.787	106.078
7.57414e+07	12.8681	156.871	106.073
7.5742e+07	12.875	156.956	106.068
7.57426e+07	12.8819	157.041	106.062
7.57432e+07	12.8889	157.125	106.057
7.57438e+07	12.8958	157.21	106.052
7.57444e+07	12.9028	157.295	106.046
7.5745e+07	12.9097	157.379	106.041
7.57456e+07	12.9167	157.464	106.036
7.57462e+07	12.9236	157.549	106.031
7.57468e+07	12.9306	157.633	106.025
7.57474e+07	12.9375	157.718	106.02
7.5748e+07	12.9444	157.803	106.015
7.57486e+07	12.9514	157.887	106.01
7.57492e+07	12.9583	157.972	106.004
7.57498e+07	12.9653	158.057	105.999
7.57504e+07	12.9722	158.141	105.994
7.5751e+07	12.9792	158.226	105.989
7.57516e+07	12.9861	158.311	105.984
7.57522e+07	12.9931	158.395	105.978
7.57528e+07	13	158.48	105.973
7.57534e+07	13.0069	158.565	105.968
7.5754e+07	13.0139	158.649	105.963
7.57546e+07	13.0208	158.734	105.958
7.57552e+07	13.0278	158.819	105.952
7.57558e+07	13.0347	158.903	105.947
7.57564e+07	13.0417	158.988	105.942
7.5757e+07	13.0486	159.073	105.937
7.57576e+07	13.0556	159.157	105.932
7.57582e+07	13.0625	159.242	105.927
7.57588e+07	13.0694	159.326	105.921
7.57594e+07	13.0764	159.411	105.916
7.576e+07	13.0833	159.496	105.911
7.57606e+07	13.0903	159.58	105.906
7.57612e+07	13.0972	159.665	105.901
7.57618e+07	13.1042	159.75	105.896
7.57624e+07	13.1111	159.834	105.891
7.5763e+07	13.1181	159.919	105.886
7.57636e+07	13.125	160.004	105.88
7.57642e+07	13.1319	160.088	105.875
7.57648e+07	13.1389	160.173	105.87
7.57654e+07	13.1458	160.258	105.865
7.5766e+07	13.1528	160.342	105.86
7.57666e+07	13.1597	160.427	105.855
7.57672e+07	13.1667	160.512	105.85
7.57678e+07	13.1736	160.596	105.845
7.57684e+07	13.1806	160.681	105.84
7.5769e+07	13.1875	160.766	105.835
7.57696e+07	13.1944	160.85	105.83
7.57702e+07	13.2014	160.935	105.825
7.57708e+07	13.2083	161.02	105.82
7.57714e+07	13.2153	161.104	105.815
7.5772e+07	13.2222	161.189	105.81
7.57726e+07	13.2292	161.274	105.805
7.57732e+07	13.2361	161.358	105.8
7.57738e+07	13.2431	161.443	105.795
7.57744e+07	13.25	161.528	105.79
7.5775e+07	13.2569	161.612	105.785
7.57756e+07	13.2639	161.697	105.78
7.57762e+07	13.2708	161.782	105.775
7.57768e+07	13.2778	161.866	105.77
7.57774e+07	13.2847	161.951	105.765
7.5778e+07	13.2917	162.036	105.76
7.57786e+07	13.2986	162.12	105.755
7.57792e+07	13.3056	162.205	105.75
7.57798e+07	13.3125	162.29	105.745
7.57804e+07	13.3194	162.374	105.74
7.5781e+07	13.3264	162.459	105.735
7.57816e+07	13.3333	162.544	105.73
7.57822e+07	13.3403	162.628	105.725
7.57828e+07	13.3472	162.713	105.72
7.57834e+07	13.3542	162.797	105.715
7.5784e+07	13.3611	162.882	105.71
7.57846e+07	13.3681	162.967	105.705
7.57852e+07	13.375	163.051	105.7
7.57858e+07	13.3819	163.136	105.695
7.57864e+07	13.3889	163.221	105.69
7.5787e+07	13.3958	163.305	105.685
7.57876e+07	13.4028	163.39	105.68
7.57882e+07	13.4097	163.475	105.676
7.57888e+07	13.4167	163.559	105.671
7.57894e+07	13.4236	163.644	105.666
7.579e+07	13.4306	163.729	105.661
7.57906e+07	13.4375	163.813	105.656
7.57912e+07	13.4444	163.898	105.651
7.57918e+07	13.4514	163.983	105.646
7.57924e+07	13.4583	164.067	105.641
7.5793e+07	13.4653	164.152	105.636
7.57936e+07	13.4722	164.237	105.632
7.57942e+07	13.4792	164.321	105.627
7.57948e+07	13.4861	164.406	105.622
7.57954e+07	13.4931	164.491	105.617
7.5796e+07	13.5	164.575	105.612
7.57966e+07	13.5069	164.66	105.607
7.57972e+07	13.5139	164.745	105.603
7.57978e+07	13.5208	164.829	105.598
7.57984e+07	13.5278	164.914	105.593
7.5799e+07	13.5347	164.999	105.588
7.57996e+07	13.5417	165.083	105.583
7.58002e+07	13.5486	165.168	105.578
7.58008e+07	13.5556	165.253	105.574
7.58014e+07	13.5625	165.337	105.569
7.5802e+07	13.5694	165.422	105.564
7.58026e+07	13.5764	165.507	105.559
7.58032e+07	13.5833	165.591	105.554
7.58038e+07	13.5903	165.676	105.55
7.58044e+07	13.5972	165.761	105.545
7.5805e+07	13.6042	165.845	105.54
7.58056e+07	13.6111	165.93	105.535
7.58062e+07	13.6181	166.014	105.53
7.58068e+07	13.625	166.099	105.526
7.58074e+07	13.6319	166.184	105.521
7.5808e+07	13.6389	166.268	105.516
7.58086e+07	13.6458	166.353	105.511
7.58092e+07	13.6528	166.438	105.507
7.58098e+07	13.6597	166.522	105.502
7.58104e+07	13.6667	166.607	105.497
7.5811e+07	13.6736	166.692	105.492
7.58116e+07	13.6806	166.776	105.488
7.58122e+07	13.6875	166.861	105.483
7.58128e+07	13.6944	166.946	105.478
7.58134e+07	13.7014	167.03	105.473
7.5814e+07	13.7083	167.115	105.469
7.58146e+07	13.7153	167.2	105.464
7.58152e+07	13.7222	167.284	105.459
7.58158e+07	13.7292	167.369	105.454
7.58164e+07	13.7361	167.454	105.45
7.5817e+07	13.7431	167.538	105.445
7.58176e+07	13.75	167.623	105.44
7.58182e+07	13.7569	167.708	105.436
7.58188e+07	13.7639	167.792	105.431
7.58194e+07	13.7708	167.877	105.426
7.582e+07	13.7778	167.962	105.422
7.58206e+07	13.7847	168.046	105.417
7.58212e+07	13.7917	168.131	105.412
7.58218e+07	13.7986	168.216	105.407
7.58224e+07	13.8056	168.3	105.403
7.5823e+07	13.8125	168.385	105.398
7.58236e+07	13.8194	168.47	105.393
7.58242e+07	13.8264	168.554	105.389
7.58248e+07	13.8333	168.639	105.384
7.58254e+07	13.8403	168.724	105.379
7.5826e+07	13.8472	168.808	105.375
7.58266e+07	13.8542	168.893	105.37
7.58272e+07	13.8611	168.978	105.366
7.58278e+07	13.8681	169.062	105.361
7.58284e+07	13.875	169.147	105.356
[truncated: 2,255 more rows]

## Sheet: Figure3-b
Time, s		Longitude	Latitude 30	29.5139	Test
74629620	0	0	387.862		Longitude	Reference
74630220	0.00694444	0.0846597	387.873		0	373.1
74630820	0.0138889	0.169319	387.865		15	369.5
74631420	0.0208333	0.253979	387.849		30	357.1
74632020	0.0277778	0.338639	387.829		45	336.9
74632620	0.0347222	0.423298	387.807		60	307.9
74633220	0.0416667	0.507958	387.785		75	257.2
74633820	0.0486111	0.592618	387.761		90	158
74634420	0.0555556	0.677277	387.738		105	115.3
74635020	0.0625	0.761937	387.714		120	109
74635620	0.0694444	0.846597	387.691		135	105.9
74636220	0.0763889	0.931256	387.667		150	103.7
74636820	0.0833333	1.01592	387.644		165	101.5
74637420	0.0902778	1.10058	387.62		180	99.37
74638020	0.0972222	1.18524	387.596		195	97.93
74638620	0.104167	1.2699	387.573		210	96.48
74639220	0.111111	1.35455	387.549		225	95.75
74639820	0.118056	1.43921	387.525		240	94.31
74640420	0.125	1.52387	387.502		255	93.58
74641020	0.131944	1.60853	387.478		270	129.1
74641620	0.138889	1.69319	387.454		285	251.4
74642220	0.145833	1.77785	387.431		300	303.6
74642820	0.152778	1.86251	387.407		315	336.9
74643420	0.159722	1.94717	387.383		330	357.1
74644020	0.166667	2.03183	387.36		345	368.7
74644620	0.173611	2.11649	387.336		360	373.1
74645220	0.180556	2.20115	387.312
74645820	0.1875	2.28581	387.288
74646420	0.194444	2.37047	387.265
74647020	0.201389	2.45513	387.241
74647620	0.208333	2.53979	387.217
74648220	0.215278	2.62445	387.194
74648820	0.222222	2.70911	387.17
74649420	0.229167	2.79377	387.146
74650020	0.236111	2.87843	387.122
74650620	0.243056	2.96309	387.099
74651220	0.25	3.04775	387.075
74651820	0.256944	3.13241	387.051
74652420	0.263889	3.21707	387.027
74653020	0.270833	3.30173	387.004
74653620	0.277778	3.38639	386.98
74654220	0.284722	3.47105	386.956
74654820	0.291667	3.55571	386.932
74655420	0.298611	3.64037	386.909
74656020	0.305556	3.72503	386.885
7.46566e+07	0.3125	3.80969	386.861
7.46572e+07	0.319444	3.89434	386.837
7.46578e+07	0.326389	3.979	386.813
7.46584e+07	0.333333	4.06366	386.79
7.4659e+07	0.340278	4.14832	386.766
7.46596e+07	0.347222	4.23298	386.742
7.46602e+07	0.354167	4.31764	386.718
74660820	0.361111	4.4023	386.694
74661420	0.368056	4.48696	386.67
74662020	0.375	4.57162	386.647
74662620	0.381944	4.65628	386.623
74663220	0.388889	4.74094	386.599
74663820	0.395833	4.8256	386.575
74664420	0.402778	4.91026	386.551
7.4665e+07	0.409722	4.99492	386.527
7.46656e+07	0.416667	5.07958	386.503
7.46662e+07	0.423611	5.16424	386.48
7.46668e+07	0.430556	5.2489	386.456
7.46674e+07	0.4375	5.33356	386.432
7.4668e+07	0.444444	5.41822	386.408
7.46686e+07	0.451389	5.50288	386.384
7.46692e+07	0.458333	5.58754	386.36
7.46698e+07	0.465278	5.6722	386.336
7.46704e+07	0.472222	5.75686	386.312
7.4671e+07	0.479167	5.84152	386.288
7.46716e+07	0.486111	5.92618	386.265
7.46722e+07	0.493056	6.01084	386.241
7.46728e+07	0.5	6.0955	386.217
7.46734e+07	0.506944	6.18016	386.193
7.4674e+07	0.513889	6.26482	386.169
7.46746e+07	0.520833	6.34948	386.145
7.46752e+07	0.527778	6.43413	386.121
7.46758e+07	0.534722	6.51879	386.097
7.46764e+07	0.541667	6.60345	386.073
7.4677e+07	0.548611	6.68811	386.049
7.46776e+07	0.555556	6.77277	386.025
7.46782e+07	0.5625	6.85743	386.001
7.46788e+07	0.569444	6.94209	385.977
7.46794e+07	0.576389	7.02675	385.953
7.468e+07	0.583333	7.11141	385.929
7.46806e+07	0.590278	7.19607	385.905
7.46812e+07	0.597222	7.28073	385.881
7.46818e+07	0.604167	7.36539	385.857
7.46824e+07	0.611111	7.45005	385.833
7.4683e+07	0.618056	7.53471	385.809
7.46836e+07	0.625	7.61937	385.785
7.46842e+07	0.631944	7.70403	385.761
7.46848e+07	0.638889	7.78869	385.737
7.46854e+07	0.645833	7.87335	385.713
7.4686e+07	0.652778	7.95801	385.689
7.46866e+07	0.659722	8.04267	385.665
7.46872e+07	0.666667	8.12733	385.641
7.46878e+07	0.673611	8.21199	385.617
7.46884e+07	0.680556	8.29665	385.593
7.4689e+07	0.6875	8.38131	385.569
7.46896e+07	0.694444	8.46597	385.545
7.46902e+07	0.701389	8.55063	385.521
7.46908e+07	0.708333	8.63529	385.497
7.46914e+07	0.715278	8.71995	385.473
7.4692e+07	0.722222	8.80461	385.448
7.46926e+07	0.729167	8.88927	385.424
7.46932e+07	0.736111	8.97392	385.4
7.46938e+07	0.743056	9.05858	385.376
7.46944e+07	0.75	9.14324	385.352
7.4695e+07	0.756944	9.2279	385.328
7.46956e+07	0.763889	9.31256	385.304
7.46962e+07	0.770833	9.39722	385.28
7.46968e+07	0.777778	9.48188	385.256
7.46974e+07	0.784722	9.56654	385.232
7.4698e+07	0.791667	9.6512	385.207
7.46986e+07	0.798611	9.73586	385.183
7.46992e+07	0.805556	9.82052	385.159
7.46998e+07	0.8125	9.90518	385.135
7.47004e+07	0.819444	9.98984	385.111
7.4701e+07	0.826389	10.0745	385.087
7.47016e+07	0.833333	10.1592	385.062
7.47022e+07	0.840278	10.2438	385.038
7.47028e+07	0.847222	10.3285	385.014
7.47034e+07	0.854167	10.4131	384.99
7.4704e+07	0.861111	10.4978	384.966
7.47046e+07	0.868056	10.5825	384.942
7.47052e+07	0.875	10.6671	384.917
7.47058e+07	0.881944	10.7518	384.893
7.47064e+07	0.888889	10.8364	384.869
7.4707e+07	0.895833	10.9211	384.845
7.47076e+07	0.902778	11.0058	384.821
7.47082e+07	0.909722	11.0904	384.796
7.47088e+07	0.916667	11.1751	384.772
7.47094e+07	0.923611	11.2597	384.748
7.471e+07	0.930556	11.3444	384.724
7.47106e+07	0.9375	11.4291	384.699
7.47112e+07	0.944444	11.5137	384.675
7.47118e+07	0.951389	11.5984	384.651
7.47124e+07	0.958333	11.683	384.627
7.4713e+07	0.965278	11.7677	384.602
7.47136e+07	0.972222	11.8524	384.578
7.47142e+07	0.979167	11.937	384.554
7.47148e+07	0.986111	12.0217	384.53
7.47154e+07	0.993056	12.1063	384.505
7.4716e+07	1	12.191	384.481
7.47166e+07	1.00694	12.2757	384.457
7.47172e+07	1.01389	12.3603	384.432
7.47178e+07	1.02083	12.445	384.408
7.47184e+07	1.02778	12.5296	384.384
7.4719e+07	1.03472	12.6143	384.36
7.47196e+07	1.04167	12.699	384.335
7.47202e+07	1.04861	12.7836	384.311
7.47208e+07	1.05556	12.8683	384.287
7.47214e+07	1.0625	12.9529	384.262
7.4722e+07	1.06944	13.0376	384.238
7.47226e+07	1.07639	13.1222	384.214
7.47232e+07	1.08333	13.2069	384.189
7.47238e+07	1.09028	13.2916	384.165
7.47244e+07	1.09722	13.3762	384.141
7.4725e+07	1.10417	13.4609	384.116
7.47256e+07	1.11111	13.5455	384.092
7.47262e+07	1.11806	13.6302	384.068
7.47268e+07	1.125	13.7149	384.043
7.47274e+07	1.13194	13.7995	384.019
7.4728e+07	1.13889	13.8842	383.994
7.47286e+07	1.14583	13.9688	383.97
7.47292e+07	1.15278	14.0535	383.946
7.47298e+07	1.15972	14.1382	383.921
7.47304e+07	1.16667	14.2228	383.897
7.4731e+07	1.17361	14.3075	383.872
7.47316e+07	1.18056	14.3921	383.848
7.47322e+07	1.1875	14.4768	383.824
7.47328e+07	1.19444	14.5615	383.799
7.47334e+07	1.20139	14.6461	383.775
7.4734e+07	1.20833	14.7308	383.75
7.47346e+07	1.21528	14.8154	383.726
7.47352e+07	1.22222	14.9001	383.701
7.47358e+07	1.22917	14.9848	383.677
7.47364e+07	1.23611	15.0694	383.653
7.4737e+07	1.24306	15.1541	383.628
7.47376e+07	1.25	15.2387	383.604
7.47382e+07	1.25694	15.3234	383.579
7.47388e+07	1.26389	15.4081	383.555
7.47394e+07	1.27083	15.4927	383.53
7.474e+07	1.27778	15.5774	383.506
7.47406e+07	1.28472	15.662	383.481
7.47412e+07	1.29167	15.7467	383.457
7.47418e+07	1.29861	15.8314	383.432
7.47424e+07	1.30556	15.916	383.408
7.4743e+07	1.3125	16.0007	383.383
7.47436e+07	1.31944	16.0853	383.359
7.47442e+07	1.32639	16.17	383.334
7.47448e+07	1.33333	16.2547	383.31
7.47454e+07	1.34028	16.3393	383.285
7.4746e+07	1.34722	16.424	383.261
7.47466e+07	1.35417	16.5086	383.236
7.47472e+07	1.36111	16.5933	383.212
7.47478e+07	1.36806	16.678	383.187
7.47484e+07	1.375	16.7626	383.162
7.4749e+07	1.38194	16.8473	383.138
7.47496e+07	1.38889	16.9319	383.113
7.47502e+07	1.39583	17.0166	383.089
7.47508e+07	1.40278	17.1013	383.064
7.47514e+07	1.40972	17.1859	383.04
7.4752e+07	1.41667	17.2706	383.015
7.47526e+07	1.42361	17.3552	382.99
7.47532e+07	1.43056	17.4399	382.966
7.47538e+07	1.4375	17.5246	382.941
7.47544e+07	1.44444	17.6092	382.917
7.4755e+07	1.45139	17.6939	382.892
7.47556e+07	1.45833	17.7785	382.867
7.47562e+07	1.46528	17.8632	382.843
7.47568e+07	1.47222	17.9478	382.818
7.47574e+07	1.47917	18.0325	382.791
7.4758e+07	1.48611	18.1172	382.743
7.47586e+07	1.49306	18.2018	382.681
7.47592e+07	1.5	18.2865	382.612
7.47598e+07	1.50694	18.3711	382.54
7.47604e+07	1.51389	18.4558	382.465
7.4761e+07	1.52083	18.5405	382.39
7.47616e+07	1.52778	18.6251	382.315
7.47622e+07	1.53472	18.7098	382.239
7.47628e+07	1.54167	18.7944	382.163
7.47634e+07	1.54861	18.8791	382.087
7.4764e+07	1.55556	18.9638	382.011
7.47646e+07	1.5625	19.0484	381.935
7.47652e+07	1.56944	19.1331	381.858
7.47658e+07	1.57639	19.2177	381.782
7.47664e+07	1.58333	19.3024	381.706
7.4767e+07	1.59028	19.3871	381.63
7.47676e+07	1.59722	19.4717	381.553
7.47682e+07	1.60417	19.5564	381.477
7.47688e+07	1.61111	19.641	381.4
7.47694e+07	1.61806	19.7257	381.324
7.477e+07	1.625	19.8104	381.247
7.47706e+07	1.63194	19.895	381.17
7.47712e+07	1.63889	19.9797	381.094
7.47718e+07	1.64583	20.0643	381.017
7.47724e+07	1.65278	20.149	380.94
7.4773e+07	1.65972	20.2337	380.864
7.47736e+07	1.66667	20.3183	380.787
7.47742e+07	1.67361	20.403	380.71
7.47748e+07	1.68056	20.4876	380.633
7.47754e+07	1.6875	20.5723	380.556
7.4776e+07	1.69444	20.657	380.479
7.47766e+07	1.70139	20.7416	380.402
7.47772e+07	1.70833	20.8263	380.324
7.47778e+07	1.71528	20.9109	380.247
7.47784e+07	1.72222	20.9956	380.17
7.4779e+07	1.72917	21.0803	380.093
7.47796e+07	1.73611	21.1649	380.015
7.47802e+07	1.74306	21.2496	379.938
7.47808e+07	1.75	21.3342	379.861
7.47814e+07	1.75694	21.4189	379.783
7.4782e+07	1.76389	21.5036	379.706
7.47826e+07	1.77083	21.5882	379.628
7.47832e+07	1.77778	21.6729	379.55
7.47838e+07	1.78472	21.7575	379.473
7.47844e+07	1.79167	21.8422	379.395
7.4785e+07	1.79861	21.9269	379.317
7.47856e+07	1.80556	22.0115	379.239
7.47862e+07	1.8125	22.0962	379.162
7.47868e+07	1.81944	22.1808	379.084
7.47874e+07	1.82639	22.2655	379.006
7.4788e+07	1.83333	22.3502	378.928
7.47886e+07	1.84028	22.4348	378.85
7.47892e+07	1.84722	22.5195	378.772
7.47898e+07	1.85417	22.6041	378.693
7.47904e+07	1.86111	22.6888	378.615
7.4791e+07	1.86806	22.7735	378.537
7.47916e+07	1.875	22.8581	378.459
7.47922e+07	1.88194	22.9428	378.38
7.47928e+07	1.88889	23.0274	378.302
7.47934e+07	1.89583	23.1121	378.223
7.4794e+07	1.90278	23.1967	378.145
7.47946e+07	1.90972	23.2814	378.066
7.47952e+07	1.91667	23.3661	377.988
7.47958e+07	1.92361	23.4507	377.909
7.47964e+07	1.93056	23.5354	377.83
7.4797e+07	1.9375	23.62	377.752
7.47976e+07	1.94444	23.7047	377.673
7.47982e+07	1.95139	23.7894	377.594
7.47988e+07	1.95833	23.874	377.515
7.47994e+07	1.96528	23.9587	377.436
7.48e+07	1.97222	24.0433	377.357
7.48006e+07	1.97917	24.128	377.278
7.48012e+07	1.98611	24.2127	377.199
7.48018e+07	1.99306	24.2973	377.12
7.48024e+07	2	24.382	377.041
7.4803e+07	2.00694	24.4666	376.961
7.48036e+07	2.01389	24.5513	376.882
7.48042e+07	2.02083	24.636	376.803
7.48048e+07	2.02778	24.7206	376.723
7.48054e+07	2.03472	24.8053	376.644
7.4806e+07	2.04167	24.8899	376.564
7.48066e+07	2.04861	24.9746	376.485
7.48072e+07	2.05556	25.0593	376.405
7.48078e+07	2.0625	25.1439	376.326
7.48084e+07	2.06944	25.2286	376.246
7.4809e+07	2.07639	25.3132	376.166
7.48096e+07	2.08333	25.3979	376.086
7.48102e+07	2.09028	25.4826	376.007
7.48108e+07	2.09722	25.5672	375.927
7.48114e+07	2.10417	25.6519	375.847
7.4812e+07	2.11111	25.7365	375.767
7.48126e+07	2.11806	25.8212	375.687
7.48132e+07	2.125	25.9059	375.607
7.48138e+07	2.13194	25.9905	375.526
7.48144e+07	2.13889	26.0752	375.446
7.4815e+07	2.14583	26.1598	375.366
7.48156e+07	2.15278	26.2445	375.286
7.48162e+07	2.15972	26.3292	375.205
7.48168e+07	2.16667	26.4138	375.125
7.48174e+07	2.17361	26.4985	375.044
7.4818e+07	2.18056	26.5831	374.964
7.48186e+07	2.1875	26.6678	374.883
7.48192e+07	2.19444	26.7525	374.803
7.48198e+07	2.20139	26.8371	374.722
7.48204e+07	2.20833	26.9218	374.641
7.4821e+07	2.21528	27.0064	374.56
7.48216e+07	2.22222	27.0911	374.48
7.48222e+07	2.22917	27.1758	374.399
7.48228e+07	2.23611	27.2604	374.318
7.48234e+07	2.24306	27.3451	374.237
7.4824e+07	2.25	27.4297	374.156
7.48246e+07	2.25694	27.5144	374.075
7.48252e+07	2.26389	27.5991	373.993
7.48258e+07	2.27083	27.6837	373.912
7.48264e+07	2.27778	27.7684	373.831
7.4827e+07	2.28472	27.853	373.75
7.48276e+07	2.29167	27.9377	373.668
7.48282e+07	2.29861	28.0224	373.587
7.48288e+07	2.30556	28.107	373.505
7.48294e+07	2.3125	28.1917	373.424
7.483e+07	2.31944	28.2763	373.342
7.48306e+07	2.32639	28.361	373.261
7.48312e+07	2.33333	28.4456	373.179
7.48318e+07	2.34028	28.5303	373.097
7.48324e+07	2.34722	28.615	373.015
7.4833e+07	2.35417	28.6996	372.933
7.48336e+07	2.36111	28.7843	372.852
7.48342e+07	2.36806	28.8689	372.77
7.48348e+07	2.375	28.9536	372.688
7.48354e+07	2.38194	29.0383	372.605
7.4836e+07	2.38889	29.1229	372.523
7.48366e+07	2.39583	29.2076	372.441
7.48372e+07	2.40278	29.2922	372.359
7.48378e+07	2.40972	29.3769	372.277
7.48384e+07	2.41667	29.4616	372.194
7.4839e+07	2.42361	29.5462	372.112
7.48396e+07	2.43056	29.6309	372.029
7.48402e+07	2.4375	29.7155	371.947
7.48408e+07	2.44444	29.8002	371.864
7.48414e+07	2.45139	29.8849	371.782
7.4842e+07	2.45833	29.9695	371.699
7.48426e+07	2.46528	30.0542	371.616
7.48432e+07	2.47222	30.1388	371.534
7.48438e+07	2.47917	30.2235	371.451
7.48444e+07	2.48611	30.3082	371.368
7.4845e+07	2.49306	30.3928	371.285
7.48456e+07	2.5	30.4775	371.202
7.48462e+07	2.50694	30.5621	371.119
7.48468e+07	2.51389	30.6468	371.036
7.48474e+07	2.52083	30.7315	370.952
7.4848e+07	2.52778	30.8161	370.869
7.48486e+07	2.53472	30.9008	370.786
7.48492e+07	2.54167	30.9854	370.703
7.48498e+07	2.54861	31.0701	370.619
7.48504e+07	2.55556	31.1548	370.536
7.4851e+07	2.5625	31.2394	370.452
7.48516e+07	2.56944	31.3241	370.369
7.48522e+07	2.57639	31.4087	370.285
7.48528e+07	2.58333	31.4934	370.201
7.48534e+07	2.59028	31.5781	370.118
7.4854e+07	2.59722	31.6627	370.034
7.48546e+07	2.60417	31.7474	369.95
7.48552e+07	2.61111	31.832	369.866
7.48558e+07	2.61806	31.9167	369.782
7.48564e+07	2.625	32.0014	369.698
7.4857e+07	2.63194	32.086	369.614
7.48576e+07	2.63889	32.1707	369.53
7.48582e+07	2.64583	32.2553	369.445
7.48588e+07	2.65278	32.34	369.361
7.48594e+07	2.65972	32.4247	369.277
7.486e+07	2.66667	32.5093	369.192
7.48606e+07	2.67361	32.594	369.108
7.48612e+07	2.68056	32.6786	369.024
7.48618e+07	2.6875	32.7633	368.939
7.48624e+07	2.69444	32.848	368.854
7.4863e+07	2.70139	32.9326	368.77
7.48636e+07	2.70833	33.0173	368.685
7.48642e+07	2.71528	33.1019	368.6
7.48648e+07	2.72222	33.1866	368.515
7.48654e+07	2.72917	33.2712	368.43
7.4866e+07	2.73611	33.3559	368.345
7.48666e+07	2.74306	33.4406	368.26
7.48672e+07	2.75	33.5252	368.175
7.48678e+07	2.75694	33.6099	368.09
7.48684e+07	2.76389	33.6945	368.005
7.4869e+07	2.77083	33.7792	367.92
7.48696e+07	2.77778	33.8639	367.834
7.48702e+07	2.78472	33.9485	367.749
7.48708e+07	2.79167	34.0332	367.664
7.48714e+07	2.79861	34.1178	367.578
7.4872e+07	2.80556	34.2025	367.493
7.48726e+07	2.8125	34.2872	367.407
7.48732e+07	2.81944	34.3718	367.321
7.48738e+07	2.82639	34.4565	367.235
7.48744e+07	2.83333	34.5411	367.15
7.4875e+07	2.84028	34.6258	367.064
7.48756e+07	2.84722	34.7105	366.978
7.48762e+07	2.85417	34.7951	366.892
7.48768e+07	2.86111	34.8798	366.806
7.48774e+07	2.86806	34.9644	366.72
7.4878e+07	2.875	35.0491	366.634
7.48786e+07	2.88194	35.1338	366.547
7.48792e+07	2.88889	35.2184	366.461
7.48798e+07	2.89583	35.3031	366.375
7.48804e+07	2.90278	35.3877	366.288
7.4881e+07	2.90972	35.4724	366.202
7.48816e+07	2.91667	35.5571	366.115
7.48822e+07	2.92361	35.6417	366.029
7.48828e+07	2.93056	35.7264	365.942
7.48834e+07	2.9375	35.811	365.855
7.4884e+07	2.94444	35.8957	365.769
7.48846e+07	2.95139	35.9804	365.682
7.48852e+07	2.95833	36.065	365.587
7.48858e+07	2.96528	36.1497	365.473
7.48864e+07	2.97222	36.2343	365.349
7.4887e+07	2.97917	36.319	365.218
7.48876e+07	2.98611	36.4037	365.084
7.48882e+07	2.99306	36.4883	364.948
7.48888e+07	3	36.573	364.812
7.48894e+07	3.00694	36.6576	364.674
7.489e+07	3.01389	36.7423	364.536
7.48906e+07	3.02083	36.827	364.398
7.48912e+07	3.02778	36.9116	364.26
7.48918e+07	3.03472	36.9963	364.121
7.48924e+07	3.04167	37.0809	363.983
7.4893e+07	3.04861	37.1656	363.844
7.48936e+07	3.05556	37.2503	363.705
7.48942e+07	3.0625	37.3349	363.566
7.48948e+07	3.06944	37.4196	363.426
7.48954e+07	3.07639	37.5042	363.287
7.4896e+07	3.08333	37.5889	363.147
7.48966e+07	3.09028	37.6736	363.007
7.48972e+07	3.09722	37.7582	362.867
7.48978e+07	3.10417	37.8429	362.727
7.48984e+07	3.11111	37.9275	362.587
7.4899e+07	3.11806	38.0122	362.446
7.48996e+07	3.125	38.0969	362.306
7.49002e+07	3.13194	38.1815	362.165
7.49008e+07	3.13889	38.2662	362.024
7.49014e+07	3.14583	38.3508	361.883
7.4902e+07	3.15278	38.4355	361.741
7.49026e+07	3.15972	38.5201	361.6
7.49032e+07	3.16667	38.6048	361.458
7.49038e+07	3.17361	38.6895	361.316
7.49044e+07	3.18056	38.7741	361.174
7.4905e+07	3.1875	38.8588	361.032
7.49056e+07	3.19444	38.9434	360.89
7.49062e+07	3.20139	39.0281	360.748
7.49068e+07	3.20833	39.1128	360.605
7.49074e+07	3.21528	39.1974	360.462
7.4908e+07	3.22222	39.2821	360.319
7.49086e+07	3.22917	39.3667	360.176
7.49092e+07	3.23611	39.4514	360.033
7.49098e+07	3.24306	39.5361	359.889
7.49104e+07	3.25	39.6207	359.745
7.4911e+07	3.25694	39.7054	359.602
7.49116e+07	3.26389	39.79	359.458
7.49122e+07	3.27083	39.8747	359.313
7.49128e+07	3.27778	39.9594	359.169
7.49134e+07	3.28472	40.044	359.025
7.4914e+07	3.29167	40.1287	358.88
7.49146e+07	3.29861	40.2133	358.735
7.49152e+07	3.30556	40.298	358.59
7.49158e+07	3.3125	40.3827	358.445
7.49164e+07	3.31944	40.4673	358.299
7.4917e+07	3.32639	40.552	358.154
7.49176e+07	3.33333	40.6366	358.008
7.49182e+07	3.34028	40.7213	357.862
7.49188e+07	3.34722	40.806	357.716
7.49194e+07	3.35417	40.8906	357.57
7.492e+07	3.36111	40.9753	357.423
7.49206e+07	3.36806	41.0599	357.277
7.49212e+07	3.375	41.1446	357.13
7.49218e+07	3.38194	41.2293	356.983
7.49224e+07	3.38889	41.3139	356.836
7.4923e+07	3.39583	41.3986	356.688
7.49236e+07	3.40278	41.4832	356.541
7.49242e+07	3.40972	41.5679	356.393
7.49248e+07	3.41667	41.6526	356.245
7.49254e+07	3.42361	41.7372	356.097
7.4926e+07	3.43056	41.8219	355.949
7.49266e+07	3.4375	41.9065	355.8
7.49272e+07	3.44444	41.9912	355.651
7.49278e+07	3.45139	42.0759	355.503
7.49284e+07	3.45833	42.1605	355.354
7.4929e+07	3.46528	42.2452	355.204
7.49296e+07	3.47222	42.3298	355.055
7.49302e+07	3.47917	42.4145	354.905
7.49308e+07	3.48611	42.4992	354.756
7.49314e+07	3.49306	42.5838	354.606
7.4932e+07	3.5	42.6685	354.456
7.49326e+07	3.50694	42.7531	354.305
7.49332e+07	3.51389	42.8378	354.155
7.49338e+07	3.52083	42.9225	354.004
7.49344e+07	3.52778	43.0071	353.853
7.4935e+07	3.53472	43.0918	353.702
7.49356e+07	3.54167	43.1764	353.551
7.49362e+07	3.54861	43.2611	353.399
7.49368e+07	3.55556	43.3458	353.247
7.49374e+07	3.5625	43.4304	353.096
7.4938e+07	3.56944	43.5151	352.943
7.49386e+07	3.57639	43.5997	352.791
7.49392e+07	3.58333	43.6844	352.639
7.49398e+07	3.59028	43.769	352.486
7.49404e+07	3.59722	43.8537	352.333
7.4941e+07	3.60417	43.9384	352.18
7.49416e+07	3.61111	44.023	352.027
7.49422e+07	3.61806	44.1077	351.873
7.49428e+07	3.625	44.1923	351.72
7.49434e+07	3.63194	44.277	351.566
7.4944e+07	3.63889	44.3617	351.412
7.49446e+07	3.64583	44.4463	351.258
7.49452e+07	3.65278	44.531	351.103
7.49458e+07	3.65972	44.6156	350.948
7.49464e+07	3.66667	44.7003	350.794
7.4947e+07	3.67361	44.785	350.638
7.49476e+07	3.68056	44.8696	350.483
7.49482e+07	3.6875	44.9543	350.328
7.49488e+07	3.69444	45.0389	350.172
7.49494e+07	3.70139	45.1236	350.016
7.495e+07	3.70833	45.2083	349.86
7.49506e+07	3.71528	45.2929	349.704
7.49512e+07	3.72222	45.3776	349.547
7.49518e+07	3.72917	45.4622	349.39
7.49524e+07	3.73611	45.5469	349.233
7.4953e+07	3.74306	45.6316	349.076
7.49536e+07	3.75	45.7162	348.919
7.49542e+07	3.75694	45.8009	348.761
7.49548e+07	3.76389	45.8855	348.603
7.49554e+07	3.77083	45.9702	348.445
7.4956e+07	3.77778	46.0549	348.287
7.49566e+07	3.78472	46.1395	348.129
7.49572e+07	3.79167	46.2242	347.97
7.49578e+07	3.79861	46.3088	347.811
7.49584e+07	3.80556	46.3935	347.652
7.4959e+07	3.8125	46.4782	347.493
7.49596e+07	3.81944	46.5628	347.333
7.49602e+07	3.82639	46.6475	347.174
7.49608e+07	3.83333	46.7321	347.014
7.49614e+07	3.84028	46.8168	346.853
7.4962e+07	3.84722	46.9015	346.693
7.49626e+07	3.85417	46.9861	346.532
7.49632e+07	3.86111	47.0708	346.372
7.49638e+07	3.86806	47.1554	346.21
7.49644e+07	3.875	47.2401	346.049
7.4965e+07	3.88194	47.3248	345.888
7.49656e+07	3.88889	47.4094	345.726
7.49662e+07	3.89583	47.4941	345.564
7.49668e+07	3.90278	47.5787	345.402
7.49674e+07	3.90972	47.6634	345.239
7.4968e+07	3.91667	47.7481	345.077
7.49686e+07	3.92361	47.8327	344.914
7.49692e+07	3.93056	47.9174	344.751
7.49698e+07	3.9375	48.002	344.587
7.49704e+07	3.94444	48.0867	344.424
7.4971e+07	3.95139	48.1714	344.26
7.49716e+07	3.95833	48.256	344.096
7.49722e+07	3.96528	48.3407	343.932
7.49728e+07	3.97222	48.4253	343.767
7.49734e+07	3.97917	48.51	343.603
7.4974e+07	3.98611	48.5946	343.438
7.49746e+07	3.99306	48.6793	343.272
7.49752e+07	4	48.764	343.107
7.49758e+07	4.00694	48.8486	342.941
7.49764e+07	4.01389	48.9333	342.775
7.4977e+07	4.02083	49.0179	342.609
7.49776e+07	4.02778	49.1026	342.443
7.49782e+07	4.03472	49.1873	342.276
7.49788e+07	4.04167	49.2719	342.109
7.49794e+07	4.04861	49.3566	341.942
7.498e+07	4.05556	49.4412	341.775
7.49806e+07	4.0625	49.5259	341.607
7.49812e+07	4.06944	49.6106	341.439
7.49818e+07	4.07639	49.6952	341.271
7.49824e+07	4.08333	49.7799	341.103
7.4983e+07	4.09028	49.8645	340.934
7.49836e+07	4.09722	49.9492	340.765
7.49842e+07	4.10417	50.0339	340.596
7.49848e+07	4.11111	50.1185	340.427
7.49854e+07	4.11806	50.2032	340.257
7.4986e+07	4.125	50.2878	340.088
7.49866e+07	4.13194	50.3725	339.918
7.49872e+07	4.13889	50.4572	339.747
7.49878e+07	4.14583	50.5418	339.577
7.49884e+07	4.15278	50.6265	339.406
7.4989e+07	4.15972	50.7111	339.235
7.49896e+07	4.16667	50.7958	339.063
7.49902e+07	4.17361	50.8805	338.892
7.49908e+07	4.18056	50.9651	338.72
7.49914e+07	4.1875	51.0498	338.548
7.4992e+07	4.19444	51.1344	338.375
7.49926e+07	4.20139	51.2191	338.203
7.49932e+07	4.20833	51.3038	338.03
7.49938e+07	4.21528	51.3884	337.856
7.49944e+07	4.22222	51.4731	337.683
7.4995e+07	4.22917	51.5577	337.509
7.49956e+07	4.23611	51.6424	337.335
7.49962e+07	4.24306	51.7271	337.161
7.49968e+07	4.25	51.8117	336.986
7.49974e+07	4.25694	51.8964	336.812
7.4998e+07	4.26389	51.981	336.637
7.49986e+07	4.27083	52.0657	336.461
7.49992e+07	4.27778	52.1504	336.286
7.49998e+07	4.28472	52.235	336.11
7.50004e+07	4.29167	52.3197	335.934
7.5001e+07	4.29861	52.4043	335.757
7.50016e+07	4.30556	52.489	335.581
7.50022e+07	4.3125	52.5737	335.404
7.50028e+07	4.31944	52.6583	335.226
7.50034e+07	4.32639	52.743	335.049
7.5004e+07	4.33333	52.8276	334.871
7.50046e+07	4.34028	52.9123	334.693
7.50052e+07	4.34722	52.997	334.515
7.50058e+07	4.35417	53.0816	334.336
7.50064e+07	4.36111	53.1663	334.157
7.5007e+07	4.36806	53.2509	333.978
7.50076e+07	4.375	53.3356	333.798
7.50082e+07	4.38194	53.4203	333.618
7.50088e+07	4.38889	53.5049	333.438
7.50094e+07	4.39583	53.5896	333.258
7.501e+07	4.40278	53.6742	333.077
7.50106e+07	4.40972	53.7589	332.896
7.50112e+07	4.41667	53.8435	332.715
7.50118e+07	4.42361	53.9282	332.533
7.50124e+07	4.43056	54.0129	332.352
7.5013e+07	4.4375	54.0975	332.161
7.50136e+07	4.44444	54.1822	331.962
7.50142e+07	4.45139	54.2668	331.756
7.50148e+07	4.45833	54.3515	331.547
7.50154e+07	4.46528	54.4362	331.335
7.5016e+07	4.47222	54.5208	331.121
7.50166e+07	4.47917	54.6055	330.906
7.50172e+07	4.48611	54.6901	330.69
7.50178e+07	4.49306	54.7748	330.473
7.50184e+07	4.5	54.8595	330.255
7.5019e+07	4.50694	54.9441	330.037
7.50196e+07	4.51389	55.0288	329.819
7.50202e+07	4.52083	55.1134	329.6
7.50208e+07	4.52778	55.1981	329.38
7.50214e+07	4.53472	55.2828	329.16
7.5022e+07	4.54167	55.3674	328.94
7.50226e+07	4.54861	55.4521	328.719
7.50232e+07	4.55556	55.5367	328.498
7.50238e+07	4.5625	55.6214	328.276
7.50244e+07	4.56944	55.7061	328.054
7.5025e+07	4.57639	55.7907	327.831
7.50256e+07	4.58333	55.8754	327.608
7.50262e+07	4.59028	55.96	327.385
7.50268e+07	4.59722	56.0447	327.161
7.50274e+07	4.60417	56.1294	326.936
7.5028e+07	4.61111	56.214	326.711
7.50286e+07	4.61806	56.2987	326.486
7.50292e+07	4.625	56.3833	326.26
7.50298e+07	4.63194	56.468	326.034
7.50304e+07	4.63889	56.5527	325.807
7.5031e+07	4.64583	56.6373	325.58
7.50316e+07	4.65278	56.722	325.352
7.50322e+07	4.65972	56.8066	325.124
7.50328e+07	4.66667	56.8913	324.896
7.50334e+07	4.67361	56.976	324.667
7.5034e+07	4.68056	57.0606	324.437
7.50346e+07	4.6875	57.1453	324.207
7.50352e+07	4.69444	57.2299	323.976
7.50358e+07	4.70139	57.3146	323.745
7.50364e+07	4.70833	57.3993	323.514
7.5037e+07	4.71528	57.4839	323.282
7.50376e+07	4.72222	57.5686	323.049
7.50382e+07	4.72917	57.6532	322.816
7.50388e+07	4.73611	57.7379	322.583
7.50394e+07	4.74306	57.8226	322.349
7.504e+07	4.75	57.9072	322.115
7.50406e+07	4.75694	57.9919	321.88
7.50412e+07	4.76389	58.0765	321.644
7.50418e+07	4.77083	58.1612	321.408
7.50424e+07	4.77778	58.2459	321.172
7.5043e+07	4.78472	58.3305	320.934
7.50436e+07	4.79167	58.4152	320.697
7.50442e+07	4.79861	58.4998	320.459
7.50448e+07	4.80556	58.5845	320.22
7.50454e+07	4.8125	58.6692	319.981
7.5046e+07	4.81944	58.7538	319.741
7.50466e+07	4.82639	58.8385	319.501
7.50472e+07	4.83333	58.9231	319.261
7.50478e+07	4.84028	59.0078	319.019
7.50484e+07	4.84722	59.0924	318.777
7.5049e+07	4.85417	59.1771	318.535
7.50496e+07	4.86111	59.2618	318.292
7.50502e+07	4.86806	59.3464	318.049
7.50508e+07	4.875	59.4311	317.805
7.50514e+07	4.88194	59.5157	317.56
7.5052e+07	4.88889	59.6004	317.315
7.50526e+07	4.89583	59.6851	317.07
7.50532e+07	4.90278	59.7697	316.823
7.50538e+07	4.90972	59.8544	316.577
7.50544e+07	4.91667	59.939	316.329
7.5055e+07	4.92361	60.0237	316.081
7.50556e+07	4.93056	60.1084	315.833
7.50562e+07	4.9375	60.193	315.584
7.50568e+07	4.94444	60.2777	315.334
7.50574e+07	4.95139	60.3623	315.084
7.5058e+07	4.95833	60.447	314.833
7.50586e+07	4.96528	60.5317	314.582
7.50592e+07	4.97222	60.6163	314.33
7.50598e+07	4.97917	60.701	314.077
7.50604e+07	4.98611	60.7856	313.824
7.5061e+07	4.99306	60.8703	313.57
7.50616e+07	5	60.955	313.316
7.50622e+07	5.00694	61.0396	313.061
7.50628e+07	5.01389	61.1243	312.805
7.50634e+07	5.02083	61.2089	312.549
7.5064e+07	5.02778	61.2936	312.292
7.50646e+07	5.03472	61.3783	312.034
7.50652e+07	5.04167	61.4629	311.776
7.50658e+07	5.04861	61.5476	311.517
7.50664e+07	5.05556	61.6322	311.258
7.5067e+07	5.0625	61.7169	310.998
7.50676e+07	5.06944	61.8016	310.737
7.50682e+07	5.07639	61.8862	310.476
7.50688e+07	5.08333	61.9709	310.214
7.50694e+07	5.09028	62.0555	309.951
7.507e+07	5.09722	62.1402	309.688
7.50706e+07	5.10417	62.2249	309.424
7.50712e+07	5.11111	62.3095	309.159
7.50718e+07	5.11806	62.3942	308.894
7.50724e+07	5.125	62.4788	308.628
7.5073e+07	5.13194	62.5635	308.362
7.50736e+07	5.13889	62.6482	308.094
7.50742e+07	5.14583	62.7328	307.826
7.50748e+07	5.15278	62.8175	307.558
7.50754e+07	5.15972	62.9021	307.288
7.5076e+07	5.16667	62.9868	307.018
7.50766e+07	5.17361	63.0715	306.748
7.50772e+07	5.18056	63.1561	306.476
7.50778e+07	5.1875	63.2408	306.204
7.50784e+07	5.19444	63.3254	305.931
7.5079e+07	5.20139	63.4101	305.657
7.50796e+07	5.20833	63.4948	305.383
7.50802e+07	5.21528	63.5794	305.108
7.50808e+07	5.22222	63.6641	304.832
7.50814e+07	5.22917	63.7487	304.556
7.5082e+07	5.23611	63.8334	304.279
7.50826e+07	5.24306	63.918	304.001
7.50832e+07	5.25	64.0027	303.722
7.50838e+07	5.25694	64.0874	303.442
7.50844e+07	5.26389	64.172	303.162
7.5085e+07	5.27083	64.2567	302.881
7.50856e+07	5.27778	64.3413	302.599
7.50862e+07	5.28472	64.426	302.317
7.50868e+07	5.29167	64.5107	302.034
7.50874e+07	5.29861	64.5953	301.749
7.5088e+07	5.30556	64.68	301.465
7.50886e+07	5.3125	64.7646	301.179
7.50892e+07	5.31944	64.8493	300.892
7.50898e+07	5.32639	64.934	300.605
7.50904e+07	5.33333	65.0186	300.317
7.5091e+07	5.34028	65.1033	300.028
7.50916e+07	5.34722	65.1879	299.739
7.50922e+07	5.35417	65.2726	299.448
7.50928e+07	5.36111	65.3573	299.157
7.50934e+07	5.36806	65.4419	298.864
7.5094e+07	5.375	65.5266	298.571
7.50946e+07	5.38194	65.6112	298.278
7.50952e+07	5.38889	65.6959	297.983
7.50958e+07	5.39583	65.7806	297.687
7.50964e+07	5.40278	65.8652	297.391
7.5097e+07	5.40972	65.9499	297.094
7.50976e+07	5.41667	66.0345	296.795
7.50982e+07	5.42361	66.1192	296.496
7.50988e+07	5.43056	66.2039	296.196
7.50994e+07	5.4375	66.2885	295.896
7.51e+07	5.44444	66.3732	295.594
7.51006e+07	5.45139	66.4578	295.291
7.51012e+07	5.45833	66.5425	294.988
7.51018e+07	5.46528	66.6272	294.683
7.51024e+07	5.47222	66.7118	294.378
7.5103e+07	5.47917	66.7965	294.072
7.51036e+07	5.48611	66.8811	293.764
7.51042e+07	5.49306	66.9658	293.456
7.51048e+07	5.5	67.0505	293.147
7.51054e+07	5.50694	67.1351	292.837
7.5106e+07	5.51389	67.2198	292.526
7.51066e+07	5.52083	67.3044	292.214
7.51072e+07	5.52778	67.3891	291.901
7.51078e+07	5.53472	67.4738	291.587
7.51084e+07	5.54167	67.5584	291.272
7.5109e+07	5.54861	67.6431	290.956
7.51096e+07	5.55556	67.7277	290.639
7.51102e+07	5.5625	67.8124	290.321
7.51108e+07	5.56944	67.8971	290.002
7.51114e+07	5.57639	67.9817	289.682
7.5112e+07	5.58333	68.0664	289.361
7.51126e+07	5.59028	68.151	289.039
7.51132e+07	5.59722	68.2357	288.716
7.51138e+07	5.60417	68.3204	288.392
7.51144e+07	5.61111	68.405	288.067
7.5115e+07	5.61806	68.4897	287.74
7.51156e+07	5.625	68.5743	287.413
7.51162e+07	5.63194	68.659	287.085
7.51168e+07	5.63889	68.7437	286.755
7.51174e+07	5.64583	68.8283	286.424
7.5118e+07	5.65278	68.913	286.093
7.51186e+07	5.65972	68.9976	285.76
7.51192e+07	5.66667	69.0823	285.426
7.51198e+07	5.67361	69.1669	285.091
7.51204e+07	5.68056	69.2516	284.754
7.5121e+07	5.6875	69.3363	284.417
7.51216e+07	5.69444	69.4209	284.078
7.51222e+07	5.70139	69.5056	283.738
7.51228e+07	5.70833	69.5902	283.397
7.51234e+07	5.71528	69.6749	283.055
7.5124e+07	5.72222	69.7596	282.712
7.51246e+07	5.72917	69.8442	282.367
7.51252e+07	5.73611	69.9289	282.021
7.51258e+07	5.74306	70.0135	281.674
7.51264e+07	5.75	70.0982	281.326
7.5127e+07	5.75694	70.1829	280.976
7.51276e+07	5.76389	70.2675	280.626
7.51282e+07	5.77083	70.3522	280.274
7.51288e+07	5.77778	70.4368	279.92
7.51294e+07	5.78472	70.5215	279.565
7.513e+07	5.79167	70.6062	279.21
7.51306e+07	5.79861	70.6908	278.852
7.51312e+07	5.80556	70.7755	278.494
7.51318e+07	5.8125	70.8601	278.134
7.51324e+07	5.81944	70.9448	277.772
7.5133e+07	5.82639	71.0295	277.41
7.51336e+07	5.83333	71.1141	277.046
7.51342e+07	5.84028	71.1988	276.68
7.51348e+07	5.84722	71.2834	276.313
7.51354e+07	5.85417	71.3681	275.945
7.5136e+07	5.86111	71.4528	275.575
7.51366e+07	5.86806	71.5374	275.204
7.51372e+07	5.875	71.6221	274.832
7.51378e+07	5.88194	71.7067	274.458
7.51384e+07	5.88889	71.7914	274.082
7.5139e+07	5.89583	71.8761	273.705
7.51396e+07	5.90278	71.9607	273.327
7.51402e+07	5.90972	72.0454	272.95
7.51408e+07	5.91667	72.13	272.586
7.51414e+07	5.92361	72.2147	272.234
7.5142e+07	5.93056	72.2994	271.892
7.51426e+07	5.9375	72.384	271.556
7.51432e+07	5.94444	72.4687	271.225
7.51438e+07	5.95139	72.5533	270.897
7.51444e+07	5.95833	72.638	270.572
7.5145e+07	5.96528	72.7227	270.249
7.51456e+07	5.97222	72.8073	269.926
7.51462e+07	5.97917	72.892	269.605
7.51468e+07	5.98611	72.9766	269.283
7.51474e+07	5.99306	73.0613	268.961
7.5148e+07	6	73.146	268.639
7.51486e+07	6.00694	73.2306	268.316
7.51492e+07	6.01389	73.3153	267.993
7.51498e+07	6.02083	73.3999	267.669
7.51504e+07	6.02778	73.4846	267.344
7.5151e+07	6.03472	73.5693	267.018
7.51516e+07	6.04167	73.6539	266.691
7.51522e+07	6.04861	73.7386	266.363
7.51528e+07	6.05556	73.8232	266.034
7.51534e+07	6.0625	73.9079	265.704
7.5154e+07	6.06944	73.9925	265.373
7.51546e+07	6.07639	74.0772	265.04
7.51552e+07	6.08333	74.1619	264.707
7.51558e+07	6.09028	74.2465	264.372
7.51564e+07	6.09722	74.3312	264.036
7.5157e+07	6.10417	74.4158	263.699
7.51576e+07	6.11111	74.5005	263.361
7.51582e+07	6.11806	74.5852	263.021
7.51588e+07	6.125	74.6698	262.68
7.51594e+07	6.13194	74.7545	262.338
7.516e+07	6.13889	74.8391	261.995
7.51606e+07	6.14583	74.9238	261.65
7.51612e+07	6.15278	75.0085	261.304
7.51618e+07	6.15972	75.0931	260.957
7.51624e+07	6.16667	75.1778	260.608
7.5163e+07	6.17361	75.2624	260.259
7.51636e+07	6.18056	75.3471	259.907
7.51642e+07	6.1875	75.4318	259.555
7.51648e+07	6.19444	75.5164	259.201
7.51654e+07	6.20139	75.6011	258.845
7.5166e+07	6.20833	75.6857	258.488
7.51666e+07	6.21528	75.7704	258.13
7.51672e+07	6.22222	75.8551	257.771
7.51678e+07	6.22917	75.9397	257.409
7.51684e+07	6.23611	76.0244	257.047
7.5169e+07	6.24306	76.109	256.683
7.51696e+07	6.25	76.1937	256.318
7.51702e+07	6.25694	76.2784	255.951
7.51708e+07	6.26389	76.363	255.582
7.51714e+07	6.27083	76.4477	255.212
7.5172e+07	6.27778	76.5323	254.841
7.51726e+07	6.28472	76.617	254.468
7.51732e+07	6.29167	76.7017	254.093
7.51738e+07	6.29861	76.7863	253.717
7.51744e+07	6.30556	76.871	253.339
7.5175e+07	6.3125	76.9556	252.96
7.51756e+07	6.31944	77.0403	252.579
7.51762e+07	6.32639	77.125	252.196
7.51768e+07	6.33333	77.2096	251.812
7.51774e+07	6.34028	77.2943	251.426
7.5178e+07	6.34722	77.3789	251.038
7.51786e+07	6.35417	77.4636	250.649
7.51792e+07	6.36111	77.5483	250.258
7.51798e+07	6.36806	77.6329	249.865
7.51804e+07	6.375	77.7176	249.471
7.5181e+07	6.38194	77.8022	249.074
7.51816e+07	6.38889	77.8869	248.676
7.51822e+07	6.39583	77.9716	248.276
7.51828e+07	6.40278	78.0562	247.875
7.51834e+07	6.40972	78.1409	247.471
7.5184e+07	6.41667	78.2255	247.066
7.51846e+07	6.42361	78.3102	246.658
7.51852e+07	6.43056	78.3949	246.249
7.51858e+07	6.4375	78.4795	245.838
7.51864e+07	6.44444	78.5642	245.425
7.5187e+07	6.45139	78.6488	245.01
7.51876e+07	6.45833	78.7335	244.593
7.51882e+07	6.46528	78.8182	244.174
7.51888e+07	6.47222	78.9028	243.753
7.51894e+07	6.47917	78.9875	243.33
7.519e+07	6.48611	79.0721	242.905
7.51906e+07	6.49306	79.1568	242.477
7.51912e+07	6.5	79.2414	242.048
7.51918e+07	6.50694	79.3261	241.616
7.51924e+07	6.51389	79.4108	241.183
7.5193e+07	6.52083	79.4954	240.747
7.51936e+07	6.52778	79.5801	240.309
7.51942e+07	6.53472	79.6647	239.869
7.51948e+07	6.54167	79.7494	239.426
7.51954e+07	6.54861	79.8341	238.981
7.5196e+07	6.55556	79.9187	238.534
7.51966e+07	6.5625	80.0034	238.085
7.51972e+07	6.56944	80.088	237.633
7.51978e+07	6.57639	80.1727	237.179
7.51984e+07	6.58333	80.2574	236.722
7.5199e+07	6.59028	80.342	236.263
7.51996e+07	6.59722	80.4267	235.801
7.52002e+07	6.60417	80.5113	235.337
7.52008e+07	6.61111	80.596	234.87
7.52014e+07	6.61806	80.6807	234.401
7.5202e+07	6.625	80.7653	233.929
7.52026e+07	6.63194	80.85	233.455
7.52032e+07	6.63889	80.9346	232.978
7.52038e+07	6.64583	81.0193	232.498
7.52044e+07	6.65278	81.104	232.016
7.5205e+07	6.65972	81.1886	231.53
7.52056e+07	6.66667	81.2733	231.042
7.52062e+07	6.67361	81.3579	230.551
7.52068e+07	6.68056	81.4426	230.057
7.52074e+07	6.6875	81.5273	229.56
7.5208e+07	6.69444	81.6119	229.061
7.52086e+07	6.70139	81.6966	228.558
7.52092e+07	6.70833	81.7812	228.052
7.52098e+07	6.71528	81.8659	227.543
7.52104e+07	6.72222	81.9506	227.032
7.5211e+07	6.72917	82.0352	226.516
7.52116e+07	6.73611	82.1199	225.998
7.52122e+07	6.74306	82.2045	225.477
7.52128e+07	6.75	82.2892	224.952
7.52134e+07	6.75694	82.3739	224.424
7.5214e+07	6.76389	82.4585	223.892
7.52146e+07	6.77083	82.5432	223.357
7.52152e+07	6.77778	82.6278	222.819
7.52158e+07	6.78472	82.7125	222.277
7.52164e+07	6.79167	82.7972	221.732
7.5217e+07	6.79861	82.8818	221.183
7.52176e+07	6.80556	82.9665	220.63
7.52182e+07	6.8125	83.0511	220.074
7.52188e+07	6.81944	83.1358	219.513
7.52194e+07	6.82639	83.2205	218.949
7.522e+07	6.83333	83.3051	218.381
7.52206e+07	6.84028	83.3898	217.81
7.52212e+07	6.84722	83.4744	217.234
7.52218e+07	6.85417	83.5591	216.654
7.52224e+07	6.86111	83.6438	216.07
7.5223e+07	6.86806	83.7284	215.481
7.52236e+07	6.875	83.8131	214.889
7.52242e+07	6.88194	83.8977	214.292
7.52248e+07	6.88889	83.9824	213.691
7.52254e+07	6.89583	84.0671	213.085
7.5226e+07	6.90278	84.1517	212.475
7.52266e+07	6.90972	84.2364	211.86
7.52272e+07	6.91667	84.321	211.24
7.52278e+07	6.92361	84.4057	210.616
7.52284e+07	6.93056	84.4903	209.987
7.5229e+07	6.9375	84.575	209.353
7.52296e+07	6.94444	84.6597	208.714
7.52302e+07	6.95139	84.7443	208.07
7.52308e+07	6.95833	84.829	207.42
7.52314e+07	6.96528	84.9136	206.766
7.5232e+07	6.97222	84.9983	206.106
7.52326e+07	6.97917	85.083	205.44
7.52332e+07	6.98611	85.1676	204.77
7.52338e+07	6.99306	85.2523	204.093
7.52344e+07	7	85.3369	203.411
7.5235e+07	7.00694	85.4216	202.723
7.52356e+07	7.01389	85.5063	202.029
7.52362e+07	7.02083	85.5909	201.329
7.52368e+07	7.02778	85.6756	200.623
7.52374e+07	7.03472	85.7602	199.91
7.5238e+07	7.04167	85.8449	199.191
7.52386e+07	7.04861	85.9296	198.466
7.52392e+07	7.05556	86.0142	197.734
7.52398e+07	7.0625	86.0989	196.996
7.52404e+07	7.06944	86.1835	196.25
7.5241e+07	7.07639	86.2682	195.498
7.52416e+07	7.08333	86.3529	194.738
7.52422e+07	7.09028	86.4375	193.971
7.52428e+07	7.09722	86.5222	193.196
7.52434e+07	7.10417	86.6068	192.414
7.5244e+07	7.11111	86.6915	191.625
7.52446e+07	7.11806	86.7762	190.827
7.52452e+07	7.125	86.8608	190.021
7.52458e+07	7.13194	86.9455	189.207
7.52464e+07	7.13889	87.0301	188.385
7.5247e+07	7.14583	87.1148	187.554
7.52476e+07	7.15278	87.1995	186.715
7.52482e+07	7.15972	87.2841	185.866
7.52488e+07	7.16667	87.3688	185.008
7.52494e+07	7.17361	87.4534	184.142
7.525e+07	7.18056	87.5381	183.265
7.52506e+07	7.1875	87.6228	182.379
7.52512e+07	7.19444	87.7074	181.483
7.52518e+07	7.20139	87.7921	180.577
7.52524e+07	7.20833	87.8767	179.661
7.5253e+07	7.21528	87.9614	178.734
7.52536e+07	7.22222	88.0461	177.796
7.52542e+07	7.22917	88.1307	176.847
7.52548e+07	7.23611	88.2154	175.886
7.52554e+07	7.24306	88.3	174.914
7.5256e+07	7.25	88.3847	173.93
7.52566e+07	7.25694	88.4694	172.934
7.52572e+07	7.26389	88.554	171.925
7.52578e+07	7.27083	88.6387	170.904
7.52584e+07	7.27778	88.7233	169.869
7.5259e+07	7.28472	88.808	168.821
7.52596e+07	7.29167	88.8927	167.759
7.52602e+07	7.29861	88.9773	166.683
7.52608e+07	7.30556	89.062	165.593
7.52614e+07	7.3125	89.1466	164.488
7.5262e+07	7.31944	89.2313	163.368
7.52626e+07	7.32639	89.3159	162.232
7.52632e+07	7.33333	89.4006	161.081
7.52638e+07	7.34028	89.4853	159.913
7.52644e+07	7.34722	89.5699	158.728
7.5265e+07	7.35417	89.6546	157.526
7.52656e+07	7.36111	89.7392	156.306
7.52662e+07	7.36806	89.8239	155.068
7.52668e+07	7.375	89.9086	153.811
7.52674e+07	7.38194	89.9932	152.535
7.5268e+07	7.38889	90.0779	151.271
7.52686e+07	7.39583	90.1625	150.064
7.52692e+07	7.40278	90.2472	148.909
7.52698e+07	7.40972	90.3319	147.805
7.52704e+07	7.41667	90.4165	146.747
7.5271e+07	7.42361	90.5012	145.733
7.52716e+07	7.43056	90.5858	144.759
7.52722e+07	7.4375	90.6705	143.825
7.52728e+07	7.44444	90.7552	142.927
7.52734e+07	7.45139	90.8398	142.063
7.5274e+07	7.45833	90.9245	141.231
7.52746e+07	7.46528	91.0091	140.431
7.52752e+07	7.47222	91.0938	139.659
7.52758e+07	7.47917	91.1785	138.915
7.52764e+07	7.48611	91.2631	138.198
7.5277e+07	7.49306	91.3478	137.505
7.52776e+07	7.5	91.4324	136.836
7.52782e+07	7.50694	91.5171	136.19
7.52788e+07	7.51389	91.6018	135.565
7.52794e+07	7.52083	91.6864	134.96
7.528e+07	7.52778	91.7711	134.375
7.52806e+07	7.53472	91.8557	133.809
7.52812e+07	7.54167	91.9404	133.261
7.52818e+07	7.54861	92.0251	132.73
7.52824e+07	7.55556	92.1097	132.215
7.5283e+07	7.5625	92.1944	131.716
7.52836e+07	7.56944	92.279	131.232
7.52842e+07	7.57639	92.3637	130.762
7.52848e+07	7.58333	92.4484	130.306
7.52854e+07	7.59028	92.533	129.864
7.5286e+07	7.59722	92.6177	129.435
7.52866e+07	7.60417	92.7023	129.017
7.52872e+07	7.61111	92.787	128.612
7.52878e+07	7.61806	92.8717	128.218
7.52884e+07	7.625	92.9563	127.835
7.5289e+07	7.63194	93.041	127.462
7.52896e+07	7.63889	93.1256	127.1
7.52902e+07	7.64583	93.2103	126.747
7.52908e+07	7.65278	93.295	126.404
7.52914e+07	7.65972	93.3796	126.07
7.5292e+07	7.66667	93.4643	125.745
7.52926e+07	7.67361	93.5489	125.428
7.52932e+07	7.68056	93.6336	125.12
7.52938e+07	7.6875	93.7183	124.82
7.52944e+07	7.69444	93.8029	124.527
7.5295e+07	7.70139	93.8876	124.241
7.52956e+07	7.70833	93.9722	123.963
7.52962e+07	7.71528	94.0569	123.692
7.52968e+07	7.72222	94.1416	123.427
7.52974e+07	7.72917	94.2262	123.169
7.5298e+07	7.73611	94.3109	122.918
7.52986e+07	7.74306	94.3955	122.672
7.52992e+07	7.75	94.4802	122.432
7.52998e+07	7.75694	94.5648	122.198
7.53004e+07	7.76389	94.6495	121.97
7.5301e+07	7.77083	94.7342	121.747
7.53016e+07	7.77778	94.8188	121.529
7.53022e+07	7.78472	94.9035	121.316
7.53028e+07	7.79167	94.9881	121.108
7.53034e+07	7.79861	95.0728	120.905
7.5304e+07	7.80556	95.1575	120.707
7.53046e+07	7.8125	95.2421	120.513
7.53052e+07	7.81944	95.3268	120.323
7.53058e+07	7.82639	95.4114	120.138
7.53064e+07	7.83333	95.4961	119.957
7.5307e+07	7.84028	95.5808	119.78
7.53076e+07	7.84722	95.6654	119.607
7.53082e+07	7.85417	95.7501	119.437
7.53088e+07	7.86111	95.8347	119.272
7.53094e+07	7.86806	95.9194	119.109
7.531e+07	7.875	96.0041	118.951
7.53106e+07	7.88194	96.0887	118.795
7.53112e+07	7.88889	96.1734	118.644
7.53118e+07	7.89583	96.258	118.495
7.53124e+07	7.90278	96.3427	118.349
7.5313e+07	7.90972	96.4274	118.207
7.53136e+07	7.91667	96.512	118.067
7.53142e+07	7.92361	96.5967	117.93
7.53148e+07	7.93056	96.6813	117.796
7.53154e+07	7.9375	96.766	117.665
7.5316e+07	7.94444	96.8507	117.537
7.53166e+07	7.95139	96.9353	117.411
7.53172e+07	7.95833	97.02	117.288
7.53178e+07	7.96528	97.1046	117.167
7.53184e+07	7.97222	97.1893	117.048
7.5319e+07	7.97917	97.274	116.932
7.53196e+07	7.98611	97.3586	116.819
7.53202e+07	7.99306	97.4433	116.707
7.53208e+07	8	97.5279	116.598
7.53214e+07	8.00694	97.6126	116.491
7.5322e+07	8.01389	97.6973	116.386
7.53226e+07	8.02083	97.7819	116.283
7.53232e+07	8.02778	97.8666	116.182
7.53238e+07	8.03472	97.9512	116.082
7.53244e+07	8.04167	98.0359	115.985
7.5325e+07	8.04861	98.1206	115.89
7.53256e+07	8.05556	98.2052	115.796
7.53262e+07	8.0625	98.2899	115.705
7.53268e+07	8.06944	98.3745	115.614
7.53274e+07	8.07639	98.4592	115.526
7.5328e+07	8.08333	98.5439	115.439
7.53286e+07	8.09028	98.6285	115.354
7.53292e+07	8.09722	98.7132	115.271
7.53298e+07	8.10417	98.7978	115.188
7.53304e+07	8.11111	98.8825	115.108
7.5331e+07	8.11806	98.9672	115.029
7.53316e+07	8.125	99.0518	114.951
7.53322e+07	8.13194	99.1365	114.875
7.53328e+07	8.13889	99.2211	114.8
7.53334e+07	8.14583	99.3058	114.726
7.5334e+07	8.15278	99.3905	114.654
7.53346e+07	8.15972	99.4751	114.583
7.53352e+07	8.16667	99.5598	114.513
7.53358e+07	8.17361	99.6444	114.444
7.53364e+07	8.18056	99.7291	114.377
7.5337e+07	8.1875	99.8137	114.31
7.53376e+07	8.19444	99.8984	114.245
7.53382e+07	8.20139	99.9831	114.181
7.53388e+07	8.20833	100.068	114.118
7.53394e+07	8.21528	100.152	114.056
7.534e+07	8.22222	100.237	113.995
7.53406e+07	8.22917	100.322	113.935
7.53412e+07	8.23611	100.406	113.877
7.53418e+07	8.24306	100.491	113.819
7.53424e+07	8.25	100.576	113.762
7.5343e+07	8.25694	100.66	113.706
7.53436e+07	8.26389	100.745	113.65
7.53442e+07	8.27083	100.83	113.596
7.53448e+07	8.27778	100.914	113.543
7.53454e+07	8.28472	100.999	113.49
7.5346e+07	8.29167	101.084	113.438
7.53466e+07	8.29861	101.168	113.387
7.53472e+07	8.30556	101.253	113.337
7.53478e+07	8.3125	101.338	113.288
7.53484e+07	8.31944	101.422	113.239
7.5349e+07	8.32639	101.507	113.191
7.53496e+07	8.33333	101.592	113.144
7.53502e+07	8.34028	101.676	113.098
7.53508e+07	8.34722	101.761	113.052
7.53514e+07	8.35417	101.846	113.007
7.5352e+07	8.36111	101.93	112.963
7.53526e+07	8.36806	102.015	112.919
7.53532e+07	8.375	102.1	112.876
7.53538e+07	8.38194	102.184	112.834
7.53544e+07	8.38889	102.269	112.792
7.5355e+07	8.39583	102.354	112.751
7.53556e+07	8.40278	102.438	112.71
7.53562e+07	8.40972	102.523	112.67
7.53568e+07	8.41667	102.608	112.63
7.53574e+07	8.42361	102.692	112.591
7.5358e+07	8.43056	102.777	112.553
7.53586e+07	8.4375	102.861	112.515
7.53592e+07	8.44444	102.946	112.478
7.53598e+07	8.45139	103.031	112.441
7.53604e+07	8.45833	103.115	112.405
7.5361e+07	8.46528	103.2	112.369
7.53616e+07	8.47222	103.285	112.333
7.53622e+07	8.47917	103.369	112.299
7.53628e+07	8.48611	103.454	112.264
7.53634e+07	8.49306	103.539	112.23
7.5364e+07	8.5	103.623	112.197
7.53646e+07	8.50694	103.708	112.164
7.53652e+07	8.51389	103.793	112.131
7.53658e+07	8.52083	103.877	112.099
7.53664e+07	8.52778	103.962	112.067
7.5367e+07	8.53472	104.047	112.035
7.53676e+07	8.54167	104.131	112.004
7.53682e+07	8.54861	104.216	111.974
7.53688e+07	8.55556	104.301	111.943
7.53694e+07	8.5625	104.385	111.913
7.537e+07	8.56944	104.47	111.884
7.53706e+07	8.57639	104.555	111.855
7.53712e+07	8.58333	104.639	111.826
7.53718e+07	8.59028	104.724	111.797
7.53724e+07	8.59722	104.809	111.769
7.5373e+07	8.60417	104.893	111.741
7.53736e+07	8.61111	104.978	111.714
7.53742e+07	8.61806	105.063	111.687
7.53748e+07	8.625	105.147	111.66
7.53754e+07	8.63194	105.232	111.633
7.5376e+07	8.63889	105.317	111.607
7.53766e+07	8.64583	105.401	111.581
7.53772e+07	8.65278	105.486	111.555
7.53778e+07	8.65972	105.571	111.53
7.53784e+07	8.66667	105.655	111.505
7.5379e+07	8.67361	105.74	111.48
7.53796e+07	8.68056	105.825	111.455
7.53802e+07	8.6875	105.909	111.431
7.53808e+07	8.69444	105.994	111.407
7.53814e+07	8.70139	106.079	111.383
7.5382e+07	8.70833	106.163	111.359
7.53826e+07	8.71528	106.248	111.336
7.53832e+07	8.72222	106.333	111.313
7.53838e+07	8.72917	106.417	111.29
7.53844e+07	8.73611	106.502	111.267
7.5385e+07	8.74306	106.587	111.245
7.53856e+07	8.75	106.671	111.223
7.53862e+07	8.75694	106.756	111.201
7.53868e+07	8.76389	106.841	111.179
7.53874e+07	8.77083	106.925	111.158
7.5388e+07	8.77778	107.01	111.136
7.53886e+07	8.78472	107.094	111.115
7.53892e+07	8.79167	107.179	111.094
7.53898e+07	8.79861	107.264	111.073
7.53904e+07	8.80556	107.348	111.053
7.5391e+07	8.8125	107.433	111.033
7.53916e+07	8.81944	107.518	111.012
7.53922e+07	8.82639	107.602	110.992
7.53928e+07	8.83333	107.687	110.973
7.53934e+07	8.84028	107.772	110.953
7.5394e+07	8.84722	107.856	110.933
7.53946e+07	8.85417	107.941	110.914
7.53952e+07	8.86111	108.026	110.895
7.53958e+07	8.86806	108.11	110.876
7.53964e+07	8.875	108.195	110.857
7.5397e+07	8.88194	108.28	110.839
7.53976e+07	8.88889	108.364	110.82
7.53982e+07	8.89583	108.449	110.802
7.53988e+07	8.90278	108.534	110.784
7.53994e+07	8.90972	108.618	110.765
7.54e+07	8.91667	108.703	110.748
7.54006e+07	8.92361	108.788	110.73
7.54012e+07	8.93056	108.872	110.712
7.54018e+07	8.9375	108.957	110.695
7.54024e+07	8.94444	109.042	110.677
7.5403e+07	8.95139	109.126	110.66
7.54036e+07	8.95833	109.211	110.643
7.54042e+07	8.96528	109.296	110.626
7.54048e+07	8.97222	109.38	110.609
7.54054e+07	8.97917	109.465	110.593
7.5406e+07	8.98611	109.55	110.576
7.54066e+07	8.99306	109.634	110.559
7.54072e+07	9	109.719	110.543
7.54078e+07	9.00694	109.804	110.527
7.54084e+07	9.01389	109.888	110.511
7.5409e+07	9.02083	109.973	110.495
7.54096e+07	9.02778	110.058	110.479
7.54102e+07	9.03472	110.142	110.463
7.54108e+07	9.04167	110.227	110.447
7.54114e+07	9.04861	110.312	110.432
7.5412e+07	9.05556	110.396	110.416
7.54126e+07	9.0625	110.481	110.401
7.54132e+07	9.06944	110.566	110.386
7.54138e+07	9.07639	110.65	110.371
7.54144e+07	9.08333	110.735	110.355
7.5415e+07	9.09028	110.82	110.341
7.54156e+07	9.09722	110.904	110.326
7.54162e+07	9.10417	110.989	110.311
7.54168e+07	9.11111	111.073	110.296
7.54174e+07	9.11806	111.158	110.282
7.5418e+07	9.125	111.243	110.267
7.54186e+07	9.13194	111.327	110.253
7.54192e+07	9.13889	111.412	110.238
7.54198e+07	9.14583	111.497	110.224
7.54204e+07	9.15278	111.581	110.21
7.5421e+07	9.15972	111.666	110.196
7.54216e+07	9.16667	111.751	110.182
7.54222e+07	9.17361	111.835	110.168
7.54228e+07	9.18056	111.92	110.154
7.54234e+07	9.1875	112.005	110.14
7.5424e+07	9.19444	112.089	110.126
7.54246e+07	9.20139	112.174	110.113
7.54252e+07	9.20833	112.259	110.099
7.54258e+07	9.21528	112.343	110.086
7.54264e+07	9.22222	112.428	110.072
7.5427e+07	9.22917	112.513	110.059
7.54276e+07	9.23611	112.597	110.046
7.54282e+07	9.24306	112.682	110.032
7.54288e+07	9.25	112.767	110.019
7.54294e+07	9.25694	112.851	110.006
7.543e+07	9.26389	112.936	109.993
7.54306e+07	9.27083	113.021	109.98
7.54312e+07	9.27778	113.105	109.967
7.54318e+07	9.28472	113.19	109.955
7.54324e+07	9.29167	113.275	109.942
7.5433e+07	9.29861	113.359	109.929
7.54336e+07	9.30556	113.444	109.916
7.54342e+07	9.3125	113.529	109.904
7.54348e+07	9.31944	113.613	109.891
7.54354e+07	9.32639	113.698	109.879
7.5436e+07	9.33333	113.783	109.866
7.54366e+07	9.34028	113.867	109.854
7.54372e+07	9.34722	113.952	109.842
7.54378e+07	9.35417	114.037	109.83
7.54384e+07	9.36111	114.121	109.817
7.5439e+07	9.36806	114.206	109.805
7.54396e+07	9.375	114.291	109.793
7.54402e+07	9.38194	114.375	109.781
7.54408e+07	9.38889	114.46	109.769
7.54414e+07	9.39583	114.545	109.757
7.5442e+07	9.40278	114.629	109.745
7.54426e+07	9.40972	114.714	109.734
7.54432e+07	9.41667	114.799	109.722
7.54438e+07	9.42361	114.883	109.71
7.54444e+07	9.43056	114.968	109.698
7.5445e+07	9.4375	115.052	109.687
7.54456e+07	9.44444	115.137	109.675
7.54462e+07	9.45139	115.222	109.664
7.54468e+07	9.45833	115.306	109.652
7.54474e+07	9.46528	115.391	109.641
7.5448e+07	9.47222	115.476	109.629
7.54486e+07	9.47917	115.56	109.618
7.54492e+07	9.48611	115.645	109.607
7.54498e+07	9.49306	115.73	109.596
7.54504e+07	9.5	115.814	109.584
7.5451e+07	9.50694	115.899	109.573
7.54516e+07	9.51389	115.984	109.562
7.54522e+07	9.52083	116.068	109.551
7.54528e+07	9.52778	116.153	109.54
7.54534e+07	9.53472	116.238	109.529
7.5454e+07	9.54167	116.322	109.518
7.54546e+07	9.54861	116.407	109.507
7.54552e+07	9.55556	116.492	109.496
7.54558e+07	9.5625	116.576	109.485
7.54564e+07	9.56944	116.661	109.475
7.5457e+07	9.57639	116.746	109.464
7.54576e+07	9.58333	116.83	109.453
7.54582e+07	9.59028	116.915	109.442
7.54588e+07	9.59722	117	109.432
7.54594e+07	9.60417	117.084	109.421
7.546e+07	9.61111	117.169	109.411
7.54606e+07	9.61806	117.254	109.4
7.54612e+07	9.625	117.338	109.389
7.54618e+07	9.63194	117.423	109.379
7.54624e+07	9.63889	117.508	109.369
7.5463e+07	9.64583	117.592	109.358
7.54636e+07	9.65278	117.677	109.348
7.54642e+07	9.65972	117.762	109.337
7.54648e+07	9.66667	117.846	109.327
7.54654e+07	9.67361	117.931	109.317
7.5466e+07	9.68056	118.016	109.307
7.54666e+07	9.6875	118.1	109.296
7.54672e+07	9.69444	118.185	109.286
7.54678e+07	9.70139	118.27	109.276
7.54684e+07	9.70833	118.354	109.266
7.5469e+07	9.71528	118.439	109.256
7.54696e+07	9.72222	118.524	109.246
7.54702e+07	9.72917	118.608	109.236
7.54708e+07	9.73611	118.693	109.226
7.54714e+07	9.74306	118.778	109.216
7.5472e+07	9.75	118.862	109.206
7.54726e+07	9.75694	118.947	109.196
7.54732e+07	9.76389	119.031	109.186
7.54738e+07	9.77083	119.116	109.176
7.54744e+07	9.77778	119.201	109.166
7.5475e+07	9.78472	119.285	109.157
7.54756e+07	9.79167	119.37	109.147
7.54762e+07	9.79861	119.455	109.137
7.54768e+07	9.80556	119.539	109.127
7.54774e+07	9.8125	119.624	109.118
7.5478e+07	9.81944	119.709	109.108
7.54786e+07	9.82639	119.793	109.098
7.54792e+07	9.83333	119.878	109.089
7.54798e+07	9.84028	119.963	109.079
7.54804e+07	9.84722	120.047	109.069
7.5481e+07	9.85417	120.132	109.06
7.54816e+07	9.86111	120.217	109.05
7.54822e+07	9.86806	120.301	109.041
7.54828e+07	9.875	120.386	109.031
7.54834e+07	9.88194	120.471	109.022
7.5484e+07	9.88889	120.555	109.013
7.54846e+07	9.89583	120.64	109.003
7.54852e+07	9.90278	120.725	108.994
7.54858e+07	9.90972	120.809	108.984
7.54864e+07	9.91667	120.894	108.975
7.5487e+07	9.92361	120.979	108.966
7.54876e+07	9.93056	121.063	108.957
7.54882e+07	9.9375	121.148	108.947
7.54888e+07	9.94444	121.233	108.938
7.54894e+07	9.95139	121.317	108.929
7.549e+07	9.95833	121.402	108.92
7.54906e+07	9.96528	121.487	108.91
7.54912e+07	9.97222	121.571	108.901
7.54918e+07	9.97917	121.656	108.892
7.54924e+07	9.98611	121.741	108.883
7.5493e+07	9.99306	121.825	108.874
7.54936e+07	10	121.91	108.865
7.54942e+07	10.0069	121.995	108.856
7.54948e+07	10.0139	122.079	108.847
7.54954e+07	10.0208	122.164	108.838
7.5496e+07	10.0278	122.249	108.829
7.54966e+07	10.0347	122.333	108.82
7.54972e+07	10.0417	122.418	108.811
7.54978e+07	10.0486	122.503	108.802
7.54984e+07	10.0556	122.587	108.793
7.5499e+07	10.0625	122.672	108.784
7.54996e+07	10.0694	122.757	108.775
7.55002e+07	10.0764	122.841	108.766
7.55008e+07	10.0833	122.926	108.758
7.55014e+07	10.0903	123.01	108.749
7.5502e+07	10.0972	123.095	108.74
7.55026e+07	10.1042	123.18	108.731
7.55032e+07	10.1111	123.264	108.722
7.55038e+07	10.1181	123.349	108.714
7.55044e+07	10.125	123.434	108.705
7.5505e+07	10.1319	123.518	108.696
7.55056e+07	10.1389	123.603	108.687
7.55062e+07	10.1458	123.688	108.679
7.55068e+07	10.1528	123.772	108.67
7.55074e+07	10.1597	123.857	108.662
7.5508e+07	10.1667	123.942	108.653
7.55086e+07	10.1736	124.026	108.644
7.55092e+07	10.1806	124.111	108.636
7.55098e+07	10.1875	124.196	108.627
7.55104e+07	10.1944	124.28	108.619
7.5511e+07	10.2014	124.365	108.61
7.55116e+07	10.2083	124.45	108.602
7.55122e+07	10.2153	124.534	108.593
7.55128e+07	10.2222	124.619	108.585
7.55134e+07	10.2292	124.704	108.576
7.5514e+07	10.2361	124.788	108.568
7.55146e+07	10.2431	124.873	108.559
7.55152e+07	10.25	124.958	108.551
7.55158e+07	10.2569	125.042	108.542
7.55164e+07	10.2639	125.127	108.534
7.5517e+07	10.2708	125.212	108.526
7.55176e+07	10.2778	125.296	108.517
7.55182e+07	10.2847	125.381	108.509
7.55188e+07	10.2917	125.466	108.501
7.55194e+07	10.2986	125.55	108.492
7.552e+07	10.3056	125.635	108.484
7.55206e+07	10.3125	125.72	108.476
7.55212e+07	10.3194	125.804	108.467
7.55218e+07	10.3264	125.889	108.459
7.55224e+07	10.3333	125.974	108.451
7.5523e+07	10.3403	126.058	108.443
7.55236e+07	10.3472	126.143	108.434
7.55242e+07	10.3542	126.228	108.426
7.55248e+07	10.3611	126.312	108.418
7.55254e+07	10.3681	126.397	108.41
7.5526e+07	10.375	126.482	108.402
7.55266e+07	10.3819	126.566	108.394
7.55272e+07	10.3889	126.651	108.385
7.55278e+07	10.3958	126.736	108.377
7.55284e+07	10.4028	126.82	108.369
7.5529e+07	10.4097	126.905	108.361
7.55296e+07	10.4167	126.99	108.353
7.55302e+07	10.4236	127.074	108.345
7.55308e+07	10.4306	127.159	108.337
7.55314e+07	10.4375	127.243	108.329
7.5532e+07	10.4444	127.328	108.321
7.55326e+07	10.4514	127.413	108.313
7.55332e+07	10.4583	127.497	108.305
7.55338e+07	10.4653	127.582	108.297
7.55344e+07	10.4722	127.667	108.289
7.5535e+07	10.4792	127.751	108.281
7.55356e+07	10.4861	127.836	108.273
7.55362e+07	10.4931	127.921	108.265
7.55368e+07	10.5	128.005	108.257
7.55374e+07	10.5069	128.09	108.249
7.5538e+07	10.5139	128.175	108.242
7.55386e+07	10.5208	128.259	108.234
7.55392e+07	10.5278	128.344	108.226
7.55398e+07	10.5347	128.429	108.218
7.55404e+07	10.5417	128.513	108.21
7.5541e+07	10.5486	128.598	108.202
7.55416e+07	10.5556	128.683	108.195
7.55422e+07	10.5625	128.767	108.187
7.55428e+07	10.5694	128.852	108.179
7.55434e+07	10.5764	128.937	108.171
7.5544e+07	10.5833	129.021	108.163
7.55446e+07	10.5903	129.106	108.156
7.55452e+07	10.5972	129.191	108.148
7.55458e+07	10.6042	129.275	108.14
7.55464e+07	10.6111	129.36	108.133
7.5547e+07	10.6181	129.445	108.125
7.55476e+07	10.625	129.529	108.117
7.55482e+07	10.6319	129.614	108.109
7.55488e+07	10.6389	129.699	108.102
7.55494e+07	10.6458	129.783	108.094
7.555e+07	10.6528	129.868	108.087
7.55506e+07	10.6597	129.953	108.079
7.55512e+07	10.6667	130.037	108.071
7.55518e+07	10.6736	130.122	108.064
7.55524e+07	10.6806	130.207	108.056
7.5553e+07	10.6875	130.291	108.049
7.55536e+07	10.6944	130.376	108.041
7.55542e+07	10.7014	130.461	108.033
7.55548e+07	10.7083	130.545	108.026
7.55554e+07	10.7153	130.63	108.018
7.5556e+07	10.7222	130.715	108.011
7.55566e+07	10.7292	130.799	108.003
7.55572e+07	10.7361	130.884	107.996
7.55578e+07	10.7431	130.969	107.988
7.55584e+07	10.75	131.053	107.981
7.5559e+07	10.7569	131.138	107.973
7.55596e+07	10.7639	131.222	107.966
7.55602e+07	10.7708	131.307	107.958
7.55608e+07	10.7778	131.392	107.951
7.55614e+07	10.7847	131.476	107.944
7.5562e+07	10.7917	131.561	107.936
7.55626e+07	10.7986	131.646	107.929
7.55632e+07	10.8056	131.73	107.921
7.55638e+07	10.8125	131.815	107.914
7.55644e+07	10.8194	131.9	107.907
7.5565e+07	10.8264	131.984	107.899
7.55656e+07	10.8333	132.069	107.892
7.55662e+07	10.8403	132.154	107.885
7.55668e+07	10.8472	132.238	107.877
7.55674e+07	10.8542	132.323	107.87
7.5568e+07	10.8611	132.408	107.863
7.55686e+07	10.8681	132.492	107.855
7.55692e+07	10.875	132.577	107.848
7.55698e+07	10.8819	132.662	107.841
7.55704e+07	10.8889	132.746	107.833
7.5571e+07	10.8958	132.831	107.826
7.55716e+07	10.9028	132.916	107.819
7.55722e+07	10.9097	133	107.812
7.55728e+07	10.9167	133.085	107.804
7.55734e+07	10.9236	133.17	107.797
7.5574e+07	10.9306	133.254	107.79
7.55746e+07	10.9375	133.339	107.783
7.55752e+07	10.9444	133.424	107.776
7.55758e+07	10.9514	133.508	107.768
7.55764e+07	10.9583	133.593	107.761
7.5577e+07	10.9653	133.678	107.754
7.55776e+07	10.9722	133.762	107.747
7.55782e+07	10.9792	133.847	107.74
7.55788e+07	10.9861	133.932	107.733
7.55794e+07	10.9931	134.016	107.726
7.558e+07	11	134.101	107.718
7.55806e+07	11.0069	134.186	107.711
7.55812e+07	11.0139	134.27	107.704
7.55818e+07	11.0208	134.355	107.697
7.55824e+07	11.0278	134.44	107.69
7.5583e+07	11.0347	134.524	107.683
7.55836e+07	11.0417	134.609	107.676
7.55842e+07	11.0486	134.694	107.669
7.55848e+07	11.0556	134.778	107.662
7.55854e+07	11.0625	134.863	107.655
7.5586e+07	11.0694	134.948	107.648
7.55866e+07	11.0764	135.032	107.641
7.55872e+07	11.0833	135.117	107.634
7.55878e+07	11.0903	135.201	107.627
7.55884e+07	11.0972	135.286	107.62
7.5589e+07	11.1042	135.371	107.613
7.55896e+07	11.1111	135.455	107.606
7.55902e+07	11.1181	135.54	107.599
7.55908e+07	11.125	135.625	107.592
7.55914e+07	11.1319	135.709	107.585
7.5592e+07	11.1389	135.794	107.578
7.55926e+07	11.1458	135.879	107.571
7.55932e+07	11.1528	135.963	107.564
7.55938e+07	11.1597	136.048	107.557
7.55944e+07	11.1667	136.133	107.55
7.5595e+07	11.1736	136.217	107.544
7.55956e+07	11.1806	136.302	107.537
7.55962e+07	11.1875	136.387	107.53
7.55968e+07	11.1944	136.471	107.523
7.55974e+07	11.2014	136.556	107.516
7.5598e+07	11.2083	136.641	107.509
7.55986e+07	11.2153	136.725	107.502
7.55992e+07	11.2222	136.81	107.496
7.55998e+07	11.2292	136.895	107.489
7.56004e+07	11.2361	136.979	107.482
7.5601e+07	11.2431	137.064	107.475
7.56016e+07	11.25	137.149	107.468
7.56022e+07	11.2569	137.233	107.462
7.56028e+07	11.2639	137.318	107.455
7.56034e+07	11.2708	137.403	107.448
7.5604e+07	11.2778	137.487	107.441
7.56046e+07	11.2847	137.572	107.435
7.56052e+07	11.2917	137.657	107.428
7.56058e+07	11.2986	137.741	107.421
7.56064e+07	11.3056	137.826	107.414
7.5607e+07	11.3125	137.911	107.408
7.56076e+07	11.3194	137.995	107.401
7.56082e+07	11.3264	138.08	107.394
7.56088e+07	11.3333	138.165	107.388
7.56094e+07	11.3403	138.249	107.381
7.561e+07	11.3472	138.334	107.374
7.56106e+07	11.3542	138.419	107.368
7.56112e+07	11.3611	138.503	107.361
7.56118e+07	11.3681	138.588	107.354
7.56124e+07	11.375	138.673	107.348
7.5613e+07	11.3819	138.757	107.341
7.56136e+07	11.3889	138.842	107.334
7.56142e+07	11.3958	138.927	107.328
7.56148e+07	11.4028	139.011	107.321
7.56154e+07	11.4097	139.096	107.314
7.5616e+07	11.4167	139.18	107.308
7.56166e+07	11.4236	139.265	107.301
7.56172e+07	11.4306	139.35	107.295
7.56178e+07	11.4375	139.434	107.288
7.56184e+07	11.4444	139.519	107.282
7.5619e+07	11.4514	139.604	107.275
7.56196e+07	11.4583	139.688	107.268
7.56202e+07	11.4653	139.773	107.262
7.56208e+07	11.4722	139.858	107.255
7.56214e+07	11.4792	139.942	107.249
7.5622e+07	11.4861	140.027	107.242
7.56226e+07	11.4931	140.112	107.236
7.56232e+07	11.5	140.196	107.229
7.56238e+07	11.5069	140.281	107.223
7.56244e+07	11.5139	140.366	107.216
7.5625e+07	11.5208	140.45	107.21
7.56256e+07	11.5278	140.535	107.203
7.56262e+07	11.5347	140.62	107.197
7.56268e+07	11.5417	140.704	107.19
7.56274e+07	11.5486	140.789	107.184
7.5628e+07	11.5556	140.874	107.178
7.56286e+07	11.5625	140.958	107.171
7.56292e+07	11.5694	141.043	107.165
7.56298e+07	11.5764	141.128	107.158
7.56304e+07	11.5833	141.212	107.152
7.5631e+07	11.5903	141.297	107.145
7.56316e+07	11.5972	141.382	107.139
7.56322e+07	11.6042	141.466	107.133
7.56328e+07	11.6111	141.551	107.126
7.56334e+07	11.6181	141.636	107.12
7.5634e+07	11.625	141.72	107.114
7.56346e+07	11.6319	141.805	107.107
7.56352e+07	11.6389	141.89	107.101
7.56358e+07	11.6458	141.974	107.094
7.56364e+07	11.6528	142.059	107.088
7.5637e+07	11.6597	142.144	107.082
7.56376e+07	11.6667	142.228	107.075
7.56382e+07	11.6736	142.313	107.069
7.56388e+07	11.6806	142.398	107.063
7.56394e+07	11.6875	142.482	107.056
7.564e+07	11.6944	142.567	107.05
7.56406e+07	11.7014	142.652	107.044
7.56412e+07	11.7083	142.736	107.038
7.56418e+07	11.7153	142.821	107.031
7.56424e+07	11.7222	142.906	107.025
7.5643e+07	11.7292	142.99	107.019
7.56436e+07	11.7361	143.075	107.013
7.56442e+07	11.7431	143.159	107.006
7.56448e+07	11.75	143.244	107
7.56454e+07	11.7569	143.329	106.994
7.5646e+07	11.7639	143.413	106.988
7.56466e+07	11.7708	143.498	106.981
7.56472e+07	11.7778	143.583	106.975
7.56478e+07	11.7847	143.667	106.969
7.56484e+07	11.7917	143.752	106.963
7.5649e+07	11.7986	143.837	106.957
7.56496e+07	11.8056	143.921	106.95
7.56502e+07	11.8125	144.006	106.944
7.56508e+07	11.8194	144.091	106.938
7.56514e+07	11.8264	144.175	106.932
7.5652e+07	11.8333	144.26	106.926
7.56526e+07	11.8403	144.345	106.919
7.56532e+07	11.8472	144.429	106.913
7.56538e+07	11.8542	144.514	106.907
7.56544e+07	11.8611	144.599	106.901
7.5655e+07	11.8681	144.683	106.895
7.56556e+07	11.875	144.768	106.889
7.56562e+07	11.8819	144.853	106.883
7.56568e+07	11.8889	144.937	106.877
7.56574e+07	11.8958	145.022	106.87
7.5658e+07	11.9028	145.107	106.864
7.56586e+07	11.9097	145.191	106.858
7.56592e+07	11.9167	145.276	106.852
7.56598e+07	11.9236	145.361	106.846
7.56604e+07	11.9306	145.445	106.84
7.5661e+07	11.9375	145.53	106.834
7.56616e+07	11.9444	145.615	106.828
7.56622e+07	11.9514	145.699	106.822
7.56628e+07	11.9583	145.784	106.816
7.56634e+07	11.9653	145.869	106.81
7.5664e+07	11.9722	145.953	106.804
7.56646e+07	11.9792	146.038	106.798
7.56652e+07	11.9861	146.123	106.792
7.56658e+07	11.9931	146.207	106.786
7.56664e+07	12	146.292	106.78
7.5667e+07	12.0069	146.377	106.774
7.56676e+07	12.0139	146.461	106.768
7.56682e+07	12.0208	146.546	106.762
7.56688e+07	12.0278	146.631	106.756
7.56694e+07	12.0347	146.715	106.75
7.567e+07	12.0417	146.8	106.744
7.56706e+07	12.0486	146.885	106.738
7.56712e+07	12.0556	146.969	106.732
7.56718e+07	12.0625	147.054	106.726
7.56724e+07	12.0694	147.139	106.72
7.5673e+07	12.0764	147.223	106.714
7.56736e+07	12.0833	147.308	106.708
7.56742e+07	12.0903	147.392	106.702
7.56748e+07	12.0972	147.477	106.696
7.56754e+07	12.1042	147.562	106.69
7.5676e+07	12.1111	147.646	106.684
7.56766e+07	12.1181	147.731	106.678
7.56772e+07	12.125	147.816	106.672
7.56778e+07	12.1319	147.9	106.667
7.56784e+07	12.1389	147.985	106.661
7.5679e+07	12.1458	148.07	106.655
7.56796e+07	12.1528	148.154	106.649
7.56802e+07	12.1597	148.239	106.643
7.56808e+07	12.1667	148.324	106.637
7.56814e+07	12.1736	148.408	106.631
7.5682e+07	12.1806	148.493	106.625
7.56826e+07	12.1875	148.578	106.62
7.56832e+07	12.1944	148.662	106.614
7.56838e+07	12.2014	148.747	106.608
7.56844e+07	12.2083	148.832	106.602
7.5685e+07	12.2153	148.916	106.596
7.56856e+07	12.2222	149.001	106.59
7.56862e+07	12.2292	149.086	106.585
7.56868e+07	12.2361	149.17	106.579
7.56874e+07	12.2431	149.255	106.573
7.5688e+07	12.25	149.34	106.567
7.56886e+07	12.2569	149.424	106.561
7.56892e+07	12.2639	149.509	106.556
7.56898e+07	12.2708	149.594	106.55
7.56904e+07	12.2778	149.678	106.544
7.5691e+07	12.2847	149.763	106.538
7.56916e+07	12.2917	149.848	106.533
7.56922e+07	12.2986	149.932	106.527
7.56928e+07	12.3056	150.017	106.521
7.56934e+07	12.3125	150.102	106.515
7.5694e+07	12.3194	150.186	106.51
7.56946e+07	12.3264	150.271	106.504
7.56952e+07	12.3333	150.356	106.498
7.56958e+07	12.3403	150.44	106.492
7.56964e+07	12.3472	150.525	106.487
7.5697e+07	12.3542	150.61	106.481
7.56976e+07	12.3611	150.694	106.475
7.56982e+07	12.3681	150.779	106.47
7.56988e+07	12.375	150.864	106.464
7.56994e+07	12.3819	150.948	106.458
7.57e+07	12.3889	151.033	106.452
7.57006e+07	12.3958	151.118	106.447
7.57012e+07	12.4028	151.202	106.441
7.57018e+07	12.4097	151.287	106.435
7.57024e+07	12.4167	151.371	106.43
7.5703e+07	12.4236	151.456	106.424
7.57036e+07	12.4306	151.541	106.418
7.57042e+07	12.4375	151.625	106.413
7.57048e+07	12.4444	151.71	106.407
7.57054e+07	12.4514	151.795	106.402
7.5706e+07	12.4583	151.879	106.396
7.57066e+07	12.4653	151.964	106.39
7.57072e+07	12.4722	152.049	106.385
7.57078e+07	12.4792	152.133	106.379
7.57084e+07	12.4861	152.218	106.373
7.5709e+07	12.4931	152.303	106.368
7.57096e+07	12.5	152.387	106.362
7.57102e+07	12.5069	152.472	106.357
7.57108e+07	12.5139	152.557	106.351
7.57114e+07	12.5208	152.641	106.345
7.5712e+07	12.5278	152.726	106.34
7.57126e+07	12.5347	152.811	106.334
7.57132e+07	12.5417	152.895	106.329
7.57138e+07	12.5486	152.98	106.323
7.57144e+07	12.5556	153.065	106.318
7.5715e+07	12.5625	153.149	106.312
7.57156e+07	12.5694	153.234	106.307
7.57162e+07	12.5764	153.319	106.301
7.57168e+07	12.5833	153.403	106.295
7.57174e+07	12.5903	153.488	106.29
7.5718e+07	12.5972	153.573	106.284
7.57186e+07	12.6042	153.657	106.279
7.57192e+07	12.6111	153.742	106.273
7.57198e+07	12.6181	153.827	106.268
7.57204e+07	12.625	153.911	106.262
7.5721e+07	12.6319	153.996	106.257
7.57216e+07	12.6389	154.081	106.251
7.57222e+07	12.6458	154.165	106.246
7.57228e+07	12.6528	154.25	106.24
7.57234e+07	12.6597	154.335	106.235
7.5724e+07	12.6667	154.419	106.229
7.57246e+07	12.6736	154.504	106.224
7.57252e+07	12.6806	154.589	106.218
7.57258e+07	12.6875	154.673	106.213
7.57264e+07	12.6944	154.758	106.208
7.5727e+07	12.7014	154.843	106.202
7.57276e+07	12.7083	154.927	106.197
7.57282e+07	12.7153	155.012	106.191
7.57288e+07	12.7222	155.097	106.186
7.57294e+07	12.7292	155.181	106.18
7.573e+07	12.7361	155.266	106.175
7.57306e+07	12.7431	155.35	106.17
7.57312e+07	12.75	155.435	106.164
7.57318e+07	12.7569	155.52	106.159
7.57324e+07	12.7639	155.604	106.153
7.5733e+07	12.7708	155.689	106.148
7.57336e+07	12.7778	155.774	106.142
7.57342e+07	12.7847	155.858	106.137
7.57348e+07	12.7917	155.943	106.132
7.57354e+07	12.7986	156.028	106.126
7.5736e+07	12.8056	156.112	106.121
7.57366e+07	12.8125	156.197	106.116
7.57372e+07	12.8194	156.282	106.11
7.57378e+07	12.8264	156.366	106.105
7.57384e+07	12.8333	156.451	106.1
7.5739e+07	12.8403	156.536	106.094
7.57396e+07	12.8472	156.62	106.089
7.57402e+07	12.8542	156.705	106.084
7.57408e+07	12.8611	156.79	106.078
7.57414e+07	12.8681	156.874	106.073
7.5742e+07	12.875	156.959	106.068
7.57426e+07	12.8819	157.044	106.062
7.57432e+07	12.8889	157.128	106.057
7.57438e+07	12.8958	157.213	106.052
7.57444e+07	12.9028	157.298	106.046
7.5745e+07	12.9097	157.382	106.041
7.57456e+07	12.9167	157.467	106.036
7.57462e+07	12.9236	157.552	106.031
7.57468e+07	12.9306	157.636	106.025
7.57474e+07	12.9375	157.721	106.02
7.5748e+07	12.9444	157.806	106.015
7.57486e+07	12.9514	157.89	106.01
7.57492e+07	12.9583	157.975	106.004
7.57498e+07	12.9653	158.06	105.999
7.57504e+07	12.9722	158.144	105.994
7.5751e+07	12.9792	158.229	105.989
7.57516e+07	12.9861	158.314	105.984
7.57522e+07	12.9931	158.398	105.978
7.57528e+07	13	158.483	105.973
7.57534e+07	13.0069	158.568	105.968
7.5754e+07	13.0139	158.652	105.963
7.57546e+07	13.0208	158.737	105.958
7.57552e+07	13.0278	158.822	105.952
7.57558e+07	13.0347	158.906	105.947
7.57564e+07	13.0417	158.991	105.942
7.5757e+07	13.0486	159.076	105.937
7.57576e+07	13.0556	159.16	105.932
7.57582e+07	13.0625	159.245	105.927
7.57588e+07	13.0694	159.329	105.921
7.57594e+07	13.0764	159.414	105.916
7.576e+07	13.0833	159.499	105.911
7.57606e+07	13.0903	159.583	105.906
7.57612e+07	13.0972	159.668	105.901
7.57618e+07	13.1042	159.753	105.896
7.57624e+07	13.1111	159.837	105.891
7.5763e+07	13.1181	159.922	105.886
7.57636e+07	13.125	160.007	105.88
7.57642e+07	13.1319	160.091	105.875
7.57648e+07	13.1389	160.176	105.87
7.57654e+07	13.1458	160.261	105.865
7.5766e+07	13.1528	160.345	105.86
7.57666e+07	13.1597	160.43	105.855
7.57672e+07	13.1667	160.515	105.85
7.57678e+07	13.1736	160.599	105.845
7.57684e+07	13.1806	160.684	105.84
7.5769e+07	13.1875	160.769	105.835
7.57696e+07	13.1944	160.853	105.83
7.57702e+07	13.2014	160.938	105.825
7.57708e+07	13.2083	161.023	105.82
7.57714e+07	13.2153	161.107	105.815
7.5772e+07	13.2222	161.192	105.81
7.57726e+07	13.2292	161.277	105.805
7.57732e+07	13.2361	161.361	105.8
7.57738e+07	13.2431	161.446	105.795
7.57744e+07	13.25	161.531	105.79
7.5775e+07	13.2569	161.615	105.785
7.57756e+07	13.2639	161.7	105.78
7.57762e+07	13.2708	161.785	105.775
7.57768e+07	13.2778	161.869	105.77
7.57774e+07	13.2847	161.954	105.765
7.5778e+07	13.2917	162.039	105.76
7.57786e+07	13.2986	162.123	105.755
7.57792e+07	13.3056	162.208	105.75
7.57798e+07	13.3125	162.293	105.745
7.57804e+07	13.3194	162.377	105.74
7.5781e+07	13.3264	162.462	105.735
7.57816e+07	13.3333	162.547	105.73
7.57822e+07	13.3403	162.631	105.725
7.57828e+07	13.3472	162.716	105.72
7.57834e+07	13.3542	162.801	105.715
7.5784e+07	13.3611	162.885	105.71
7.57846e+07	13.3681	162.97	105.705
7.57852e+07	13.375	163.055	105.7
7.57858e+07	13.3819	163.139	105.695
7.57864e+07	13.3889	163.224	105.69
7.5787e+07	13.3958	163.308	105.685
7.57876e+07	13.4028	163.393	105.68
7.57882e+07	13.4097	163.478	105.676
7.57888e+07	13.4167	163.562	105.671
7.57894e+07	13.4236	163.647	105.666
7.579e+07	13.4306	163.732	105.661
7.57906e+07	13.4375	163.816	105.656
7.57912e+07	13.4444	163.901	105.651
7.57918e+07	13.4514	163.986	105.646
7.57924e+07	13.4583	164.07	105.641
7.5793e+07	13.4653	164.155	105.636
7.57936e+07	13.4722	164.24	105.632
7.57942e+07	13.4792	164.324	105.627
7.57948e+07	13.4861	164.409	105.622
7.57954e+07	13.4931	164.494	105.617
7.5796e+07	13.5	164.578	105.612
7.57966e+07	13.5069	164.663	105.607
7.57972e+07	13.5139	164.748	105.603
7.57978e+07	13.5208	164.832	105.598
7.57984e+07	13.5278	164.917	105.593
7.5799e+07	13.5347	165.002	105.588
7.57996e+07	13.5417	165.086	105.583
7.58002e+07	13.5486	165.171	105.578
7.58008e+07	13.5556	165.256	105.574
7.58014e+07	13.5625	165.34	105.569
7.5802e+07	13.5694	165.425	105.564
7.58026e+07	13.5764	165.51	105.559
7.58032e+07	13.5833	165.594	105.554
7.58038e+07	13.5903	165.679	105.55
7.58044e+07	13.5972	165.764	105.545
7.5805e+07	13.6042	165.848	105.54
7.58056e+07	13.6111	165.933	105.535
7.58062e+07	13.6181	166.018	105.53
7.58068e+07	13.625	166.102	105.526
7.58074e+07	13.6319	166.187	105.521
7.5808e+07	13.6389	166.272	105.516
7.58086e+07	13.6458	166.356	105.511
7.58092e+07	13.6528	166.441	105.507
7.58098e+07	13.6597	166.526	105.502
7.58104e+07	13.6667	166.61	105.497
7.5811e+07	13.6736	166.695	105.492
7.58116e+07	13.6806	166.78	105.488
7.58122e+07	13.6875	166.864	105.483
7.58128e+07	13.6944	166.949	105.478
7.58134e+07	13.7014	167.034	105.473
7.5814e+07	13.7083	167.118	105.469
7.58146e+07	13.7153	167.203	105.464
7.58152e+07	13.7222	167.288	105.459
7.58158e+07	13.7292	167.372	105.454
7.58164e+07	13.7361	167.457	105.45
7.5817e+07	13.7431	167.541	105.445
7.58176e+07	13.75	167.626	105.44
7.58182e+07	13.7569	167.711	105.436
7.58188e+07	13.7639	167.795	105.431
7.58194e+07	13.7708	167.88	105.426
7.582e+07	13.7778	167.965	105.422
7.58206e+07	13.7847	168.049	105.417
7.58212e+07	13.7917	168.134	105.412
7.58218e+07	13.7986	168.219	105.407
7.58224e+07	13.8056	168.303	105.403
7.5823e+07	13.8125	168.388	105.398
7.58236e+07	13.8194	168.473	105.393
7.58242e+07	13.8264	168.557	105.389
7.58248e+07	13.8333	168.642	105.384
7.58254e+07	13.8403	168.727	105.379
7.5826e+07	13.8472	168.811	105.375
7.58266e+07	13.8542	168.896	105.37
7.58272e+07	13.8611	168.981	105.366
7.58278e+07	13.8681	169.065	105.361
7.58284e+07	13.875	169.15	105.356
[truncated: 2,255 more rows]

## Sheet: Figure3-c
Time, s		Longitude	Latitude 60	29.5139	Test
74629620	0	0	315.36		Longitude	Reference
74630220	0.00694444	0.0846597	315.376		0	317.3
74630820	0.0138889	0.169319	315.379		15	315.1
74631420	0.0208333	0.253979	315.373		30	305.7
74632020	0.0277778	0.338639	315.362		45	290.5
74632620	0.0347222	0.423298	315.347		60	265.2
74633220	0.0416667	0.507958	315.329		75	221.7
74633820	0.0486111	0.592618	315.309		90	140.6
74634420	0.0555556	0.677277	315.288		105	103.7
74635020	0.0625	0.761937	315.267		120	98
74635620	0.0694444	0.846597	315.245		135	95.75
74636220	0.0763889	0.931256	315.222		150	93
74636820	0.0833333	1.01592	315.199		165	90.68
74637420	0.0902778	1.10058	315.177		180	88.51
74638020	0.0972222	1.18524	315.154		195	87.79
74638620	0.104167	1.2699	315.13		210	86
74639220	0.111111	1.35455	315.107		225	84.89
74639820	0.118056	1.43921	315.084		240	83.6
74640420	0.125	1.52387	315.061		255	83
74641020	0.131944	1.60853	315.038		270	114.6
74641620	0.138889	1.69319	315.014		285	208.7
74642220	0.145833	1.77785	314.991		300	260.8
74642820	0.152778	1.86251	314.968		315	287.6
74643420	0.159722	1.94717	314.945		330	305
74644020	0.166667	2.03183	314.921		345	313.7
74644620	0.173611	2.11649	314.898		360	317.3
74645220	0.180556	2.20115	314.875
74645820	0.1875	2.28581	314.852
74646420	0.194444	2.37047	314.828
74647020	0.201389	2.45513	314.805
74647620	0.208333	2.53979	314.782
74648220	0.215278	2.62445	314.758
74648820	0.222222	2.70911	314.735
74649420	0.229167	2.79377	314.712
74650020	0.236111	2.87843	314.688
74650620	0.243056	2.96309	314.665
74651220	0.25	3.04775	314.642
74651820	0.256944	3.13241	314.618
74652420	0.263889	3.21707	314.595
74653020	0.270833	3.30173	314.571
74653620	0.277778	3.38639	314.548
74654220	0.284722	3.47105	314.525
74654820	0.291667	3.55571	314.501
74655420	0.298611	3.64037	314.478
74656020	0.305556	3.72503	314.455
7.46566e+07	0.3125	3.80969	314.431
7.46572e+07	0.319444	3.89434	314.408
7.46578e+07	0.326389	3.979	314.384
7.46584e+07	0.333333	4.06366	314.361
7.4659e+07	0.340278	4.14832	314.337
7.46596e+07	0.347222	4.23298	314.314
7.46602e+07	0.354167	4.31764	314.291
74660820	0.361111	4.4023	314.267
74661420	0.368056	4.48696	314.244
74662020	0.375	4.57162	314.22
74662620	0.381944	4.65628	314.197
74663220	0.388889	4.74094	314.173
74663820	0.395833	4.8256	314.15
74664420	0.402778	4.91026	314.126
7.4665e+07	0.409722	4.99492	314.103
7.46656e+07	0.416667	5.07958	314.079
7.46662e+07	0.423611	5.16424	314.056
7.46668e+07	0.430556	5.2489	314.032
7.46674e+07	0.4375	5.33356	314.009
7.4668e+07	0.444444	5.41822	313.985
7.46686e+07	0.451389	5.50288	313.962
7.46692e+07	0.458333	5.58754	313.938
7.46698e+07	0.465278	5.6722	313.915
7.46704e+07	0.472222	5.75686	313.891
7.4671e+07	0.479167	5.84152	313.868
7.46716e+07	0.486111	5.92618	313.844
7.46722e+07	0.493056	6.01084	313.821
7.46728e+07	0.5	6.0955	313.797
7.46734e+07	0.506944	6.18016	313.774
7.4674e+07	0.513889	6.26482	313.75
7.46746e+07	0.520833	6.34948	313.726
7.46752e+07	0.527778	6.43413	313.703
7.46758e+07	0.534722	6.51879	313.679
7.46764e+07	0.541667	6.60345	313.656
7.4677e+07	0.548611	6.68811	313.632
7.46776e+07	0.555556	6.77277	313.608
7.46782e+07	0.5625	6.85743	313.585
7.46788e+07	0.569444	6.94209	313.561
7.46794e+07	0.576389	7.02675	313.538
7.468e+07	0.583333	7.11141	313.514
7.46806e+07	0.590278	7.19607	313.49
7.46812e+07	0.597222	7.28073	313.467
7.46818e+07	0.604167	7.36539	313.443
7.46824e+07	0.611111	7.45005	313.419
7.4683e+07	0.618056	7.53471	313.396
7.46836e+07	0.625	7.61937	313.372
7.46842e+07	0.631944	7.70403	313.348
7.46848e+07	0.638889	7.78869	313.325
7.46854e+07	0.645833	7.87335	313.301
7.4686e+07	0.652778	7.95801	313.277
7.46866e+07	0.659722	8.04267	313.254
7.46872e+07	0.666667	8.12733	313.23
7.46878e+07	0.673611	8.21199	313.206
7.46884e+07	0.680556	8.29665	313.182
7.4689e+07	0.6875	8.38131	313.159
7.46896e+07	0.694444	8.46597	313.135
7.46902e+07	0.701389	8.55063	313.111
7.46908e+07	0.708333	8.63529	313.088
7.46914e+07	0.715278	8.71995	313.064
7.4692e+07	0.722222	8.80461	313.04
7.46926e+07	0.729167	8.88927	313.016
7.46932e+07	0.736111	8.97392	312.993
7.46938e+07	0.743056	9.05858	312.969
7.46944e+07	0.75	9.14324	312.945
7.4695e+07	0.756944	9.2279	312.921
7.46956e+07	0.763889	9.31256	312.897
7.46962e+07	0.770833	9.39722	312.874
7.46968e+07	0.777778	9.48188	312.85
7.46974e+07	0.784722	9.56654	312.826
7.4698e+07	0.791667	9.6512	312.802
7.46986e+07	0.798611	9.73586	312.778
7.46992e+07	0.805556	9.82052	312.755
7.46998e+07	0.8125	9.90518	312.731
7.47004e+07	0.819444	9.98984	312.707
7.4701e+07	0.826389	10.0745	312.683
7.47016e+07	0.833333	10.1592	312.659
7.47022e+07	0.840278	10.2438	312.636
7.47028e+07	0.847222	10.3285	312.612
7.47034e+07	0.854167	10.4131	312.588
7.4704e+07	0.861111	10.4978	312.564
7.47046e+07	0.868056	10.5825	312.54
7.47052e+07	0.875	10.6671	312.516
7.47058e+07	0.881944	10.7518	312.492
7.47064e+07	0.888889	10.8364	312.468
7.4707e+07	0.895833	10.9211	312.445
7.47076e+07	0.902778	11.0058	312.421
7.47082e+07	0.909722	11.0904	312.397
7.47088e+07	0.916667	11.1751	312.373
7.47094e+07	0.923611	11.2597	312.349
7.471e+07	0.930556	11.3444	312.325
7.47106e+07	0.9375	11.4291	312.301
7.47112e+07	0.944444	11.5137	312.277
7.47118e+07	0.951389	11.5984	312.253
7.47124e+07	0.958333	11.683	312.229
7.4713e+07	0.965278	11.7677	312.205
7.47136e+07	0.972222	11.8524	312.181
7.47142e+07	0.979167	11.937	312.157
7.47148e+07	0.986111	12.0217	312.133
7.47154e+07	0.993056	12.1063	312.109
7.4716e+07	1	12.191	312.085
7.47166e+07	1.00694	12.2757	312.061
7.47172e+07	1.01389	12.3603	312.037
7.47178e+07	1.02083	12.445	312.013
7.47184e+07	1.02778	12.5296	311.989
7.4719e+07	1.03472	12.6143	311.965
7.47196e+07	1.04167	12.699	311.941
7.47202e+07	1.04861	12.7836	311.917
7.47208e+07	1.05556	12.8683	311.893
7.47214e+07	1.0625	12.9529	311.869
7.4722e+07	1.06944	13.0376	311.845
7.47226e+07	1.07639	13.1222	311.821
7.47232e+07	1.08333	13.2069	311.797
7.47238e+07	1.09028	13.2916	311.773
7.47244e+07	1.09722	13.3762	311.749
7.4725e+07	1.10417	13.4609	311.725
7.47256e+07	1.11111	13.5455	311.701
7.47262e+07	1.11806	13.6302	311.677
7.47268e+07	1.125	13.7149	311.653
7.47274e+07	1.13194	13.7995	311.629
7.4728e+07	1.13889	13.8842	311.605
7.47286e+07	1.14583	13.9688	311.58
7.47292e+07	1.15278	14.0535	311.556
7.47298e+07	1.15972	14.1382	311.532
7.47304e+07	1.16667	14.2228	311.508
7.4731e+07	1.17361	14.3075	311.484
7.47316e+07	1.18056	14.3921	311.46
7.47322e+07	1.1875	14.4768	311.436
7.47328e+07	1.19444	14.5615	311.412
7.47334e+07	1.20139	14.6461	311.387
7.4734e+07	1.20833	14.7308	311.363
7.47346e+07	1.21528	14.8154	311.339
7.47352e+07	1.22222	14.9001	311.315
7.47358e+07	1.22917	14.9848	311.291
7.47364e+07	1.23611	15.0694	311.267
7.4737e+07	1.24306	15.1541	311.242
7.47376e+07	1.25	15.2387	311.218
7.47382e+07	1.25694	15.3234	311.194
7.47388e+07	1.26389	15.4081	311.17
7.47394e+07	1.27083	15.4927	311.146
7.474e+07	1.27778	15.5774	311.121
7.47406e+07	1.28472	15.662	311.097
7.47412e+07	1.29167	15.7467	311.073
7.47418e+07	1.29861	15.8314	311.049
7.47424e+07	1.30556	15.916	311.024
7.4743e+07	1.3125	16.0007	311
7.47436e+07	1.31944	16.0853	310.976
7.47442e+07	1.32639	16.17	310.952
7.47448e+07	1.33333	16.2547	310.927
7.47454e+07	1.34028	16.3393	310.903
7.4746e+07	1.34722	16.424	310.879
7.47466e+07	1.35417	16.5086	310.854
7.47472e+07	1.36111	16.5933	310.83
7.47478e+07	1.36806	16.678	310.806
7.47484e+07	1.375	16.7626	310.782
7.4749e+07	1.38194	16.8473	310.757
7.47496e+07	1.38889	16.9319	310.733
7.47502e+07	1.39583	17.0166	310.709
7.47508e+07	1.40278	17.1013	310.684
7.47514e+07	1.40972	17.1859	310.66
7.4752e+07	1.41667	17.2706	310.636
7.47526e+07	1.42361	17.3552	310.611
7.47532e+07	1.43056	17.4399	310.587
7.47538e+07	1.4375	17.5246	310.563
7.47544e+07	1.44444	17.6092	310.538
7.4755e+07	1.45139	17.6939	310.514
7.47556e+07	1.45833	17.7785	310.489
7.47562e+07	1.46528	17.8632	310.465
7.47568e+07	1.47222	17.9478	310.441
7.47574e+07	1.47917	18.0325	310.415
7.4758e+07	1.48611	18.1172	310.379
7.47586e+07	1.49306	18.2018	310.333
7.47592e+07	1.5	18.2865	310.28
7.47598e+07	1.50694	18.3711	310.222
7.47604e+07	1.51389	18.4558	310.161
7.4761e+07	1.52083	18.5405	310.098
7.47616e+07	1.52778	18.6251	310.034
7.47622e+07	1.53472	18.7098	309.968
7.47628e+07	1.54167	18.7944	309.902
7.47634e+07	1.54861	18.8791	309.835
7.4764e+07	1.55556	18.9638	309.767
7.47646e+07	1.5625	19.0484	309.7
7.47652e+07	1.56944	19.1331	309.632
7.47658e+07	1.57639	19.2177	309.564
7.47664e+07	1.58333	19.3024	309.496
7.4767e+07	1.59028	19.3871	309.428
7.47676e+07	1.59722	19.4717	309.36
7.47682e+07	1.60417	19.5564	309.292
7.47688e+07	1.61111	19.641	309.223
7.47694e+07	1.61806	19.7257	309.155
7.477e+07	1.625	19.8104	309.087
7.47706e+07	1.63194	19.895	309.018
7.47712e+07	1.63889	19.9797	308.95
7.47718e+07	1.64583	20.0643	308.881
7.47724e+07	1.65278	20.149	308.813
7.4773e+07	1.65972	20.2337	308.744
7.47736e+07	1.66667	20.3183	308.675
7.47742e+07	1.67361	20.403	308.606
7.47748e+07	1.68056	20.4876	308.538
7.47754e+07	1.6875	20.5723	308.469
7.4776e+07	1.69444	20.657	308.4
7.47766e+07	1.70139	20.7416	308.331
7.47772e+07	1.70833	20.8263	308.262
7.47778e+07	1.71528	20.9109	308.193
7.47784e+07	1.72222	20.9956	308.124
7.4779e+07	1.72917	21.0803	308.055
7.47796e+07	1.73611	21.1649	307.986
7.47802e+07	1.74306	21.2496	307.916
7.47808e+07	1.75	21.3342	307.847
7.47814e+07	1.75694	21.4189	307.778
7.4782e+07	1.76389	21.5036	307.709
7.47826e+07	1.77083	21.5882	307.639
7.47832e+07	1.77778	21.6729	307.57
7.47838e+07	1.78472	21.7575	307.5
7.47844e+07	1.79167	21.8422	307.431
7.4785e+07	1.79861	21.9269	307.361
7.47856e+07	1.80556	22.0115	307.291
7.47862e+07	1.8125	22.0962	307.222
7.47868e+07	1.81944	22.1808	307.152
7.47874e+07	1.82639	22.2655	307.082
7.4788e+07	1.83333	22.3502	307.012
7.47886e+07	1.84028	22.4348	306.943
7.47892e+07	1.84722	22.5195	306.873
7.47898e+07	1.85417	22.6041	306.803
7.47904e+07	1.86111	22.6888	306.733
7.4791e+07	1.86806	22.7735	306.663
7.47916e+07	1.875	22.8581	306.592
7.47922e+07	1.88194	22.9428	306.522
7.47928e+07	1.88889	23.0274	306.452
7.47934e+07	1.89583	23.1121	306.382
7.4794e+07	1.90278	23.1967	306.312
7.47946e+07	1.90972	23.2814	306.241
7.47952e+07	1.91667	23.3661	306.171
7.47958e+07	1.92361	23.4507	306.1
7.47964e+07	1.93056	23.5354	306.03
7.4797e+07	1.9375	23.62	305.959
7.47976e+07	1.94444	23.7047	305.889
7.47982e+07	1.95139	23.7894	305.818
7.47988e+07	1.95833	23.874	305.747
7.47994e+07	1.96528	23.9587	305.677
7.48e+07	1.97222	24.0433	305.606
7.48006e+07	1.97917	24.128	305.535
7.48012e+07	1.98611	24.2127	305.464
7.48018e+07	1.99306	24.2973	305.393
7.48024e+07	2	24.382	305.322
7.4803e+07	2.00694	24.4666	305.251
7.48036e+07	2.01389	24.5513	305.18
7.48042e+07	2.02083	24.636	305.109
7.48048e+07	2.02778	24.7206	305.038
7.48054e+07	2.03472	24.8053	304.966
7.4806e+07	2.04167	24.8899	304.895
7.48066e+07	2.04861	24.9746	304.824
7.48072e+07	2.05556	25.0593	304.752
7.48078e+07	2.0625	25.1439	304.681
7.48084e+07	2.06944	25.2286	304.609
7.4809e+07	2.07639	25.3132	304.538
7.48096e+07	2.08333	25.3979	304.466
7.48102e+07	2.09028	25.4826	304.395
7.48108e+07	2.09722	25.5672	304.323
7.48114e+07	2.10417	25.6519	304.251
7.4812e+07	2.11111	25.7365	304.179
7.48126e+07	2.11806	25.8212	304.108
7.48132e+07	2.125	25.9059	304.036
7.48138e+07	2.13194	25.9905	303.964
7.48144e+07	2.13889	26.0752	303.892
7.4815e+07	2.14583	26.1598	303.82
7.48156e+07	2.15278	26.2445	303.748
7.48162e+07	2.15972	26.3292	303.675
7.48168e+07	2.16667	26.4138	303.603
7.48174e+07	2.17361	26.4985	303.531
7.4818e+07	2.18056	26.5831	303.459
7.48186e+07	2.1875	26.6678	303.386
7.48192e+07	2.19444	26.7525	303.314
7.48198e+07	2.20139	26.8371	303.241
7.48204e+07	2.20833	26.9218	303.169
7.4821e+07	2.21528	27.0064	303.096
7.48216e+07	2.22222	27.0911	303.024
7.48222e+07	2.22917	27.1758	302.951
7.48228e+07	2.23611	27.2604	302.878
7.48234e+07	2.24306	27.3451	302.806
7.4824e+07	2.25	27.4297	302.733
7.48246e+07	2.25694	27.5144	302.66
7.48252e+07	2.26389	27.5991	302.587
7.48258e+07	2.27083	27.6837	302.514
7.48264e+07	2.27778	27.7684	302.441
7.4827e+07	2.28472	27.853	302.368
7.48276e+07	2.29167	27.9377	302.295
7.48282e+07	2.29861	28.0224	302.221
7.48288e+07	2.30556	28.107	302.148
7.48294e+07	2.3125	28.1917	302.075
7.483e+07	2.31944	28.2763	302.002
7.48306e+07	2.32639	28.361	301.928
7.48312e+07	2.33333	28.4456	301.855
7.48318e+07	2.34028	28.5303	301.781
7.48324e+07	2.34722	28.615	301.708
7.4833e+07	2.35417	28.6996	301.634
7.48336e+07	2.36111	28.7843	301.56
7.48342e+07	2.36806	28.8689	301.487
7.48348e+07	2.375	28.9536	301.413
7.48354e+07	2.38194	29.0383	301.339
7.4836e+07	2.38889	29.1229	301.265
7.48366e+07	2.39583	29.2076	301.191
7.48372e+07	2.40278	29.2922	301.117
7.48378e+07	2.40972	29.3769	301.043
7.48384e+07	2.41667	29.4616	300.969
7.4839e+07	2.42361	29.5462	300.895
7.48396e+07	2.43056	29.6309	300.821
7.48402e+07	2.4375	29.7155	300.746
7.48408e+07	2.44444	29.8002	300.672
7.48414e+07	2.45139	29.8849	300.598
7.4842e+07	2.45833	29.9695	300.523
7.48426e+07	2.46528	30.0542	300.449
7.48432e+07	2.47222	30.1388	300.374
7.48438e+07	2.47917	30.2235	300.299
7.48444e+07	2.48611	30.3082	300.225
7.4845e+07	2.49306	30.3928	300.15
7.48456e+07	2.5	30.4775	300.075
7.48462e+07	2.50694	30.5621	300
7.48468e+07	2.51389	30.6468	299.926
7.48474e+07	2.52083	30.7315	299.851
7.4848e+07	2.52778	30.8161	299.776
7.48486e+07	2.53472	30.9008	299.701
7.48492e+07	2.54167	30.9854	299.625
7.48498e+07	2.54861	31.0701	299.55
7.48504e+07	2.55556	31.1548	299.475
7.4851e+07	2.5625	31.2394	299.4
7.48516e+07	2.56944	31.3241	299.324
7.48522e+07	2.57639	31.4087	299.249
7.48528e+07	2.58333	31.4934	299.174
7.48534e+07	2.59028	31.5781	299.098
7.4854e+07	2.59722	31.6627	299.022
7.48546e+07	2.60417	31.7474	298.947
7.48552e+07	2.61111	31.832	298.871
7.48558e+07	2.61806	31.9167	298.795
7.48564e+07	2.625	32.0014	298.72
7.4857e+07	2.63194	32.086	298.644
7.48576e+07	2.63889	32.1707	298.568
7.48582e+07	2.64583	32.2553	298.492
7.48588e+07	2.65278	32.34	298.416
7.48594e+07	2.65972	32.4247	298.34
7.486e+07	2.66667	32.5093	298.264
7.48606e+07	2.67361	32.594	298.187
7.48612e+07	2.68056	32.6786	298.111
7.48618e+07	2.6875	32.7633	298.035
7.48624e+07	2.69444	32.848	297.959
7.4863e+07	2.70139	32.9326	297.882
7.48636e+07	2.70833	33.0173	297.806
7.48642e+07	2.71528	33.1019	297.729
7.48648e+07	2.72222	33.1866	297.652
7.48654e+07	2.72917	33.2712	297.576
7.4866e+07	2.73611	33.3559	297.499
7.48666e+07	2.74306	33.4406	297.422
7.48672e+07	2.75	33.5252	297.345
7.48678e+07	2.75694	33.6099	297.268
7.48684e+07	2.76389	33.6945	297.192
7.4869e+07	2.77083	33.7792	297.114
7.48696e+07	2.77778	33.8639	297.037
7.48702e+07	2.78472	33.9485	296.96
7.48708e+07	2.79167	34.0332	296.883
7.48714e+07	2.79861	34.1178	296.806
7.4872e+07	2.80556	34.2025	296.728
7.48726e+07	2.8125	34.2872	296.651
7.48732e+07	2.81944	34.3718	296.574
7.48738e+07	2.82639	34.4565	296.496
7.48744e+07	2.83333	34.5411	296.419
7.4875e+07	2.84028	34.6258	296.341
7.48756e+07	2.84722	34.7105	296.263
7.48762e+07	2.85417	34.7951	296.185
7.48768e+07	2.86111	34.8798	296.108
7.48774e+07	2.86806	34.9644	296.03
7.4878e+07	2.875	35.0491	295.952
7.48786e+07	2.88194	35.1338	295.874
7.48792e+07	2.88889	35.2184	295.796
7.48798e+07	2.89583	35.3031	295.718
7.48804e+07	2.90278	35.3877	295.64
7.4881e+07	2.90972	35.4724	295.561
7.48816e+07	2.91667	35.5571	295.483
7.48822e+07	2.92361	35.6417	295.405
7.48828e+07	2.93056	35.7264	295.326
7.48834e+07	2.9375	35.811	295.248
7.4884e+07	2.94444	35.8957	295.169
7.48846e+07	2.95139	35.9804	295.091
7.48852e+07	2.95833	36.065	295.009
7.48858e+07	2.96528	36.1497	294.918
7.48864e+07	2.97222	36.2343	294.821
7.4887e+07	2.97917	36.319	294.718
7.48876e+07	2.98611	36.4037	294.612
7.48882e+07	2.99306	36.4883	294.503
7.48888e+07	3	36.573	294.392
7.48894e+07	3.00694	36.6576	294.28
7.489e+07	3.01389	36.7423	294.166
7.48906e+07	3.02083	36.827	294.052
7.48912e+07	3.02778	36.9116	293.937
7.48918e+07	3.03472	36.9963	293.822
7.48924e+07	3.04167	37.0809	293.706
7.4893e+07	3.04861	37.1656	293.59
7.48936e+07	3.05556	37.2503	293.474
7.48942e+07	3.0625	37.3349	293.357
7.48948e+07	3.06944	37.4196	293.241
7.48954e+07	3.07639	37.5042	293.124
7.4896e+07	3.08333	37.5889	293.007
7.48966e+07	3.09028	37.6736	292.889
7.48972e+07	3.09722	37.7582	292.772
7.48978e+07	3.10417	37.8429	292.654
7.48984e+07	3.11111	37.9275	292.537
7.4899e+07	3.11806	38.0122	292.419
7.48996e+07	3.125	38.0969	292.301
7.49002e+07	3.13194	38.1815	292.182
7.49008e+07	3.13889	38.2662	292.064
7.49014e+07	3.14583	38.3508	291.946
7.4902e+07	3.15278	38.4355	291.827
7.49026e+07	3.15972	38.5201	291.708
7.49032e+07	3.16667	38.6048	291.589
7.49038e+07	3.17361	38.6895	291.47
7.49044e+07	3.18056	38.7741	291.351
7.4905e+07	3.1875	38.8588	291.232
7.49056e+07	3.19444	38.9434	291.112
7.49062e+07	3.20139	39.0281	290.993
7.49068e+07	3.20833	39.1128	290.873
7.49074e+07	3.21528	39.1974	290.753
7.4908e+07	3.22222	39.2821	290.633
7.49086e+07	3.22917	39.3667	290.513
7.49092e+07	3.23611	39.4514	290.393
7.49098e+07	3.24306	39.5361	290.272
7.49104e+07	3.25	39.6207	290.151
7.4911e+07	3.25694	39.7054	290.031
7.49116e+07	3.26389	39.79	289.91
7.49122e+07	3.27083	39.8747	289.789
7.49128e+07	3.27778	39.9594	289.667
7.49134e+07	3.28472	40.044	289.546
7.4914e+07	3.29167	40.1287	289.424
7.49146e+07	3.29861	40.2133	289.303
7.49152e+07	3.30556	40.298	289.181
7.49158e+07	3.3125	40.3827	289.059
7.49164e+07	3.31944	40.4673	288.937
7.4917e+07	3.32639	40.552	288.814
7.49176e+07	3.33333	40.6366	288.692
7.49182e+07	3.34028	40.7213	288.569
7.49188e+07	3.34722	40.806	288.447
7.49194e+07	3.35417	40.8906	288.324
7.492e+07	3.36111	40.9753	288.2
7.49206e+07	3.36806	41.0599	288.077
7.49212e+07	3.375	41.1446	287.954
7.49218e+07	3.38194	41.2293	287.83
7.49224e+07	3.38889	41.3139	287.707
7.4923e+07	3.39583	41.3986	287.583
7.49236e+07	3.40278	41.4832	287.459
7.49242e+07	3.40972	41.5679	287.334
7.49248e+07	3.41667	41.6526	287.21
7.49254e+07	3.42361	41.7372	287.086
7.4926e+07	3.43056	41.8219	286.961
7.49266e+07	3.4375	41.9065	286.836
7.49272e+07	3.44444	41.9912	286.711
7.49278e+07	3.45139	42.0759	286.586
7.49284e+07	3.45833	42.1605	286.461
7.4929e+07	3.46528	42.2452	286.335
7.49296e+07	3.47222	42.3298	286.209
7.49302e+07	3.47917	42.4145	286.084
7.49308e+07	3.48611	42.4992	285.958
7.49314e+07	3.49306	42.5838	285.832
7.4932e+07	3.5	42.6685	285.705
7.49326e+07	3.50694	42.7531	285.579
7.49332e+07	3.51389	42.8378	285.452
7.49338e+07	3.52083	42.9225	285.325
7.49344e+07	3.52778	43.0071	285.198
7.4935e+07	3.53472	43.0918	285.071
7.49356e+07	3.54167	43.1764	284.944
7.49362e+07	3.54861	43.2611	284.816
7.49368e+07	3.55556	43.3458	284.689
7.49374e+07	3.5625	43.4304	284.561
7.4938e+07	3.56944	43.5151	284.433
7.49386e+07	3.57639	43.5997	284.305
7.49392e+07	3.58333	43.6844	284.177
7.49398e+07	3.59028	43.769	284.048
7.49404e+07	3.59722	43.8537	283.919
7.4941e+07	3.60417	43.9384	283.791
7.49416e+07	3.61111	44.023	283.662
7.49422e+07	3.61806	44.1077	283.532
7.49428e+07	3.625	44.1923	283.403
7.49434e+07	3.63194	44.277	283.273
7.4944e+07	3.63889	44.3617	283.144
7.49446e+07	3.64583	44.4463	283.014
7.49452e+07	3.65278	44.531	282.884
7.49458e+07	3.65972	44.6156	282.754
7.49464e+07	3.66667	44.7003	282.623
7.4947e+07	3.67361	44.785	282.493
7.49476e+07	3.68056	44.8696	282.362
7.49482e+07	3.6875	44.9543	282.231
7.49488e+07	3.69444	45.0389	282.1
7.49494e+07	3.70139	45.1236	281.968
7.495e+07	3.70833	45.2083	281.837
7.49506e+07	3.71528	45.2929	281.705
7.49512e+07	3.72222	45.3776	281.573
7.49518e+07	3.72917	45.4622	281.441
7.49524e+07	3.73611	45.5469	281.309
7.4953e+07	3.74306	45.6316	281.177
7.49536e+07	3.75	45.7162	281.044
7.49542e+07	3.75694	45.8009	280.911
7.49548e+07	3.76389	45.8855	280.778
7.49554e+07	3.77083	45.9702	280.645
7.4956e+07	3.77778	46.0549	280.512
7.49566e+07	3.78472	46.1395	280.379
7.49572e+07	3.79167	46.2242	280.245
7.49578e+07	3.79861	46.3088	280.111
7.49584e+07	3.80556	46.3935	279.977
7.4959e+07	3.8125	46.4782	279.843
7.49596e+07	3.81944	46.5628	279.708
7.49602e+07	3.82639	46.6475	279.573
7.49608e+07	3.83333	46.7321	279.439
7.49614e+07	3.84028	46.8168	279.304
7.4962e+07	3.84722	46.9015	279.168
7.49626e+07	3.85417	46.9861	279.033
7.49632e+07	3.86111	47.0708	278.897
7.49638e+07	3.86806	47.1554	278.762
7.49644e+07	3.875	47.2401	278.625
7.4965e+07	3.88194	47.3248	278.489
7.49656e+07	3.88889	47.4094	278.353
7.49662e+07	3.89583	47.4941	278.216
7.49668e+07	3.90278	47.5787	278.08
7.49674e+07	3.90972	47.6634	277.943
7.4968e+07	3.91667	47.7481	277.805
7.49686e+07	3.92361	47.8327	277.668
7.49692e+07	3.93056	47.9174	277.53
7.49698e+07	3.9375	48.002	277.393
7.49704e+07	3.94444	48.0867	277.255
7.4971e+07	3.95139	48.1714	277.116
7.49716e+07	3.95833	48.256	276.978
7.49722e+07	3.96528	48.3407	276.839
7.49728e+07	3.97222	48.4253	276.701
7.49734e+07	3.97917	48.51	276.562
7.4974e+07	3.98611	48.5946	276.422
7.49746e+07	3.99306	48.6793	276.283
7.49752e+07	4	48.764	276.143
7.49758e+07	4.00694	48.8486	276.003
7.49764e+07	4.01389	48.9333	275.863
7.4977e+07	4.02083	49.0179	275.723
7.49776e+07	4.02778	49.1026	275.583
7.49782e+07	4.03472	49.1873	275.442
7.49788e+07	4.04167	49.2719	275.301
7.49794e+07	4.04861	49.3566	275.16
7.498e+07	4.05556	49.4412	275.019
7.49806e+07	4.0625	49.5259	274.877
7.49812e+07	4.06944	49.6106	274.735
7.49818e+07	4.07639	49.6952	274.593
7.49824e+07	4.08333	49.7799	274.451
7.4983e+07	4.09028	49.8645	274.309
7.49836e+07	4.09722	49.9492	274.166
7.49842e+07	4.10417	50.0339	274.023
7.49848e+07	4.11111	50.1185	273.88
7.49854e+07	4.11806	50.2032	273.737
7.4986e+07	4.125	50.2878	273.594
7.49866e+07	4.13194	50.3725	273.45
7.49872e+07	4.13889	50.4572	273.306
7.49878e+07	4.14583	50.5418	273.162
7.49884e+07	4.15278	50.6265	273.017
7.4989e+07	4.15972	50.7111	272.873
7.49896e+07	4.16667	50.7958	272.728
7.49902e+07	4.17361	50.8805	272.583
7.49908e+07	4.18056	50.9651	272.438
7.49914e+07	4.1875	51.0498	272.292
7.4992e+07	4.19444	51.1344	272.146
7.49926e+07	4.20139	51.2191	272
7.49932e+07	4.20833	51.3038	271.854
7.49938e+07	4.21528	51.3884	271.708
7.49944e+07	4.22222	51.4731	271.561
7.4995e+07	4.22917	51.5577	271.414
7.49956e+07	4.23611	51.6424	271.267
7.49962e+07	4.24306	51.7271	271.12
7.49968e+07	4.25	51.8117	270.972
7.49974e+07	4.25694	51.8964	270.824
7.4998e+07	4.26389	51.981	270.676
7.49986e+07	4.27083	52.0657	270.528
7.49992e+07	4.27778	52.1504	270.379
7.49998e+07	4.28472	52.235	270.23
7.50004e+07	4.29167	52.3197	270.081
7.5001e+07	4.29861	52.4043	269.932
7.50016e+07	4.30556	52.489	269.782
7.50022e+07	4.3125	52.5737	269.633
7.50028e+07	4.31944	52.6583	269.483
7.50034e+07	4.32639	52.743	269.332
7.5004e+07	4.33333	52.8276	269.182
7.50046e+07	4.34028	52.9123	269.031
7.50052e+07	4.34722	52.997	268.88
7.50058e+07	4.35417	53.0816	268.729
7.50064e+07	4.36111	53.1663	268.577
7.5007e+07	4.36806	53.2509	268.426
7.50076e+07	4.375	53.3356	268.274
7.50082e+07	4.38194	53.4203	268.121
7.50088e+07	4.38889	53.5049	267.969
7.50094e+07	4.39583	53.5896	267.816
7.501e+07	4.40278	53.6742	267.663
7.50106e+07	4.40972	53.7589	267.51
7.50112e+07	4.41667	53.8435	267.356
7.50118e+07	4.42361	53.9282	267.202
7.50124e+07	4.43056	54.0129	267.048
7.5013e+07	4.4375	54.0975	266.892
7.50136e+07	4.44444	54.1822	266.732
7.50142e+07	4.45139	54.2668	266.57
7.50148e+07	4.45833	54.3515	266.406
7.50154e+07	4.46528	54.4362	266.24
7.5016e+07	4.47222	54.5208	266.072
7.50166e+07	4.47917	54.6055	265.904
7.50172e+07	4.48611	54.6901	265.734
7.50178e+07	4.49306	54.7748	265.564
7.50184e+07	4.5	54.8595	265.392
7.5019e+07	4.50694	54.9441	265.221
7.50196e+07	4.51389	55.0288	265.048
7.50202e+07	4.52083	55.1134	264.875
7.50208e+07	4.52778	55.1981	264.702
7.50214e+07	4.53472	55.2828	264.528
7.5022e+07	4.54167	55.3674	264.354
7.50226e+07	4.54861	55.4521	264.179
7.50232e+07	4.55556	55.5367	264.004
7.50238e+07	4.5625	55.6214	263.829
7.50244e+07	4.56944	55.7061	263.653
7.5025e+07	4.57639	55.7907	263.477
7.50256e+07	4.58333	55.8754	263.3
7.50262e+07	4.59028	55.96	263.123
7.50268e+07	4.59722	56.0447	262.946
7.50274e+07	4.60417	56.1294	262.768
7.5028e+07	4.61111	56.214	262.59
7.50286e+07	4.61806	56.2987	262.412
7.50292e+07	4.625	56.3833	262.233
7.50298e+07	4.63194	56.468	262.054
7.50304e+07	4.63889	56.5527	261.874
7.5031e+07	4.64583	56.6373	261.695
7.50316e+07	4.65278	56.722	261.514
7.50322e+07	4.65972	56.8066	261.334
7.50328e+07	4.66667	56.8913	261.153
7.50334e+07	4.67361	56.976	260.972
7.5034e+07	4.68056	57.0606	260.79
7.50346e+07	4.6875	57.1453	260.608
7.50352e+07	4.69444	57.2299	260.426
7.50358e+07	4.70139	57.3146	260.243
7.50364e+07	4.70833	57.3993	260.06
7.5037e+07	4.71528	57.4839	259.876
7.50376e+07	4.72222	57.5686	259.692
7.50382e+07	4.72917	57.6532	259.508
7.50388e+07	4.73611	57.7379	259.323
7.50394e+07	4.74306	57.8226	259.138
7.504e+07	4.75	57.9072	258.953
7.50406e+07	4.75694	57.9919	258.767
7.50412e+07	4.76389	58.0765	258.581
7.50418e+07	4.77083	58.1612	258.394
7.50424e+07	4.77778	58.2459	258.207
7.5043e+07	4.78472	58.3305	258.02
7.50436e+07	4.79167	58.4152	257.832
7.50442e+07	4.79861	58.4998	257.644
7.50448e+07	4.80556	58.5845	257.455
7.50454e+07	4.8125	58.6692	257.266
7.5046e+07	4.81944	58.7538	257.077
7.50466e+07	4.82639	58.8385	256.887
7.50472e+07	4.83333	58.9231	256.697
7.50478e+07	4.84028	59.0078	256.506
7.50484e+07	4.84722	59.0924	256.315
7.5049e+07	4.85417	59.1771	256.124
7.50496e+07	4.86111	59.2618	255.932
7.50502e+07	4.86806	59.3464	255.74
7.50508e+07	4.875	59.4311	255.547
7.50514e+07	4.88194	59.5157	255.354
7.5052e+07	4.88889	59.6004	255.16
7.50526e+07	4.89583	59.6851	254.966
7.50532e+07	4.90278	59.7697	254.772
7.50538e+07	4.90972	59.8544	254.577
7.50544e+07	4.91667	59.939	254.382
7.5055e+07	4.92361	60.0237	254.186
7.50556e+07	4.93056	60.1084	253.99
7.50562e+07	4.9375	60.193	253.793
7.50568e+07	4.94444	60.2777	253.596
7.50574e+07	4.95139	60.3623	253.399
7.5058e+07	4.95833	60.447	253.201
7.50586e+07	4.96528	60.5317	253.003
7.50592e+07	4.97222	60.6163	252.804
7.50598e+07	4.97917	60.701	252.605
7.50604e+07	4.98611	60.7856	252.405
7.5061e+07	4.99306	60.8703	252.205
7.50616e+07	5	60.955	252.004
7.50622e+07	5.00694	61.0396	251.803
7.50628e+07	5.01389	61.1243	251.601
7.50634e+07	5.02083	61.2089	251.399
7.5064e+07	5.02778	61.2936	251.197
7.50646e+07	5.03472	61.3783	250.994
7.50652e+07	5.04167	61.4629	250.79
7.50658e+07	5.04861	61.5476	250.586
7.50664e+07	5.05556	61.6322	250.382
7.5067e+07	5.0625	61.7169	250.177
7.50676e+07	5.06944	61.8016	249.972
7.50682e+07	5.07639	61.8862	249.766
7.50688e+07	5.08333	61.9709	249.559
7.50694e+07	5.09028	62.0555	249.352
7.507e+07	5.09722	62.1402	249.145
7.50706e+07	5.10417	62.2249	248.937
7.50712e+07	5.11111	62.3095	248.729
7.50718e+07	5.11806	62.3942	248.52
7.50724e+07	5.125	62.4788	248.311
7.5073e+07	5.13194	62.5635	248.101
7.50736e+07	5.13889	62.6482	247.89
7.50742e+07	5.14583	62.7328	247.679
7.50748e+07	5.15278	62.8175	247.468
7.50754e+07	5.15972	62.9021	247.256
7.5076e+07	5.16667	62.9868	247.043
7.50766e+07	5.17361	63.0715	246.83
7.50772e+07	5.18056	63.1561	246.617
7.50778e+07	5.1875	63.2408	246.403
7.50784e+07	5.19444	63.3254	246.188
7.5079e+07	5.20139	63.4101	245.973
7.50796e+07	5.20833	63.4948	245.757
7.50802e+07	5.21528	63.5794	245.541
7.50808e+07	5.22222	63.6641	245.324
7.50814e+07	5.22917	63.7487	245.107
7.5082e+07	5.23611	63.8334	244.889
7.50826e+07	5.24306	63.918	244.67
7.50832e+07	5.25	64.0027	244.451
7.50838e+07	5.25694	64.0874	244.232
7.50844e+07	5.26389	64.172	244.012
7.5085e+07	5.27083	64.2567	243.791
7.50856e+07	5.27778	64.3413	243.569
7.50862e+07	5.28472	64.426	243.348
7.50868e+07	5.29167	64.5107	243.125
7.50874e+07	5.29861	64.5953	242.902
7.5088e+07	5.30556	64.68	242.678
7.50886e+07	5.3125	64.7646	242.454
7.50892e+07	5.31944	64.8493	242.229
7.50898e+07	5.32639	64.934	242.004
7.50904e+07	5.33333	65.0186	241.778
7.5091e+07	5.34028	65.1033	241.551
7.50916e+07	5.34722	65.1879	241.324
7.50922e+07	5.35417	65.2726	241.096
7.50928e+07	5.36111	65.3573	240.867
7.50934e+07	5.36806	65.4419	240.638
7.5094e+07	5.375	65.5266	240.408
7.50946e+07	5.38194	65.6112	240.178
7.50952e+07	5.38889	65.6959	239.947
7.50958e+07	5.39583	65.7806	239.715
7.50964e+07	5.40278	65.8652	239.483
7.5097e+07	5.40972	65.9499	239.25
7.50976e+07	5.41667	66.0345	239.016
7.50982e+07	5.42361	66.1192	238.782
7.50988e+07	5.43056	66.2039	238.547
7.50994e+07	5.4375	66.2885	238.312
7.51e+07	5.44444	66.3732	238.075
7.51006e+07	5.45139	66.4578	237.839
7.51012e+07	5.45833	66.5425	237.601
7.51018e+07	5.46528	66.6272	237.363
7.51024e+07	5.47222	66.7118	237.124
7.5103e+07	5.47917	66.7965	236.884
7.51036e+07	5.48611	66.8811	236.644
7.51042e+07	5.49306	66.9658	236.403
7.51048e+07	5.5	67.0505	236.161
7.51054e+07	5.50694	67.1351	235.919
7.5106e+07	5.51389	67.2198	235.675
7.51066e+07	5.52083	67.3044	235.431
7.51072e+07	5.52778	67.3891	235.187
7.51078e+07	5.53472	67.4738	234.942
7.51084e+07	5.54167	67.5584	234.695
7.5109e+07	5.54861	67.6431	234.449
7.51096e+07	5.55556	67.7277	234.201
7.51102e+07	5.5625	67.8124	233.953
7.51108e+07	5.56944	67.8971	233.704
7.51114e+07	5.57639	67.9817	233.454
7.5112e+07	5.58333	68.0664	233.203
7.51126e+07	5.59028	68.151	232.952
7.51132e+07	5.59722	68.2357	232.7
7.51138e+07	5.60417	68.3204	232.447
7.51144e+07	5.61111	68.405	232.194
7.5115e+07	5.61806	68.4897	231.939
7.51156e+07	5.625	68.5743	231.684
7.51162e+07	5.63194	68.659	231.428
7.51168e+07	5.63889	68.7437	231.171
7.51174e+07	5.64583	68.8283	230.913
7.5118e+07	5.65278	68.913	230.655
7.51186e+07	5.65972	68.9976	230.396
7.51192e+07	5.66667	69.0823	230.135
7.51198e+07	5.67361	69.1669	229.875
7.51204e+07	5.68056	69.2516	229.613
7.5121e+07	5.6875	69.3363	229.35
7.51216e+07	5.69444	69.4209	229.087
7.51222e+07	5.70139	69.5056	228.822
7.51228e+07	5.70833	69.5902	228.557
7.51234e+07	5.71528	69.6749	228.291
7.5124e+07	5.72222	69.7596	228.024
7.51246e+07	5.72917	69.8442	227.756
7.51252e+07	5.73611	69.9289	227.487
7.51258e+07	5.74306	70.0135	227.218
7.51264e+07	5.75	70.0982	226.947
7.5127e+07	5.75694	70.1829	226.676
7.51276e+07	5.76389	70.2675	226.403
7.51282e+07	5.77083	70.3522	226.13
7.51288e+07	5.77778	70.4368	225.856
7.51294e+07	5.78472	70.5215	225.581
7.513e+07	5.79167	70.6062	225.305
7.51306e+07	5.79861	70.6908	225.028
7.51312e+07	5.80556	70.7755	224.75
7.51318e+07	5.8125	70.8601	224.471
7.51324e+07	5.81944	70.9448	224.191
7.5133e+07	5.82639	71.0295	223.91
7.51336e+07	5.83333	71.1141	223.628
7.51342e+07	5.84028	71.1988	223.345
7.51348e+07	5.84722	71.2834	223.061
7.51354e+07	5.85417	71.3681	222.776
7.5136e+07	5.86111	71.4528	222.49
7.51366e+07	5.86806	71.5374	222.203
7.51372e+07	5.875	71.6221	221.915
7.51378e+07	5.88194	71.7067	221.626
7.51384e+07	5.88889	71.7914	221.336
7.5139e+07	5.89583	71.8761	221.044
7.51396e+07	5.90278	71.9607	220.752
7.51402e+07	5.90972	72.0454	220.46
7.51408e+07	5.91667	72.13	220.173
7.51414e+07	5.92361	72.2147	219.891
7.5142e+07	5.93056	72.2994	219.614
7.51426e+07	5.9375	72.384	219.342
7.51432e+07	5.94444	72.4687	219.072
7.51438e+07	5.95139	72.5533	218.805
7.51444e+07	5.95833	72.638	218.541
7.5145e+07	5.96528	72.7227	218.278
7.51456e+07	5.97222	72.8073	218.017
7.51462e+07	5.97917	72.892	217.757
7.51468e+07	5.98611	72.9766	217.499
7.51474e+07	5.99306	73.0613	217.24
7.5148e+07	6	73.146	216.983
7.51486e+07	6.00694	73.2306	216.726
7.51492e+07	6.01389	73.3153	216.468
7.51498e+07	6.02083	73.3999	216.211
7.51504e+07	6.02778	73.4846	215.954
7.5151e+07	6.03472	73.5693	215.697
7.51516e+07	6.04167	73.6539	215.44
7.51522e+07	6.04861	73.7386	215.182
7.51528e+07	6.05556	73.8232	214.923
7.51534e+07	6.0625	73.9079	214.665
7.5154e+07	6.06944	73.9925	214.406
7.51546e+07	6.07639	74.0772	214.146
7.51552e+07	6.08333	74.1619	213.885
7.51558e+07	6.09028	74.2465	213.624
7.51564e+07	6.09722	74.3312	213.363
7.5157e+07	6.10417	74.4158	213.1
7.51576e+07	6.11111	74.5005	212.837
7.51582e+07	6.11806	74.5852	212.573
7.51588e+07	6.125	74.6698	212.308
7.51594e+07	6.13194	74.7545	212.043
7.516e+07	6.13889	74.8391	211.776
7.51606e+07	6.14583	74.9238	211.509
7.51612e+07	6.15278	75.0085	211.241
7.51618e+07	6.15972	75.0931	210.972
7.51624e+07	6.16667	75.1778	210.702
7.5163e+07	6.17361	75.2624	210.431
7.51636e+07	6.18056	75.3471	210.16
7.51642e+07	6.1875	75.4318	209.887
7.51648e+07	6.19444	75.5164	209.613
7.51654e+07	6.20139	75.6011	209.339
7.5166e+07	6.20833	75.6857	209.063
7.51666e+07	6.21528	75.7704	208.787
7.51672e+07	6.22222	75.8551	208.509
7.51678e+07	6.22917	75.9397	208.231
7.51684e+07	6.23611	76.0244	207.951
7.5169e+07	6.24306	76.109	207.671
7.51696e+07	6.25	76.1937	207.389
7.51702e+07	6.25694	76.2784	207.107
7.51708e+07	6.26389	76.363	206.823
7.51714e+07	6.27083	76.4477	206.538
7.5172e+07	6.27778	76.5323	206.253
7.51726e+07	6.28472	76.617	205.966
7.51732e+07	6.29167	76.7017	205.678
7.51738e+07	6.29861	76.7863	205.389
7.51744e+07	6.30556	76.871	205.099
7.5175e+07	6.3125	76.9556	204.807
7.51756e+07	6.31944	77.0403	204.515
7.51762e+07	6.32639	77.125	204.221
7.51768e+07	6.33333	77.2096	203.927
7.51774e+07	6.34028	77.2943	203.631
7.5178e+07	6.34722	77.3789	203.334
7.51786e+07	6.35417	77.4636	203.035
7.51792e+07	6.36111	77.5483	202.736
7.51798e+07	6.36806	77.6329	202.435
7.51804e+07	6.375	77.7176	202.134
7.5181e+07	6.38194	77.8022	201.831
7.51816e+07	6.38889	77.8869	201.526
7.51822e+07	6.39583	77.9716	201.221
7.51828e+07	6.40278	78.0562	200.914
7.51834e+07	6.40972	78.1409	200.606
7.5184e+07	6.41667	78.2255	200.296
7.51846e+07	6.42361	78.3102	199.986
7.51852e+07	6.43056	78.3949	199.674
7.51858e+07	6.4375	78.4795	199.361
7.51864e+07	6.44444	78.5642	199.046
7.5187e+07	6.45139	78.6488	198.73
7.51876e+07	6.45833	78.7335	198.413
7.51882e+07	6.46528	78.8182	198.094
7.51888e+07	6.47222	78.9028	197.774
7.51894e+07	6.47917	78.9875	197.453
7.519e+07	6.48611	79.0721	197.13
7.51906e+07	6.49306	79.1568	196.805
7.51912e+07	6.5	79.2414	196.48
7.51918e+07	6.50694	79.3261	196.153
7.51924e+07	6.51389	79.4108	195.824
7.5193e+07	6.52083	79.4954	195.494
7.51936e+07	6.52778	79.5801	195.162
7.51942e+07	6.53472	79.6647	194.829
7.51948e+07	6.54167	79.7494	194.495
7.51954e+07	6.54861	79.8341	194.159
7.5196e+07	6.55556	79.9187	193.821
7.51966e+07	6.5625	80.0034	193.482
7.51972e+07	6.56944	80.088	193.141
7.51978e+07	6.57639	80.1727	192.798
7.51984e+07	6.58333	80.2574	192.454
7.5199e+07	6.59028	80.342	192.109
7.51996e+07	6.59722	80.4267	191.761
7.52002e+07	6.60417	80.5113	191.413
7.52008e+07	6.61111	80.596	191.062
7.52014e+07	6.61806	80.6807	190.71
7.5202e+07	6.625	80.7653	190.356
7.52026e+07	6.63194	80.85	190
7.52032e+07	6.63889	80.9346	189.642
7.52038e+07	6.64583	81.0193	189.283
7.52044e+07	6.65278	81.104	188.922
7.5205e+07	6.65972	81.1886	188.559
7.52056e+07	6.66667	81.2733	188.194
7.52062e+07	6.67361	81.3579	187.828
7.52068e+07	6.68056	81.4426	187.459
7.52074e+07	6.6875	81.5273	187.089
7.5208e+07	6.69444	81.6119	186.717
7.52086e+07	6.70139	81.6966	186.343
7.52092e+07	6.70833	81.7812	185.967
7.52098e+07	6.71528	81.8659	185.589
7.52104e+07	6.72222	81.9506	185.209
7.5211e+07	6.72917	82.0352	184.827
7.52116e+07	6.73611	82.1199	184.442
7.52122e+07	6.74306	82.2045	184.056
7.52128e+07	6.75	82.2892	183.668
7.52134e+07	6.75694	82.3739	183.278
7.5214e+07	6.76389	82.4585	182.885
7.52146e+07	6.77083	82.5432	182.491
7.52152e+07	6.77778	82.6278	182.094
7.52158e+07	6.78472	82.7125	181.695
7.52164e+07	6.79167	82.7972	181.293
7.5217e+07	6.79861	82.8818	180.89
7.52176e+07	6.80556	82.9665	180.484
7.52182e+07	6.8125	83.0511	180.076
7.52188e+07	6.81944	83.1358	179.666
7.52194e+07	6.82639	83.2205	179.253
7.522e+07	6.83333	83.3051	178.837
7.52206e+07	6.84028	83.3898	178.42
7.52212e+07	6.84722	83.4744	178
7.52218e+07	6.85417	83.5591	177.577
7.52224e+07	6.86111	83.6438	177.152
7.5223e+07	6.86806	83.7284	176.724
7.52236e+07	6.875	83.8131	176.294
7.52242e+07	6.88194	83.8977	175.861
7.52248e+07	6.88889	83.9824	175.426
7.52254e+07	6.89583	84.0671	174.988
7.5226e+07	6.90278	84.1517	174.547
7.52266e+07	6.90972	84.2364	174.103
7.52272e+07	6.91667	84.321	173.657
7.52278e+07	6.92361	84.4057	173.208
7.52284e+07	6.93056	84.4903	172.756
7.5229e+07	6.9375	84.575	172.301
7.52296e+07	6.94444	84.6597	171.843
7.52302e+07	6.95139	84.7443	171.382
7.52308e+07	6.95833	84.829	170.918
7.52314e+07	6.96528	84.9136	170.451
7.5232e+07	6.97222	84.9983	169.981
7.52326e+07	6.97917	85.083	169.508
7.52332e+07	6.98611	85.1676	169.032
7.52338e+07	6.99306	85.2523	168.552
7.52344e+07	7	85.3369	168.07
7.5235e+07	7.00694	85.4216	167.583
7.52356e+07	7.01389	85.5063	167.094
7.52362e+07	7.02083	85.5909	166.601
7.52368e+07	7.02778	85.6756	166.105
7.52374e+07	7.03472	85.7602	165.605
7.5238e+07	7.04167	85.8449	165.102
7.52386e+07	7.04861	85.9296	164.595
7.52392e+07	7.05556	86.0142	164.084
7.52398e+07	7.0625	86.0989	163.57
7.52404e+07	7.06944	86.1835	163.052
7.5241e+07	7.07639	86.2682	162.53
7.52416e+07	7.08333	86.3529	162.005
7.52422e+07	7.09028	86.4375	161.475
7.52428e+07	7.09722	86.5222	160.941
7.52434e+07	7.10417	86.6068	160.404
7.5244e+07	7.11111	86.6915	159.862
7.52446e+07	7.11806	86.7762	159.316
7.52452e+07	7.125	86.8608	158.766
7.52458e+07	7.13194	86.9455	158.212
7.52464e+07	7.13889	87.0301	157.653
7.5247e+07	7.14583	87.1148	157.09
7.52476e+07	7.15278	87.1995	156.522
7.52482e+07	7.15972	87.2841	155.95
7.52488e+07	7.16667	87.3688	155.374
7.52494e+07	7.17361	87.4534	154.792
7.525e+07	7.18056	87.5381	154.206
7.52506e+07	7.1875	87.6228	153.615
7.52512e+07	7.19444	87.7074	153.019
7.52518e+07	7.20139	87.7921	152.418
7.52524e+07	7.20833	87.8767	151.812
7.5253e+07	7.21528	87.9614	151.201
7.52536e+07	7.22222	88.0461	150.584
7.52542e+07	7.22917	88.1307	149.963
7.52548e+07	7.23611	88.2154	149.336
7.52554e+07	7.24306	88.3	148.703
7.5256e+07	7.25	88.3847	148.065
7.52566e+07	7.25694	88.4694	147.421
7.52572e+07	7.26389	88.554	146.771
7.52578e+07	7.27083	88.6387	146.115
7.52584e+07	7.27778	88.7233	145.454
7.5259e+07	7.28472	88.808	144.786
7.52596e+07	7.29167	88.8927	144.112
7.52602e+07	7.29861	88.9773	143.432
7.52608e+07	7.30556	89.062	142.745
7.52614e+07	7.3125	89.1466	142.052
7.5262e+07	7.31944	89.2313	141.352
7.52626e+07	7.32639	89.3159	140.645
7.52632e+07	7.33333	89.4006	139.932
7.52638e+07	7.34028	89.4853	139.211
7.52644e+07	7.34722	89.5699	138.483
7.5265e+07	7.35417	89.6546	137.749
7.52656e+07	7.36111	89.7392	137.006
7.52662e+07	7.36806	89.8239	136.257
7.52668e+07	7.375	89.9086	135.499
7.52674e+07	7.38194	89.9932	134.734
7.5268e+07	7.38889	90.0779	133.973
7.52686e+07	7.39583	90.1625	133.237
7.52692e+07	7.40278	90.2472	132.524
7.52698e+07	7.40972	90.3319	131.834
7.52704e+07	7.41667	90.4165	131.164
7.5271e+07	7.42361	90.5012	130.515
7.52716e+07	7.43056	90.5858	129.886
7.52722e+07	7.4375	90.6705	129.275
7.52728e+07	7.44444	90.7552	128.681
7.52734e+07	7.45139	90.8398	128.105
7.5274e+07	7.45833	90.9245	127.546
7.52746e+07	7.46528	91.0091	127.002
7.52752e+07	7.47222	91.0938	126.473
7.52758e+07	7.47917	91.1785	125.958
7.52764e+07	7.48611	91.2631	125.457
7.5277e+07	7.49306	91.3478	124.97
7.52776e+07	7.5	91.4324	124.496
7.52782e+07	7.50694	91.5171	124.034
7.52788e+07	7.51389	91.6018	123.584
7.52794e+07	7.52083	91.6864	123.146
7.528e+07	7.52778	91.7711	122.718
7.52806e+07	7.53472	91.8557	122.302
7.52812e+07	7.54167	91.9404	121.896
7.52818e+07	7.54861	92.0251	121.5
7.52824e+07	7.55556	92.1097	121.113
7.5283e+07	7.5625	92.1944	120.736
7.52836e+07	7.56944	92.279	120.368
7.52842e+07	7.57639	92.3637	120.009
7.52848e+07	7.58333	92.4484	119.658
7.52854e+07	7.59028	92.533	119.316
7.5286e+07	7.59722	92.6177	118.981
7.52866e+07	7.60417	92.7023	118.654
7.52872e+07	7.61111	92.787	118.335
7.52878e+07	7.61806	92.8717	118.023
7.52884e+07	7.625	92.9563	117.718
7.5289e+07	7.63194	93.041	117.419
7.52896e+07	7.63889	93.1256	117.127
7.52902e+07	7.64583	93.2103	116.842
7.52908e+07	7.65278	93.295	116.563
7.52914e+07	7.65972	93.3796	116.29
7.5292e+07	7.66667	93.4643	116.023
7.52926e+07	7.67361	93.5489	115.761
7.52932e+07	7.68056	93.6336	115.505
7.52938e+07	7.6875	93.7183	115.255
7.52944e+07	7.69444	93.8029	115.009
7.5295e+07	7.70139	93.8876	114.769
7.52956e+07	7.70833	93.9722	114.534
7.52962e+07	7.71528	94.0569	114.303
7.52968e+07	7.72222	94.1416	114.078
7.52974e+07	7.72917	94.2262	113.856
7.5298e+07	7.73611	94.3109	113.64
7.52986e+07	7.74306	94.3955	113.427
7.52992e+07	7.75	94.4802	113.219
7.52998e+07	7.75694	94.5648	113.015
7.53004e+07	7.76389	94.6495	112.815
7.5301e+07	7.77083	94.7342	112.619
7.53016e+07	7.77778	94.8188	112.427
7.53022e+07	7.78472	94.9035	112.238
7.53028e+07	7.79167	94.9881	112.053
7.53034e+07	7.79861	95.0728	111.872
7.5304e+07	7.80556	95.1575	111.694
7.53046e+07	7.8125	95.2421	111.519
7.53052e+07	7.81944	95.3268	111.348
7.53058e+07	7.82639	95.4114	111.179
7.53064e+07	7.83333	95.4961	111.014
7.5307e+07	7.84028	95.5808	110.853
7.53076e+07	7.84722	95.6654	110.694
7.53082e+07	7.85417	95.7501	110.538
7.53088e+07	7.86111	95.8347	110.384
7.53094e+07	7.86806	95.9194	110.234
7.531e+07	7.875	96.0041	110.086
7.53106e+07	7.88194	96.0887	109.941
7.53112e+07	7.88889	96.1734	109.799
7.53118e+07	7.89583	96.258	109.659
7.53124e+07	7.90278	96.3427	109.521
7.5313e+07	7.90972	96.4274	109.386
7.53136e+07	7.91667	96.512	109.254
7.53142e+07	7.92361	96.5967	109.123
7.53148e+07	7.93056	96.6813	108.995
7.53154e+07	7.9375	96.766	108.87
7.5316e+07	7.94444	96.8507	108.746
7.53166e+07	7.95139	96.9353	108.624
7.53172e+07	7.95833	97.02	108.505
7.53178e+07	7.96528	97.1046	108.387
7.53184e+07	7.97222	97.1893	108.272
7.5319e+07	7.97917	97.274	108.158
7.53196e+07	7.98611	97.3586	108.047
7.53202e+07	7.99306	97.4433	107.937
7.53208e+07	8	97.5279	107.829
7.53214e+07	8.00694	97.6126	107.723
7.5322e+07	8.01389	97.6973	107.619
7.53226e+07	8.02083	97.7819	107.516
7.53232e+07	8.02778	97.8666	107.415
7.53238e+07	8.03472	97.9512	107.316
7.53244e+07	8.04167	98.0359	107.218
7.5325e+07	8.04861	98.1206	107.122
7.53256e+07	8.05556	98.2052	107.027
7.53262e+07	8.0625	98.2899	106.934
7.53268e+07	8.06944	98.3745	106.843
7.53274e+07	8.07639	98.4592	106.753
7.5328e+07	8.08333	98.5439	106.664
7.53286e+07	8.09028	98.6285	106.577
7.53292e+07	8.09722	98.7132	106.491
7.53298e+07	8.10417	98.7978	106.407
7.53304e+07	8.11111	98.8825	106.324
7.5331e+07	8.11806	98.9672	106.243
7.53316e+07	8.125	99.0518	106.162
7.53322e+07	8.13194	99.1365	106.083
7.53328e+07	8.13889	99.2211	106.006
7.53334e+07	8.14583	99.3058	105.929
7.5334e+07	8.15278	99.3905	105.854
7.53346e+07	8.15972	99.4751	105.78
7.53352e+07	8.16667	99.5598	105.707
7.53358e+07	8.17361	99.6444	105.635
7.53364e+07	8.18056	99.7291	105.564
7.5337e+07	8.1875	99.8137	105.495
7.53376e+07	8.19444	99.8984	105.426
7.53382e+07	8.20139	99.9831	105.359
7.53388e+07	8.20833	100.068	105.293
7.53394e+07	8.21528	100.152	105.227
7.534e+07	8.22222	100.237	105.163
7.53406e+07	8.22917	100.322	105.099
7.53412e+07	8.23611	100.406	105.037
7.53418e+07	8.24306	100.491	104.975
7.53424e+07	8.25	100.576	104.915
7.5343e+07	8.25694	100.66	104.855
7.53436e+07	8.26389	100.745	104.796
7.53442e+07	8.27083	100.83	104.738
7.53448e+07	8.27778	100.914	104.681
7.53454e+07	8.28472	100.999	104.625
7.5346e+07	8.29167	101.084	104.57
7.53466e+07	8.29861	101.168	104.515
7.53472e+07	8.30556	101.253	104.461
7.53478e+07	8.3125	101.338	104.408
7.53484e+07	8.31944	101.422	104.356
7.5349e+07	8.32639	101.507	104.305
7.53496e+07	8.33333	101.592	104.254
7.53502e+07	8.34028	101.676	104.204
7.53508e+07	8.34722	101.761	104.155
7.53514e+07	8.35417	101.846	104.106
7.5352e+07	8.36111	101.93	104.058
7.53526e+07	8.36806	102.015	104.011
7.53532e+07	8.375	102.1	103.964
7.53538e+07	8.38194	102.184	103.919
7.53544e+07	8.38889	102.269	103.873
7.5355e+07	8.39583	102.354	103.829
7.53556e+07	8.40278	102.438	103.785
7.53562e+07	8.40972	102.523	103.741
7.53568e+07	8.41667	102.608	103.698
7.53574e+07	8.42361	102.692	103.656
7.5358e+07	8.43056	102.777	103.614
7.53586e+07	8.4375	102.861	103.573
7.53592e+07	8.44444	102.946	103.533
7.53598e+07	8.45139	103.031	103.493
7.53604e+07	8.45833	103.115	103.453
7.5361e+07	8.46528	103.2	103.414
7.53616e+07	8.47222	103.285	103.376
7.53622e+07	8.47917	103.369	103.338
7.53628e+07	8.48611	103.454	103.301
7.53634e+07	8.49306	103.539	103.264
7.5364e+07	8.5	103.623	103.227
7.53646e+07	8.50694	103.708	103.191
7.53652e+07	8.51389	103.793	103.156
7.53658e+07	8.52083	103.877	103.121
7.53664e+07	8.52778	103.962	103.086
7.5367e+07	8.53472	104.047	103.052
7.53676e+07	8.54167	104.131	103.018
7.53682e+07	8.54861	104.216	102.985
7.53688e+07	8.55556	104.301	102.952
7.53694e+07	8.5625	104.385	102.92
7.537e+07	8.56944	104.47	102.888
7.53706e+07	8.57639	104.555	102.856
7.53712e+07	8.58333	104.639	102.825
7.53718e+07	8.59028	104.724	102.794
7.53724e+07	8.59722	104.809	102.763
7.5373e+07	8.60417	104.893	102.733
7.53736e+07	8.61111	104.978	102.703
7.53742e+07	8.61806	105.063	102.674
7.53748e+07	8.625	105.147	102.645
7.53754e+07	8.63194	105.232	102.616
7.5376e+07	8.63889	105.317	102.588
7.53766e+07	8.64583	105.401	102.56
7.53772e+07	8.65278	105.486	102.532
7.53778e+07	8.65972	105.571	102.505
7.53784e+07	8.66667	105.655	102.478
7.5379e+07	8.67361	105.74	102.451
7.53796e+07	8.68056	105.825	102.425
7.53802e+07	8.6875	105.909	102.399
7.53808e+07	8.69444	105.994	102.373
7.53814e+07	8.70139	106.079	102.347
7.5382e+07	8.70833	106.163	102.322
7.53826e+07	8.71528	106.248	102.297
7.53832e+07	8.72222	106.333	102.273
7.53838e+07	8.72917	106.417	102.248
7.53844e+07	8.73611	106.502	102.224
7.5385e+07	8.74306	106.587	102.2
7.53856e+07	8.75	106.671	102.177
7.53862e+07	8.75694	106.756	102.153
7.53868e+07	8.76389	106.841	102.13
7.53874e+07	8.77083	106.925	102.108
7.5388e+07	8.77778	107.01	102.085
7.53886e+07	8.78472	107.094	102.063
7.53892e+07	8.79167	107.179	102.041
7.53898e+07	8.79861	107.264	102.019
7.53904e+07	8.80556	107.348	101.997
7.5391e+07	8.8125	107.433	101.976
7.53916e+07	8.81944	107.518	101.955
7.53922e+07	8.82639	107.602	101.934
7.53928e+07	8.83333	107.687	101.913
7.53934e+07	8.84028	107.772	101.893
7.5394e+07	8.84722	107.856	101.872
7.53946e+07	8.85417	107.941	101.852
7.53952e+07	8.86111	108.026	101.832
7.53958e+07	8.86806	108.11	101.813
7.53964e+07	8.875	108.195	101.793
7.5397e+07	8.88194	108.28	101.774
7.53976e+07	8.88889	108.364	101.755
7.53982e+07	8.89583	108.449	101.736
7.53988e+07	8.90278	108.534	101.717
7.53994e+07	8.90972	108.618	101.699
7.54e+07	8.91667	108.703	101.68
7.54006e+07	8.92361	108.788	101.662
7.54012e+07	8.93056	108.872	101.644
7.54018e+07	8.9375	108.957	101.626
7.54024e+07	8.94444	109.042	101.609
7.5403e+07	8.95139	109.126	101.591
7.54036e+07	8.95833	109.211	101.574
7.54042e+07	8.96528	109.296	101.557
7.54048e+07	8.97222	109.38	101.54
7.54054e+07	8.97917	109.465	101.523
7.5406e+07	8.98611	109.55	101.506
7.54066e+07	8.99306	109.634	101.49
7.54072e+07	9	109.719	101.473
7.54078e+07	9.00694	109.804	101.457
7.54084e+07	9.01389	109.888	101.441
7.5409e+07	9.02083	109.973	101.425
7.54096e+07	9.02778	110.058	101.409
7.54102e+07	9.03472	110.142	101.393
7.54108e+07	9.04167	110.227	101.378
7.54114e+07	9.04861	110.312	101.363
7.5412e+07	9.05556	110.396	101.347
7.54126e+07	9.0625	110.481	101.332
7.54132e+07	9.06944	110.566	101.317
7.54138e+07	9.07639	110.65	101.302
7.54144e+07	9.08333	110.735	101.287
7.5415e+07	9.09028	110.82	101.273
7.54156e+07	9.09722	110.904	101.258
7.54162e+07	9.10417	110.989	101.244
7.54168e+07	9.11111	111.073	101.23
7.54174e+07	9.11806	111.158	101.215
7.5418e+07	9.125	111.243	101.201
7.54186e+07	9.13194	111.327	101.188
7.54192e+07	9.13889	111.412	101.174
7.54198e+07	9.14583	111.497	101.16
7.54204e+07	9.15278	111.581	101.146
7.5421e+07	9.15972	111.666	101.133
7.54216e+07	9.16667	111.751	101.119
7.54222e+07	9.17361	111.835	101.106
7.54228e+07	9.18056	111.92	101.093
7.54234e+07	9.1875	112.005	101.08
7.5424e+07	9.19444	112.089	101.067
7.54246e+07	9.20139	112.174	101.054
7.54252e+07	9.20833	112.259	101.041
7.54258e+07	9.21528	112.343	101.029
7.54264e+07	9.22222	112.428	101.016
7.5427e+07	9.22917	112.513	101.003
7.54276e+07	9.23611	112.597	100.991
7.54282e+07	9.24306	112.682	100.979
7.54288e+07	9.25	112.767	100.966
7.54294e+07	9.25694	112.851	100.954
7.543e+07	9.26389	112.936	100.942
7.54306e+07	9.27083	113.021	100.93
7.54312e+07	9.27778	113.105	100.918
7.54318e+07	9.28472	113.19	100.906
7.54324e+07	9.29167	113.275	100.895
7.5433e+07	9.29861	113.359	100.883
7.54336e+07	9.30556	113.444	100.871
7.54342e+07	9.3125	113.529	100.86
7.54348e+07	9.31944	113.613	100.848
7.54354e+07	9.32639	113.698	100.837
7.5436e+07	9.33333	113.783	100.826
7.54366e+07	9.34028	113.867	100.815
7.54372e+07	9.34722	113.952	100.803
7.54378e+07	9.35417	114.037	100.792
7.54384e+07	9.36111	114.121	100.781
7.5439e+07	9.36806	114.206	100.77
7.54396e+07	9.375	114.291	100.76
7.54402e+07	9.38194	114.375	100.749
7.54408e+07	9.38889	114.46	100.738
7.54414e+07	9.39583	114.545	100.727
7.5442e+07	9.40278	114.629	100.717
7.54426e+07	9.40972	114.714	100.706
7.54432e+07	9.41667	114.799	100.696
7.54438e+07	9.42361	114.883	100.685
7.54444e+07	9.43056	114.968	100.675
7.5445e+07	9.4375	115.052	100.665
7.54456e+07	9.44444	115.137	100.655
7.54462e+07	9.45139	115.222	100.644
7.54468e+07	9.45833	115.306	100.634
7.54474e+07	9.46528	115.391	100.624
7.5448e+07	9.47222	115.476	100.614
7.54486e+07	9.47917	115.56	100.604
7.54492e+07	9.48611	115.645	100.595
7.54498e+07	9.49306	115.73	100.585
7.54504e+07	9.5	115.814	100.575
7.5451e+07	9.50694	115.899	100.565
7.54516e+07	9.51389	115.984	100.556
7.54522e+07	9.52083	116.068	100.546
7.54528e+07	9.52778	116.153	100.536
7.54534e+07	9.53472	116.238	100.527
7.5454e+07	9.54167	116.322	100.517
7.54546e+07	9.54861	116.407	100.508
7.54552e+07	9.55556	116.492	100.499
7.54558e+07	9.5625	116.576	100.489
7.54564e+07	9.56944	116.661	100.48
7.5457e+07	9.57639	116.746	100.471
7.54576e+07	9.58333	116.83	100.462
7.54582e+07	9.59028	116.915	100.453
7.54588e+07	9.59722	117	100.444
7.54594e+07	9.60417	117.084	100.434
7.546e+07	9.61111	117.169	100.425
7.54606e+07	9.61806	117.254	100.417
7.54612e+07	9.625	117.338	100.408
7.54618e+07	9.63194	117.423	100.399
7.54624e+07	9.63889	117.508	100.39
7.5463e+07	9.64583	117.592	100.381
7.54636e+07	9.65278	117.677	100.372
7.54642e+07	9.65972	117.762	100.364
7.54648e+07	9.66667	117.846	100.355
7.54654e+07	9.67361	117.931	100.346
7.5466e+07	9.68056	118.016	100.338
7.54666e+07	9.6875	118.1	100.329
7.54672e+07	9.69444	118.185	100.321
7.54678e+07	9.70139	118.27	100.312
7.54684e+07	9.70833	118.354	100.304
7.5469e+07	9.71528	118.439	100.296
7.54696e+07	9.72222	118.524	100.287
7.54702e+07	9.72917	118.608	100.279
7.54708e+07	9.73611	118.693	100.271
7.54714e+07	9.74306	118.778	100.262
7.5472e+07	9.75	118.862	100.254
7.54726e+07	9.75694	118.947	100.246
7.54732e+07	9.76389	119.031	100.238
7.54738e+07	9.77083	119.116	100.23
7.54744e+07	9.77778	119.201	100.222
7.5475e+07	9.78472	119.285	100.214
7.54756e+07	9.79167	119.37	100.206
7.54762e+07	9.79861	119.455	100.198
7.54768e+07	9.80556	119.539	100.19
7.54774e+07	9.8125	119.624	100.182
7.5478e+07	9.81944	119.709	100.174
7.54786e+07	9.82639	119.793	100.166
7.54792e+07	9.83333	119.878	100.158
7.54798e+07	9.84028	119.963	100.15
7.54804e+07	9.84722	120.047	100.143
7.5481e+07	9.85417	120.132	100.135
7.54816e+07	9.86111	120.217	100.127
7.54822e+07	9.86806	120.301	100.119
7.54828e+07	9.875	120.386	100.112
7.54834e+07	9.88194	120.471	100.104
7.5484e+07	9.88889	120.555	100.097
7.54846e+07	9.89583	120.64	100.089
7.54852e+07	9.90278	120.725	100.081
7.54858e+07	9.90972	120.809	100.074
7.54864e+07	9.91667	120.894	100.066
7.5487e+07	9.92361	120.979	100.059
7.54876e+07	9.93056	121.063	100.052
7.54882e+07	9.9375	121.148	100.044
7.54888e+07	9.94444	121.233	100.037
7.54894e+07	9.95139	121.317	100.029
7.549e+07	9.95833	121.402	100.022
7.54906e+07	9.96528	121.487	100.015
7.54912e+07	9.97222	121.571	100.007
7.54918e+07	9.97917	121.656	100
7.54924e+07	9.98611	121.741	99.993
7.5493e+07	9.99306	121.825	99.9857
7.54936e+07	10	121.91	99.9786
7.54942e+07	10.0069	121.995	99.9714
7.54948e+07	10.0139	122.079	99.9642
7.54954e+07	10.0208	122.164	99.9571
7.5496e+07	10.0278	122.249	99.95
7.54966e+07	10.0347	122.333	99.9429
7.54972e+07	10.0417	122.418	99.9359
7.54978e+07	10.0486	122.503	99.9288
7.54984e+07	10.0556	122.587	99.9218
7.5499e+07	10.0625	122.672	99.9148
7.54996e+07	10.0694	122.757	99.9079
7.55002e+07	10.0764	122.841	99.9009
7.55008e+07	10.0833	122.926	99.894
7.55014e+07	10.0903	123.01	99.8871
7.5502e+07	10.0972	123.095	99.8802
7.55026e+07	10.1042	123.18	99.8733
7.55032e+07	10.1111	123.264	99.8665
7.55038e+07	10.1181	123.349	99.8596
7.55044e+07	10.125	123.434	99.8528
7.5505e+07	10.1319	123.518	99.846
7.55056e+07	10.1389	123.603	99.8393
7.55062e+07	10.1458	123.688	99.8325
7.55068e+07	10.1528	123.772	99.8258
7.55074e+07	10.1597	123.857	99.8191
7.5508e+07	10.1667	123.942	99.8124
7.55086e+07	10.1736	124.026	99.8057
7.55092e+07	10.1806	124.111	99.799
7.55098e+07	10.1875	124.196	99.7924
7.55104e+07	10.1944	124.28	99.7858
7.5511e+07	10.2014	124.365	99.7792
7.55116e+07	10.2083	124.45	99.7726
7.55122e+07	10.2153	124.534	99.766
7.55128e+07	10.2222	124.619	99.7595
7.55134e+07	10.2292	124.704	99.7529
7.5514e+07	10.2361	124.788	99.7464
7.55146e+07	10.2431	124.873	99.7399
7.55152e+07	10.25	124.958	99.7334
7.55158e+07	10.2569	125.042	99.7269
7.55164e+07	10.2639	125.127	99.7205
7.5517e+07	10.2708	125.212	99.714
7.55176e+07	10.2778	125.296	99.7076
7.55182e+07	10.2847	125.381	99.7012
7.55188e+07	10.2917	125.466	99.6948
7.55194e+07	10.2986	125.55	99.6885
7.552e+07	10.3056	125.635	99.6821
7.55206e+07	10.3125	125.72	99.6758
7.55212e+07	10.3194	125.804	99.6694
7.55218e+07	10.3264	125.889	99.6631
7.55224e+07	10.3333	125.974	99.6568
7.5523e+07	10.3403	126.058	99.6505
7.55236e+07	10.3472	126.143	99.6443
7.55242e+07	10.3542	126.228	99.638
7.55248e+07	10.3611	126.312	99.6318
7.55254e+07	10.3681	126.397	99.6256
7.5526e+07	10.375	126.482	99.6194
7.55266e+07	10.3819	126.566	99.6132
7.55272e+07	10.3889	126.651	99.607
7.55278e+07	10.3958	126.736	99.6008
7.55284e+07	10.4028	126.82	99.5947
7.5529e+07	10.4097	126.905	99.5885
7.55296e+07	10.4167	126.99	99.5824
7.55302e+07	10.4236	127.074	99.5763
7.55308e+07	10.4306	127.159	99.5702
7.55314e+07	10.4375	127.243	99.5641
7.5532e+07	10.4444	127.328	99.558
7.55326e+07	10.4514	127.413	99.552
7.55332e+07	10.4583	127.497	99.5459
7.55338e+07	10.4653	127.582	99.5399
7.55344e+07	10.4722	127.667	99.5339
7.5535e+07	10.4792	127.751	99.5279
7.55356e+07	10.4861	127.836	99.5219
7.55362e+07	10.4931	127.921	99.5159
7.55368e+07	10.5	128.005	99.5099
7.55374e+07	10.5069	128.09	99.504
7.5538e+07	10.5139	128.175	99.498
7.55386e+07	10.5208	128.259	99.4921
7.55392e+07	10.5278	128.344	99.4862
7.55398e+07	10.5347	128.429	99.4802
7.55404e+07	10.5417	128.513	99.4744
7.5541e+07	10.5486	128.598	99.4685
7.55416e+07	10.5556	128.683	99.4626
7.55422e+07	10.5625	128.767	99.4567
7.55428e+07	10.5694	128.852	99.4509
7.55434e+07	10.5764	128.937	99.445
7.5544e+07	10.5833	129.021	99.4392
7.55446e+07	10.5903	129.106	99.4334
7.55452e+07	10.5972	129.191	99.4276
7.55458e+07	10.6042	129.275	99.4218
7.55464e+07	10.6111	129.36	99.416
7.5547e+07	10.6181	129.445	99.4103
7.55476e+07	10.625	129.529	99.4045
7.55482e+07	10.6319	129.614	99.3987
7.55488e+07	10.6389	129.699	99.393
7.55494e+07	10.6458	129.783	99.3873
7.555e+07	10.6528	129.868	99.3816
7.55506e+07	10.6597	129.953	99.3759
7.55512e+07	10.6667	130.037	99.3702
7.55518e+07	10.6736	130.122	99.3645
7.55524e+07	10.6806	130.207	99.3588
7.5553e+07	10.6875	130.291	99.3531
7.55536e+07	10.6944	130.376	99.3475
7.55542e+07	10.7014	130.461	99.3419
7.55548e+07	10.7083	130.545	99.3362
7.55554e+07	10.7153	130.63	99.3306
7.5556e+07	10.7222	130.715	99.325
7.55566e+07	10.7292	130.799	99.3194
7.55572e+07	10.7361	130.884	99.3138
7.55578e+07	10.7431	130.969	99.3082
7.55584e+07	10.75	131.053	99.3026
7.5559e+07	10.7569	131.138	99.2971
7.55596e+07	10.7639	131.222	99.2915
7.55602e+07	10.7708	131.307	99.286
7.55608e+07	10.7778	131.392	99.2804
7.55614e+07	10.7847	131.476	99.2749
7.5562e+07	10.7917	131.561	99.2694
7.55626e+07	10.7986	131.646	99.2639
7.55632e+07	10.8056	131.73	99.2584
7.55638e+07	10.8125	131.815	99.2529
7.55644e+07	10.8194	131.9	99.2474
7.5565e+07	10.8264	131.984	99.242
7.55656e+07	10.8333	132.069	99.2365
7.55662e+07	10.8403	132.154	99.2311
7.55668e+07	10.8472	132.238	99.2256
7.55674e+07	10.8542	132.323	99.2202
7.5568e+07	10.8611	132.408	99.2148
7.55686e+07	10.8681	132.492	99.2094
7.55692e+07	10.875	132.577	99.204
7.55698e+07	10.8819	132.662	99.1986
7.55704e+07	10.8889	132.746	99.1932
7.5571e+07	10.8958	132.831	99.1878
7.55716e+07	10.9028	132.916	99.1824
7.55722e+07	10.9097	133	99.1771
7.55728e+07	10.9167	133.085	99.1717
7.55734e+07	10.9236	133.17	99.1664
7.5574e+07	10.9306	133.254	99.161
7.55746e+07	10.9375	133.339	99.1557
7.55752e+07	10.9444	133.424	99.1504
7.55758e+07	10.9514	133.508	99.1451
7.55764e+07	10.9583	133.593	99.1398
7.5577e+07	10.9653	133.678	99.1345
7.55776e+07	10.9722	133.762	99.1292
7.55782e+07	10.9792	133.847	99.1239
7.55788e+07	10.9861	133.932	99.1186
7.55794e+07	10.9931	134.016	99.1134
7.558e+07	11	134.101	99.1081
7.55806e+07	11.0069	134.186	99.1029
7.55812e+07	11.0139	134.27	99.0976
7.55818e+07	11.0208	134.355	99.0924
7.55824e+07	11.0278	134.44	99.0872
7.5583e+07	11.0347	134.524	99.082
7.55836e+07	11.0417	134.609	99.0768
7.55842e+07	11.0486	134.694	99.0716
7.55848e+07	11.0556	134.778	99.0664
7.55854e+07	11.0625	134.863	99.0612
7.5586e+07	11.0694	134.948	99.056
7.55866e+07	11.0764	135.032	99.0509
7.55872e+07	11.0833	135.117	99.0457
7.55878e+07	11.0903	135.201	99.0405
7.55884e+07	11.0972	135.286	99.0354
7.5589e+07	11.1042	135.371	99.0303
7.55896e+07	11.1111	135.455	99.0251
7.55902e+07	11.1181	135.54	99.02
7.55908e+07	11.125	135.625	99.0149
7.55914e+07	11.1319	135.709	99.0098
7.5592e+07	11.1389	135.794	99.0047
7.55926e+07	11.1458	135.879	98.9996
7.55932e+07	11.1528	135.963	98.9945
7.55938e+07	11.1597	136.048	98.9894
7.55944e+07	11.1667	136.133	98.9844
7.5595e+07	11.1736	136.217	98.9793
7.55956e+07	11.1806	136.302	98.9742
7.55962e+07	11.1875	136.387	98.9692
7.55968e+07	11.1944	136.471	98.9642
7.55974e+07	11.2014	136.556	98.9591
7.5598e+07	11.2083	136.641	98.9541
7.55986e+07	11.2153	136.725	98.9491
7.55992e+07	11.2222	136.81	98.944
7.55998e+07	11.2292	136.895	98.939
7.56004e+07	11.2361	136.979	98.934
7.5601e+07	11.2431	137.064	98.929
7.56016e+07	11.25	137.149	98.9241
7.56022e+07	11.2569	137.233	98.9191
7.56028e+07	11.2639	137.318	98.9141
7.56034e+07	11.2708	137.403	98.9091
7.5604e+07	11.2778	137.487	98.9042
7.56046e+07	11.2847	137.572	98.8992
7.56052e+07	11.2917	137.657	98.8943
7.56058e+07	11.2986	137.741	98.8893
7.56064e+07	11.3056	137.826	98.8844
7.5607e+07	11.3125	137.911	98.8795
7.56076e+07	11.3194	137.995	98.8746
7.56082e+07	11.3264	138.08	98.8696
7.56088e+07	11.3333	138.165	98.8647
7.56094e+07	11.3403	138.249	98.8598
7.561e+07	11.3472	138.334	98.8549
7.56106e+07	11.3542	138.419	98.85
7.56112e+07	11.3611	138.503	98.8452
7.56118e+07	11.3681	138.588	98.8403
7.56124e+07	11.375	138.673	98.8354
7.5613e+07	11.3819	138.757	98.8306
7.56136e+07	11.3889	138.842	98.8257
7.56142e+07	11.3958	138.927	98.8209
7.56148e+07	11.4028	139.011	98.816
7.56154e+07	11.4097	139.096	98.8112
7.5616e+07	11.4167	139.18	98.8063
7.56166e+07	11.4236	139.265	98.8015
7.56172e+07	11.4306	139.35	98.7967
7.56178e+07	11.4375	139.434	98.7919
7.56184e+07	11.4444	139.519	98.7871
7.5619e+07	11.4514	139.604	98.7823
7.56196e+07	11.4583	139.688	98.7775
7.56202e+07	11.4653	139.773	98.7727
7.56208e+07	11.4722	139.858	98.7679
7.56214e+07	11.4792	139.942	98.7631
7.5622e+07	11.4861	140.027	98.7584
7.56226e+07	11.4931	140.112	98.7536
7.56232e+07	11.5	140.196	98.7488
7.56238e+07	11.5069	140.281	98.7441
7.56244e+07	11.5139	140.366	98.7393
7.5625e+07	11.5208	140.45	98.7346
7.56256e+07	11.5278	140.535	98.7299
7.56262e+07	11.5347	140.62	98.7251
7.56268e+07	11.5417	140.704	98.7204
7.56274e+07	11.5486	140.789	98.7157
7.5628e+07	11.5556	140.874	98.711
7.56286e+07	11.5625	140.958	98.7063
7.56292e+07	11.5694	141.043	98.7016
7.56298e+07	11.5764	141.128	98.6969
7.56304e+07	11.5833	141.212	98.6922
7.5631e+07	11.5903	141.297	98.6875
7.56316e+07	11.5972	141.382	98.6828
7.56322e+07	11.6042	141.466	98.6781
7.56328e+07	11.6111	141.551	98.6735
7.56334e+07	11.6181	141.636	98.6688
7.5634e+07	11.625	141.72	98.6642
7.56346e+07	11.6319	141.805	98.6595
7.56352e+07	11.6389	141.89	98.6549
7.56358e+07	11.6458	141.974	98.6502
7.56364e+07	11.6528	142.059	98.6456
7.5637e+07	11.6597	142.144	98.641
7.56376e+07	11.6667	142.228	98.6363
7.56382e+07	11.6736	142.313	98.6317
7.56388e+07	11.6806	142.398	98.6271
7.56394e+07	11.6875	142.482	98.6225
7.564e+07	11.6944	142.567	98.6179
7.56406e+07	11.7014	142.652	98.6133
7.56412e+07	11.7083	142.736	98.6087
7.56418e+07	11.7153	142.821	98.6041
7.56424e+07	11.7222	142.906	98.5995
7.5643e+07	11.7292	142.99	98.595
7.56436e+07	11.7361	143.075	98.5904
7.56442e+07	11.7431	143.159	98.5858
7.56448e+07	11.75	143.244	98.5813
7.56454e+07	11.7569	143.329	98.5767
7.5646e+07	11.7639	143.413	98.5722
7.56466e+07	11.7708	143.498	98.5676
7.56472e+07	11.7778	143.583	98.5631
7.56478e+07	11.7847	143.667	98.5585
7.56484e+07	11.7917	143.752	98.554
7.5649e+07	11.7986	143.837	98.5495
7.56496e+07	11.8056	143.921	98.545
7.56502e+07	11.8125	144.006	98.5405
7.56508e+07	11.8194	144.091	98.536
7.56514e+07	11.8264	144.175	98.5314
7.5652e+07	11.8333	144.26	98.527
7.56526e+07	11.8403	144.345	98.5225
7.56532e+07	11.8472	144.429	98.518
7.56538e+07	11.8542	144.514	98.5135
7.56544e+07	11.8611	144.599	98.509
7.5655e+07	11.8681	144.683	98.5045
7.56556e+07	11.875	144.768	98.5001
7.56562e+07	11.8819	144.853	98.4956
7.56568e+07	11.8889	144.937	98.4911
7.56574e+07	11.8958	145.022	98.4867
7.5658e+07	11.9028	145.107	98.4822
7.56586e+07	11.9097	145.191	98.4778
7.56592e+07	11.9167	145.276	98.4734
7.56598e+07	11.9236	145.361	98.4689
7.56604e+07	11.9306	145.445	98.4645
7.5661e+07	11.9375	145.53	98.4601
7.56616e+07	11.9444	145.615	98.4557
7.56622e+07	11.9514	145.699	98.4512
7.56628e+07	11.9583	145.784	98.4468
7.56634e+07	11.9653	145.869	98.4424
7.5664e+07	11.9722	145.953	98.438
7.56646e+07	11.9792	146.038	98.4336
7.56652e+07	11.9861	146.123	98.4292
7.56658e+07	11.9931	146.207	98.4248
7.56664e+07	12	146.292	98.4205
7.5667e+07	12.0069	146.377	98.4161
7.56676e+07	12.0139	146.461	98.4117
7.56682e+07	12.0208	146.546	98.4073
7.56688e+07	12.0278	146.631	98.403
7.56694e+07	12.0347	146.715	98.3986
7.567e+07	12.0417	146.8	98.3943
7.56706e+07	12.0486	146.885	98.3899
7.56712e+07	12.0556	146.969	98.3856
7.56718e+07	12.0625	147.054	98.3812
7.56724e+07	12.0694	147.139	98.3769
7.5673e+07	12.0764	147.223	98.3726
7.56736e+07	12.0833	147.308	98.3682
7.56742e+07	12.0903	147.392	98.3639
7.56748e+07	12.0972	147.477	98.3596
7.56754e+07	12.1042	147.562	98.3553
7.5676e+07	12.1111	147.646	98.351
7.56766e+07	12.1181	147.731	98.3467
7.56772e+07	12.125	147.816	98.3424
7.56778e+07	12.1319	147.9	98.3381
7.56784e+07	12.1389	147.985	98.3338
7.5679e+07	12.1458	148.07	98.3295
7.56796e+07	12.1528	148.154	98.3252
7.56802e+07	12.1597	148.239	98.3209
7.56808e+07	12.1667	148.324	98.3167
7.56814e+07	12.1736	148.408	98.3124
7.5682e+07	12.1806	148.493	98.3081
7.56826e+07	12.1875	148.578	98.3039
7.56832e+07	12.1944	148.662	98.2996
7.56838e+07	12.2014	148.747	98.2954
7.56844e+07	12.2083	148.832	98.2911
7.5685e+07	12.2153	148.916	98.2869
7.56856e+07	12.2222	149.001	98.2826
7.56862e+07	12.2292	149.086	98.2784
7.56868e+07	12.2361	149.17	98.2742
7.56874e+07	12.2431	149.255	98.27
7.5688e+07	12.25	149.34	98.2657
7.56886e+07	12.2569	149.424	98.2615
7.56892e+07	12.2639	149.509	98.2573
7.56898e+07	12.2708	149.594	98.2531
7.56904e+07	12.2778	149.678	98.2489
7.5691e+07	12.2847	149.763	98.2447
7.56916e+07	12.2917	149.848	98.2405
7.56922e+07	12.2986	149.932	98.2363
7.56928e+07	12.3056	150.017	98.2321
7.56934e+07	12.3125	150.102	98.2279
7.5694e+07	12.3194	150.186	98.2237
7.56946e+07	12.3264	150.271	98.2196
7.56952e+07	12.3333	150.356	98.2154
7.56958e+07	12.3403	150.44	98.2112
7.56964e+07	12.3472	150.525	98.2071
7.5697e+07	12.3542	150.61	98.2029
7.56976e+07	12.3611	150.694	98.1988
7.56982e+07	12.3681	150.779	98.1946
7.56988e+07	12.375	150.864	98.1905
7.56994e+07	12.3819	150.948	98.1863
7.57e+07	12.3889	151.033	98.1822
7.57006e+07	12.3958	151.118	98.178
7.57012e+07	12.4028	151.202	98.1739
7.57018e+07	12.4097	151.287	98.1698
7.57024e+07	12.4167	151.371	98.1657
7.5703e+07	12.4236	151.456	98.1615
7.57036e+07	12.4306	151.541	98.1574
7.57042e+07	12.4375	151.625	98.1533
7.57048e+07	12.4444	151.71	98.1492
7.57054e+07	12.4514	151.795	98.1451
7.5706e+07	12.4583	151.879	98.141
7.57066e+07	12.4653	151.964	98.1369
7.57072e+07	12.4722	152.049	98.1328
7.57078e+07	12.4792	152.133	98.1287
7.57084e+07	12.4861	152.218	98.1246
7.5709e+07	12.4931	152.303	98.1206
7.57096e+07	12.5	152.387	98.1165
7.57102e+07	12.5069	152.472	98.1124
7.57108e+07	12.5139	152.557	98.1084
7.57114e+07	12.5208	152.641	98.1043
7.5712e+07	12.5278	152.726	98.1002
7.57126e+07	12.5347	152.811	98.0962
7.57132e+07	12.5417	152.895	98.0921
7.57138e+07	12.5486	152.98	98.0881
7.57144e+07	12.5556	153.065	98.084
7.5715e+07	12.5625	153.149	98.08
7.57156e+07	12.5694	153.234	98.0759
7.57162e+07	12.5764	153.319	98.0719
7.57168e+07	12.5833	153.403	98.0679
7.57174e+07	12.5903	153.488	98.0639
7.5718e+07	12.5972	153.573	98.0598
7.57186e+07	12.6042	153.657	98.0558
7.57192e+07	12.6111	153.742	98.0518
7.57198e+07	12.6181	153.827	98.0478
7.57204e+07	12.625	153.911	98.0438
7.5721e+07	12.6319	153.996	98.0398
7.57216e+07	12.6389	154.081	98.0358
7.57222e+07	12.6458	154.165	98.0318
7.57228e+07	12.6528	154.25	98.0278
7.57234e+07	12.6597	154.335	98.0238
7.5724e+07	12.6667	154.419	98.0198
7.57246e+07	12.6736	154.504	98.0158
7.57252e+07	12.6806	154.589	98.0119
7.57258e+07	12.6875	154.673	98.0079
7.57264e+07	12.6944	154.758	98.0039
7.5727e+07	12.7014	154.843	97.9999
7.57276e+07	12.7083	154.927	97.996
7.57282e+07	12.7153	155.012	97.992
7.57288e+07	12.7222	155.097	97.9881
7.57294e+07	12.7292	155.181	97.9841
7.573e+07	12.7361	155.266	97.9802
7.57306e+07	12.7431	155.35	97.9762
7.57312e+07	12.75	155.435	97.9723
7.57318e+07	12.7569	155.52	97.9683
7.57324e+07	12.7639	155.604	97.9644
7.5733e+07	12.7708	155.689	97.9605
7.57336e+07	12.7778	155.774	97.9565
7.57342e+07	12.7847	155.858	97.9526
7.57348e+07	12.7917	155.943	97.9487
7.57354e+07	12.7986	156.028	97.9448
7.5736e+07	12.8056	156.112	97.9409
7.57366e+07	12.8125	156.197	97.937
7.57372e+07	12.8194	156.282	97.9331
7.57378e+07	12.8264	156.366	97.9291
7.57384e+07	12.8333	156.451	97.9252
7.5739e+07	12.8403	156.536	97.9214
7.57396e+07	12.8472	156.62	97.9175
7.57402e+07	12.8542	156.705	97.9136
7.57408e+07	12.8611	156.79	97.9097
7.57414e+07	12.8681	156.874	97.9058
7.5742e+07	12.875	156.959	97.9019
7.57426e+07	12.8819	157.044	97.898
7.57432e+07	12.8889	157.128	97.8942
7.57438e+07	12.8958	157.213	97.8903
7.57444e+07	12.9028	157.298	97.8864
7.5745e+07	12.9097	157.382	97.8826
7.57456e+07	12.9167	157.467	97.8787
7.57462e+07	12.9236	157.552	97.8749
7.57468e+07	12.9306	157.636	97.871
7.57474e+07	12.9375	157.721	97.8672
7.5748e+07	12.9444	157.806	97.8633
7.57486e+07	12.9514	157.89	97.8595
7.57492e+07	12.9583	157.975	97.8556
7.57498e+07	12.9653	158.06	97.8518
7.57504e+07	12.9722	158.144	97.848
7.5751e+07	12.9792	158.229	97.8441
7.57516e+07	12.9861	158.314	97.8403
7.57522e+07	12.9931	158.398	97.8365
7.57528e+07	13	158.483	97.8327
7.57534e+07	13.0069	158.568	97.8289
7.5754e+07	13.0139	158.652	97.8251
7.57546e+07	13.0208	158.737	97.8212
7.57552e+07	13.0278	158.822	97.8174
7.57558e+07	13.0347	158.906	97.8136
7.57564e+07	13.0417	158.991	97.8098
7.5757e+07	13.0486	159.076	97.806
7.57576e+07	13.0556	159.16	97.8023
7.57582e+07	13.0625	159.245	97.7985
7.57588e+07	13.0694	159.329	97.7947
7.57594e+07	13.0764	159.414	97.7909
7.576e+07	13.0833	159.499	97.7871
7.57606e+07	13.0903	159.583	97.7833
7.57612e+07	13.0972	159.668	97.7796
7.57618e+07	13.1042	159.753	97.7758
7.57624e+07	13.1111	159.837	97.772
7.5763e+07	13.1181	159.922	97.7683
7.57636e+07	13.125	160.007	97.7645
7.57642e+07	13.1319	160.091	97.7608
7.57648e+07	13.1389	160.176	97.757
7.57654e+07	13.1458	160.261	97.7532
7.5766e+07	13.1528	160.345	97.7495
7.57666e+07	13.1597	160.43	97.7458
7.57672e+07	13.1667	160.515	97.742
7.57678e+07	13.1736	160.599	97.7383
7.57684e+07	13.1806	160.684	97.7345
7.5769e+07	13.1875	160.769	97.7308
7.57696e+07	13.1944	160.853	97.7271
7.57702e+07	13.2014	160.938	97.7234
7.57708e+07	13.2083	161.023	97.7196
7.57714e+07	13.2153	161.107	97.7159
7.5772e+07	13.2222	161.192	97.7122
7.57726e+07	13.2292	161.277	97.7085
7.57732e+07	13.2361	161.361	97.7048
7.57738e+07	13.2431	161.446	97.7011
7.57744e+07	13.25	161.531	97.6974
7.5775e+07	13.2569	161.615	97.6937
7.57756e+07	13.2639	161.7	97.69
7.57762e+07	13.2708	161.785	97.6863
7.57768e+07	13.2778	161.869	97.6826
7.57774e+07	13.2847	161.954	97.6789
7.5778e+07	13.2917	162.039	97.6752
7.57786e+07	13.2986	162.123	97.6715
7.57792e+07	13.3056	162.208	97.6678
7.57798e+07	13.3125	162.293	97.6642
7.57804e+07	13.3194	162.377	97.6605
7.5781e+07	13.3264	162.462	97.6568
7.57816e+07	13.3333	162.547	97.6532
7.57822e+07	13.3403	162.631	97.6495
7.57828e+07	13.3472	162.716	97.6458
7.57834e+07	13.3542	162.801	97.6422
7.5784e+07	13.3611	162.885	97.6385
7.57846e+07	13.3681	162.97	97.6349
7.57852e+07	13.375	163.055	97.6312
7.57858e+07	13.3819	163.139	97.6276
7.57864e+07	13.3889	163.224	97.6239
7.5787e+07	13.3958	163.308	97.6203
7.57876e+07	13.4028	163.393	97.6166
7.57882e+07	13.4097	163.478	97.613
7.57888e+07	13.4167	163.562	97.6094
7.57894e+07	13.4236	163.647	97.6057
7.579e+07	13.4306	163.732	97.6021
7.57906e+07	13.4375	163.816	97.5985
7.57912e+07	13.4444	163.901	97.5949
7.57918e+07	13.4514	163.986	97.5913
7.57924e+07	13.4583	164.07	97.5876
7.5793e+07	13.4653	164.155	97.584
7.57936e+07	13.4722	164.24	97.5804
7.57942e+07	13.4792	164.324	97.5768
7.57948e+07	13.4861	164.409	97.5732
7.57954e+07	13.4931	164.494	97.5696
7.5796e+07	13.5	164.578	97.566
7.57966e+07	13.5069	164.663	97.5624
7.57972e+07	13.5139	164.748	97.5588
7.57978e+07	13.5208	164.832	97.5552
7.57984e+07	13.5278	164.917	97.5516
7.5799e+07	13.5347	165.002	97.5481
7.57996e+07	13.5417	165.086	97.5445
7.58002e+07	13.5486	165.171	97.5409
7.58008e+07	13.5556	165.256	97.5373
7.58014e+07	13.5625	165.34	97.5338
7.5802e+07	13.5694	165.425	97.5302
7.58026e+07	13.5764	165.51	97.5266
7.58032e+07	13.5833	165.594	97.5231
7.58038e+07	13.5903	165.679	97.5195
7.58044e+07	13.5972	165.764	97.5159
7.5805e+07	13.6042	165.848	97.5124
7.58056e+07	13.6111	165.933	97.5088
7.58062e+07	13.6181	166.018	97.5053
7.58068e+07	13.625	166.102	97.5017
7.58074e+07	13.6319	166.187	97.4982
7.5808e+07	13.6389	166.272	97.4947
7.58086e+07	13.6458	166.356	97.4911
7.58092e+07	13.6528	166.441	97.4876
7.58098e+07	13.6597	166.526	97.484
7.58104e+07	13.6667	166.61	97.4805
7.5811e+07	13.6736	166.695	97.477
7.58116e+07	13.6806	166.78	97.4735
7.58122e+07	13.6875	166.864	97.4699
7.58128e+07	13.6944	166.949	97.4664
7.58134e+07	13.7014	167.034	97.4629
7.5814e+07	13.7083	167.118	97.4594
7.58146e+07	13.7153	167.203	97.4559
7.58152e+07	13.7222	167.288	97.4524
7.58158e+07	13.7292	167.372	97.4489
7.58164e+07	13.7361	167.457	97.4454
7.5817e+07	13.7431	167.541	97.4419
7.58176e+07	13.75	167.626	97.4384
7.58182e+07	13.7569	167.711	97.4349
7.58188e+07	13.7639	167.795	97.4314
7.58194e+07	13.7708	167.88	97.4279
7.582e+07	13.7778	167.965	97.4244
7.58206e+07	13.7847	168.049	97.4209
7.58212e+07	13.7917	168.134	97.4174
7.58218e+07	13.7986	168.219	97.4139
7.58224e+07	13.8056	168.303	97.4105
7.5823e+07	13.8125	168.388	97.407
7.58236e+07	13.8194	168.473	97.4035
7.58242e+07	13.8264	168.557	97.4001
7.58248e+07	13.8333	168.642	97.3966
7.58254e+07	13.8403	168.727	97.3931
7.5826e+07	13.8472	168.811	97.3897
7.58266e+07	13.8542	168.896	97.3862
7.58272e+07	13.8611	168.981	97.3827
7.58278e+07	13.8681	169.065	97.3793
7.58284e+07	13.875	169.15	97.3758
[truncated: 2,255 more rows]

## Sheet: Figure3-d
Time, s		Longitude	Latitude 85		Test
74629620	0	0	181.24		Longitude	Reference
74630220	0.00694444	0.0846597	181.252		0	183.4
74630820	0.0138889	0.169319	181.262		15	181.9
74631420	0.0208333	0.253979	181.271		30	176.8
74632020	0.0277778	0.338639	181.278		45	168.9
74632620	0.0347222	0.423298	181.283		60	154.4
74633220	0.0416667	0.507958	181.288		75	134.9
74633820	0.0486111	0.592618	181.291		90	112.4
74634420	0.0555556	0.677277	181.293		105	87
74635020	0.0625	0.761937	181.294		120	77
74635620	0.0694444	0.846597	181.293		135	70
74636220	0.0763889	0.931256	181.293		150	66.79
74636820	0.0833333	1.01592	181.291		165	63.89
74637420	0.0902778	1.10058	181.288		180	63.17
74638020	0.0972222	1.18524	181.285		195	61.72
74638620	0.104167	1.2699	181.281		210	60.7
74639220	0.111111	1.35455	181.277		225	60
74639820	0.118056	1.43921	181.271		240	63.17
74640420	0.125	1.52387	181.266		255	69.69
74641020	0.131944	1.60853	181.26		270	82.72
74641620	0.138889	1.69319	181.253		285	106.6
74642220	0.145833	1.77785	181.246		300	133.4
74642820	0.152778	1.86251	181.239		315	154.4
74643420	0.159722	1.94717	181.231		330	171.1
74644020	0.166667	2.03183	181.223		345	179
74644620	0.173611	2.11649	181.215		360	183.4
74645220	0.180556	2.20115	181.206
74645820	0.1875	2.28581	181.198
74646420	0.194444	2.37047	181.189
74647020	0.201389	2.45513	181.179
74647620	0.208333	2.53979	181.17
74648220	0.215278	2.62445	181.16
74648820	0.222222	2.70911	181.15
74649420	0.229167	2.79377	181.14
74650020	0.236111	2.87843	181.13
74650620	0.243056	2.96309	181.12
74651220	0.25	3.04775	181.109
74651820	0.256944	3.13241	181.099
74652420	0.263889	3.21707	181.088
74653020	0.270833	3.30173	181.077
74653620	0.277778	3.38639	181.066
74654220	0.284722	3.47105	181.055
74654820	0.291667	3.55571	181.044
74655420	0.298611	3.64037	181.033
74656020	0.305556	3.72503	181.022
7.46566e+07	0.3125	3.80969	181.011
7.46572e+07	0.319444	3.89434	181
7.46578e+07	0.326389	3.979	180.988
7.46584e+07	0.333333	4.06366	180.977
7.4659e+07	0.340278	4.14832	180.965
7.46596e+07	0.347222	4.23298	180.954
7.46602e+07	0.354167	4.31764	180.942
74660820	0.361111	4.4023	180.931
74661420	0.368056	4.48696	180.919
74662020	0.375	4.57162	180.907
74662620	0.381944	4.65628	180.896
74663220	0.388889	4.74094	180.884
74663820	0.395833	4.8256	180.872
74664420	0.402778	4.91026	180.86
7.4665e+07	0.409722	4.99492	180.848
7.46656e+07	0.416667	5.07958	180.837
7.46662e+07	0.423611	5.16424	180.825
7.46668e+07	0.430556	5.2489	180.813
7.46674e+07	0.4375	5.33356	180.801
7.4668e+07	0.444444	5.41822	180.789
7.46686e+07	0.451389	5.50288	180.777
7.46692e+07	0.458333	5.58754	180.765
7.46698e+07	0.465278	5.6722	180.753
7.46704e+07	0.472222	5.75686	180.741
7.4671e+07	0.479167	5.84152	180.729
7.46716e+07	0.486111	5.92618	180.717
7.46722e+07	0.493056	6.01084	180.705
7.46728e+07	0.5	6.0955	180.693
7.46734e+07	0.506944	6.18016	180.681
7.4674e+07	0.513889	6.26482	180.669
7.46746e+07	0.520833	6.34948	180.657
7.46752e+07	0.527778	6.43413	180.645
7.46758e+07	0.534722	6.51879	180.633
7.46764e+07	0.541667	6.60345	180.621
7.4677e+07	0.548611	6.68811	180.609
7.46776e+07	0.555556	6.77277	180.597
7.46782e+07	0.5625	6.85743	180.585
7.46788e+07	0.569444	6.94209	180.573
7.46794e+07	0.576389	7.02675	180.561
7.468e+07	0.583333	7.11141	180.548
7.46806e+07	0.590278	7.19607	180.536
7.46812e+07	0.597222	7.28073	180.524
7.46818e+07	0.604167	7.36539	180.512
7.46824e+07	0.611111	7.45005	180.5
7.4683e+07	0.618056	7.53471	180.488
7.46836e+07	0.625	7.61937	180.476
7.46842e+07	0.631944	7.70403	180.463
7.46848e+07	0.638889	7.78869	180.451
7.46854e+07	0.645833	7.87335	180.439
7.4686e+07	0.652778	7.95801	180.427
7.46866e+07	0.659722	8.04267	180.415
7.46872e+07	0.666667	8.12733	180.403
7.46878e+07	0.673611	8.21199	180.39
7.46884e+07	0.680556	8.29665	180.378
7.4689e+07	0.6875	8.38131	180.366
7.46896e+07	0.694444	8.46597	180.354
7.46902e+07	0.701389	8.55063	180.342
7.46908e+07	0.708333	8.63529	180.33
7.46914e+07	0.715278	8.71995	180.317
7.4692e+07	0.722222	8.80461	180.305
7.46926e+07	0.729167	8.88927	180.293
7.46932e+07	0.736111	8.97392	180.281
7.46938e+07	0.743056	9.05858	180.268
7.46944e+07	0.75	9.14324	180.256
7.4695e+07	0.756944	9.2279	180.244
7.46956e+07	0.763889	9.31256	180.232
7.46962e+07	0.770833	9.39722	180.22
7.46968e+07	0.777778	9.48188	180.207
7.46974e+07	0.784722	9.56654	180.195
7.4698e+07	0.791667	9.6512	180.183
7.46986e+07	0.798611	9.73586	180.171
7.46992e+07	0.805556	9.82052	180.158
7.46998e+07	0.8125	9.90518	180.146
7.47004e+07	0.819444	9.98984	180.134
7.4701e+07	0.826389	10.0745	180.122
7.47016e+07	0.833333	10.1592	180.109
7.47022e+07	0.840278	10.2438	180.097
7.47028e+07	0.847222	10.3285	180.085
7.47034e+07	0.854167	10.4131	180.073
7.4704e+07	0.861111	10.4978	180.06
7.47046e+07	0.868056	10.5825	180.048
7.47052e+07	0.875	10.6671	180.036
7.47058e+07	0.881944	10.7518	180.023
7.47064e+07	0.888889	10.8364	180.011
7.4707e+07	0.895833	10.9211	179.999
7.47076e+07	0.902778	11.0058	179.987
7.47082e+07	0.909722	11.0904	179.974
7.47088e+07	0.916667	11.1751	179.962
7.47094e+07	0.923611	11.2597	179.95
7.471e+07	0.930556	11.3444	179.937
7.47106e+07	0.9375	11.4291	179.925
7.47112e+07	0.944444	11.5137	179.913
7.47118e+07	0.951389	11.5984	179.9
7.47124e+07	0.958333	11.683	179.888
7.4713e+07	0.965278	11.7677	179.876
7.47136e+07	0.972222	11.8524	179.863
7.47142e+07	0.979167	11.937	179.851
7.47148e+07	0.986111	12.0217	179.839
7.47154e+07	0.993056	12.1063	179.826
7.4716e+07	1	12.191	179.814
7.47166e+07	1.00694	12.2757	179.802
7.47172e+07	1.01389	12.3603	179.789
7.47178e+07	1.02083	12.445	179.777
7.47184e+07	1.02778	12.5296	179.765
7.4719e+07	1.03472	12.6143	179.752
7.47196e+07	1.04167	12.699	179.74
7.47202e+07	1.04861	12.7836	179.728
7.47208e+07	1.05556	12.8683	179.715
7.47214e+07	1.0625	12.9529	179.703
7.4722e+07	1.06944	13.0376	179.691
7.47226e+07	1.07639	13.1222	179.678
7.47232e+07	1.08333	13.2069	179.666
7.47238e+07	1.09028	13.2916	179.653
7.47244e+07	1.09722	13.3762	179.641
7.4725e+07	1.10417	13.4609	179.629
7.47256e+07	1.11111	13.5455	179.616
7.47262e+07	1.11806	13.6302	179.604
7.47268e+07	1.125	13.7149	179.591
7.47274e+07	1.13194	13.7995	179.579
7.4728e+07	1.13889	13.8842	179.567
7.47286e+07	1.14583	13.9688	179.554
7.47292e+07	1.15278	14.0535	179.542
7.47298e+07	1.15972	14.1382	179.529
7.47304e+07	1.16667	14.2228	179.517
7.4731e+07	1.17361	14.3075	179.505
7.47316e+07	1.18056	14.3921	179.492
7.47322e+07	1.1875	14.4768	179.48
7.47328e+07	1.19444	14.5615	179.467
7.47334e+07	1.20139	14.6461	179.455
7.4734e+07	1.20833	14.7308	179.442
7.47346e+07	1.21528	14.8154	179.43
7.47352e+07	1.22222	14.9001	179.418
7.47358e+07	1.22917	14.9848	179.405
7.47364e+07	1.23611	15.0694	179.393
7.4737e+07	1.24306	15.1541	179.38
7.47376e+07	1.25	15.2387	179.368
7.47382e+07	1.25694	15.3234	179.355
7.47388e+07	1.26389	15.4081	179.343
7.47394e+07	1.27083	15.4927	179.33
7.474e+07	1.27778	15.5774	179.318
7.47406e+07	1.28472	15.662	179.305
7.47412e+07	1.29167	15.7467	179.293
7.47418e+07	1.29861	15.8314	179.281
7.47424e+07	1.30556	15.916	179.268
7.4743e+07	1.3125	16.0007	179.256
7.47436e+07	1.31944	16.0853	179.243
7.47442e+07	1.32639	16.17	179.231
7.47448e+07	1.33333	16.2547	179.218
7.47454e+07	1.34028	16.3393	179.206
7.4746e+07	1.34722	16.424	179.193
7.47466e+07	1.35417	16.5086	179.181
7.47472e+07	1.36111	16.5933	179.168
7.47478e+07	1.36806	16.678	179.156
7.47484e+07	1.375	16.7626	179.143
7.4749e+07	1.38194	16.8473	179.131
7.47496e+07	1.38889	16.9319	179.118
7.47502e+07	1.39583	17.0166	179.106
7.47508e+07	1.40278	17.1013	179.093
7.47514e+07	1.40972	17.1859	179.081
7.4752e+07	1.41667	17.2706	179.068
7.47526e+07	1.42361	17.3552	179.055
7.47532e+07	1.43056	17.4399	179.043
7.47538e+07	1.4375	17.5246	179.03
7.47544e+07	1.44444	17.6092	179.018
7.4755e+07	1.45139	17.6939	179.005
7.47556e+07	1.45833	17.7785	178.993
7.47562e+07	1.46528	17.8632	178.98
7.47568e+07	1.47222	17.9478	178.968
7.47574e+07	1.47917	18.0325	178.955
7.4758e+07	1.48611	18.1172	178.941
7.47586e+07	1.49306	18.2018	178.926
7.47592e+07	1.5	18.2865	178.909
7.47598e+07	1.50694	18.3711	178.89
7.47604e+07	1.51389	18.4558	178.871
7.4761e+07	1.52083	18.5405	178.851
7.47616e+07	1.52778	18.6251	178.829
7.47622e+07	1.53472	18.7098	178.806
7.47628e+07	1.54167	18.7944	178.783
7.47634e+07	1.54861	18.8791	178.759
7.4764e+07	1.55556	18.9638	178.733
7.47646e+07	1.5625	19.0484	178.708
7.47652e+07	1.56944	19.1331	178.681
7.47658e+07	1.57639	19.2177	178.654
7.47664e+07	1.58333	19.3024	178.626
7.4767e+07	1.59028	19.3871	178.598
7.47676e+07	1.59722	19.4717	178.569
7.47682e+07	1.60417	19.5564	178.54
7.47688e+07	1.61111	19.641	178.511
7.47694e+07	1.61806	19.7257	178.48
7.477e+07	1.625	19.8104	178.45
7.47706e+07	1.63194	19.895	178.419
7.47712e+07	1.63889	19.9797	178.388
7.47718e+07	1.64583	20.0643	178.357
7.47724e+07	1.65278	20.149	178.325
7.4773e+07	1.65972	20.2337	178.293
7.47736e+07	1.66667	20.3183	178.261
7.47742e+07	1.67361	20.403	178.228
7.47748e+07	1.68056	20.4876	178.196
7.47754e+07	1.6875	20.5723	178.163
7.4776e+07	1.69444	20.657	178.13
7.47766e+07	1.70139	20.7416	178.097
7.47772e+07	1.70833	20.8263	178.063
7.47778e+07	1.71528	20.9109	178.03
7.47784e+07	1.72222	20.9956	177.996
7.4779e+07	1.72917	21.0803	177.962
7.47796e+07	1.73611	21.1649	177.928
7.47802e+07	1.74306	21.2496	177.894
7.47808e+07	1.75	21.3342	177.86
7.47814e+07	1.75694	21.4189	177.826
7.4782e+07	1.76389	21.5036	177.792
7.47826e+07	1.77083	21.5882	177.757
7.47832e+07	1.77778	21.6729	177.722
7.47838e+07	1.78472	21.7575	177.688
7.47844e+07	1.79167	21.8422	177.653
7.4785e+07	1.79861	21.9269	177.618
7.47856e+07	1.80556	22.0115	177.583
7.47862e+07	1.8125	22.0962	177.549
7.47868e+07	1.81944	22.1808	177.513
7.47874e+07	1.82639	22.2655	177.478
7.4788e+07	1.83333	22.3502	177.443
7.47886e+07	1.84028	22.4348	177.408
7.47892e+07	1.84722	22.5195	177.373
7.47898e+07	1.85417	22.6041	177.338
7.47904e+07	1.86111	22.6888	177.302
7.4791e+07	1.86806	22.7735	177.267
7.47916e+07	1.875	22.8581	177.231
7.47922e+07	1.88194	22.9428	177.196
7.47928e+07	1.88889	23.0274	177.16
7.47934e+07	1.89583	23.1121	177.125
7.4794e+07	1.90278	23.1967	177.089
7.47946e+07	1.90972	23.2814	177.054
7.47952e+07	1.91667	23.3661	177.018
7.47958e+07	1.92361	23.4507	176.982
7.47964e+07	1.93056	23.5354	176.947
7.4797e+07	1.9375	23.62	176.911
7.47976e+07	1.94444	23.7047	176.875
7.47982e+07	1.95139	23.7894	176.839
7.47988e+07	1.95833	23.874	176.803
7.47994e+07	1.96528	23.9587	176.767
7.48e+07	1.97222	24.0433	176.731
7.48006e+07	1.97917	24.128	176.696
7.48012e+07	1.98611	24.2127	176.66
7.48018e+07	1.99306	24.2973	176.624
7.48024e+07	2	24.382	176.587
7.4803e+07	2.00694	24.4666	176.551
7.48036e+07	2.01389	24.5513	176.515
7.48042e+07	2.02083	24.636	176.479
7.48048e+07	2.02778	24.7206	176.443
7.48054e+07	2.03472	24.8053	176.407
7.4806e+07	2.04167	24.8899	176.371
7.48066e+07	2.04861	24.9746	176.334
7.48072e+07	2.05556	25.0593	176.298
7.48078e+07	2.0625	25.1439	176.262
7.48084e+07	2.06944	25.2286	176.226
7.4809e+07	2.07639	25.3132	176.189
7.48096e+07	2.08333	25.3979	176.153
7.48102e+07	2.09028	25.4826	176.116
7.48108e+07	2.09722	25.5672	176.08
7.48114e+07	2.10417	25.6519	176.044
7.4812e+07	2.11111	25.7365	176.007
7.48126e+07	2.11806	25.8212	175.971
7.48132e+07	2.125	25.9059	175.934
7.48138e+07	2.13194	25.9905	175.898
7.48144e+07	2.13889	26.0752	175.861
7.4815e+07	2.14583	26.1598	175.824
7.48156e+07	2.15278	26.2445	175.788
7.48162e+07	2.15972	26.3292	175.751
7.48168e+07	2.16667	26.4138	175.715
7.48174e+07	2.17361	26.4985	175.678
7.4818e+07	2.18056	26.5831	175.641
7.48186e+07	2.1875	26.6678	175.605
7.48192e+07	2.19444	26.7525	175.568
7.48198e+07	2.20139	26.8371	175.531
7.48204e+07	2.20833	26.9218	175.494
7.4821e+07	2.21528	27.0064	175.457
7.48216e+07	2.22222	27.0911	175.421
7.48222e+07	2.22917	27.1758	175.384
7.48228e+07	2.23611	27.2604	175.347
7.48234e+07	2.24306	27.3451	175.31
7.4824e+07	2.25	27.4297	175.273
7.48246e+07	2.25694	27.5144	175.236
7.48252e+07	2.26389	27.5991	175.199
7.48258e+07	2.27083	27.6837	175.162
7.48264e+07	2.27778	27.7684	175.125
7.4827e+07	2.28472	27.853	175.088
7.48276e+07	2.29167	27.9377	175.051
7.48282e+07	2.29861	28.0224	175.014
7.48288e+07	2.30556	28.107	174.977
7.48294e+07	2.3125	28.1917	174.939
7.483e+07	2.31944	28.2763	174.902
7.48306e+07	2.32639	28.361	174.865
7.48312e+07	2.33333	28.4456	174.828
7.48318e+07	2.34028	28.5303	174.791
7.48324e+07	2.34722	28.615	174.753
7.4833e+07	2.35417	28.6996	174.716
7.48336e+07	2.36111	28.7843	174.679
7.48342e+07	2.36806	28.8689	174.641
7.48348e+07	2.375	28.9536	174.604
7.48354e+07	2.38194	29.0383	174.567
7.4836e+07	2.38889	29.1229	174.529
7.48366e+07	2.39583	29.2076	174.492
7.48372e+07	2.40278	29.2922	174.454
7.48378e+07	2.40972	29.3769	174.417
7.48384e+07	2.41667	29.4616	174.379
7.4839e+07	2.42361	29.5462	174.342
7.48396e+07	2.43056	29.6309	174.304
7.48402e+07	2.4375	29.7155	174.267
7.48408e+07	2.44444	29.8002	174.229
7.48414e+07	2.45139	29.8849	174.192
7.4842e+07	2.45833	29.9695	174.154
7.48426e+07	2.46528	30.0542	174.116
7.48432e+07	2.47222	30.1388	174.079
7.48438e+07	2.47917	30.2235	174.041
7.48444e+07	2.48611	30.3082	174.003
7.4845e+07	2.49306	30.3928	173.965
7.48456e+07	2.5	30.4775	173.928
7.48462e+07	2.50694	30.5621	173.89
7.48468e+07	2.51389	30.6468	173.852
7.48474e+07	2.52083	30.7315	173.814
7.4848e+07	2.52778	30.8161	173.776
7.48486e+07	2.53472	30.9008	173.738
7.48492e+07	2.54167	30.9854	173.7
7.48498e+07	2.54861	31.0701	173.662
7.48504e+07	2.55556	31.1548	173.624
7.4851e+07	2.5625	31.2394	173.586
7.48516e+07	2.56944	31.3241	173.548
7.48522e+07	2.57639	31.4087	173.51
7.48528e+07	2.58333	31.4934	173.472
7.48534e+07	2.59028	31.5781	173.434
7.4854e+07	2.59722	31.6627	173.396
7.48546e+07	2.60417	31.7474	173.358
7.48552e+07	2.61111	31.832	173.32
7.48558e+07	2.61806	31.9167	173.282
7.48564e+07	2.625	32.0014	173.243
7.4857e+07	2.63194	32.086	173.205
7.48576e+07	2.63889	32.1707	173.167
7.48582e+07	2.64583	32.2553	173.128
7.48588e+07	2.65278	32.34	173.09
7.48594e+07	2.65972	32.4247	173.052
7.486e+07	2.66667	32.5093	173.013
7.48606e+07	2.67361	32.594	172.975
7.48612e+07	2.68056	32.6786	172.937
7.48618e+07	2.6875	32.7633	172.898
7.48624e+07	2.69444	32.848	172.86
7.4863e+07	2.70139	32.9326	172.821
7.48636e+07	2.70833	33.0173	172.783
7.48642e+07	2.71528	33.1019	172.744
7.48648e+07	2.72222	33.1866	172.705
7.48654e+07	2.72917	33.2712	172.667
7.4866e+07	2.73611	33.3559	172.628
7.48666e+07	2.74306	33.4406	172.59
7.48672e+07	2.75	33.5252	172.551
7.48678e+07	2.75694	33.6099	172.512
7.48684e+07	2.76389	33.6945	172.474
7.4869e+07	2.77083	33.7792	172.435
7.48696e+07	2.77778	33.8639	172.396
7.48702e+07	2.78472	33.9485	172.357
7.48708e+07	2.79167	34.0332	172.318
7.48714e+07	2.79861	34.1178	172.279
7.4872e+07	2.80556	34.2025	172.241
7.48726e+07	2.8125	34.2872	172.202
7.48732e+07	2.81944	34.3718	172.163
7.48738e+07	2.82639	34.4565	172.124
7.48744e+07	2.83333	34.5411	172.085
7.4875e+07	2.84028	34.6258	172.046
7.48756e+07	2.84722	34.7105	172.007
7.48762e+07	2.85417	34.7951	171.968
7.48768e+07	2.86111	34.8798	171.929
7.48774e+07	2.86806	34.9644	171.89
7.4878e+07	2.875	35.0491	171.85
7.48786e+07	2.88194	35.1338	171.811
7.48792e+07	2.88889	35.2184	171.772
7.48798e+07	2.89583	35.3031	171.733
7.48804e+07	2.90278	35.3877	171.694
7.4881e+07	2.90972	35.4724	171.654
7.48816e+07	2.91667	35.5571	171.615
7.48822e+07	2.92361	35.6417	171.576
7.48828e+07	2.93056	35.7264	171.536
7.48834e+07	2.9375	35.811	171.497
7.4884e+07	2.94444	35.8957	171.458
7.48846e+07	2.95139	35.9804	171.418
7.48852e+07	2.95833	36.065	171.378
7.48858e+07	2.96528	36.1497	171.337
7.48864e+07	2.97222	36.2343	171.295
7.4887e+07	2.97917	36.319	171.252
7.48876e+07	2.98611	36.4037	171.208
7.48882e+07	2.99306	36.4883	171.162
7.48888e+07	3	36.573	171.116
7.48894e+07	3.00694	36.6576	171.069
7.489e+07	3.01389	36.7423	171.022
7.48906e+07	3.02083	36.827	170.973
7.48912e+07	3.02778	36.9116	170.924
7.48918e+07	3.03472	36.9963	170.874
7.48924e+07	3.04167	37.0809	170.824
7.4893e+07	3.04861	37.1656	170.773
7.48936e+07	3.05556	37.2503	170.721
7.48942e+07	3.0625	37.3349	170.669
7.48948e+07	3.06944	37.4196	170.616
7.48954e+07	3.07639	37.5042	170.563
7.4896e+07	3.08333	37.5889	170.51
7.48966e+07	3.09028	37.6736	170.456
7.48972e+07	3.09722	37.7582	170.402
7.48978e+07	3.10417	37.8429	170.347
7.48984e+07	3.11111	37.9275	170.292
7.4899e+07	3.11806	38.0122	170.237
7.48996e+07	3.125	38.0969	170.181
7.49002e+07	3.13194	38.1815	170.125
7.49008e+07	3.13889	38.2662	170.069
7.49014e+07	3.14583	38.3508	170.012
7.4902e+07	3.15278	38.4355	169.956
7.49026e+07	3.15972	38.5201	169.899
7.49032e+07	3.16667	38.6048	169.841
7.49038e+07	3.17361	38.6895	169.784
7.49044e+07	3.18056	38.7741	169.726
7.4905e+07	3.1875	38.8588	169.669
7.49056e+07	3.19444	38.9434	169.611
7.49062e+07	3.20139	39.0281	169.552
7.49068e+07	3.20833	39.1128	169.494
7.49074e+07	3.21528	39.1974	169.435
7.4908e+07	3.22222	39.2821	169.377
7.49086e+07	3.22917	39.3667	169.318
7.49092e+07	3.23611	39.4514	169.259
7.49098e+07	3.24306	39.5361	169.2
7.49104e+07	3.25	39.6207	169.14
7.4911e+07	3.25694	39.7054	169.081
7.49116e+07	3.26389	39.79	169.022
7.49122e+07	3.27083	39.8747	168.962
7.49128e+07	3.27778	39.9594	168.902
7.49134e+07	3.28472	40.044	168.842
7.4914e+07	3.29167	40.1287	168.782
7.49146e+07	3.29861	40.2133	168.722
7.49152e+07	3.30556	40.298	168.662
7.49158e+07	3.3125	40.3827	168.601
7.49164e+07	3.31944	40.4673	168.541
7.4917e+07	3.32639	40.552	168.48
7.49176e+07	3.33333	40.6366	168.42
7.49182e+07	3.34028	40.7213	168.359
7.49188e+07	3.34722	40.806	168.298
7.49194e+07	3.35417	40.8906	168.237
7.492e+07	3.36111	40.9753	168.176
7.49206e+07	3.36806	41.0599	168.115
7.49212e+07	3.375	41.1446	168.054
7.49218e+07	3.38194	41.2293	167.993
7.49224e+07	3.38889	41.3139	167.931
7.4923e+07	3.39583	41.3986	167.87
7.49236e+07	3.40278	41.4832	167.808
7.49242e+07	3.40972	41.5679	167.747
7.49248e+07	3.41667	41.6526	167.685
7.49254e+07	3.42361	41.7372	167.623
7.4926e+07	3.43056	41.8219	167.562
7.49266e+07	3.4375	41.9065	167.5
7.49272e+07	3.44444	41.9912	167.438
7.49278e+07	3.45139	42.0759	167.376
7.49284e+07	3.45833	42.1605	167.313
7.4929e+07	3.46528	42.2452	167.251
7.49296e+07	3.47222	42.3298	167.189
7.49302e+07	3.47917	42.4145	167.127
7.49308e+07	3.48611	42.4992	167.064
7.49314e+07	3.49306	42.5838	167.002
7.4932e+07	3.5	42.6685	166.939
7.49326e+07	3.50694	42.7531	166.876
7.49332e+07	3.51389	42.8378	166.814
7.49338e+07	3.52083	42.9225	166.751
7.49344e+07	3.52778	43.0071	166.688
7.4935e+07	3.53472	43.0918	166.625
7.49356e+07	3.54167	43.1764	166.562
7.49362e+07	3.54861	43.2611	166.499
7.49368e+07	3.55556	43.3458	166.436
7.49374e+07	3.5625	43.4304	166.372
7.4938e+07	3.56944	43.5151	166.309
7.49386e+07	3.57639	43.5997	166.246
7.49392e+07	3.58333	43.6844	166.182
7.49398e+07	3.59028	43.769	166.119
7.49404e+07	3.59722	43.8537	166.055
7.4941e+07	3.60417	43.9384	165.991
7.49416e+07	3.61111	44.023	165.928
7.49422e+07	3.61806	44.1077	165.864
7.49428e+07	3.625	44.1923	165.8
7.49434e+07	3.63194	44.277	165.736
7.4944e+07	3.63889	44.3617	165.672
7.49446e+07	3.64583	44.4463	165.608
7.49452e+07	3.65278	44.531	165.544
7.49458e+07	3.65972	44.6156	165.479
7.49464e+07	3.66667	44.7003	165.415
7.4947e+07	3.67361	44.785	165.351
7.49476e+07	3.68056	44.8696	165.286
7.49482e+07	3.6875	44.9543	165.222
7.49488e+07	3.69444	45.0389	165.157
7.49494e+07	3.70139	45.1236	165.092
7.495e+07	3.70833	45.2083	165.028
7.49506e+07	3.71528	45.2929	164.963
7.49512e+07	3.72222	45.3776	164.898
7.49518e+07	3.72917	45.4622	164.833
7.49524e+07	3.73611	45.5469	164.768
7.4953e+07	3.74306	45.6316	164.703
7.49536e+07	3.75	45.7162	164.638
7.49542e+07	3.75694	45.8009	164.572
7.49548e+07	3.76389	45.8855	164.507
7.49554e+07	3.77083	45.9702	164.442
7.4956e+07	3.77778	46.0549	164.376
7.49566e+07	3.78472	46.1395	164.311
7.49572e+07	3.79167	46.2242	164.245
7.49578e+07	3.79861	46.3088	164.179
7.49584e+07	3.80556	46.3935	164.114
7.4959e+07	3.8125	46.4782	164.048
7.49596e+07	3.81944	46.5628	163.982
7.49602e+07	3.82639	46.6475	163.916
7.49608e+07	3.83333	46.7321	163.85
7.49614e+07	3.84028	46.8168	163.784
7.4962e+07	3.84722	46.9015	163.717
7.49626e+07	3.85417	46.9861	163.651
7.49632e+07	3.86111	47.0708	163.585
7.49638e+07	3.86806	47.1554	163.518
7.49644e+07	3.875	47.2401	163.452
7.4965e+07	3.88194	47.3248	163.385
7.49656e+07	3.88889	47.4094	163.319
7.49662e+07	3.89583	47.4941	163.252
7.49668e+07	3.90278	47.5787	163.185
7.49674e+07	3.90972	47.6634	163.118
7.4968e+07	3.91667	47.7481	163.051
7.49686e+07	3.92361	47.8327	162.984
7.49692e+07	3.93056	47.9174	162.917
7.49698e+07	3.9375	48.002	162.85
7.49704e+07	3.94444	48.0867	162.783
7.4971e+07	3.95139	48.1714	162.715
7.49716e+07	3.95833	48.256	162.648
7.49722e+07	3.96528	48.3407	162.58
7.49728e+07	3.97222	48.4253	162.513
7.49734e+07	3.97917	48.51	162.445
7.4974e+07	3.98611	48.5946	162.377
7.49746e+07	3.99306	48.6793	162.309
7.49752e+07	4	48.764	162.242
7.49758e+07	4.00694	48.8486	162.174
7.49764e+07	4.01389	48.9333	162.106
7.4977e+07	4.02083	49.0179	162.037
7.49776e+07	4.02778	49.1026	161.969
7.49782e+07	4.03472	49.1873	161.901
7.49788e+07	4.04167	49.2719	161.833
7.49794e+07	4.04861	49.3566	161.764
7.498e+07	4.05556	49.4412	161.696
7.49806e+07	4.0625	49.5259	161.627
7.49812e+07	4.06944	49.6106	161.558
7.49818e+07	4.07639	49.6952	161.489
7.49824e+07	4.08333	49.7799	161.421
7.4983e+07	4.09028	49.8645	161.352
7.49836e+07	4.09722	49.9492	161.283
7.49842e+07	4.10417	50.0339	161.214
7.49848e+07	4.11111	50.1185	161.144
7.49854e+07	4.11806	50.2032	161.075
7.4986e+07	4.125	50.2878	161.006
7.49866e+07	4.13194	50.3725	160.936
7.49872e+07	4.13889	50.4572	160.867
7.49878e+07	4.14583	50.5418	160.797
7.49884e+07	4.15278	50.6265	160.728
7.4989e+07	4.15972	50.7111	160.658
7.49896e+07	4.16667	50.7958	160.588
7.49902e+07	4.17361	50.8805	160.518
7.49908e+07	4.18056	50.9651	160.448
7.49914e+07	4.1875	51.0498	160.378
7.4992e+07	4.19444	51.1344	160.308
7.49926e+07	4.20139	51.2191	160.237
7.49932e+07	4.20833	51.3038	160.167
7.49938e+07	4.21528	51.3884	160.097
7.49944e+07	4.22222	51.4731	160.026
7.4995e+07	4.22917	51.5577	159.956
7.49956e+07	4.23611	51.6424	159.885
7.49962e+07	4.24306	51.7271	159.814
7.49968e+07	4.25	51.8117	159.743
7.49974e+07	4.25694	51.8964	159.672
7.4998e+07	4.26389	51.981	159.601
7.49986e+07	4.27083	52.0657	159.53
7.49992e+07	4.27778	52.1504	159.459
7.49998e+07	4.28472	52.235	159.388
7.50004e+07	4.29167	52.3197	159.316
7.5001e+07	4.29861	52.4043	159.245
7.50016e+07	4.30556	52.489	159.173
7.50022e+07	4.3125	52.5737	159.101
7.50028e+07	4.31944	52.6583	159.03
7.50034e+07	4.32639	52.743	158.958
7.5004e+07	4.33333	52.8276	158.886
7.50046e+07	4.34028	52.9123	158.814
7.50052e+07	4.34722	52.997	158.742
7.50058e+07	4.35417	53.0816	158.67
7.50064e+07	4.36111	53.1663	158.597
7.5007e+07	4.36806	53.2509	158.525
7.50076e+07	4.375	53.3356	158.453
7.50082e+07	4.38194	53.4203	158.38
7.50088e+07	4.38889	53.5049	158.307
7.50094e+07	4.39583	53.5896	158.235
7.501e+07	4.40278	53.6742	158.162
7.50106e+07	4.40972	53.7589	158.089
7.50112e+07	4.41667	53.8435	158.016
7.50118e+07	4.42361	53.9282	157.943
7.50124e+07	4.43056	54.0129	157.87
7.5013e+07	4.4375	54.0975	157.796
7.50136e+07	4.44444	54.1822	157.722
7.50142e+07	4.45139	54.2668	157.647
7.50148e+07	4.45833	54.3515	157.571
7.50154e+07	4.46528	54.4362	157.495
7.5016e+07	4.47222	54.5208	157.419
7.50166e+07	4.47917	54.6055	157.342
7.50172e+07	4.48611	54.6901	157.264
7.50178e+07	4.49306	54.7748	157.186
7.50184e+07	4.5	54.8595	157.107
7.5019e+07	4.50694	54.9441	157.028
7.50196e+07	4.51389	55.0288	156.949
7.50202e+07	4.52083	55.1134	156.869
7.50208e+07	4.52778	55.1981	156.789
7.50214e+07	4.53472	55.2828	156.708
7.5022e+07	4.54167	55.3674	156.627
7.50226e+07	4.54861	55.4521	156.546
7.50232e+07	4.55556	55.5367	156.464
7.50238e+07	4.5625	55.6214	156.382
7.50244e+07	4.56944	55.7061	156.3
7.5025e+07	4.57639	55.7907	156.217
7.50256e+07	4.58333	55.8754	156.134
7.50262e+07	4.59028	55.96	156.051
7.50268e+07	4.59722	56.0447	155.968
7.50274e+07	4.60417	56.1294	155.884
7.5028e+07	4.61111	56.214	155.8
7.50286e+07	4.61806	56.2987	155.715
7.50292e+07	4.625	56.3833	155.631
7.50298e+07	4.63194	56.468	155.546
7.50304e+07	4.63889	56.5527	155.461
7.5031e+07	4.64583	56.6373	155.376
7.50316e+07	4.65278	56.722	155.29
7.50322e+07	4.65972	56.8066	155.204
7.50328e+07	4.66667	56.8913	155.118
7.50334e+07	4.67361	56.976	155.032
7.5034e+07	4.68056	57.0606	154.945
7.50346e+07	4.6875	57.1453	154.859
7.50352e+07	4.69444	57.2299	154.772
7.50358e+07	4.70139	57.3146	154.685
7.50364e+07	4.70833	57.3993	154.597
7.5037e+07	4.71528	57.4839	154.51
7.50376e+07	4.72222	57.5686	154.422
7.50382e+07	4.72917	57.6532	154.334
7.50388e+07	4.73611	57.7379	154.246
7.50394e+07	4.74306	57.8226	154.158
7.504e+07	4.75	57.9072	154.069
7.50406e+07	4.75694	57.9919	153.981
7.50412e+07	4.76389	58.0765	153.892
7.50418e+07	4.77083	58.1612	153.803
7.50424e+07	4.77778	58.2459	153.714
7.5043e+07	4.78472	58.3305	153.624
7.50436e+07	4.79167	58.4152	153.535
7.50442e+07	4.79861	58.4998	153.445
7.50448e+07	4.80556	58.5845	153.355
7.50454e+07	4.8125	58.6692	153.265
7.5046e+07	4.81944	58.7538	153.175
7.50466e+07	4.82639	58.8385	153.084
7.50472e+07	4.83333	58.9231	152.994
7.50478e+07	4.84028	59.0078	152.903
7.50484e+07	4.84722	59.0924	152.812
7.5049e+07	4.85417	59.1771	152.721
7.50496e+07	4.86111	59.2618	152.63
7.50502e+07	4.86806	59.3464	152.538
7.50508e+07	4.875	59.4311	152.447
7.50514e+07	4.88194	59.5157	152.355
7.5052e+07	4.88889	59.6004	152.263
7.50526e+07	4.89583	59.6851	152.171
7.50532e+07	4.90278	59.7697	152.079
7.50538e+07	4.90972	59.8544	151.986
7.50544e+07	4.91667	59.939	151.894
7.5055e+07	4.92361	60.0237	151.801
7.50556e+07	4.93056	60.1084	151.708
7.50562e+07	4.9375	60.193	151.615
7.50568e+07	4.94444	60.2777	151.522
7.50574e+07	4.95139	60.3623	151.428
7.5058e+07	4.95833	60.447	151.335
7.50586e+07	4.96528	60.5317	151.241
7.50592e+07	4.97222	60.6163	151.147
7.50598e+07	4.97917	60.701	151.053
7.50604e+07	4.98611	60.7856	150.959
7.5061e+07	4.99306	60.8703	150.864
7.50616e+07	5	60.955	150.77
7.50622e+07	5.00694	61.0396	150.675
7.50628e+07	5.01389	61.1243	150.58
7.50634e+07	5.02083	61.2089	150.485
7.5064e+07	5.02778	61.2936	150.39
7.50646e+07	5.03472	61.3783	150.295
7.50652e+07	5.04167	61.4629	150.199
7.50658e+07	5.04861	61.5476	150.103
7.50664e+07	5.05556	61.6322	150.007
7.5067e+07	5.0625	61.7169	149.911
7.50676e+07	5.06944	61.8016	149.815
7.50682e+07	5.07639	61.8862	149.719
7.50688e+07	5.08333	61.9709	149.622
7.50694e+07	5.09028	62.0555	149.525
7.507e+07	5.09722	62.1402	149.429
7.50706e+07	5.10417	62.2249	149.332
7.50712e+07	5.11111	62.3095	149.234
7.50718e+07	5.11806	62.3942	149.137
7.50724e+07	5.125	62.4788	149.039
7.5073e+07	5.13194	62.5635	148.942
7.50736e+07	5.13889	62.6482	148.844
7.50742e+07	5.14583	62.7328	148.746
7.50748e+07	5.15278	62.8175	148.647
7.50754e+07	5.15972	62.9021	148.549
7.5076e+07	5.16667	62.9868	148.45
7.50766e+07	5.17361	63.0715	148.352
7.50772e+07	5.18056	63.1561	148.253
7.50778e+07	5.1875	63.2408	148.153
7.50784e+07	5.19444	63.3254	148.054
7.5079e+07	5.20139	63.4101	147.955
7.50796e+07	5.20833	63.4948	147.855
7.50802e+07	5.21528	63.5794	147.755
7.50808e+07	5.22222	63.6641	147.655
7.50814e+07	5.22917	63.7487	147.555
7.5082e+07	5.23611	63.8334	147.455
7.50826e+07	5.24306	63.918	147.354
7.50832e+07	5.25	64.0027	147.253
7.50838e+07	5.25694	64.0874	147.152
7.50844e+07	5.26389	64.172	147.051
7.5085e+07	5.27083	64.2567	146.95
7.50856e+07	5.27778	64.3413	146.849
7.50862e+07	5.28472	64.426	146.747
7.50868e+07	5.29167	64.5107	146.645
7.50874e+07	5.29861	64.5953	146.543
7.5088e+07	5.30556	64.68	146.441
7.50886e+07	5.3125	64.7646	146.339
7.50892e+07	5.31944	64.8493	146.236
7.50898e+07	5.32639	64.934	146.133
7.50904e+07	5.33333	65.0186	146.03
7.5091e+07	5.34028	65.1033	145.927
7.50916e+07	5.34722	65.1879	145.824
7.50922e+07	5.35417	65.2726	145.72
7.50928e+07	5.36111	65.3573	145.617
7.50934e+07	5.36806	65.4419	145.513
7.5094e+07	5.375	65.5266	145.409
7.50946e+07	5.38194	65.6112	145.305
7.50952e+07	5.38889	65.6959	145.2
7.50958e+07	5.39583	65.7806	145.095
7.50964e+07	5.40278	65.8652	144.991
7.5097e+07	5.40972	65.9499	144.886
7.50976e+07	5.41667	66.0345	144.78
7.50982e+07	5.42361	66.1192	144.675
7.50988e+07	5.43056	66.2039	144.569
7.50994e+07	5.4375	66.2885	144.463
7.51e+07	5.44444	66.3732	144.357
7.51006e+07	5.45139	66.4578	144.251
7.51012e+07	5.45833	66.5425	144.145
7.51018e+07	5.46528	66.6272	144.038
7.51024e+07	5.47222	66.7118	143.931
7.5103e+07	5.47917	66.7965	143.824
7.51036e+07	5.48611	66.8811	143.717
7.51042e+07	5.49306	66.9658	143.609
7.51048e+07	5.5	67.0505	143.502
7.51054e+07	5.50694	67.1351	143.394
7.5106e+07	5.51389	67.2198	143.286
7.51066e+07	5.52083	67.3044	143.177
7.51072e+07	5.52778	67.3891	143.069
7.51078e+07	5.53472	67.4738	142.96
7.51084e+07	5.54167	67.5584	142.851
7.5109e+07	5.54861	67.6431	142.742
7.51096e+07	5.55556	67.7277	142.633
7.51102e+07	5.5625	67.8124	142.523
7.51108e+07	5.56944	67.8971	142.414
7.51114e+07	5.57639	67.9817	142.304
7.5112e+07	5.58333	68.0664	142.193
7.51126e+07	5.59028	68.151	142.083
7.51132e+07	5.59722	68.2357	141.972
7.51138e+07	5.60417	68.3204	141.861
7.51144e+07	5.61111	68.405	141.75
7.5115e+07	5.61806	68.4897	141.639
7.51156e+07	5.625	68.5743	141.528
7.51162e+07	5.63194	68.659	141.416
7.51168e+07	5.63889	68.7437	141.304
7.51174e+07	5.64583	68.8283	141.192
7.5118e+07	5.65278	68.913	141.079
7.51186e+07	5.65972	68.9976	140.967
7.51192e+07	5.66667	69.0823	140.854
7.51198e+07	5.67361	69.1669	140.741
7.51204e+07	5.68056	69.2516	140.627
7.5121e+07	5.6875	69.3363	140.514
7.51216e+07	5.69444	69.4209	140.4
7.51222e+07	5.70139	69.5056	140.286
7.51228e+07	5.70833	69.5902	140.172
7.51234e+07	5.71528	69.6749	140.057
7.5124e+07	5.72222	69.7596	139.943
7.51246e+07	5.72917	69.8442	139.828
7.51252e+07	5.73611	69.9289	139.712
7.51258e+07	5.74306	70.0135	139.597
7.51264e+07	5.75	70.0982	139.481
7.5127e+07	5.75694	70.1829	139.365
7.51276e+07	5.76389	70.2675	139.249
7.51282e+07	5.77083	70.3522	139.133
7.51288e+07	5.77778	70.4368	139.016
7.51294e+07	5.78472	70.5215	138.899
7.513e+07	5.79167	70.6062	138.782
7.51306e+07	5.79861	70.6908	138.665
7.51312e+07	5.80556	70.7755	138.547
7.51318e+07	5.8125	70.8601	138.429
7.51324e+07	5.81944	70.9448	138.311
7.5133e+07	5.82639	71.0295	138.193
7.51336e+07	5.83333	71.1141	138.074
7.51342e+07	5.84028	71.1988	137.955
7.51348e+07	5.84722	71.2834	137.836
7.51354e+07	5.85417	71.3681	137.717
7.5136e+07	5.86111	71.4528	137.597
7.51366e+07	5.86806	71.5374	137.477
7.51372e+07	5.875	71.6221	137.357
7.51378e+07	5.88194	71.7067	137.237
7.51384e+07	5.88889	71.7914	137.116
7.5139e+07	5.89583	71.8761	136.995
7.51396e+07	5.90278	71.9607	136.874
7.51402e+07	5.90972	72.0454	136.752
7.51408e+07	5.91667	72.13	136.631
7.51414e+07	5.92361	72.2147	136.509
7.5142e+07	5.93056	72.2994	136.387
7.51426e+07	5.9375	72.384	136.265
7.51432e+07	5.94444	72.4687	136.142
7.51438e+07	5.95139	72.5533	136.019
7.51444e+07	5.95833	72.638	135.897
7.5145e+07	5.96528	72.7227	135.773
7.51456e+07	5.97222	72.8073	135.65
7.51462e+07	5.97917	72.892	135.527
7.51468e+07	5.98611	72.9766	135.403
7.51474e+07	5.99306	73.0613	135.279
7.5148e+07	6	73.146	135.154
7.51486e+07	6.00694	73.2306	135.03
7.51492e+07	6.01389	73.3153	134.905
7.51498e+07	6.02083	73.3999	134.78
7.51504e+07	6.02778	73.4846	134.655
7.5151e+07	6.03472	73.5693	134.53
7.51516e+07	6.04167	73.6539	134.404
7.51522e+07	6.04861	73.7386	134.278
7.51528e+07	6.05556	73.8232	134.152
7.51534e+07	6.0625	73.9079	134.025
7.5154e+07	6.06944	73.9925	133.899
7.51546e+07	6.07639	74.0772	133.772
7.51552e+07	6.08333	74.1619	133.644
7.51558e+07	6.09028	74.2465	133.517
7.51564e+07	6.09722	74.3312	133.389
7.5157e+07	6.10417	74.4158	133.261
7.51576e+07	6.11111	74.5005	133.133
7.51582e+07	6.11806	74.5852	133.004
7.51588e+07	6.125	74.6698	132.875
7.51594e+07	6.13194	74.7545	132.746
7.516e+07	6.13889	74.8391	132.617
7.51606e+07	6.14583	74.9238	132.487
7.51612e+07	6.15278	75.0085	132.357
7.51618e+07	6.15972	75.0931	132.227
7.51624e+07	6.16667	75.1778	132.096
7.5163e+07	6.17361	75.2624	131.965
7.51636e+07	6.18056	75.3471	131.834
7.51642e+07	6.1875	75.4318	131.702
7.51648e+07	6.19444	75.5164	131.571
7.51654e+07	6.20139	75.6011	131.439
7.5166e+07	6.20833	75.6857	131.306
7.51666e+07	6.21528	75.7704	131.174
7.51672e+07	6.22222	75.8551	131.041
7.51678e+07	6.22917	75.9397	130.907
7.51684e+07	6.23611	76.0244	130.774
7.5169e+07	6.24306	76.109	130.64
7.51696e+07	6.25	76.1937	130.506
7.51702e+07	6.25694	76.2784	130.371
7.51708e+07	6.26389	76.363	130.236
7.51714e+07	6.27083	76.4477	130.101
7.5172e+07	6.27778	76.5323	129.966
7.51726e+07	6.28472	76.617	129.83
7.51732e+07	6.29167	76.7017	129.694
7.51738e+07	6.29861	76.7863	129.557
7.51744e+07	6.30556	76.871	129.42
7.5175e+07	6.3125	76.9556	129.283
7.51756e+07	6.31944	77.0403	129.146
7.51762e+07	6.32639	77.125	129.008
7.51768e+07	6.33333	77.2096	128.87
7.51774e+07	6.34028	77.2943	128.731
7.5178e+07	6.34722	77.3789	128.593
7.51786e+07	6.35417	77.4636	128.454
7.51792e+07	6.36111	77.5483	128.314
7.51798e+07	6.36806	77.6329	128.174
7.51804e+07	6.375	77.7176	128.034
7.5181e+07	6.38194	77.8022	127.893
7.51816e+07	6.38889	77.8869	127.753
7.51822e+07	6.39583	77.9716	127.611
7.51828e+07	6.40278	78.0562	127.47
7.51834e+07	6.40972	78.1409	127.328
7.5184e+07	6.41667	78.2255	127.185
7.51846e+07	6.42361	78.3102	127.043
7.51852e+07	6.43056	78.3949	126.9
7.51858e+07	6.4375	78.4795	126.756
7.51864e+07	6.44444	78.5642	126.612
7.5187e+07	6.45139	78.6488	126.468
7.51876e+07	6.45833	78.7335	126.324
7.51882e+07	6.46528	78.8182	126.179
7.51888e+07	6.47222	78.9028	126.034
7.51894e+07	6.47917	78.9875	125.888
7.519e+07	6.48611	79.0721	125.742
7.51906e+07	6.49306	79.1568	125.595
7.51912e+07	6.5	79.2414	125.449
7.51918e+07	6.50694	79.3261	125.301
7.51924e+07	6.51389	79.4108	125.154
7.5193e+07	6.52083	79.4954	125.006
7.51936e+07	6.52778	79.5801	124.857
7.51942e+07	6.53472	79.6647	124.709
7.51948e+07	6.54167	79.7494	124.56
7.51954e+07	6.54861	79.8341	124.41
7.5196e+07	6.55556	79.9187	124.26
7.51966e+07	6.5625	80.0034	124.11
7.51972e+07	6.56944	80.088	123.959
7.51978e+07	6.57639	80.1727	123.808
7.51984e+07	6.58333	80.2574	123.656
7.5199e+07	6.59028	80.342	123.504
7.51996e+07	6.59722	80.4267	123.351
7.52002e+07	6.60417	80.5113	123.199
7.52008e+07	6.61111	80.596	123.045
7.52014e+07	6.61806	80.6807	122.892
7.5202e+07	6.625	80.7653	122.737
7.52026e+07	6.63194	80.85	122.583
7.52032e+07	6.63889	80.9346	122.428
7.52038e+07	6.64583	81.0193	122.272
7.52044e+07	6.65278	81.104	122.116
7.5205e+07	6.65972	81.1886	121.96
7.52056e+07	6.66667	81.2733	121.803
7.52062e+07	6.67361	81.3579	121.646
7.52068e+07	6.68056	81.4426	121.489
7.52074e+07	6.6875	81.5273	121.33
7.5208e+07	6.69444	81.6119	121.172
7.52086e+07	6.70139	81.6966	121.013
7.52092e+07	6.70833	81.7812	120.853
7.52098e+07	6.71528	81.8659	120.694
7.52104e+07	6.72222	81.9506	120.533
7.5211e+07	6.72917	82.0352	120.372
7.52116e+07	6.73611	82.1199	120.211
7.52122e+07	6.74306	82.2045	120.049
7.52128e+07	6.75	82.2892	119.887
7.52134e+07	6.75694	82.3739	119.724
7.5214e+07	6.76389	82.4585	119.561
7.52146e+07	6.77083	82.5432	119.397
7.52152e+07	6.77778	82.6278	119.233
7.52158e+07	6.78472	82.7125	119.068
7.52164e+07	6.79167	82.7972	118.903
7.5217e+07	6.79861	82.8818	118.738
7.52176e+07	6.80556	82.9665	118.572
7.52182e+07	6.8125	83.0511	118.405
7.52188e+07	6.81944	83.1358	118.238
7.52194e+07	6.82639	83.2205	118.07
7.522e+07	6.83333	83.3051	117.902
7.52206e+07	6.84028	83.3898	117.733
7.52212e+07	6.84722	83.4744	117.564
7.52218e+07	6.85417	83.5591	117.394
7.52224e+07	6.86111	83.6438	117.224
7.5223e+07	6.86806	83.7284	117.053
7.52236e+07	6.875	83.8131	116.882
7.52242e+07	6.88194	83.8977	116.71
7.52248e+07	6.88889	83.9824	116.538
7.52254e+07	6.89583	84.0671	116.365
7.5226e+07	6.90278	84.1517	116.192
7.52266e+07	6.90972	84.2364	116.018
7.52272e+07	6.91667	84.321	115.843
7.52278e+07	6.92361	84.4057	115.668
7.52284e+07	6.93056	84.4903	115.493
7.5229e+07	6.9375	84.575	115.317
7.52296e+07	6.94444	84.6597	115.14
7.52302e+07	6.95139	84.7443	114.963
7.52308e+07	6.95833	84.829	114.785
7.52314e+07	6.96528	84.9136	114.607
7.5232e+07	6.97222	84.9983	114.428
7.52326e+07	6.97917	85.083	114.248
7.52332e+07	6.98611	85.1676	114.068
7.52338e+07	6.99306	85.2523	113.887
7.52344e+07	7	85.3369	113.706
7.5235e+07	7.00694	85.4216	113.524
7.52356e+07	7.01389	85.5063	113.342
7.52362e+07	7.02083	85.5909	113.159
7.52368e+07	7.02778	85.6756	112.975
7.52374e+07	7.03472	85.7602	112.791
7.5238e+07	7.04167	85.8449	112.606
7.52386e+07	7.04861	85.9296	112.421
7.52392e+07	7.05556	86.0142	112.234
7.52398e+07	7.0625	86.0989	112.048
7.52404e+07	7.06944	86.1835	111.86
7.5241e+07	7.07639	86.2682	111.672
7.52416e+07	7.08333	86.3529	111.484
7.52422e+07	7.09028	86.4375	111.295
7.52428e+07	7.09722	86.5222	111.105
7.52434e+07	7.10417	86.6068	110.914
7.5244e+07	7.11111	86.6915	110.723
7.52446e+07	7.11806	86.7762	110.531
7.52452e+07	7.125	86.8608	110.339
7.52458e+07	7.13194	86.9455	110.146
7.52464e+07	7.13889	87.0301	109.952
7.5247e+07	7.14583	87.1148	109.758
7.52476e+07	7.15278	87.1995	109.563
7.52482e+07	7.15972	87.2841	109.367
7.52488e+07	7.16667	87.3688	109.17
7.52494e+07	7.17361	87.4534	108.973
7.525e+07	7.18056	87.5381	108.775
7.52506e+07	7.1875	87.6228	108.577
7.52512e+07	7.19444	87.7074	108.378
7.52518e+07	7.20139	87.7921	108.178
7.52524e+07	7.20833	87.8767	107.977
7.5253e+07	7.21528	87.9614	107.776
7.52536e+07	7.22222	88.0461	107.574
7.52542e+07	7.22917	88.1307	107.371
7.52548e+07	7.23611	88.2154	107.167
7.52554e+07	7.24306	88.3	106.963
7.5256e+07	7.25	88.3847	106.758
7.52566e+07	7.25694	88.4694	106.553
7.52572e+07	7.26389	88.554	106.346
7.52578e+07	7.27083	88.6387	106.139
7.52584e+07	7.27778	88.7233	105.931
7.5259e+07	7.28472	88.808	105.722
7.52596e+07	7.29167	88.8927	105.513
7.52602e+07	7.29861	88.9773	105.303
7.52608e+07	7.30556	89.062	105.092
7.52614e+07	7.3125	89.1466	104.88
7.5262e+07	7.31944	89.2313	104.667
7.52626e+07	7.32639	89.3159	104.454
7.52632e+07	7.33333	89.4006	104.24
7.52638e+07	7.34028	89.4853	104.025
7.52644e+07	7.34722	89.5699	103.809
7.5265e+07	7.35417	89.6546	103.592
7.52656e+07	7.36111	89.7392	103.375
7.52662e+07	7.36806	89.8239	103.157
7.52668e+07	7.375	89.9086	102.938
7.52674e+07	7.38194	89.9932	102.718
7.5268e+07	7.38889	90.0779	102.499
7.52686e+07	7.39583	90.1625	102.283
7.52692e+07	7.40278	90.2472	102.071
7.52698e+07	7.40972	90.3319	101.863
7.52704e+07	7.41667	90.4165	101.657
7.5271e+07	7.42361	90.5012	101.455
7.52716e+07	7.43056	90.5858	101.256
7.52722e+07	7.4375	90.6705	101.06
7.52728e+07	7.44444	90.7552	100.868
7.52734e+07	7.45139	90.8398	100.678
7.5274e+07	7.45833	90.9245	100.491
7.52746e+07	7.46528	91.0091	100.307
7.52752e+07	7.47222	91.0938	100.126
7.52758e+07	7.47917	91.1785	99.9471
7.52764e+07	7.48611	91.2631	99.7713
7.5277e+07	7.49306	91.3478	99.5982
7.52776e+07	7.5	91.4324	99.4276
7.52782e+07	7.50694	91.5171	99.2596
7.52788e+07	7.51389	91.6018	99.094
7.52794e+07	7.52083	91.6864	98.9309
7.528e+07	7.52778	91.7711	98.7702
7.52806e+07	7.53472	91.8557	98.6119
7.52812e+07	7.54167	91.9404	98.4558
7.52818e+07	7.54861	92.0251	98.3021
7.52824e+07	7.55556	92.1097	98.1505
7.5283e+07	7.5625	92.1944	98.0011
7.52836e+07	7.56944	92.279	97.8538
7.52842e+07	7.57639	92.3637	97.7087
7.52848e+07	7.58333	92.4484	97.5656
7.52854e+07	7.59028	92.533	97.4245
7.5286e+07	7.59722	92.6177	97.2854
7.52866e+07	7.60417	92.7023	97.1483
7.52872e+07	7.61111	92.787	97.013
7.52878e+07	7.61806	92.8717	96.8797
7.52884e+07	7.625	92.9563	96.7482
7.5289e+07	7.63194	93.041	96.6185
7.52896e+07	7.63889	93.1256	96.4906
7.52902e+07	7.64583	93.2103	96.3645
7.52908e+07	7.65278	93.295	96.24
7.52914e+07	7.65972	93.3796	96.1173
7.5292e+07	7.66667	93.4643	95.9962
7.52926e+07	7.67361	93.5489	95.8768
7.52932e+07	7.68056	93.6336	95.759
7.52938e+07	7.6875	93.7183	95.6427
7.52944e+07	7.69444	93.8029	95.528
7.5295e+07	7.70139	93.8876	95.4148
7.52956e+07	7.70833	93.9722	95.3032
7.52962e+07	7.71528	94.0569	95.193
7.52968e+07	7.72222	94.1416	95.0842
7.52974e+07	7.72917	94.2262	94.9769
7.5298e+07	7.73611	94.3109	94.871
7.52986e+07	7.74306	94.3955	94.7665
7.52992e+07	7.75	94.4802	94.6633
7.52998e+07	7.75694	94.5648	94.5615
7.53004e+07	7.76389	94.6495	94.4609
7.5301e+07	7.77083	94.7342	94.3617
7.53016e+07	7.77778	94.8188	94.2638
7.53022e+07	7.78472	94.9035	94.1671
7.53028e+07	7.79167	94.9881	94.0716
7.53034e+07	7.79861	95.0728	93.9773
7.5304e+07	7.80556	95.1575	93.8843
7.53046e+07	7.8125	95.2421	93.7924
7.53052e+07	7.81944	95.3268	93.7017
7.53058e+07	7.82639	95.4114	93.6121
7.53064e+07	7.83333	95.4961	93.5236
7.5307e+07	7.84028	95.5808	93.4362
7.53076e+07	7.84722	95.6654	93.35
7.53082e+07	7.85417	95.7501	93.2648
7.53088e+07	7.86111	95.8347	93.1806
7.53094e+07	7.86806	95.9194	93.0975
7.531e+07	7.875	96.0041	93.0154
7.53106e+07	7.88194	96.0887	92.9343
7.53112e+07	7.88889	96.1734	92.8542
7.53118e+07	7.89583	96.258	92.7751
7.53124e+07	7.90278	96.3427	92.6969
7.5313e+07	7.90972	96.4274	92.6197
7.53136e+07	7.91667	96.512	92.5435
7.53142e+07	7.92361	96.5967	92.4681
7.53148e+07	7.93056	96.6813	92.3936
7.53154e+07	7.9375	96.766	92.3201
7.5316e+07	7.94444	96.8507	92.2474
7.53166e+07	7.95139	96.9353	92.1756
7.53172e+07	7.95833	97.02	92.1046
7.53178e+07	7.96528	97.1046	92.0345
7.53184e+07	7.97222	97.1893	91.9652
7.5319e+07	7.97917	97.274	91.8968
7.53196e+07	7.98611	97.3586	91.8291
7.53202e+07	7.99306	97.4433	91.7622
7.53208e+07	8	97.5279	91.6962
7.53214e+07	8.00694	97.6126	91.6308
7.5322e+07	8.01389	97.6973	91.5663
7.53226e+07	8.02083	97.7819	91.5025
7.53232e+07	8.02778	97.8666	91.4394
7.53238e+07	8.03472	97.9512	91.3771
7.53244e+07	8.04167	98.0359	91.3154
7.5325e+07	8.04861	98.1206	91.2545
7.53256e+07	8.05556	98.2052	91.1943
7.53262e+07	8.0625	98.2899	91.1348
7.53268e+07	8.06944	98.3745	91.0759
7.53274e+07	8.07639	98.4592	91.0178
7.5328e+07	8.08333	98.5439	90.9602
7.53286e+07	8.09028	98.6285	90.9034
7.53292e+07	8.09722	98.7132	90.8472
7.53298e+07	8.10417	98.7978	90.7916
7.53304e+07	8.11111	98.8825	90.7366
7.5331e+07	8.11806	98.9672	90.6822
7.53316e+07	8.125	99.0518	90.6285
7.53322e+07	8.13194	99.1365	90.5753
7.53328e+07	8.13889	99.2211	90.5228
7.53334e+07	8.14583	99.3058	90.4708
7.5334e+07	8.15278	99.3905	90.4194
7.53346e+07	8.15972	99.4751	90.3686
7.53352e+07	8.16667	99.5598	90.3183
7.53358e+07	8.17361	99.6444	90.2686
7.53364e+07	8.18056	99.7291	90.2194
7.5337e+07	8.1875	99.8137	90.1708
7.53376e+07	8.19444	99.8984	90.1227
7.53382e+07	8.20139	99.9831	90.0751
7.53388e+07	8.20833	100.068	90.0281
7.53394e+07	8.21528	100.152	89.9815
7.534e+07	8.22222	100.237	89.9354
7.53406e+07	8.22917	100.322	89.8899
7.53412e+07	8.23611	100.406	89.8448
7.53418e+07	8.24306	100.491	89.8002
7.53424e+07	8.25	100.576	89.7561
7.5343e+07	8.25694	100.66	89.7125
7.53436e+07	8.26389	100.745	89.6693
7.53442e+07	8.27083	100.83	89.6266
7.53448e+07	8.27778	100.914	89.5844
7.53454e+07	8.28472	100.999	89.5425
7.5346e+07	8.29167	101.084	89.5012
7.53466e+07	8.29861	101.168	89.4602
7.53472e+07	8.30556	101.253	89.4197
7.53478e+07	8.3125	101.338	89.3796
7.53484e+07	8.31944	101.422	89.34
7.5349e+07	8.32639	101.507	89.3007
7.53496e+07	8.33333	101.592	89.2619
7.53502e+07	8.34028	101.676	89.2234
7.53508e+07	8.34722	101.761	89.1854
7.53514e+07	8.35417	101.846	89.1477
7.5352e+07	8.36111	101.93	89.1105
7.53526e+07	8.36806	102.015	89.0736
7.53532e+07	8.375	102.1	89.0371
7.53538e+07	8.38194	102.184	89.001
7.53544e+07	8.38889	102.269	88.9652
7.5355e+07	8.39583	102.354	88.9298
7.53556e+07	8.40278	102.438	88.8948
7.53562e+07	8.40972	102.523	88.8601
7.53568e+07	8.41667	102.608	88.8258
7.53574e+07	8.42361	102.692	88.7918
7.5358e+07	8.43056	102.777	88.7581
7.53586e+07	8.4375	102.861	88.7248
7.53592e+07	8.44444	102.946	88.6918
7.53598e+07	8.45139	103.031	88.6592
7.53604e+07	8.45833	103.115	88.6269
7.5361e+07	8.46528	103.2	88.5949
7.53616e+07	8.47222	103.285	88.5632
7.53622e+07	8.47917	103.369	88.5318
7.53628e+07	8.48611	103.454	88.5008
7.53634e+07	8.49306	103.539	88.47
7.5364e+07	8.5	103.623	88.4396
7.53646e+07	8.50694	103.708	88.4094
7.53652e+07	8.51389	103.793	88.3795
7.53658e+07	8.52083	103.877	88.35
7.53664e+07	8.52778	103.962	88.3207
7.5367e+07	8.53472	104.047	88.2917
7.53676e+07	8.54167	104.131	88.263
7.53682e+07	8.54861	104.216	88.2345
7.53688e+07	8.55556	104.301	88.2064
7.53694e+07	8.5625	104.385	88.1785
7.537e+07	8.56944	104.47	88.1508
7.53706e+07	8.57639	104.555	88.1235
7.53712e+07	8.58333	104.639	88.0964
7.53718e+07	8.59028	104.724	88.0695
7.53724e+07	8.59722	104.809	88.0429
7.5373e+07	8.60417	104.893	88.0166
7.53736e+07	8.61111	104.978	87.9905
7.53742e+07	8.61806	105.063	87.9647
7.53748e+07	8.625	105.147	87.9391
7.53754e+07	8.63194	105.232	87.9137
7.5376e+07	8.63889	105.317	87.8886
7.53766e+07	8.64583	105.401	87.8637
7.53772e+07	8.65278	105.486	87.839
7.53778e+07	8.65972	105.571	87.8146
7.53784e+07	8.66667	105.655	87.7904
7.5379e+07	8.67361	105.74	87.7664
7.53796e+07	8.68056	105.825	87.7426
7.53802e+07	8.6875	105.909	87.7191
7.53808e+07	8.69444	105.994	87.6958
7.53814e+07	8.70139	106.079	87.6726
7.5382e+07	8.70833	106.163	87.6497
7.53826e+07	8.71528	106.248	87.627
7.53832e+07	8.72222	106.333	87.6045
7.53838e+07	8.72917	106.417	87.5823
7.53844e+07	8.73611	106.502	87.5602
7.5385e+07	8.74306	106.587	87.5383
7.53856e+07	8.75	106.671	87.5166
7.53862e+07	8.75694	106.756	87.4951
7.53868e+07	8.76389	106.841	87.4738
7.53874e+07	8.77083	106.925	87.4527
7.5388e+07	8.77778	107.01	87.4317
7.53886e+07	8.78472	107.094	87.411
7.53892e+07	8.79167	107.179	87.3904
7.53898e+07	8.79861	107.264	87.37
7.53904e+07	8.80556	107.348	87.3498
7.5391e+07	8.8125	107.433	87.3298
7.53916e+07	8.81944	107.518	87.31
7.53922e+07	8.82639	107.602	87.2903
7.53928e+07	8.83333	107.687	87.2708
7.53934e+07	8.84028	107.772	87.2514
7.5394e+07	8.84722	107.856	87.2323
7.53946e+07	8.85417	107.941	87.2133
7.53952e+07	8.86111	108.026	87.1944
7.53958e+07	8.86806	108.11	87.1758
7.53964e+07	8.875	108.195	87.1572
7.5397e+07	8.88194	108.28	87.1389
7.53976e+07	8.88889	108.364	87.1207
7.53982e+07	8.89583	108.449	87.1026
7.53988e+07	8.90278	108.534	87.0847
7.53994e+07	8.90972	108.618	87.067
7.54e+07	8.91667	108.703	87.0494
7.54006e+07	8.92361	108.788	87.0319
7.54012e+07	8.93056	108.872	87.0146
7.54018e+07	8.9375	108.957	86.9974
7.54024e+07	8.94444	109.042	86.9804
7.5403e+07	8.95139	109.126	86.9635
7.54036e+07	8.95833	109.211	86.9468
7.54042e+07	8.96528	109.296	86.9302
7.54048e+07	8.97222	109.38	86.9137
7.54054e+07	8.97917	109.465	86.8974
7.5406e+07	8.98611	109.55	86.8812
7.54066e+07	8.99306	109.634	86.8651
7.54072e+07	9	109.719	86.8492
7.54078e+07	9.00694	109.804	86.8334
7.54084e+07	9.01389	109.888	86.8177
7.5409e+07	9.02083	109.973	86.8022
7.54096e+07	9.02778	110.058	86.7867
7.54102e+07	9.03472	110.142	86.7714
7.54108e+07	9.04167	110.227	86.7563
7.54114e+07	9.04861	110.312	86.7412
7.5412e+07	9.05556	110.396	86.7263
7.54126e+07	9.0625	110.481	86.7114
7.54132e+07	9.06944	110.566	86.6967
7.54138e+07	9.07639	110.65	86.6821
7.54144e+07	9.08333	110.735	86.6677
7.5415e+07	9.09028	110.82	86.6533
7.54156e+07	9.09722	110.904	86.639
7.54162e+07	9.10417	110.989	86.6249
7.54168e+07	9.11111	111.073	86.6109
7.54174e+07	9.11806	111.158	86.5969
7.5418e+07	9.125	111.243	86.5831
7.54186e+07	9.13194	111.327	86.5694
7.54192e+07	9.13889	111.412	86.5558
7.54198e+07	9.14583	111.497	86.5423
7.54204e+07	9.15278	111.581	86.5289
7.5421e+07	9.15972	111.666	86.5156
7.54216e+07	9.16667	111.751	86.5024
7.54222e+07	9.17361	111.835	86.4893
7.54228e+07	9.18056	111.92	86.4763
7.54234e+07	9.1875	112.005	86.4634
7.5424e+07	9.19444	112.089	86.4506
7.54246e+07	9.20139	112.174	86.4379
7.54252e+07	9.20833	112.259	86.4253
7.54258e+07	9.21528	112.343	86.4128
7.54264e+07	9.22222	112.428	86.4003
7.5427e+07	9.22917	112.513	86.388
7.54276e+07	9.23611	112.597	86.3757
7.54282e+07	9.24306	112.682	86.3636
7.54288e+07	9.25	112.767	86.3515
7.54294e+07	9.25694	112.851	86.3395
7.543e+07	9.26389	112.936	86.3276
7.54306e+07	9.27083	113.021	86.3158
7.54312e+07	9.27778	113.105	86.3041
7.54318e+07	9.28472	113.19	86.2924
7.54324e+07	9.29167	113.275	86.2809
7.5433e+07	9.29861	113.359	86.2694
7.54336e+07	9.30556	113.444	86.258
7.54342e+07	9.3125	113.529	86.2466
7.54348e+07	9.31944	113.613	86.2354
7.54354e+07	9.32639	113.698	86.2242
7.5436e+07	9.33333	113.783	86.2132
7.54366e+07	9.34028	113.867	86.2022
7.54372e+07	9.34722	113.952	86.1912
7.54378e+07	9.35417	114.037	86.1804
7.54384e+07	9.36111	114.121	86.1696
7.5439e+07	9.36806	114.206	86.1589
7.54396e+07	9.375	114.291	86.1483
7.54402e+07	9.38194	114.375	86.1377
7.54408e+07	9.38889	114.46	86.1272
7.54414e+07	9.39583	114.545	86.1168
7.5442e+07	9.40278	114.629	86.1064
7.54426e+07	9.40972	114.714	86.0962
7.54432e+07	9.41667	114.799	86.0859
7.54438e+07	9.42361	114.883	86.0758
7.54444e+07	9.43056	114.968	86.0657
7.5445e+07	9.4375	115.052	86.0557
7.54456e+07	9.44444	115.137	86.0458
7.54462e+07	9.45139	115.222	86.0359
7.54468e+07	9.45833	115.306	86.0261
7.54474e+07	9.46528	115.391	86.0163
7.5448e+07	9.47222	115.476	86.0066
7.54486e+07	9.47917	115.56	85.997
7.54492e+07	9.48611	115.645	85.9875
7.54498e+07	9.49306	115.73	85.978
7.54504e+07	9.5	115.814	85.9685
7.5451e+07	9.50694	115.899	85.9592
7.54516e+07	9.51389	115.984	85.9498
7.54522e+07	9.52083	116.068	85.9406
7.54528e+07	9.52778	116.153	85.9314
7.54534e+07	9.53472	116.238	85.9222
7.5454e+07	9.54167	116.322	85.9131
7.54546e+07	9.54861	116.407	85.9041
7.54552e+07	9.55556	116.492	85.8951
7.54558e+07	9.5625	116.576	85.8862
7.54564e+07	9.56944	116.661	85.8774
7.5457e+07	9.57639	116.746	85.8686
7.54576e+07	9.58333	116.83	85.8598
7.54582e+07	9.59028	116.915	85.8511
7.54588e+07	9.59722	117	85.8424
7.54594e+07	9.60417	117.084	85.8339
7.546e+07	9.61111	117.169	85.8253
7.54606e+07	9.61806	117.254	85.8168
7.54612e+07	9.625	117.338	85.8084
7.54618e+07	9.63194	117.423	85.8
7.54624e+07	9.63889	117.508	85.7916
7.5463e+07	9.64583	117.592	85.7833
7.54636e+07	9.65278	117.677	85.7751
7.54642e+07	9.65972	117.762	85.7669
7.54648e+07	9.66667	117.846	85.7588
7.54654e+07	9.67361	117.931	85.7507
7.5466e+07	9.68056	118.016	85.7426
7.54666e+07	9.6875	118.1	85.7346
7.54672e+07	9.69444	118.185	85.7266
7.54678e+07	9.70139	118.27	85.7187
7.54684e+07	9.70833	118.354	85.7109
7.5469e+07	9.71528	118.439	85.703
7.54696e+07	9.72222	118.524	85.6952
7.54702e+07	9.72917	118.608	85.6875
7.54708e+07	9.73611	118.693	85.6798
7.54714e+07	9.74306	118.778	85.6722
7.5472e+07	9.75	118.862	85.6646
7.54726e+07	9.75694	118.947	85.657
7.54732e+07	9.76389	119.031	85.6495
7.54738e+07	9.77083	119.116	85.642
7.54744e+07	9.77778	119.201	85.6345
7.5475e+07	9.78472	119.285	85.6271
7.54756e+07	9.79167	119.37	85.6198
7.54762e+07	9.79861	119.455	85.6125
7.54768e+07	9.80556	119.539	85.6052
7.54774e+07	9.8125	119.624	85.5979
7.5478e+07	9.81944	119.709	85.5907
7.54786e+07	9.82639	119.793	85.5836
7.54792e+07	9.83333	119.878	85.5764
7.54798e+07	9.84028	119.963	85.5693
7.54804e+07	9.84722	120.047	85.5623
7.5481e+07	9.85417	120.132	85.5553
7.54816e+07	9.86111	120.217	85.5483
7.54822e+07	9.86806	120.301	85.5414
7.54828e+07	9.875	120.386	85.5344
7.54834e+07	9.88194	120.471	85.5276
7.5484e+07	9.88889	120.555	85.5207
7.54846e+07	9.89583	120.64	85.5139
7.54852e+07	9.90278	120.725	85.5072
7.54858e+07	9.90972	120.809	85.5004
7.54864e+07	9.91667	120.894	85.4937
7.5487e+07	9.92361	120.979	85.4871
7.54876e+07	9.93056	121.063	85.4804
7.54882e+07	9.9375	121.148	85.4738
7.54888e+07	9.94444	121.233	85.4673
7.54894e+07	9.95139	121.317	85.4607
7.549e+07	9.95833	121.402	85.4542
7.54906e+07	9.96528	121.487	85.4478
7.54912e+07	9.97222	121.571	85.4413
7.54918e+07	9.97917	121.656	85.4349
7.54924e+07	9.98611	121.741	85.4286
7.5493e+07	9.99306	121.825	85.4222
7.54936e+07	10	121.91	85.4159
7.54942e+07	10.0069	121.995	85.4096
7.54948e+07	10.0139	122.079	85.4034
7.54954e+07	10.0208	122.164	85.3971
7.5496e+07	10.0278	122.249	85.3909
7.54966e+07	10.0347	122.333	85.3848
7.54972e+07	10.0417	122.418	85.3786
7.54978e+07	10.0486	122.503	85.3725
7.54984e+07	10.0556	122.587	85.3664
7.5499e+07	10.0625	122.672	85.3604
7.54996e+07	10.0694	122.757	85.3544
7.55002e+07	10.0764	122.841	85.3484
7.55008e+07	10.0833	122.926	85.3424
7.55014e+07	10.0903	123.01	85.3365
7.5502e+07	10.0972	123.095	85.3305
7.55026e+07	10.1042	123.18	85.3246
7.55032e+07	10.1111	123.264	85.3188
7.55038e+07	10.1181	123.349	85.3129
7.55044e+07	10.125	123.434	85.3071
7.5505e+07	10.1319	123.518	85.3013
7.55056e+07	10.1389	123.603	85.2956
7.55062e+07	10.1458	123.688	85.2899
7.55068e+07	10.1528	123.772	85.2841
7.55074e+07	10.1597	123.857	85.2785
7.5508e+07	10.1667	123.942	85.2728
7.55086e+07	10.1736	124.026	85.2672
7.55092e+07	10.1806	124.111	85.2615
7.55098e+07	10.1875	124.196	85.256
7.55104e+07	10.1944	124.28	85.2504
7.5511e+07	10.2014	124.365	85.2448
7.55116e+07	10.2083	124.45	85.2393
7.55122e+07	10.2153	124.534	85.2338
7.55128e+07	10.2222	124.619	85.2284
7.55134e+07	10.2292	124.704	85.2229
7.5514e+07	10.2361	124.788	85.2175
7.55146e+07	10.2431	124.873	85.2121
7.55152e+07	10.25	124.958	85.2067
7.55158e+07	10.2569	125.042	85.2013
7.55164e+07	10.2639	125.127	85.196
7.5517e+07	10.2708	125.212	85.1907
7.55176e+07	10.2778	125.296	85.1854
7.55182e+07	10.2847	125.381	85.1801
7.55188e+07	10.2917	125.466	85.1749
7.55194e+07	10.2986	125.55	85.1696
7.552e+07	10.3056	125.635	85.1644
7.55206e+07	10.3125	125.72	85.1592
7.55212e+07	10.3194	125.804	85.154
7.55218e+07	10.3264	125.889	85.1489
7.55224e+07	10.3333	125.974	85.1438
7.5523e+07	10.3403	126.058	85.1386
7.55236e+07	10.3472	126.143	85.1336
7.55242e+07	10.3542	126.228	85.1285
7.55248e+07	10.3611	126.312	85.1234
7.55254e+07	10.3681	126.397	85.1184
7.5526e+07	10.375	126.482	85.1134
7.55266e+07	10.3819	126.566	85.1084
7.55272e+07	10.3889	126.651	85.1034
7.55278e+07	10.3958	126.736	85.0984
7.55284e+07	10.4028	126.82	85.0935
7.5529e+07	10.4097	126.905	85.0886
7.55296e+07	10.4167	126.99	85.0837
7.55302e+07	10.4236	127.074	85.0788
7.55308e+07	10.4306	127.159	85.0739
7.55314e+07	10.4375	127.243	85.0691
7.5532e+07	10.4444	127.328	85.0642
7.55326e+07	10.4514	127.413	85.0594
7.55332e+07	10.4583	127.497	85.0546
7.55338e+07	10.4653	127.582	85.0498
7.55344e+07	10.4722	127.667	85.0451
7.5535e+07	10.4792	127.751	85.0403
7.55356e+07	10.4861	127.836	85.0356
7.55362e+07	10.4931	127.921	85.0309
7.55368e+07	10.5	128.005	85.0262
7.55374e+07	10.5069	128.09	85.0215
7.5538e+07	10.5139	128.175	85.0168
7.55386e+07	10.5208	128.259	85.0122
7.55392e+07	10.5278	128.344	85.0075
7.55398e+07	10.5347	128.429	85.0029
7.55404e+07	10.5417	128.513	84.9983
7.5541e+07	10.5486	128.598	84.9937
7.55416e+07	10.5556	128.683	84.9892
7.55422e+07	10.5625	128.767	84.9846
7.55428e+07	10.5694	128.852	84.9801
7.55434e+07	10.5764	128.937	84.9755
7.5544e+07	10.5833	129.021	84.971
7.55446e+07	10.5903	129.106	84.9665
7.55452e+07	10.5972	129.191	84.962
7.55458e+07	10.6042	129.275	84.9576
7.55464e+07	10.6111	129.36	84.9531
7.5547e+07	10.6181	129.445	84.9487
7.55476e+07	10.625	129.529	84.9442
7.55482e+07	10.6319	129.614	84.9398
7.55488e+07	10.6389	129.699	84.9354
7.55494e+07	10.6458	129.783	84.9311
7.555e+07	10.6528	129.868	84.9267
7.55506e+07	10.6597	129.953	84.9223
7.55512e+07	10.6667	130.037	84.918
7.55518e+07	10.6736	130.122	84.9137
7.55524e+07	10.6806	130.207	84.9093
7.5553e+07	10.6875	130.291	84.905
7.55536e+07	10.6944	130.376	84.9008
7.55542e+07	10.7014	130.461	84.8965
7.55548e+07	10.7083	130.545	84.8922
7.55554e+07	10.7153	130.63	84.888
7.5556e+07	10.7222	130.715	84.8837
7.55566e+07	10.7292	130.799	84.8795
7.55572e+07	10.7361	130.884	84.8753
7.55578e+07	10.7431	130.969	84.8711
7.55584e+07	10.75	131.053	84.8669
7.5559e+07	10.7569	131.138	84.8627
7.55596e+07	10.7639	131.222	84.8586
7.55602e+07	10.7708	131.307	84.8544
7.55608e+07	10.7778	131.392	84.8503
7.55614e+07	10.7847	131.476	84.8462
7.5562e+07	10.7917	131.561	84.8421
7.55626e+07	10.7986	131.646	84.838
7.55632e+07	10.8056	131.73	84.8339
7.55638e+07	10.8125	131.815	84.8298
7.55644e+07	10.8194	131.9	84.8257
7.5565e+07	10.8264	131.984	84.8217
7.55656e+07	10.8333	132.069	84.8176
7.55662e+07	10.8403	132.154	84.8136
7.55668e+07	10.8472	132.238	84.8096
7.55674e+07	10.8542	132.323	84.8056
7.5568e+07	10.8611	132.408	84.8016
7.55686e+07	10.8681	132.492	84.7976
7.55692e+07	10.875	132.577	84.7936
7.55698e+07	10.8819	132.662	84.7896
7.55704e+07	10.8889	132.746	84.7857
7.5571e+07	10.8958	132.831	84.7817
7.55716e+07	10.9028	132.916	84.7778
7.55722e+07	10.9097	133	84.7739
7.55728e+07	10.9167	133.085	84.77
7.55734e+07	10.9236	133.17	84.7661
7.5574e+07	10.9306	133.254	84.7622
7.55746e+07	10.9375	133.339	84.7583
7.55752e+07	10.9444	133.424	84.7544
7.55758e+07	10.9514	133.508	84.7505
7.55764e+07	10.9583	133.593	84.7467
7.5577e+07	10.9653	133.678	84.7429
7.55776e+07	10.9722	133.762	84.739
7.55782e+07	10.9792	133.847	84.7352
7.55788e+07	10.9861	133.932	84.7314
7.55794e+07	10.9931	134.016	84.7276
7.558e+07	11	134.101	84.7238
7.55806e+07	11.0069	134.186	84.72
7.55812e+07	11.0139	134.27	84.7162
7.55818e+07	11.0208	134.355	84.7125
7.55824e+07	11.0278	134.44	84.7087
7.5583e+07	11.0347	134.524	84.705
7.55836e+07	11.0417	134.609	84.7012
7.55842e+07	11.0486	134.694	84.6975
7.55848e+07	11.0556	134.778	84.6938
7.55854e+07	11.0625	134.863	84.6901
7.5586e+07	11.0694	134.948	84.6864
7.55866e+07	11.0764	135.032	84.6827
7.55872e+07	11.0833	135.117	84.679
7.55878e+07	11.0903	135.201	84.6753
7.55884e+07	11.0972	135.286	84.6717
7.5589e+07	11.1042	135.371	84.668
7.55896e+07	11.1111	135.455	84.6644
7.55902e+07	11.1181	135.54	84.6607
7.55908e+07	11.125	135.625	84.6571
7.55914e+07	11.1319	135.709	84.6535
7.5592e+07	11.1389	135.794	84.6499
7.55926e+07	11.1458	135.879	84.6463
7.55932e+07	11.1528	135.963	84.6427
7.55938e+07	11.1597	136.048	84.6391
7.55944e+07	11.1667	136.133	84.6355
7.5595e+07	11.1736	136.217	84.6319
7.55956e+07	11.1806	136.302	84.6284
7.55962e+07	11.1875	136.387	84.6248
7.55968e+07	11.1944	136.471	84.6213
7.55974e+07	11.2014	136.556	84.6177
7.5598e+07	11.2083	136.641	84.6142
7.55986e+07	11.2153	136.725	84.6107
7.55992e+07	11.2222	136.81	84.6072
7.55998e+07	11.2292	136.895	84.6036
7.56004e+07	11.2361	136.979	84.6002
7.5601e+07	11.2431	137.064	84.5967
7.56016e+07	11.25	137.149	84.5932
7.56022e+07	11.2569	137.233	84.5897
7.56028e+07	11.2639	137.318	84.5862
7.56034e+07	11.2708	137.403	84.5828
7.5604e+07	11.2778	137.487	84.5793
7.56046e+07	11.2847	137.572	84.5759
7.56052e+07	11.2917	137.657	84.5724
7.56058e+07	11.2986	137.741	84.569
7.56064e+07	11.3056	137.826	84.5656
7.5607e+07	11.3125	137.911	84.5622
7.56076e+07	11.3194	137.995	84.5587
7.56082e+07	11.3264	138.08	84.5553
7.56088e+07	11.3333	138.165	84.5519
7.56094e+07	11.3403	138.249	84.5486
7.561e+07	11.3472	138.334	84.5452
7.56106e+07	11.3542	138.419	84.5418
7.56112e+07	11.3611	138.503	84.5384
7.56118e+07	11.3681	138.588	84.5351
7.56124e+07	11.375	138.673	84.5317
7.5613e+07	11.3819	138.757	84.5284
7.56136e+07	11.3889	138.842	84.525
7.56142e+07	11.3958	138.927	84.5217
7.56148e+07	11.4028	139.011	84.5184
7.56154e+07	11.4097	139.096	84.515
7.5616e+07	11.4167	139.18	84.5117
7.56166e+07	11.4236	139.265	84.5084
7.56172e+07	11.4306	139.35	84.5051
7.56178e+07	11.4375	139.434	84.5018
7.56184e+07	11.4444	139.519	84.4985
7.5619e+07	11.4514	139.604	84.4953
7.56196e+07	11.4583	139.688	84.492
7.56202e+07	11.4653	139.773	84.4887
7.56208e+07	11.4722	139.858	84.4854
7.56214e+07	11.4792	139.942	84.4822
7.5622e+07	11.4861	140.027	84.4789
7.56226e+07	11.4931	140.112	84.4757
7.56232e+07	11.5	140.196	84.4725
7.56238e+07	11.5069	140.281	84.4692
7.56244e+07	11.5139	140.366	84.466
7.5625e+07	11.5208	140.45	84.4628
7.56256e+07	11.5278	140.535	84.4596
7.56262e+07	11.5347	140.62	84.4564
7.56268e+07	11.5417	140.704	84.4532
7.56274e+07	11.5486	140.789	84.45
7.5628e+07	11.5556	140.874	84.4468
7.56286e+07	11.5625	140.958	84.4436
7.56292e+07	11.5694	141.043	84.4404
7.56298e+07	11.5764	141.128	84.4373
7.56304e+07	11.5833	141.212	84.4341
7.5631e+07	11.5903	141.297	84.4309
7.56316e+07	11.5972	141.382	84.4278
7.56322e+07	11.6042	141.466	84.4246
7.56328e+07	11.6111	141.551	84.4215
7.56334e+07	11.6181	141.636	84.4183
7.5634e+07	11.625	141.72	84.4152
7.56346e+07	11.6319	141.805	84.4121
7.56352e+07	11.6389	141.89	84.409
7.56358e+07	11.6458	141.974	84.4059
7.56364e+07	11.6528	142.059	84.4027
7.5637e+07	11.6597	142.144	84.3996
7.56376e+07	11.6667	142.228	84.3965
7.56382e+07	11.6736	142.313	84.3934
7.56388e+07	11.6806	142.398	84.3904
7.56394e+07	11.6875	142.482	84.3873
7.564e+07	11.6944	142.567	84.3842
7.56406e+07	11.7014	142.652	84.3811
7.56412e+07	11.7083	142.736	84.3781
7.56418e+07	11.7153	142.821	84.375
7.56424e+07	11.7222	142.906	84.3719
7.5643e+07	11.7292	142.99	84.3689
7.56436e+07	11.7361	143.075	84.3659
7.56442e+07	11.7431	143.159	84.3628
7.56448e+07	11.75	143.244	84.3598
7.56454e+07	11.7569	143.329	84.3567
7.5646e+07	11.7639	143.413	84.3537
7.56466e+07	11.7708	143.498	84.3507
7.56472e+07	11.7778	143.583	84.3477
7.56478e+07	11.7847	143.667	84.3447
7.56484e+07	11.7917	143.752	84.3417
7.5649e+07	11.7986	143.837	84.3387
7.56496e+07	11.8056	143.921	84.3357
7.56502e+07	11.8125	144.006	84.3327
7.56508e+07	11.8194	144.091	84.3297
7.56514e+07	11.8264	144.175	84.3267
7.5652e+07	11.8333	144.26	84.3237
7.56526e+07	11.8403	144.345	84.3208
7.56532e+07	11.8472	144.429	84.3178
7.56538e+07	11.8542	144.514	84.3149
7.56544e+07	11.8611	144.599	84.3119
7.5655e+07	11.8681	144.683	84.3089
7.56556e+07	11.875	144.768	84.306
7.56562e+07	11.8819	144.853	84.3031
7.56568e+07	11.8889	144.937	84.3001
7.56574e+07	11.8958	145.022	84.2972
7.5658e+07	11.9028	145.107	84.2943
7.56586e+07	11.9097	145.191	84.2913
7.56592e+07	11.9167	145.276	84.2884
7.56598e+07	11.9236	145.361	84.2855
7.56604e+07	11.9306	145.445	84.2826
7.5661e+07	11.9375	145.53	84.2797
7.56616e+07	11.9444	145.615	84.2768
7.56622e+07	11.9514	145.699	84.2739
7.56628e+07	11.9583	145.784	84.271
7.56634e+07	11.9653	145.869	84.2681
7.5664e+07	11.9722	145.953	84.2652
7.56646e+07	11.9792	146.038	84.2623
7.56652e+07	11.9861	146.123	84.2595
7.56658e+07	11.9931	146.207	84.2566
7.56664e+07	12	146.292	84.2537
7.5667e+07	12.0069	146.377	84.2509
7.56676e+07	12.0139	146.461	84.248
7.56682e+07	12.0208	146.546	84.2452
7.56688e+07	12.0278	146.631	84.2423
7.56694e+07	12.0347	146.715	84.2395
7.567e+07	12.0417	146.8	84.2366
7.56706e+07	12.0486	146.885	84.2338
7.56712e+07	12.0556	146.969	84.231
7.56718e+07	12.0625	147.054	84.2281
7.56724e+07	12.0694	147.139	84.2253
7.5673e+07	12.0764	147.223	84.2225
7.56736e+07	12.0833	147.308	84.2197
7.56742e+07	12.0903	147.392	84.2169
7.56748e+07	12.0972	147.477	84.2141
7.56754e+07	12.1042	147.562	84.2113
7.5676e+07	12.1111	147.646	84.2085
7.56766e+07	12.1181	147.731	84.2057
7.56772e+07	12.125	147.816	84.2029
7.56778e+07	12.1319	147.9	84.2001
7.56784e+07	12.1389	147.985	84.1973
7.5679e+07	12.1458	148.07	84.1945
7.56796e+07	12.1528	148.154	84.1917
7.56802e+07	12.1597	148.239	84.189
7.56808e+07	12.1667	148.324	84.1862
7.56814e+07	12.1736	148.408	84.1834
7.5682e+07	12.1806	148.493	84.1807
7.56826e+07	12.1875	148.578	84.1779
7.56832e+07	12.1944	148.662	84.1752
7.56838e+07	12.2014	148.747	84.1724
7.56844e+07	12.2083	148.832	84.1697
7.5685e+07	12.2153	148.916	84.1669
7.56856e+07	12.2222	149.001	84.1642
7.56862e+07	12.2292	149.086	84.1615
7.56868e+07	12.2361	149.17	84.1587
7.56874e+07	12.2431	149.255	84.156
7.5688e+07	12.25	149.34	84.1533
7.56886e+07	12.2569	149.424	84.1506
7.56892e+07	12.2639	149.509	84.1479
7.56898e+07	12.2708	149.594	84.1452
7.56904e+07	12.2778	149.678	84.1424
7.5691e+07	12.2847	149.763	84.1397
7.56916e+07	12.2917	149.848	84.137
7.56922e+07	12.2986	149.932	84.1343
7.56928e+07	12.3056	150.017	84.1317
7.56934e+07	12.3125	150.102	84.129
7.5694e+07	12.3194	150.186	84.1263
7.56946e+07	12.3264	150.271	84.1236
7.56952e+07	12.3333	150.356	84.1209
7.56958e+07	12.3403	150.44	84.1182
7.56964e+07	12.3472	150.525	84.1156
7.5697e+07	12.3542	150.61	84.1129
7.56976e+07	12.3611	150.694	84.1102
7.56982e+07	12.3681	150.779	84.1076
7.56988e+07	12.375	150.864	84.1049
7.56994e+07	12.3819	150.948	84.1023
7.57e+07	12.3889	151.033	84.0996
7.57006e+07	12.3958	151.118	84.097
7.57012e+07	12.4028	151.202	84.0943
7.57018e+07	12.4097	151.287	84.0917
7.57024e+07	12.4167	151.371	84.0891
7.5703e+07	12.4236	151.456	84.0864
7.57036e+07	12.4306	151.541	84.0838
7.57042e+07	12.4375	151.625	84.0812
7.57048e+07	12.4444	151.71	84.0785
7.57054e+07	12.4514	151.795	84.0759
7.5706e+07	12.4583	151.879	84.0733
7.57066e+07	12.4653	151.964	84.0707
7.57072e+07	12.4722	152.049	84.0681
7.57078e+07	12.4792	152.133	84.0655
7.57084e+07	12.4861	152.218	84.0629
7.5709e+07	12.4931	152.303	84.0603
7.57096e+07	12.5	152.387	84.0577
7.57102e+07	12.5069	152.472	84.0551
7.57108e+07	12.5139	152.557	84.0525
7.57114e+07	12.5208	152.641	84.0499
7.5712e+07	12.5278	152.726	84.0473
7.57126e+07	12.5347	152.811	84.0447
7.57132e+07	12.5417	152.895	84.0422
7.57138e+07	12.5486	152.98	84.0396
7.57144e+07	12.5556	153.065	84.037
7.5715e+07	12.5625	153.149	84.0344
7.57156e+07	12.5694	153.234	84.0319
7.57162e+07	12.5764	153.319	84.0293
7.57168e+07	12.5833	153.403	84.0268
7.57174e+07	12.5903	153.488	84.0242
7.5718e+07	12.5972	153.573	84.0216
7.57186e+07	12.6042	153.657	84.0191
7.57192e+07	12.6111	153.742	84.0165
7.57198e+07	12.6181	153.827	84.014
7.57204e+07	12.625	153.911	84.0115
7.5721e+07	12.6319	153.996	84.0089
7.57216e+07	12.6389	154.081	84.0064
7.57222e+07	12.6458	154.165	84.0039
7.57228e+07	12.6528	154.25	84.0013
7.57234e+07	12.6597	154.335	83.9988
7.5724e+07	12.6667	154.419	83.9963
7.57246e+07	12.6736	154.504	83.9938
7.57252e+07	12.6806	154.589	83.9912
7.57258e+07	12.6875	154.673	83.9887
7.57264e+07	12.6944	154.758	83.9862
7.5727e+07	12.7014	154.843	83.9837
7.57276e+07	12.7083	154.927	83.9812
7.57282e+07	12.7153	155.012	83.9787
7.57288e+07	12.7222	155.097	83.9762
7.57294e+07	12.7292	155.181	83.9737
7.573e+07	12.7361	155.266	83.9712
7.57306e+07	12.7431	155.35	83.9687
7.57312e+07	12.75	155.435	83.9662
7.57318e+07	12.7569	155.52	83.9637
7.57324e+07	12.7639	155.604	83.9613
7.5733e+07	12.7708	155.689	83.9588
7.57336e+07	12.7778	155.774	83.9563
7.57342e+07	12.7847	155.858	83.9538
7.57348e+07	12.7917	155.943	83.9514
7.57354e+07	12.7986	156.028	83.9489
7.5736e+07	12.8056	156.112	83.9464
7.57366e+07	12.8125	156.197	83.944
7.57372e+07	12.8194	156.282	83.9415
7.57378e+07	12.8264	156.366	83.9391
7.57384e+07	12.8333	156.451	83.9366
7.5739e+07	12.8403	156.536	83.9341
7.57396e+07	12.8472	156.62	83.9317
7.57402e+07	12.8542	156.705	83.9292
7.57408e+07	12.8611	156.79	83.9268
7.57414e+07	12.8681	156.874	83.9244
7.5742e+07	12.875	156.959	83.9219
7.57426e+07	12.8819	157.044	83.9195
7.57432e+07	12.8889	157.128	83.9171
7.57438e+07	12.8958	157.213	83.9146
7.57444e+07	12.9028	157.298	83.9122
7.5745e+07	12.9097	157.382	83.9098
7.57456e+07	12.9167	157.467	83.9074
7.57462e+07	12.9236	157.552	83.9049
7.57468e+07	12.9306	157.636	83.9025
7.57474e+07	12.9375	157.721	83.9001
7.5748e+07	12.9444	157.806	83.8977
7.57486e+07	12.9514	157.89	83.8953
7.57492e+07	12.9583	157.975	83.8929
7.57498e+07	12.9653	158.06	83.8905
7.57504e+07	12.9722	158.144	83.8881
7.5751e+07	12.9792	158.229	83.8857
7.57516e+07	12.9861	158.314	83.8833
7.57522e+07	12.9931	158.398	83.8809
7.57528e+07	13	158.483	83.8785
7.57534e+07	13.0069	158.568	83.8761
7.5754e+07	13.0139	158.652	83.8737
7.57546e+07	13.0208	158.737	83.8713
7.57552e+07	13.0278	158.822	83.869
7.57558e+07	13.0347	158.906	83.8666
7.57564e+07	13.0417	158.991	83.8642
7.5757e+07	13.0486	159.076	83.8618
7.57576e+07	13.0556	159.16	83.8595
7.57582e+07	13.0625	159.245	83.8571
7.57588e+07	13.0694	159.329	83.8547
7.57594e+07	13.0764	159.414	83.8524
7.576e+07	13.0833	159.499	83.85
7.57606e+07	13.0903	159.583	83.8476
7.57612e+07	13.0972	159.668	83.8453
7.57618e+07	13.1042	159.753	83.8429
7.57624e+07	13.1111	159.837	83.8406
7.5763e+07	13.1181	159.922	83.8382
7.57636e+07	13.125	160.007	83.8359
7.57642e+07	13.1319	160.091	83.8335
7.57648e+07	13.1389	160.176	83.8312
7.57654e+07	13.1458	160.261	83.8289
7.5766e+07	13.1528	160.345	83.8265
7.57666e+07	13.1597	160.43	83.8242
7.57672e+07	13.1667	160.515	83.8219
7.57678e+07	13.1736	160.599	83.8195
7.57684e+07	13.1806	160.684	83.8172
7.5769e+07	13.1875	160.769	83.8149
7.57696e+07	13.1944	160.853	83.8126
7.57702e+07	13.2014	160.938	83.8102
7.57708e+07	13.2083	161.023	83.8079
7.57714e+07	13.2153	161.107	83.8056
7.5772e+07	13.2222	161.192	83.8033
7.57726e+07	13.2292	161.277	83.801
7.57732e+07	13.2361	161.361	83.7987
7.57738e+07	13.2431	161.446	83.7964
7.57744e+07	13.25	161.531	83.7941
7.5775e+07	13.2569	161.615	83.7918
7.57756e+07	13.2639	161.7	83.7895
7.57762e+07	13.2708	161.785	83.7872
7.57768e+07	13.2778	161.869	83.7849
7.57774e+07	13.2847	161.954	83.7826
7.5778e+07	13.2917	162.039	83.7803
7.57786e+07	13.2986	162.123	83.778
7.57792e+07	13.3056	162.208	83.7757
7.57798e+07	13.3125	162.293	83.7734
7.57804e+07	13.3194	162.377	83.7712
7.5781e+07	13.3264	162.462	83.7689
7.57816e+07	13.3333	162.547	83.7666
7.57822e+07	13.3403	162.631	83.7643
7.57828e+07	13.3472	162.716	83.7621
7.57834e+07	13.3542	162.801	83.7598
7.5784e+07	13.3611	162.885	83.7575
7.57846e+07	13.3681	162.97	83.7552
7.57852e+07	13.375	163.055	83.753
7.57858e+07	13.3819	163.139	83.7507
7.57864e+07	13.3889	163.224	83.7485
7.5787e+07	13.3958	163.308	83.7462
7.57876e+07	13.4028	163.393	83.744
7.57882e+07	13.4097	163.478	83.7417
7.57888e+07	13.4167	163.562	83.7395
7.57894e+07	13.4236	163.647	83.7372
7.579e+07	13.4306	163.732	83.735
7.57906e+07	13.4375	163.816	83.7327
7.57912e+07	13.4444	163.901	83.7305
7.57918e+07	13.4514	163.986	83.7282
7.57924e+07	13.4583	164.07	83.726
7.5793e+07	13.4653	164.155	83.7238
7.57936e+07	13.4722	164.24	83.7215
7.57942e+07	13.4792	164.324	83.7193
7.57948e+07	13.4861	164.409	83.7171
7.57954e+07	13.4931	164.494	83.7148
7.5796e+07	13.5	164.578	83.7126
7.57966e+07	13.5069	164.663	83.7104
7.57972e+07	13.5139	164.748	83.7082
7.57978e+07	13.5208	164.832	83.706
7.57984e+07	13.5278	164.917	83.7037
7.5799e+07	13.5347	165.002	83.7015
7.57996e+07	13.5417	165.086	83.6993
7.58002e+07	13.5486	165.171	83.6971
7.58008e+07	13.5556	165.256	83.6949
7.58014e+07	13.5625	165.34	83.6927
7.5802e+07	13.5694	165.425	83.6905
7.58026e+07	13.5764	165.51	83.6883
7.58032e+07	13.5833	165.594	83.6861
7.58038e+07	13.5903	165.679	83.6839
7.58044e+07	13.5972	165.764	83.6817
7.5805e+07	13.6042	165.848	83.6795
7.58056e+07	13.6111	165.933	83.6773
7.58062e+07	13.6181	166.018	83.6751
7.58068e+07	13.625	166.102	83.6729
7.58074e+07	13.6319	166.187	83.6707
7.5808e+07	13.6389	166.272	83.6686
7.58086e+07	13.6458	166.356	83.6664
7.58092e+07	13.6528	166.441	83.6642
7.58098e+07	13.6597	166.526	83.662
7.58104e+07	13.6667	166.61	83.6598
7.5811e+07	13.6736	166.695	83.6577
7.58116e+07	13.6806	166.78	83.6555
7.58122e+07	13.6875	166.864	83.6533
7.58128e+07	13.6944	166.949	83.6512
7.58134e+07	13.7014	167.034	83.649
7.5814e+07	13.7083	167.118	83.6468
7.58146e+07	13.7153	167.203	83.6447
7.58152e+07	13.7222	167.288	83.6425
7.58158e+07	13.7292	167.372	83.6403
7.58164e+07	13.7361	167.457	83.6382
7.5817e+07	13.7431	167.541	83.636
7.58176e+07	13.75	167.626	83.6339
7.58182e+07	13.7569	167.711	83.6317
7.58188e+07	13.7639	167.795	83.6296
7.58194e+07	13.7708	167.88	83.6274
7.582e+07	13.7778	167.965	83.6253
7.58206e+07	13.7847	168.049	83.6231
7.58212e+07	13.7917	168.134	83.621
7.58218e+07	13.7986	168.219	83.6189
7.58224e+07	13.8056	168.303	83.6167
7.5823e+07	13.8125	168.388	83.6146
7.58236e+07	13.8194	168.473	83.6125
7.58242e+07	13.8264	168.557	83.6103
7.58248e+07	13.8333	168.642	83.6082
7.58254e+07	13.8403	168.727	83.6061
7.5826e+07	13.8472	168.811	83.6039
7.58266e+07	13.8542	168.896	83.6018
7.58272e+07	13.8611	168.981	83.5997
7.58278e+07	13.8681	169.065	83.5976
7.58284e+07	13.875	169.15	83.5955
[truncated: 2,255 more rows]

## Sheet: Figure 8&9
Time, s	Time,hr	Bottom	2nd layer	3rd layer	4th layer	Top	Lander (Average)	Rover		Lander	MAX (bottom)		min (Top)
0	0	259.081	258.996	258.842	258.579	258.117	258.723	263.468			222.33 hr	318.698	708.73 hr	257.383
600	0.166667	259.29	259.208	259.011	258.58	257.607	258.739	263.603
1200	0.333333	259.495	259.393	259.142	258.625	257.578	258.847	263.731		Rover	MAX		min
1800	0.5	259.681	259.562	259.275	258.716	257.638	258.974	263.856			222.33 hr	310.302	708.73 hr	262.689
2400	0.666667	259.85	259.717	259.407	258.823	257.729	259.105	263.98
3000	0.833333	260.005	259.864	259.539	258.938	257.833	259.236	264.102
3600	1	260.151	260.005	259.67	259.059	257.946	259.366	264.224
4200	1.16667	260.291	260.141	259.8	259.182	258.064	259.496	264.344
4800	1.33333	260.427	260.276	259.93	259.307	258.186	259.625	264.464
5400	1.5	260.561	260.408	260.06	259.434	258.309	259.754	264.583
6000	1.66667	260.693	260.539	260.189	259.56	258.433	259.883	264.701
6600	1.83333	260.824	260.67	260.318	259.688	258.558	260.012	264.819
7200	2	260.955	260.799	260.447	259.815	258.684	260.14	264.935
7800	2.16667	261.084	260.929	260.575	259.942	258.809	260.268	265.051
8400	2.33333	261.214	261.058	260.703	260.069	258.935	260.396	265.167
9000	2.5	261.342	261.186	260.832	260.197	259.06	260.523	265.282
9600	2.66667	261.471	261.315	260.959	260.324	259.186	260.651	265.396
10200	2.83333	261.6	261.443	261.087	260.45	259.311	260.778	265.509
10800	3	261.728	261.571	261.215	260.577	259.436	260.905	265.622
11400	3.16667	261.856	261.699	261.342	260.703	259.561	261.032	265.734
12000	3.33333	261.983	261.826	261.469	260.83	259.685	261.159	265.845
12600	3.5	262.111	261.954	261.596	260.956	259.81	261.285	265.956
13200	3.66667	262.239	262.081	261.723	261.082	259.934	261.412	266.066
13800	3.83333	262.366	262.208	261.849	261.207	260.058	261.538	266.175
14400	4	262.493	262.335	261.976	261.333	260.182	261.664	266.284
15000	4.16667	262.62	262.462	262.102	261.458	260.306	261.789	266.392
15600	4.33333	262.746	262.588	262.228	261.583	260.43	261.915	266.499
16200	4.5	262.873	262.714	262.353	261.708	260.553	262.04	266.606
16800	4.66667	262.999	262.84	262.479	261.833	260.676	262.165	266.713
17400	4.83333	263.125	262.966	262.605	261.957	260.799	262.29	266.818
18000	5	263.251	263.092	262.73	262.082	260.922	262.415	266.923
18600	5.16667	263.377	263.218	262.855	262.206	261.044	262.54	267.028
19200	5.33333	263.503	263.343	262.98	262.33	261.167	262.664	267.131
19800	5.5	263.628	263.468	263.104	262.454	261.289	262.789	267.235
20400	5.66667	263.753	263.593	263.229	262.577	261.411	262.913	267.337
21000	5.83333	263.878	263.718	263.353	262.701	261.533	263.037	267.439
21600	6	264.003	263.843	263.477	262.824	261.655	263.16	267.541
22200	6.16667	264.128	263.967	263.601	262.947	261.776	263.284	267.642
22800	6.33333	264.252	264.091	263.725	263.07	261.898	263.407	267.742
23400	6.5	264.377	264.215	263.849	263.193	262.019	263.53	267.842
24000	6.66667	264.501	264.339	263.972	263.315	262.14	263.653	267.941
24600	6.83333	264.625	264.463	264.095	263.438	262.261	263.776	268.04
25200	7	264.749	264.587	264.219	263.56	262.381	263.899	268.138
25800	7.16667	264.872	264.71	264.341	263.682	262.502	264.021	268.235
26400	7.33333	264.996	264.833	264.464	263.804	262.622	264.144	268.332
27000	7.5	265.119	264.956	264.587	263.925	262.742	264.266	268.429
27600	7.66667	265.242	265.079	264.709	264.047	262.862	264.388	268.525
28200	7.83333	265.365	265.202	264.831	264.168	262.982	264.51	268.62
28800	8	265.488	265.324	264.953	264.289	263.101	264.631	268.715
29400	8.16667	265.61	265.447	265.075	264.41	263.221	264.753	268.809
30000	8.33333	265.733	265.569	265.197	264.531	263.34	264.874	268.903
30600	8.5	265.855	265.691	265.318	264.652	263.459	264.995	268.996
31200	8.66667	265.977	265.813	265.44	264.772	263.578	265.116	269.089
31800	8.83333	266.099	265.934	265.561	264.892	263.696	265.236	269.181
32400	9	266.22	266.056	265.682	265.012	263.815	265.357	269.273
33000	9.16667	266.342	266.177	265.802	265.132	263.933	265.477	269.365
33600	9.33333	266.463	266.298	265.923	265.252	264.051	265.597	269.455
34200	9.5	266.584	266.419	266.043	265.371	264.169	265.717	269.546
34800	9.66667	266.705	266.54	266.163	265.491	264.287	265.837	269.635
35400	9.83333	266.826	266.66	266.283	265.61	264.405	265.957	269.725
36000	10	266.946	266.781	266.403	265.729	264.522	266.076	269.813
36600	10.1667	267.067	266.901	266.523	265.848	264.639	266.195	269.902
37200	10.3333	267.187	267.021	266.642	265.966	264.756	266.314	269.99
37800	10.5	267.307	267.14	266.762	266.085	264.873	266.433	270.077
38400	10.6667	267.427	267.26	266.881	266.203	264.99	266.552	270.164
39000	10.8333	267.546	267.379	267	266.321	265.106	266.67	270.25
39600	11	267.666	267.499	267.118	266.439	265.222	266.789	270.336
40200	11.1667	267.785	267.618	267.237	266.556	265.338	266.907	270.422
40800	11.3333	267.904	267.736	267.355	266.674	265.454	267.025	270.507
41400	11.5	268.023	267.855	267.473	266.791	265.57	267.142	270.591
42000	11.6667	268.142	267.973	267.591	266.908	265.685	267.26	270.675
42600	11.8333	268.26	268.092	267.709	267.025	265.801	267.377	270.759
43200	12	268.378	268.21	267.827	267.142	265.916	267.494	270.842
43800	12.1667	268.496	268.328	267.944	267.258	266.031	267.611	270.925
44400	12.3333	268.614	268.445	268.061	267.374	266.146	267.728	271.007
45000	12.5	268.732	268.563	268.178	267.49	266.26	267.845	271.088
45600	12.6667	268.849	268.68	268.295	267.606	266.374	267.961	271.17
46200	12.8333	268.967	268.797	268.411	267.722	266.488	268.077	271.251
46800	13	269.084	268.914	268.528	267.837	266.602	268.193	271.331
47400	13.1667	269.201	269.031	268.644	267.953	266.716	268.309	271.411
48000	13.3333	269.317	269.147	268.76	268.068	266.83	268.424	271.49
48600	13.5	269.434	269.263	268.876	268.183	266.943	268.54	271.569
49200	13.6667	269.55	269.379	268.991	268.297	267.056	268.655	271.648
49800	13.8333	269.666	269.495	269.107	268.412	267.169	268.77	271.726
50400	14	269.782	269.611	269.222	268.526	267.282	268.884	271.804
51000	14.1667	269.898	269.726	269.337	268.64	267.394	268.999	271.881
51600	14.3333	270.013	269.841	269.451	268.754	267.507	269.113	271.958
52200	14.5	270.128	269.956	269.566	268.868	267.619	269.227	272.035
52800	14.6667	270.243	270.071	269.68	268.981	267.731	269.341	272.111
53400	14.8333	270.358	270.186	269.794	269.094	267.842	269.455	272.186
54000	15	270.473	270.3	269.908	269.208	267.954	269.569	272.261
54600	15.1667	270.587	270.414	270.022	269.32	268.065	269.682	272.336
55200	15.3333	270.701	270.528	270.136	269.433	268.176	269.795	272.41
55800	15.5	270.815	270.642	270.249	269.545	268.287	269.908	272.484
56400	15.6667	270.929	270.756	270.362	269.658	268.398	270.021	272.558
57000	15.8333	271.043	270.869	270.475	269.77	268.508	270.133	272.631
57600	16	271.156	270.982	270.587	269.882	268.619	270.245	272.703
58200	16.1667	271.269	271.095	270.7	269.993	268.729	270.357	272.775
58800	16.3333	271.382	271.208	270.812	270.105	268.839	270.469	272.847
59400	16.5	271.495	271.321	270.924	270.216	268.948	270.581	272.919
60000	16.6667	271.608	271.433	271.036	270.327	269.058	270.692	272.99
60600	16.8333	271.72	271.545	271.148	270.438	269.167	270.804	273.06
61200	17	271.832	271.657	271.259	270.548	269.276	270.915	273.13
61800	17.1667	271.944	271.769	271.37	270.659	269.385	271.025	273.2
62400	17.3333	272.056	271.88	271.482	270.769	269.494	271.136	273.27
63000	17.5	272.167	271.992	271.592	270.879	269.602	271.246	273.339
63600	17.6667	272.279	272.103	271.703	270.988	269.71	271.357	273.407
64200	17.8333	272.39	272.214	271.813	271.098	269.818	271.467	273.475
64800	18	272.501	272.324	271.924	271.207	269.926	271.576	273.543
65400	18.1667	272.611	272.435	272.034	271.316	270.034	271.686	273.611
66000	18.3333	272.722	272.545	272.143	271.425	270.141	271.795	273.678
66600	18.5	272.832	272.655	272.253	271.534	270.248	271.905	273.744
67200	18.6667	272.942	272.765	272.362	271.643	270.355	272.013	273.811
67800	18.8333	273.052	272.875	272.471	271.751	270.462	272.122	273.877
68400	19	273.162	272.984	272.58	271.859	270.569	272.231	273.942
69000	19.1667	273.271	273.093	272.689	271.967	270.675	272.339	274.007
69600	19.3333	273.38	273.202	272.798	272.075	270.781	272.447	274.072
70200	19.5	273.489	273.311	272.906	272.182	270.887	272.555	274.136
70800	19.6667	273.598	273.42	273.014	272.289	270.993	272.663	274.2
71400	19.8333	273.707	273.528	273.122	272.397	271.099	272.77	274.264
72000	20	273.815	273.636	273.23	272.503	271.204	272.878	274.327
72600	20.1667	273.923	273.744	273.337	272.61	271.309	272.985	274.39
73200	20.3333	274.031	273.852	273.445	272.717	271.414	273.092	274.453
73800	20.5	274.139	273.96	273.552	272.823	271.519	273.198	274.515
74400	20.6667	274.247	274.067	273.659	272.929	271.624	273.305	274.577
75000	20.8333	274.354	274.174	273.765	273.035	271.728	273.411	274.639
75600	21	274.461	274.281	273.872	273.14	271.832	273.517	274.7
76200	21.1667	274.568	274.388	273.978	273.246	271.936	273.623	274.761
76800	21.3333	274.675	274.494	274.084	273.351	272.04	273.729	274.821
77400	21.5	274.782	274.601	274.19	273.456	272.143	273.834	274.881
78000	21.6667	274.888	274.707	274.296	273.561	272.247	273.94	274.941
78600	21.8333	274.994	274.813	274.401	273.665	272.35	274.045	275.001
79200	22	275.1	274.918	274.506	273.77	272.453	274.149	275.06
79800	22.1667	275.206	275.024	274.611	273.874	272.555	274.254	275.119
80400	22.3333	275.311	275.129	274.716	273.978	272.658	274.359	275.177
81000	22.5	275.416	275.234	274.821	274.082	272.76	274.463	275.235
81600	22.6667	275.522	275.339	274.925	274.185	272.862	274.567	275.293
82200	22.8333	275.626	275.444	275.029	274.289	272.964	274.671	275.35
82800	23	275.731	275.548	275.134	274.392	273.066	274.774	275.407
83400	23.1667	275.836	275.653	275.237	274.495	273.168	274.878	275.464
84000	23.3333	275.94	275.757	275.341	274.598	273.269	274.981	275.521
84600	23.5	276.044	275.861	275.444	274.7	273.37	275.084	275.577
85200	23.6667	276.148	275.964	275.548	274.803	273.471	275.187	275.633
85800	23.8333	276.252	276.068	275.651	274.905	273.572	275.289	275.688
86400	24	276.355	276.171	275.753	275.007	273.672	275.392	275.743
87000	24.1667	276.458	276.274	275.856	275.109	273.773	275.494	275.798
87600	24.3333	276.561	276.377	275.958	275.21	273.873	275.596	275.853
88200	24.5	276.664	276.48	276.061	275.312	273.973	275.698	275.907
88800	24.6667	276.767	276.582	276.163	275.413	274.072	275.799	275.961
89400	24.8333	276.869	276.684	276.264	275.514	274.172	275.901	276.015
90000	25	276.972	276.786	276.366	275.615	274.271	276.002	276.068
90600	25.1667	277.074	276.888	276.467	275.715	274.37	276.103	276.121
91200	25.3333	277.176	276.99	276.568	275.816	274.469	276.204	276.174
91800	25.5	277.277	277.091	276.669	275.916	274.568	276.304	276.226
92400	25.6667	277.379	277.193	276.77	276.016	274.666	276.405	276.279
93000	25.8333	277.48	277.294	276.871	276.115	274.765	276.505	276.33
93600	26	277.581	277.395	276.971	276.215	274.863	276.605	276.382
94200	26.1667	277.682	277.495	277.071	276.314	274.961	276.705	276.433
94800	26.3333	277.782	277.596	277.171	276.414	275.059	276.804	276.484
95400	26.5	277.883	277.696	277.271	276.513	275.156	276.904	276.535
96000	26.6667	277.983	277.796	277.371	276.611	275.254	277.003	276.585
96600	26.8333	278.083	277.896	277.47	276.71	275.351	277.102	276.635
97200	27	278.183	277.995	277.569	276.808	275.448	277.201	276.685
97800	27.1667	278.283	278.095	277.668	276.906	275.544	277.299	276.735
98400	27.3333	278.382	278.194	277.767	277.004	275.641	277.398	276.784
99000	27.5	278.481	278.293	277.866	277.102	275.737	277.496	276.833
99600	27.6667	278.58	278.392	277.964	277.2	275.834	277.594	276.882
100200	27.8333	278.679	278.491	278.062	277.297	275.93	277.692	276.93
100800	28	278.778	278.589	278.16	277.394	276.025	277.789	276.978
101400	28.1667	278.876	278.687	278.258	277.491	276.121	277.887	277.026
102000	28.3333	278.975	278.785	278.356	277.588	276.216	277.984	277.074
102600	28.5	279.073	278.883	278.453	277.685	276.312	278.081	277.121
103200	28.6667	279.171	278.981	278.55	277.781	276.407	278.178	277.168
103800	28.8333	279.268	279.078	278.647	277.878	276.501	278.275	277.215
104400	29	279.366	279.176	278.744	277.974	276.596	278.371	277.262
105000	29.1667	279.463	279.273	278.841	278.069	276.69	278.467	277.308
105600	29.3333	279.56	279.37	278.937	278.165	276.785	278.563	277.354
106200	29.5	279.657	279.466	279.033	278.261	276.879	278.659	277.4
106800	29.6667	279.754	279.563	279.13	278.356	276.973	278.755	277.446
107400	29.8333	279.85	279.659	279.225	278.451	277.066	278.85	277.491
108000	30	279.946	279.755	279.321	278.546	277.16	278.946	277.536
108600	30.1667	280.043	279.851	279.417	278.64	277.253	279.041	277.581
109200	30.3333	280.138	279.947	279.512	278.735	277.346	279.136	277.625
109800	30.5	280.234	280.042	279.607	278.829	277.439	279.23	277.67
110400	30.6667	280.33	280.138	279.702	278.923	277.532	279.325	277.714
111000	30.8333	280.425	280.233	279.796	279.017	277.624	279.419	277.757
111600	31	280.52	280.328	279.891	279.111	277.717	279.513	277.801
112200	31.1667	280.615	280.422	279.985	279.204	277.809	279.607	277.844
112800	31.3333	280.71	280.517	280.079	279.298	277.901	279.701	277.887
113400	31.5	280.804	280.611	280.173	279.391	277.993	279.795	277.93
114000	31.6667	280.899	280.706	280.267	279.484	278.084	279.888	277.973
114600	31.8333	280.993	280.8	280.361	279.577	278.176	279.981	278.015
115200	32	281.087	280.893	280.454	279.669	278.267	280.074	278.057
115800	32.1667	281.181	280.987	280.547	279.762	278.358	280.167	278.099
116400	32.3333	281.274	281.08	280.64	279.854	278.449	280.259	278.141
117000	32.5	281.368	281.174	280.733	279.946	278.539	280.352	278.182
117600	32.6667	281.461	281.267	280.825	280.038	278.63	280.444	278.223
118200	32.8333	281.554	281.359	280.918	280.129	278.72	280.536	278.264
118800	33	281.647	281.452	281.01	280.221	278.81	280.628	278.305
119400	33.1667	281.74	281.545	281.102	280.312	278.9	280.72	278.345
120000	33.3333	281.832	281.637	281.194	280.403	278.99	280.811	278.386
120600	33.5	281.924	281.729	281.286	280.494	279.079	280.902	278.426
121200	33.6667	282.016	281.821	281.377	280.585	279.169	280.994	278.466
121800	33.8333	282.108	281.913	281.468	280.675	279.258	281.084	278.505
122400	34	282.2	282.004	281.559	280.766	279.347	281.175	278.545
123000	34.1667	282.292	282.095	281.65	280.856	279.436	281.266	278.584
123600	34.3333	282.383	282.187	281.741	280.946	279.524	281.356	278.623
124200	34.5	282.474	282.277	281.832	281.035	279.613	281.446	278.662
124800	34.6667	282.565	282.368	281.922	281.125	279.701	281.536	278.7
125400	34.8333	282.656	282.459	282.012	281.215	279.789	281.626	278.739
126000	35	282.746	282.549	282.102	281.304	279.877	281.716	278.777
126600	35.1667	282.837	282.639	282.192	281.393	279.965	281.805	278.815
127200	35.3333	282.927	282.73	282.281	281.482	280.052	281.894	278.852
127800	35.5	283.017	282.819	282.371	281.57	280.14	281.983	278.89
128400	35.6667	283.107	282.909	282.46	281.659	280.227	282.072	278.927
129000	35.8333	283.197	282.998	282.549	281.747	280.314	282.161	278.964
129600	36	283.286	283.088	282.638	281.835	280.4	282.249	279.001
130200	36.1667	283.375	283.177	282.727	281.923	280.487	282.338	279.038
130800	36.3333	283.464	283.266	282.815	282.011	280.573	282.426	279.075
131400	36.5	283.553	283.354	282.903	282.098	280.66	282.514	279.111
132000	36.6667	283.642	283.443	282.991	282.186	280.746	282.601	279.147
132600	36.8333	283.73	283.531	283.079	282.273	280.831	282.689	279.183
133200	37	283.819	283.619	283.167	282.36	280.917	282.776	279.219
133800	37.1667	283.907	283.707	283.254	282.446	281.002	282.863	279.254
134400	37.3333	283.995	283.795	283.342	282.533	281.088	282.95	279.29
135000	37.5	284.082	283.882	283.429	282.619	281.173	283.037	279.325
135600	37.6667	284.17	283.97	283.516	282.706	281.257	283.124	279.36
136200	37.8333	284.257	284.057	283.603	282.792	281.342	283.21	279.395
136800	38	284.344	284.144	283.689	282.877	281.427	283.296	279.429
137400	38.1667	284.431	284.231	283.775	282.963	281.511	283.382	279.464
138000	38.3333	284.518	284.317	283.862	283.048	281.595	283.468	279.498
138600	38.5	284.605	284.404	283.948	283.134	281.679	283.554	279.532
139200	38.6667	284.691	284.49	284.033	283.219	281.763	283.639	279.566
139800	38.8333	284.777	284.576	284.119	283.304	281.846	283.724	279.6
140400	39	284.863	284.662	284.204	283.388	281.93	283.81	279.634
141000	39.1667	284.949	284.747	284.29	283.473	282.013	283.894	279.667
141600	39.3333	285.035	284.833	284.375	283.557	282.096	283.979	279.7
142200	39.5	285.12	284.918	284.46	283.641	282.179	284.064	279.734
142800	39.6667	285.206	285.003	284.544	283.725	282.261	284.148	279.767
143400	39.8333	285.291	285.088	284.629	283.809	282.344	284.232	279.799
144000	40	285.376	285.173	284.713	283.893	282.426	284.316	279.832
144600	40.1667	285.46	285.257	284.797	283.976	282.508	284.4	279.864
145200	40.3333	285.545	285.342	284.881	284.059	282.59	284.484	279.897
145800	40.5	285.629	285.426	284.965	284.142	282.672	284.567	279.929
146400	40.6667	285.713	285.51	285.049	284.225	282.754	284.65	279.961
147000	40.8333	285.797	285.594	285.132	284.308	282.835	284.733	279.993
147600	41	285.881	285.677	285.215	284.391	282.916	284.816	280.025
148200	41.1667	285.965	285.761	285.298	284.473	282.997	284.899	280.056
148800	41.3333	286.048	285.844	285.381	284.555	283.078	284.981	280.088
149400	41.5	286.132	285.927	285.464	284.637	283.159	285.064	280.119
150000	41.6667	286.215	286.01	285.546	284.719	283.24	285.146	280.15
150600	41.8333	286.298	286.093	285.629	284.801	283.32	285.228	280.181
151200	42	286.38	286.175	285.711	284.882	283.4	285.31	280.212
151800	42.1667	286.463	286.258	285.793	284.963	283.48	285.391	280.243
152400	42.3333	286.545	286.34	285.875	285.044	283.56	285.473	280.273
153000	42.5	286.628	286.422	285.956	285.125	283.64	285.554	280.304
153600	42.6667	286.71	286.504	286.038	285.206	283.719	285.635	280.334
154200	42.8333	286.791	286.586	286.119	285.287	283.798	285.716	280.364
154800	43	286.873	286.667	286.2	285.367	283.878	285.797	280.394
155400	43.1667	286.955	286.748	286.281	285.447	283.957	285.878	280.424
156000	43.3333	287.036	286.83	286.362	285.527	284.035	285.958	280.454
156600	43.5	287.117	286.911	286.442	285.607	284.114	286.038	280.483
157200	43.6667	287.198	286.991	286.523	285.687	284.193	286.118	280.513
157800	43.8333	287.279	287.072	286.603	285.766	284.271	286.198	280.542
158400	44	287.36	287.152	286.683	285.846	284.349	286.278	280.571
159000	44.1667	287.44	287.233	286.763	285.925	284.427	286.358	280.6
159600	44.3333	287.52	287.313	286.843	286.004	284.505	286.437	280.629
160200	44.5	287.6	287.393	286.922	286.083	284.582	286.516	280.658
160800	44.6667	287.68	287.472	287.002	286.162	284.66	286.595	280.687
161400	44.8333	287.76	287.552	287.081	286.24	284.737	286.674	280.715
162000	45	287.84	287.631	287.16	286.318	284.814	286.753	280.744
162600	45.1667	287.919	287.711	287.239	286.397	284.891	286.831	280.772
163200	45.3333	287.998	287.79	287.317	286.475	284.968	286.91	280.8
163800	45.5	288.077	287.869	287.396	286.552	285.045	286.988	280.829
164400	45.6667	288.156	287.947	287.474	286.63	285.121	287.066	280.856
165000	45.8333	288.235	288.026	287.552	286.708	285.197	287.144	280.884
165600	46	288.313	288.104	287.63	286.785	285.273	287.221	280.912
166200	46.1667	288.392	288.182	287.708	286.862	285.349	287.299	280.94
166800	46.3333	288.47	288.26	287.786	286.939	285.425	287.376	280.967
167400	46.5	288.548	288.338	287.863	287.016	285.501	287.453	280.994
168000	46.6667	288.626	288.416	287.941	287.093	285.576	287.53	281.022
168600	46.8333	288.704	288.494	288.018	287.169	285.651	287.607	281.049
169200	47	288.781	288.571	288.095	287.245	285.727	287.684	281.076
169800	47.1667	288.859	288.648	288.172	287.322	285.802	287.76	281.103
170400	47.3333	288.936	288.725	288.248	287.398	285.876	287.837	281.129
171000	47.5	289.013	288.802	288.325	287.473	285.951	287.913	281.156
171600	47.6667	289.09	288.879	288.401	287.549	286.026	287.989	281.182
172200	47.8333	289.166	288.955	288.477	287.625	286.1	288.065	281.209
172800	48	289.243	289.032	288.553	287.7	286.174	288.14	281.235
173400	48.1667	289.319	289.108	288.629	287.775	286.248	288.216	281.261
174000	48.3333	289.396	289.184	288.705	287.85	286.322	288.291	281.287
174600	48.5	289.472	289.26	288.78	287.925	286.396	288.366	281.313
175200	48.6667	289.547	289.335	288.856	288	286.469	288.441	281.339
175800	48.8333	289.623	289.411	288.931	288.074	286.542	288.516	281.365
176400	49	289.699	289.486	289.006	288.149	286.616	288.591	281.391
177000	49.1667	289.774	289.562	289.081	288.223	286.689	288.666	281.416
177600	49.3333	289.849	289.637	289.155	288.297	286.762	288.74	281.441
178200	49.5	289.924	289.712	289.23	288.371	286.834	288.814	281.467
178800	49.6667	289.999	289.786	289.304	288.444	286.907	288.888	281.492
179400	49.8333	290.074	289.861	289.379	288.518	286.979	288.962	281.517
180000	50	290.149	289.935	289.453	288.591	287.052	289.036	281.542
180600	50.1667	290.223	290.01	289.526	288.665	287.124	289.109	281.567
181200	50.3333	290.297	290.084	289.6	288.738	287.196	289.183	281.592
181800	50.5	290.371	290.158	289.674	288.811	287.267	289.256	281.616
182400	50.6667	290.445	290.231	289.747	288.883	287.339	289.329	281.641
183000	50.8333	290.519	290.305	289.82	288.956	287.41	289.402	281.665
183600	51	290.593	290.378	289.893	289.028	287.482	289.475	281.69
184200	51.1667	290.666	290.452	289.966	289.101	287.553	289.548	281.714
184800	51.3333	290.739	290.525	290.039	289.173	287.624	289.62	281.738
185400	51.5	290.813	290.598	290.112	289.245	287.695	289.692	281.762
186000	51.6667	290.886	290.671	290.184	289.317	287.766	289.765	281.786
186600	51.8333	290.958	290.743	290.257	289.388	287.836	289.837	281.81
187200	52	291.031	290.816	290.329	289.46	287.907	289.908	281.834
187800	52.1667	291.104	290.888	290.401	289.531	287.977	289.98	281.857
188400	52.3333	291.176	290.96	290.473	289.603	288.047	290.052	281.881
189000	52.5	291.248	291.032	290.544	289.674	288.117	290.123	281.904
189600	52.6667	291.32	291.104	290.616	289.745	288.187	290.194	281.928
190200	52.8333	291.392	291.176	290.687	289.815	288.256	290.265	281.951
190800	53	291.464	291.247	290.758	289.886	288.326	290.336	281.974
191400	53.1667	291.535	291.319	290.829	289.956	288.395	290.407	281.997
192000	53.3333	291.607	291.39	290.9	290.027	288.464	290.478	282.02
192600	53.5	291.678	291.461	290.971	290.097	288.533	290.548	282.043
193200	53.6667	291.749	291.532	291.042	290.167	288.602	290.618	282.066
193800	53.8333	291.82	291.603	291.112	290.237	288.671	290.689	282.089
194400	54	291.891	291.674	291.182	290.306	288.74	290.759	282.111
195000	54.1667	291.962	291.744	291.253	290.376	288.808	290.828	282.134
195600	54.3333	292.032	291.814	291.323	290.445	288.876	290.898	282.156
196200	54.5	292.102	291.885	291.392	290.515	288.945	290.968	282.179
196800	54.6667	292.173	291.955	291.462	290.584	289.013	291.037	282.201
197400	54.8333	292.243	292.025	291.532	290.653	289.08	291.106	282.223
198000	55	292.313	292.094	291.601	290.721	289.148	291.176	282.245
198600	55.1667	292.382	292.164	291.67	290.79	289.216	291.244	282.267
199200	55.3333	292.452	292.233	291.74	290.859	289.283	291.313	282.289
199800	55.5	292.521	292.303	291.808	290.927	289.35	291.382	282.311
200400	55.6667	292.591	292.372	291.877	290.995	289.418	291.451	282.333
201000	55.8333	292.66	292.441	291.946	291.063	289.485	291.519	282.354
201600	56	292.729	292.51	292.014	291.131	289.552	291.587	282.376
202200	56.1667	292.798	292.578	292.083	291.199	289.618	291.655	282.397
202800	56.3333	292.866	292.647	292.151	291.267	289.685	291.723	282.419
203400	56.5	292.935	292.715	292.219	291.334	289.751	291.791	282.44
204000	56.6667	293.003	292.784	292.287	291.401	289.818	291.859	282.461
204600	56.8333	293.072	292.852	292.355	291.469	289.884	291.926	282.483
205200	57	293.14	292.92	292.422	291.536	289.95	291.993	282.504
205800	57.1667	293.208	292.988	292.49	291.603	290.016	292.061	282.525
206400	57.3333	293.276	293.055	292.557	291.669	290.081	292.128	282.546
207000	57.5	293.343	293.123	292.625	291.736	290.147	292.195	282.566
207600	57.6667	293.411	293.19	292.692	291.802	290.212	292.261	282.587
208200	57.8333	293.478	293.257	292.759	291.869	290.278	292.328	282.608
208800	58	293.545	293.325	292.825	291.935	290.343	292.395	282.629
209400	58.1667	293.613	293.391	292.892	292.001	290.408	292.461	282.649
210000	58.3333	293.68	293.458	292.958	292.067	290.473	292.527	282.67
210600	58.5	293.746	293.525	293.025	292.133	290.537	292.593	282.69
211200	58.6667	293.813	293.592	293.091	292.198	290.602	292.659	282.71
211800	58.8333	293.88	293.658	293.157	292.264	290.667	292.725	282.73
212400	59	293.946	293.724	293.223	292.329	290.731	292.791	282.751
213000	59.1667	294.012	293.79	293.289	292.395	290.795	292.856	282.771
213600	59.3333	294.078	293.856	293.354	292.46	290.859	292.922	282.791
214200	59.5	294.144	293.922	293.42	292.525	290.923	292.987	282.811
214800	59.6667	294.21	293.988	293.485	292.589	290.987	293.052	282.831
215400	59.8333	294.276	294.053	293.551	292.654	291.051	293.117	282.85
216000	60	294.342	294.119	293.616	292.719	291.114	293.182	282.87
216600	60.1667	294.407	294.184	293.681	292.783	291.178	293.246	282.89
217200	60.3333	294.472	294.249	293.745	292.847	291.241	293.311	282.909
217800	60.5	294.537	294.314	293.81	292.911	291.304	293.375	282.929
218400	60.6667	294.602	294.379	293.875	292.975	291.367	293.44	282.948
219000	60.8333	294.667	294.444	293.939	293.039	291.43	293.504	282.968
219600	61	294.732	294.508	294.003	293.103	291.492	293.568	282.987
220200	61.1667	294.797	294.573	294.068	293.167	291.555	293.632	283.006
220800	61.3333	294.861	294.637	294.132	293.23	291.618	293.695	283.025
221400	61.5	294.925	294.701	294.195	293.293	291.68	293.759	283.044
222000	61.6667	294.99	294.765	294.259	293.356	291.742	293.823	283.063
222600	61.8333	295.054	294.829	294.323	293.42	291.804	293.886	283.082
223200	62	295.118	294.893	294.386	293.482	291.866	293.949	283.101
223800	62.1667	295.181	294.957	294.45	293.545	291.928	294.012	283.12
224400	62.3333	295.245	295.02	294.513	293.608	291.99	294.075	283.139
225000	62.5	295.309	295.084	294.576	293.67	292.051	294.138	283.158
225600	62.6667	295.372	295.147	294.639	293.733	292.113	294.201	283.176
226200	62.8333	295.435	295.21	294.702	293.795	292.174	294.263	283.195
226800	63	295.498	295.273	294.764	293.857	292.235	294.326	283.213
227400	63.1667	295.561	295.336	294.827	293.919	292.296	294.388	283.232
228000	63.3333	295.624	295.398	294.889	293.981	292.357	294.45	283.25
228600	63.5	295.687	295.461	294.951	294.043	292.418	294.512	283.269
229200	63.6667	295.749	295.523	295.014	294.104	292.478	294.574	283.287
229800	63.8333	295.812	295.586	295.076	294.166	292.539	294.636	283.305
230400	64	295.874	295.648	295.137	294.227	292.599	294.697	283.323
231000	64.1667	295.936	295.71	295.199	294.289	292.66	294.759	283.341
231600	64.3333	295.998	295.772	295.261	294.35	292.72	294.82	283.359
232200	64.5	296.06	295.834	295.322	294.411	292.78	294.881	283.377
232800	64.6667	296.122	295.895	295.384	294.471	292.84	294.943	283.395
233400	64.8333	296.184	295.957	295.445	294.532	292.9	295.004	283.413
234000	65	296.245	296.018	295.506	294.593	292.959	295.064	283.431
234600	65.1667	296.307	296.08	295.567	294.653	293.019	295.125	283.448
235200	65.3333	296.368	296.141	295.628	294.714	293.078	295.186	283.466
235800	65.5	296.429	296.202	295.689	294.774	293.137	295.246	283.484
236400	65.6667	296.49	296.263	295.749	294.834	293.197	295.307	283.501
237000	65.8333	296.551	296.324	295.81	294.894	293.256	295.367	283.519
237600	66	296.612	296.384	295.87	294.954	293.315	295.427	283.536
238200	66.1667	296.673	296.445	295.93	295.013	293.373	295.487	283.554
238800	66.3333	296.733	296.505	295.99	295.073	293.432	295.547	283.571
239400	66.5	296.794	296.565	296.05	295.132	293.491	295.607	283.588
240000	66.6667	296.854	296.626	296.11	295.192	293.549	295.666	283.605
240600	66.8333	296.914	296.686	296.17	295.251	293.607	295.726	283.623
241200	67	296.974	296.745	296.23	295.31	293.665	295.785	283.64
241800	67.1667	297.034	296.805	296.289	295.369	293.724	295.844	283.657
242400	67.3333	297.094	296.865	296.348	295.428	293.781	295.903	283.674
243000	67.5	297.154	296.924	296.408	295.487	293.839	295.962	283.691
243600	67.6667	297.213	296.984	296.467	295.545	293.897	296.021	283.708
244200	67.8333	297.273	297.043	296.526	295.604	293.955	296.08	283.725
244800	68	297.332	297.102	296.585	295.662	294.012	296.139	283.741
245400	68.1667	297.391	297.161	296.643	295.721	294.069	296.197	283.758
246000	68.3333	297.45	297.22	296.702	295.779	294.127	296.256	283.775
246600	68.5	297.509	297.279	296.761	295.837	294.184	296.314	283.791
247200	68.6667	297.568	297.338	296.819	295.895	294.241	296.372	283.808
247800	68.8333	297.626	297.396	296.877	295.952	294.298	296.43	283.825
248400	69	297.685	297.455	296.935	296.01	294.355	296.488	283.841
249000	69.1667	297.744	297.513	296.993	296.068	294.411	296.546	283.857
249600	69.3333	297.802	297.571	297.051	296.125	294.468	296.603	283.874
250200	69.5	297.86	297.629	297.109	296.182	294.524	296.661	283.89
250800	69.6667	297.918	297.687	297.167	296.239	294.581	296.718	283.906
251400	69.8333	297.976	297.745	297.224	296.297	294.637	296.776	283.923
252000	70	298.034	297.803	297.282	296.354	294.693	296.833	283.939
252600	70.1667	298.092	297.86	297.339	296.41	294.749	296.89	283.955
253200	70.3333	298.149	297.918	297.396	296.467	294.805	296.947	283.971
253800	70.5	298.207	297.975	297.454	296.524	294.86	297.004	283.987
254400	70.6667	298.264	298.033	297.511	296.58	294.916	297.061	284.003
255000	70.8333	298.322	298.09	297.567	296.637	294.972	297.117	284.019
255600	71	298.379	298.147	297.624	296.693	295.027	297.174	284.035
256200	71.1667	298.436	298.204	297.681	296.749	295.082	297.23	284.052
256800	71.3333	298.493	298.26	297.737	296.805	295.137	297.286	284.069
257400	71.5	298.549	298.317	297.794	296.861	295.192	297.343	284.086
258000	71.6667	298.606	298.374	297.85	296.916	295.247	297.398	284.104
258600	71.8333	298.662	298.43	297.906	296.972	295.301	297.454	284.123
259200	72	298.719	298.486	297.962	297.027	295.356	297.51	284.142
259800	72.1667	298.775	298.542	298.018	297.083	295.41	297.566	284.161
260400	72.3333	298.831	298.598	298.073	297.138	295.464	297.621	284.181
261000	72.5	298.887	298.654	298.129	297.193	295.518	297.676	284.202
261600	72.6667	298.943	298.71	298.184	297.248	295.572	297.731	284.223
262200	72.8333	298.998	298.765	298.239	297.302	295.626	297.786	284.245
262800	73	299.054	298.82	298.295	297.357	295.68	297.841	284.267
263400	73.1667	299.109	298.876	298.349	297.412	295.733	297.896	284.289
264000	73.3333	299.164	298.931	298.404	297.466	295.787	297.95	284.312
264600	73.5	299.219	298.986	298.459	297.52	295.84	298.005	284.336
265200	73.6667	299.274	299.04	298.514	297.574	295.893	298.059	284.36
265800	73.8333	299.329	299.095	298.568	297.628	295.946	298.113	284.384
266400	74	299.384	299.15	298.622	297.682	295.999	298.167	284.409
267000	74.1667	299.438	299.204	298.676	297.735	296.051	298.221	284.435
267600	74.3333	299.492	299.258	298.73	297.789	296.104	298.275	284.461
268200	74.5	299.547	299.312	298.784	297.842	296.157	298.328	284.488
268800	74.6667	299.601	299.366	298.838	297.895	296.209	298.382	284.515
269400	74.8333	299.655	299.42	298.892	297.949	296.261	298.435	284.542
270000	75	299.709	299.474	298.945	298.002	296.313	298.488	284.57
270600	75.1667	299.762	299.528	298.998	298.054	296.365	298.542	284.599
271200	75.3333	299.816	299.581	299.052	298.107	296.417	298.594	284.628
271800	75.5	299.869	299.634	299.105	298.16	296.469	298.647	284.657
272400	75.6667	299.922	299.688	299.158	298.212	296.52	298.7	284.687
273000	75.8333	299.976	299.741	299.21	298.264	296.572	298.753	284.718
273600	76	300.029	299.794	299.263	298.317	296.623	298.805	284.749
274200	76.1667	300.082	299.846	299.316	298.369	296.674	298.857	284.78
274800	76.3333	300.134	299.899	299.368	298.421	296.725	298.909	284.812
275400	76.5	300.187	299.952	299.42	298.472	296.776	298.961	284.844
276000	76.6667	300.239	300.004	299.472	298.524	296.827	299.013	284.877
276600	76.8333	300.292	300.056	299.524	298.576	296.877	299.065	284.91
277200	77	300.344	300.108	299.576	298.627	296.928	299.117	284.944
277800	77.1667	300.396	300.16	299.628	298.678	296.978	299.168	284.978
278400	77.3333	300.448	300.212	299.68	298.73	297.029	299.22	285.013
279000	77.5	300.5	300.264	299.731	298.781	297.079	299.271	285.048
279600	77.6667	300.552	300.316	299.783	298.832	297.129	299.322	285.084
280200	77.8333	300.603	300.367	299.834	298.882	297.179	299.373	285.12
280800	78	300.655	300.419	299.885	298.933	297.229	299.424	285.156
281400	78.1667	300.706	300.47	299.936	298.984	297.278	299.475	285.193
282000	78.3333	300.757	300.521	299.987	299.034	297.328	299.525	285.23
282600	78.5	300.808	300.572	300.038	299.084	297.377	299.576	285.268
283200	78.6667	300.859	300.623	300.088	299.135	297.427	299.626	285.306
283800	78.8333	300.91	300.674	300.139	299.185	297.476	299.677	285.345
284400	79	300.961	300.724	300.189	299.235	297.525	299.727	285.384
285000	79.1667	301.012	300.775	300.24	299.284	297.574	299.777	285.423
285600	79.3333	301.062	300.825	300.29	299.334	297.623	299.827	285.463
286200	79.5	301.112	300.875	300.34	299.384	297.672	299.877	285.503
286800	79.6667	301.163	300.926	300.39	299.433	297.72	299.926	285.544
287400	79.8333	301.213	300.976	300.439	299.482	297.769	299.976	285.585
288000	80	301.263	301.025	300.489	299.532	297.817	300.025	285.627
288600	80.1667	301.313	301.075	300.539	299.581	297.866	300.075	285.668
289200	80.3333	301.362	301.125	300.588	299.63	297.914	300.124	285.711
289800	80.5	301.412	301.174	300.637	299.679	297.962	300.173	285.753
290400	80.6667	301.461	301.224	300.687	299.727	298.01	300.222	285.796
291000	80.8333	301.511	301.273	300.736	299.776	298.057	300.271	285.84
291600	81	301.56	301.322	300.785	299.824	298.105	300.319	285.883
292200	81.1667	301.609	301.371	300.833	299.873	298.153	300.368	285.927
292800	81.3333	301.658	301.42	300.882	299.921	298.2	300.416	285.972
293400	81.5	301.707	301.469	300.931	299.969	298.248	300.465	286.017
294000	81.6667	301.756	301.518	300.979	300.017	298.295	300.513	286.062
294600	81.8333	301.805	301.566	301.028	300.065	298.342	300.561	286.107
295200	82	301.853	301.615	301.076	300.113	298.389	300.609	286.153
295800	82.1667	301.902	301.663	301.124	300.161	298.436	300.657	286.199
296400	82.3333	301.95	301.712	301.172	300.208	298.483	300.705	286.246
297000	82.5	301.998	301.76	301.22	300.256	298.529	300.753	286.293
297600	82.6667	302.046	301.808	301.268	300.303	298.576	300.8	286.34
298200	82.8333	302.094	301.856	301.315	300.351	298.622	300.848	286.387
298800	83	302.142	301.903	301.363	300.398	298.669	300.895	286.435
299400	83.1667	302.19	301.951	301.41	300.445	298.715	300.942	286.483
300000	83.3333	302.238	301.999	301.458	300.492	298.761	300.989	286.532
300600	83.5	302.285	302.046	301.505	300.538	298.807	301.036	286.581
301200	83.6667	302.332	302.093	301.552	300.585	298.853	301.083	286.63
301800	83.8333	302.38	302.141	301.599	300.632	298.899	301.13	286.679
302400	84	302.427	302.188	301.646	300.678	298.945	301.177	286.729
303000	84.1667	302.474	302.235	301.693	300.725	298.99	301.223	286.779
303600	84.3333	302.521	302.282	301.739	300.771	299.036	301.27	286.829
304200	84.5	302.568	302.328	301.786	300.817	299.081	301.316	286.88
304800	84.6667	302.615	302.375	301.832	300.863	299.126	301.362	286.931
305400	84.8333	302.661	302.422	301.879	300.909	299.172	301.408	286.982
306000	85	302.708	302.468	301.925	300.955	299.217	301.454	287.034
306600	85.1667	302.754	302.514	301.971	301	299.262	301.5	287.086
307200	85.3333	302.8	302.56	302.017	301.046	299.306	301.546	287.138
307800	85.5	302.847	302.607	302.063	301.092	299.351	301.592	287.19
308400	85.6667	302.893	302.653	302.109	301.137	299.396	301.637	287.243
309000	85.8333	302.939	302.698	302.154	301.182	299.44	301.683	287.296
309600	86	302.984	302.744	302.2	301.227	299.485	301.728	287.349
310200	86.1667	303.03	302.79	302.245	301.272	299.529	301.773	287.402
310800	86.3333	303.076	302.836	302.291	301.317	299.573	301.819	287.456
311400	86.5	303.121	302.881	302.336	301.362	299.618	301.864	287.51
312000	86.6667	303.167	302.926	302.381	301.407	299.662	301.909	287.564
312600	86.8333	303.212	302.972	302.426	301.452	299.705	301.953	287.619
313200	87	303.257	303.017	302.471	301.496	299.749	301.998	287.674
313800	87.1667	303.302	303.062	302.516	301.541	299.793	302.043	287.729
314400	87.3333	303.348	303.107	302.561	301.585	299.837	302.087	287.784
315000	87.5	303.392	303.152	302.605	301.629	299.88	302.132	287.84
315600	87.6667	303.437	303.196	302.65	301.673	299.924	302.176	287.895
316200	87.8333	303.482	303.241	302.694	301.718	299.967	302.22	287.951
316800	88	303.526	303.285	302.739	301.761	300.01	302.264	288.008
317400	88.1667	303.571	303.33	302.783	301.805	300.053	302.308	288.064
318000	88.3333	303.615	303.374	302.827	301.849	300.096	302.352	288.121
318600	88.5	303.66	303.418	302.871	301.893	300.139	302.396	288.178
319200	88.6667	303.704	303.462	302.915	301.936	300.182	302.44	288.235
319800	88.8333	303.748	303.506	302.959	301.98	300.225	302.484	288.293
320400	89	303.792	303.55	303.003	302.023	300.267	302.527	288.35
321000	89.1667	303.836	303.594	303.046	302.066	300.31	302.57	288.408
321600	89.3333	303.88	303.638	303.09	302.109	300.352	302.614	288.466
322200	89.5	303.923	303.681	303.133	302.152	300.395	302.657	288.525
322800	89.6667	303.967	303.725	303.176	302.195	300.437	302.7	288.583
323400	89.8333	304.01	303.768	303.22	302.238	300.479	302.743	288.642
324000	90	304.054	303.812	303.263	302.281	300.521	302.786	288.701
324600	90.1667	304.097	303.855	303.306	302.324	300.563	302.829	288.76
325200	90.3333	304.14	303.898	303.349	302.366	300.605	302.872	288.82
325800	90.5	304.183	303.941	303.391	302.409	300.647	302.914	288.879
326400	90.6667	304.226	303.984	303.434	302.451	300.688	302.957	288.939
327000	90.8333	304.269	304.027	303.477	302.493	300.73	302.999	288.999
327600	91	304.312	304.069	303.519	302.535	300.772	303.041	289.06
328200	91.1667	304.354	304.112	303.562	302.577	300.813	303.084	289.12
328800	91.3333	304.397	304.155	303.604	302.619	300.854	303.126	289.181
329400	91.5	304.44	304.197	303.646	302.661	300.895	303.168	289.241
330000	91.6667	304.482	304.239	303.688	302.703	300.937	303.21	289.302
330600	91.8333	304.524	304.282	303.731	302.745	300.978	303.252	289.364
331200	92	304.566	304.324	303.772	302.786	301.019	303.294	289.425
331800	92.1667	304.609	304.366	303.814	302.828	301.059	303.335	289.487
332400	92.3333	304.651	304.408	303.856	302.869	301.1	303.377	289.549
333000	92.5	304.692	304.45	303.898	302.911	301.141	303.418	289.61
333600	92.6667	304.734	304.491	303.939	302.952	301.181	303.46	289.673
334200	92.8333	304.776	304.533	303.981	302.993	301.222	303.501	289.735
334800	93	304.818	304.575	304.022	303.034	301.262	303.542	289.797
335400	93.1667	304.859	304.616	304.064	303.075	301.303	303.583	289.86
336000	93.3333	304.901	304.657	304.105	303.116	301.343	303.624	289.923
336600	93.5	304.942	304.699	304.146	303.157	301.383	303.665	289.986
337200	93.6667	304.983	304.74	304.187	303.197	301.423	303.706	290.049
337800	93.8333	305.024	304.781	304.228	303.238	301.463	303.747	290.113
338400	94	305.065	304.822	304.269	303.278	301.503	303.787	290.176
339000	94.1667	305.106	304.863	304.309	303.319	301.543	303.828	290.24
339600	94.3333	305.147	304.904	304.35	303.359	301.582	303.869	290.304
340200	94.5	305.188	304.945	304.391	303.399	301.622	303.909	290.368
340800	94.6667	305.229	304.985	304.431	303.44	301.661	303.949	290.432
341400	94.8333	305.27	305.026	304.472	303.48	301.701	303.989	290.496
342000	95	305.31	305.066	304.512	303.52	301.74	304.03	290.561
342600	95.1667	305.35	305.107	304.552	303.56	301.779	304.07	290.625
343200	95.3333	305.391	305.147	304.592	303.599	301.819	304.11	290.69
343800	95.5	305.431	305.187	304.632	303.639	301.858	304.149	290.755
344400	95.6667	305.471	305.227	304.672	303.679	301.897	304.189	290.82
345000	95.8333	305.511	305.267	304.712	303.718	301.936	304.229	290.885
345600	96	305.551	305.307	304.752	303.758	301.975	304.269	290.951
346200	96.1667	305.591	305.347	304.792	303.797	302.013	304.308	291.016
346800	96.3333	305.631	305.387	304.831	303.836	302.052	304.347	291.082
347400	96.5	305.671	305.427	304.871	303.875	302.091	304.387	291.148
348000	96.6667	305.711	305.466	304.91	303.915	302.129	304.426	291.214
348600	96.8333	305.75	305.506	304.949	303.954	302.167	304.465	291.28
349200	97	305.79	305.545	304.989	303.993	302.206	304.504	291.346
349800	97.1667	305.829	305.584	305.028	304.031	302.244	304.543	291.412
350400	97.3333	305.868	305.624	305.067	304.07	302.282	304.582	291.479
351000	97.5	305.907	305.663	305.106	304.109	302.32	304.621	291.545
351600	97.6667	305.947	305.702	305.145	304.147	302.358	304.66	291.612
352200	97.8333	305.986	305.741	305.184	304.186	302.396	304.699	291.679
352800	98	306.025	305.78	305.223	304.224	302.434	304.737	291.746
353400	98.1667	306.064	305.819	305.261	304.263	302.472	304.776	291.813
354000	98.3333	306.102	305.857	305.3	304.301	302.51	304.814	291.88
354600	98.5	306.141	305.896	305.338	304.339	302.547	304.852	291.948
355200	98.6667	306.18	305.935	305.377	304.377	302.585	304.891	292.015
355800	98.8333	306.218	305.973	305.415	304.415	302.622	304.929	292.083
356400	99	306.257	306.012	305.453	304.453	302.66	304.967	292.151
357000	99.1667	306.295	306.05	305.491	304.491	302.697	305.005	292.218
357600	99.3333	306.333	306.088	305.53	304.529	302.734	305.043	292.286
358200	99.5	306.372	306.126	305.568	304.567	302.771	305.081	292.354
358800	99.6667	306.41	306.164	305.606	304.604	302.808	305.118	292.423
359400	99.8333	306.448	306.202	305.643	304.642	302.845	305.156	292.491
360000	100	306.486	306.24	305.681	304.679	302.882	305.194	292.559
360600	100.167	306.524	306.278	305.719	304.717	302.919	305.231	292.628
361200	100.333	306.562	306.316	305.757	304.754	302.956	305.269	292.696
361800	100.5	306.599	306.354	305.794	304.791	302.992	305.306	292.765
362400	100.667	306.637	306.391	305.832	304.829	303.029	305.343	292.834
363000	100.833	306.675	306.429	305.869	304.866	303.066	305.381	292.903
363600	101	306.712	306.466	305.906	304.903	303.102	305.418	292.972
364200	101.167	306.749	306.504	305.943	304.94	303.138	305.455	293.041
364800	101.333	306.787	306.541	305.981	304.976	303.175	305.492	293.11
365400	101.5	306.824	306.578	306.018	305.013	303.211	305.529	293.179
366000	101.667	306.861	306.615	306.055	305.05	303.247	305.566	293.249
366600	101.833	306.898	306.652	306.092	305.087	303.283	305.602	293.318
367200	102	306.935	306.689	306.128	305.123	303.319	305.639	293.388
367800	102.167	306.972	306.726	306.165	305.16	303.355	305.676	293.458
368400	102.333	307.009	306.763	306.202	305.196	303.391	305.712	293.527
369000	102.5	307.046	306.8	306.238	305.232	303.427	305.749	293.597
369600	102.667	307.083	306.836	306.275	305.269	303.462	305.785	293.667
370200	102.833	307.119	306.873	306.311	305.305	303.498	305.821	293.737
370800	103	307.156	306.91	306.348	305.341	303.534	305.858	293.807
371400	103.167	307.192	306.946	306.384	305.377	303.569	305.894	293.878
372000	103.333	307.229	306.982	306.42	305.413	303.604	305.93	293.948
372600	103.5	307.265	307.019	306.457	305.449	303.64	305.966	294.018
373200	103.667	307.301	307.055	306.493	305.484	303.675	306.002	294.089
373800	103.833	307.338	307.091	306.529	305.52	303.71	306.038	294.159
374400	104	307.374	307.127	306.565	305.556	303.745	306.073	294.23
375000	104.167	307.41	307.163	306.6	305.591	303.781	306.109	294.3
375600	104.333	307.446	307.199	306.636	305.627	303.816	306.145	294.371
376200	104.5	307.482	307.235	306.672	305.662	303.85	306.18	294.442
376800	104.667	307.518	307.271	306.708	305.698	303.885	306.216	294.513
377400	104.833	307.553	307.306	306.743	305.733	303.92	306.251	294.584
378000	105	307.589	307.342	306.779	305.768	303.955	306.287	294.655
378600	105.167	307.625	307.378	306.814	305.804	303.989	306.322	294.726
379200	105.333	307.66	307.413	306.849	305.839	304.024	306.357	294.797
379800	105.5	307.696	307.449	306.885	305.874	304.059	306.392	294.868
380400	105.667	307.731	307.484	306.92	305.909	304.093	306.427	294.94
381000	105.833	307.766	307.519	306.955	305.943	304.127	306.462	295.011
381600	106	307.802	307.554	306.99	305.978	304.162	306.497	295.083
382200	106.167	307.837	307.589	307.025	306.013	304.196	306.532	295.154
382800	106.333	307.872	307.625	307.06	306.048	304.23	306.567	295.226
383400	106.5	307.907	307.66	307.095	306.082	304.264	306.602	295.297
384000	106.667	307.942	307.694	307.13	306.117	304.298	306.636	295.368
384600	106.833	307.977	307.729	307.164	306.151	304.331	306.671	295.439
385200	107	308.012	307.764	307.199	306.185	304.365	306.705	295.509
385800	107.167	308.046	307.799	307.233	306.219	304.399	306.739	295.579
386400	107.333	308.081	307.833	307.268	306.253	304.432	306.774	295.648
387000	107.5	308.116	307.868	307.302	306.287	304.465	306.808	295.717
387600	107.667	308.15	307.902	307.336	306.321	304.498	306.842	295.786
388200	107.833	308.184	307.937	307.371	306.355	304.532	306.876	295.854
388800	108	308.219	307.971	307.405	306.389	304.565	306.909	295.922
389400	108.167	308.253	308.005	307.438	306.422	304.597	306.943	295.99
390000	108.333	308.287	308.039	307.472	306.456	304.63	306.977	296.057
390600	108.5	308.321	308.073	307.506	306.489	304.663	307.01	296.123
391200	108.667	308.355	308.107	307.54	306.522	304.696	307.044	296.19
391800	108.833	308.389	308.141	307.573	306.556	304.728	307.077	296.256
392400	109	308.423	308.174	307.607	306.589	304.761	307.111	296.322
393000	109.167	308.456	308.208	307.64	306.622	304.793	307.144	296.387
393600	109.333	308.49	308.241	307.674	306.655	304.826	307.177	296.452
394200	109.5	308.524	308.275	307.707	306.688	304.858	307.21	296.517
394800	109.667	308.557	308.308	307.74	306.72	304.89	307.243	296.581
395400	109.833	308.59	308.341	307.773	306.753	304.922	307.276	296.645
396000	110	308.624	308.375	307.806	306.786	304.954	307.309	296.709
396600	110.167	308.657	308.408	307.839	306.818	304.986	307.342	296.772
397200	110.333	308.69	308.441	307.872	306.851	305.018	307.374	296.835
397800	110.5	308.723	308.474	307.904	306.883	305.05	307.407	296.898
398400	110.667	308.756	308.506	307.937	306.915	305.081	307.439	296.96
399000	110.833	308.789	308.539	307.97	306.948	305.113	307.472	297.022
399600	111	308.821	308.572	308.002	306.98	305.144	307.504	297.084
400200	111.167	308.854	308.604	308.034	307.012	305.176	307.536	297.145
400800	111.333	308.887	308.637	308.067	307.044	305.207	307.568	297.207
401400	111.5	308.919	308.669	308.099	307.076	305.238	307.6	297.267
402000	111.667	308.951	308.702	308.131	307.107	305.27	307.632	297.328
402600	111.833	308.984	308.734	308.163	307.139	305.301	307.664	297.388
403200	112	309.016	308.766	308.195	307.171	305.332	307.696	297.448
403800	112.167	309.048	308.798	308.227	307.202	305.363	307.728	297.508
404400	112.333	309.08	308.83	308.259	307.234	305.394	307.759	297.567
405000	112.5	309.112	308.862	308.291	307.265	305.424	307.791	297.626
405600	112.667	309.144	308.894	308.322	307.297	305.455	307.822	297.685
406200	112.833	309.176	308.926	308.354	307.328	305.486	307.854	297.743
406800	113	309.208	308.957	308.385	307.359	305.516	307.885	297.801
407400	113.167	309.24	308.989	308.417	307.39	305.547	307.916	297.859
408000	113.333	309.271	309.02	308.448	307.421	305.577	307.948	297.917
408600	113.5	309.303	309.052	308.479	307.452	305.608	307.979	297.974
409200	113.667	309.334	309.083	308.51	307.483	305.638	308.01	298.031
409800	113.833	309.366	309.115	308.542	307.514	305.668	308.041	298.088
410400	114	309.397	309.146	308.573	307.544	305.698	308.072	298.144
411000	114.167	309.428	309.177	308.604	307.575	305.728	308.102	298.2
411600	114.333	309.459	309.208	308.634	307.606	305.758	308.133	298.256
412200	114.5	309.49	309.239	308.665	307.636	305.788	308.164	298.312
412800	114.667	309.521	309.27	308.696	307.667	305.818	308.194	298.367
413400	114.833	309.552	309.301	308.727	307.697	305.848	308.225	298.422
414000	115	309.583	309.331	308.757	307.727	305.877	308.255	298.477
414600	115.167	309.614	309.362	308.788	307.757	305.907	308.286	298.532
415200	115.333	309.644	309.393	308.818	307.787	305.937	308.316	298.586
415800	115.5	309.675	309.423	308.848	307.817	305.966	308.346	298.64
416400	115.667	309.705	309.454	308.879	307.847	305.995	308.376	298.694
417000	115.833	309.736	309.484	308.909	307.877	306.025	308.406	298.747
417600	116	309.766	309.514	308.939	307.907	306.054	308.436	298.801
418200	116.167	309.797	309.545	308.969	307.937	306.083	308.466	298.854
418800	116.333	309.827	309.575	308.999	307.967	306.112	308.496	298.906
419400	116.5	309.857	309.605	309.029	307.996	306.141	308.526	298.959
420000	116.667	309.887	309.635	309.059	308.026	306.17	308.555	299.011
420600	116.833	309.917	309.665	309.089	308.055	306.199	308.585	299.063
421200	117	309.947	309.695	309.118	308.084	306.228	308.615	299.115
421800	117.167	309.977	309.724	309.148	308.114	306.257	308.644	299.167
422400	117.333	310.007	309.754	309.177	308.143	306.286	308.673	299.218
423000	117.5	310.036	309.784	309.207	308.172	306.314	308.703	299.269
423600	117.667	310.066	309.813	309.236	308.201	306.343	308.732	299.32
424200	117.833	310.096	309.843	309.266	308.23	306.371	308.761	299.371
424800	118	310.125	309.872	309.295	308.259	306.4	308.79	299.421
425400	118.167	310.155	309.902	309.324	308.288	306.428	308.819	299.471
426000	118.333	310.184	309.931	309.353	308.317	306.456	308.848	299.521
426600	118.5	310.213	309.96	309.382	308.346	306.485	308.877	299.571
427200	118.667	310.242	309.989	309.411	308.375	306.513	308.906	299.62
427800	118.833	310.272	310.018	309.44	308.403	306.541	308.935	299.67
428400	119	310.301	310.047	309.469	308.432	306.569	308.964	299.719
429000	119.167	310.33	310.076	309.498	308.46	306.597	308.992	299.767
429600	119.333	310.359	310.105	309.527	308.489	306.625	309.021	299.816
430200	119.5	310.387	310.134	309.555	308.517	306.653	309.049	299.864
430800	119.667	310.416	310.163	309.584	308.545	306.68	309.078	299.913
431400	119.833	310.445	310.191	309.612	308.573	306.708	309.106	299.961
432000	120	310.474	310.22	309.641	308.602	306.736	309.134	300.008
432600	120.167	310.502	310.248	309.669	308.63	306.763	309.163	300.056
433200	120.333	310.531	310.277	309.697	308.658	306.791	309.191	300.103
433800	120.5	310.559	310.305	309.726	308.686	306.818	309.219	300.15
434400	120.667	310.588	310.334	309.754	308.714	306.846	309.247	300.197
435000	120.833	310.616	310.362	309.782	308.741	306.873	309.275	300.244
435600	121	310.644	310.39	309.81	308.769	306.9	309.303	300.291
436200	121.167	310.673	310.418	309.838	308.797	306.927	309.331	300.337
436800	121.333	310.701	310.446	309.866	308.824	306.955	309.358	300.383
437400	121.5	310.729	310.474	309.894	308.852	306.982	309.386	300.429
438000	121.667	310.757	310.502	309.921	308.88	307.009	309.414	300.475
438600	121.833	310.785	310.53	309.949	308.907	307.036	309.441	300.52
439200	122	310.813	310.558	309.977	308.934	307.062	309.469	300.566
439800	122.167	310.84	310.586	310.004	308.962	307.089	309.496	300.611
440400	122.333	310.868	310.613	310.032	308.989	307.116	309.524	300.656
441000	122.5	310.896	310.641	310.059	309.016	307.143	309.551	300.701
441600	122.667	310.923	310.669	310.087	309.043	307.169	309.578	300.745
442200	122.833	310.951	310.696	310.114	309.07	307.196	309.605	300.79
442800	123	310.978	310.723	310.141	309.097	307.222	309.633	300.834
443400	123.167	311.006	310.751	310.169	309.124	307.249	309.66	300.878
444000	123.333	311.033	310.778	310.196	309.151	307.275	309.687	300.922
444600	123.5	311.061	310.805	310.223	309.178	307.302	309.714	300.966
445200	123.667	311.088	310.833	310.25	309.205	307.328	309.741	301.009
445800	123.833	311.115	310.86	310.277	309.231	307.354	309.767	301.052
446400	124	311.142	310.887	310.304	309.258	307.38	309.794	301.096
447000	124.167	311.169	310.914	310.331	309.285	307.406	309.821	301.139
447600	124.333	311.196	310.941	310.357	309.311	307.433	309.848	301.181
448200	124.5	311.223	310.967	310.384	309.338	307.458	309.874	301.224
448800	124.667	311.25	310.994	310.411	309.364	307.484	309.901	301.267
449400	124.833	311.277	311.021	310.437	309.39	307.51	309.927	301.309
450000	125	311.304	311.048	310.464	309.417	307.536	309.954	301.351
450600	125.167	311.33	311.074	310.49	309.443	307.562	309.98	301.393
451200	125.333	311.357	311.101	310.517	309.469	307.588	310.006	301.435
451800	125.5	311.383	311.127	310.543	309.495	307.613	310.033	301.477
452400	125.667	311.41	311.154	310.57	309.521	307.639	310.059	301.518
453000	125.833	311.436	311.18	310.596	309.547	307.664	310.085	301.559
453600	126	311.463	311.207	310.622	309.573	307.69	310.111	301.601
454200	126.167	311.489	311.233	310.648	309.599	307.715	310.137	301.642
454800	126.333	311.515	311.259	310.674	309.625	307.741	310.163	301.682
455400	126.5	311.542	311.285	310.7	309.651	307.766	310.189	301.723
456000	126.667	311.568	311.311	310.726	309.676	307.791	310.215	301.764
456600	126.833	311.594	311.337	310.752	309.702	307.816	310.24	301.804
457200	127	311.62	311.363	310.778	309.728	307.842	310.266	301.844
457800	127.167	311.646	311.389	310.804	309.753	307.867	310.292	301.884
458400	127.333	311.672	311.415	310.829	309.779	307.892	310.317	301.924
459000	127.5	311.698	311.441	310.855	309.804	307.917	310.343	301.964
459600	127.667	311.724	311.467	310.881	309.829	307.942	310.368	302.004
460200	127.833	311.749	311.493	310.906	309.855	307.967	310.394	302.043
460800	128	311.775	311.518	310.932	309.88	307.991	310.419	302.083
461400	128.167	311.801	311.544	310.957	309.905	308.016	310.445	302.122
462000	128.333	311.826	311.569	310.983	309.93	308.041	310.47	302.161
462600	128.5	311.852	311.595	311.008	309.956	308.066	310.495	302.2
463200	128.667	311.877	311.62	311.033	309.981	308.09	310.52	302.239
463800	128.833	311.903	311.646	311.059	310.006	308.115	310.545	302.278
464400	129	311.928	311.671	311.084	310.031	308.139	310.571	302.316
465000	129.167	311.953	311.696	311.109	310.055	308.164	310.596	302.354
465600	129.333	311.979	311.721	311.134	310.08	308.188	310.62	302.393
466200	129.5	312.004	311.747	311.159	310.105	308.212	310.645	302.431
466800	129.667	312.029	311.772	311.184	310.13	308.237	310.67	302.469
467400	129.833	312.054	311.797	311.209	310.154	308.261	310.695	302.507
468000	130	312.079	311.822	311.234	310.179	308.285	310.72	302.544
468600	130.167	312.104	311.847	311.259	310.204	308.309	310.745	302.582
469200	130.333	312.129	311.872	311.283	310.228	308.333	310.769	302.619
469800	130.5	312.154	311.896	311.308	310.253	308.358	310.794	302.657
470400	130.667	312.179	311.921	311.333	310.277	308.382	310.818	302.694
471000	130.833	312.204	311.946	311.357	310.302	308.405	310.843	302.731
471600	131	312.228	311.971	311.382	310.326	308.429	310.867	302.768
472200	131.167	312.253	311.995	311.406	310.35	308.453	310.892	302.805
472800	131.333	312.278	312.02	311.431	310.374	308.477	310.916	302.842
473400	131.5	312.302	312.044	311.455	310.399	308.501	310.94	302.878
474000	131.667	312.327	312.069	311.48	310.423	308.525	310.964	302.915
474600	131.833	312.351	312.093	311.504	310.447	308.548	310.989	302.951
475200	132	312.376	312.118	311.528	310.471	308.572	311.013	302.987
475800	132.167	312.4	312.142	311.552	310.495	308.595	311.037	303.023
476400	132.333	312.425	312.166	311.576	310.519	308.619	311.061	303.059
477000	132.5	312.449	312.19	311.601	310.542	308.642	311.085	303.095
477600	132.667	312.473	312.215	311.625	310.566	308.666	311.109	303.131
478200	132.833	312.497	312.239	311.649	310.59	308.689	311.133	303.167
478800	133	312.521	312.263	311.673	310.614	308.713	311.157	303.202
479400	133.167	312.545	312.287	311.696	310.638	308.736	311.18	303.238
480000	133.333	312.569	312.311	311.72	310.661	308.759	311.204	303.273
480600	133.5	312.593	312.335	311.744	310.685	308.782	311.228	303.308
481200	133.667	312.617	312.359	311.768	310.708	308.805	311.251	303.343
481800	133.833	312.641	312.382	311.792	310.732	308.828	311.275	303.378
482400	134	312.665	312.406	311.815	310.755	308.852	311.299	303.413
483000	134.167	312.689	312.43	311.839	310.779	308.875	311.322	303.448
483600	134.333	312.713	312.454	311.862	310.802	308.897	311.346	303.482
484200	134.5	312.736	312.477	311.886	310.825	308.92	311.369	303.517
484800	134.667	312.76	312.501	311.909	310.849	308.943	311.392	303.551
485400	134.833	312.784	312.524	311.933	310.872	308.966	311.416	303.586
486000	135	312.807	312.548	311.956	310.895	308.989	311.439	303.62
486600	135.167	312.831	312.571	311.98	310.918	309.012	311.462	303.654
487200	135.333	312.854	312.595	312.003	310.941	309.034	311.485	303.688
487800	135.5	312.877	312.618	312.026	310.964	309.057	311.509	303.722
488400	135.667	312.901	312.641	312.049	310.987	309.08	311.532	303.756
489000	135.833	312.924	312.665	312.072	311.01	309.102	311.555	303.79
489600	136	312.947	312.688	312.096	311.033	309.125	311.578	303.823
490200	136.167	312.971	312.711	312.119	311.056	309.147	311.601	303.857
490800	136.333	312.994	312.734	312.142	311.079	309.17	311.624	303.89
491400	136.5	313.017	312.757	312.165	311.101	309.192	311.646	303.924
492000	136.667	313.04	312.78	312.188	311.124	309.214	311.669	303.957
492600	136.833	313.063	312.803	312.21	311.147	309.237	311.692	303.99
493200	137	313.086	312.826	312.233	311.169	309.259	311.715	304.023
493800	137.167	313.109	312.849	312.256	311.192	309.281	311.737	304.056
494400	137.333	313.132	312.872	312.279	311.214	309.303	311.76	304.089
495000	137.5	313.155	312.895	312.301	311.237	309.325	311.783	304.122
495600	137.667	313.178	312.918	312.324	311.259	309.347	311.805	304.154
496200	137.833	313.2	312.94	312.347	311.282	309.369	311.828	304.187
496800	138	313.223	312.963	312.369	311.304	309.391	311.85	304.22
497400	138.167	313.246	312.986	312.392	311.327	309.413	311.873	304.252
498000	138.333	313.268	313.008	312.414	311.349	309.435	311.895	304.284
498600	138.5	313.291	313.031	312.437	311.371	309.457	311.917	304.317
499200	138.667	313.314	313.053	312.459	311.393	309.479	311.94	304.349
499800	138.833	313.336	313.076	312.482	311.415	309.501	311.962	304.381
500400	139	313.359	313.098	312.504	311.438	309.523	311.984	304.413
501000	139.167	313.381	313.121	312.526	311.46	309.544	312.006	304.445
501600	139.333	313.403	313.143	312.548	311.482	309.566	312.028	304.477
502200	139.5	313.426	313.165	312.571	311.504	309.588	312.051	304.508
502800	139.667	313.448	313.187	312.593	311.526	309.609	312.073	304.54
503400	139.833	313.47	313.21	312.615	311.548	309.631	312.095	304.572
504000	140	313.493	313.232	312.637	311.569	309.652	312.117	304.603
504600	140.167	313.515	313.254	312.659	311.591	309.674	312.138	304.634
505200	140.333	313.537	313.276	312.681	311.613	309.695	312.16	304.666
505800	140.5	313.559	313.298	312.703	311.635	309.717	312.182	304.697
506400	140.667	313.581	313.32	312.725	311.656	309.738	312.204	304.728
507000	140.833	313.603	313.342	312.747	311.678	309.759	312.226	304.759
507600	141	313.625	313.364	312.768	311.7	309.781	312.248	304.79
508200	141.167	313.647	313.386	312.79	311.721	309.802	312.269	304.821
508800	141.333	313.669	313.408	312.812	311.743	309.823	312.291	304.852
509400	141.5	313.691	313.43	312.834	311.764	309.844	312.312	304.883
510000	141.667	313.712	313.451	312.855	311.786	309.865	312.334	304.914
510600	141.833	313.734	313.473	312.877	311.807	309.886	312.356	304.944
511200	142	313.756	313.495	312.898	311.829	309.907	312.377	304.975
511800	142.167	313.778	313.516	312.92	311.85	309.928	312.398	305.005
512400	142.333	313.799	313.538	312.941	311.871	309.949	312.42	305.035
513000	142.5	313.821	313.559	312.963	311.892	309.969	312.441	305.065
513600	142.667	313.842	313.581	312.984	311.913	309.99	312.462	305.095
514200	142.833	313.864	313.602	313.005	311.934	310.01	312.483	305.124
514800	143	313.885	313.623	313.026	311.955	310.03	312.504	305.154
515400	143.167	313.906	313.645	313.047	311.975	310.05	312.525	305.183
516000	143.333	313.928	313.666	313.068	311.996	310.071	312.546	305.212
516600	143.5	313.949	313.687	313.089	312.017	310.091	312.566	305.24
517200	143.667	313.97	313.708	313.11	312.037	310.111	312.587	305.269
517800	143.833	313.991	313.729	313.131	312.058	310.131	312.608	305.297
518400	144	314.012	313.749	313.151	312.078	310.15	312.628	305.325
519000	144.167	314.033	313.77	313.172	312.098	310.17	312.649	305.353
519600	144.333	314.053	313.791	313.192	312.119	310.19	312.669	305.381
520200	144.5	314.074	313.812	313.213	312.139	310.21	312.689	305.409
520800	144.667	314.095	313.832	313.233	312.159	310.229	312.71	305.436
521400	144.833	314.115	313.853	313.254	312.179	310.249	312.73	305.463
522000	145	314.136	313.873	313.274	312.199	310.268	312.75	305.49
522600	145.167	314.156	313.893	313.294	312.219	310.288	312.77	305.517
523200	145.333	314.177	313.914	313.314	312.239	310.307	312.79	305.544
523800	145.5	314.197	313.934	313.334	312.258	310.326	312.81	305.57
524400	145.667	314.217	313.954	313.354	312.278	310.345	312.83	305.597
525000	145.833	314.237	313.974	313.374	312.298	310.365	312.85	305.623
525600	146	314.258	313.994	313.394	312.317	310.384	312.869	305.649
526200	146.167	314.278	314.014	313.414	312.337	310.403	312.889	305.675
526800	146.333	314.298	314.034	313.433	312.356	310.422	312.909	305.7
527400	146.5	314.318	314.054	313.453	312.376	310.441	312.928	305.726
528000	146.667	314.337	314.074	313.473	312.395	310.459	312.948	305.751
528600	146.833	314.357	314.093	313.492	312.414	310.478	312.967	305.776
529200	147	314.377	314.113	313.512	312.433	310.497	312.986	305.802
529800	147.167	314.397	314.133	313.531	312.453	310.516	313.006	305.826
530400	147.333	314.416	314.152	313.551	312.472	310.534	313.025	305.851
531000	147.5	314.436	314.172	313.57	312.491	310.553	313.044	305.876
531600	147.667	314.455	314.191	313.589	312.51	310.571	313.063	305.9
532200	147.833	314.475	314.21	313.608	312.528	310.59	313.082	305.924
532800	148	314.494	314.23	313.627	312.547	310.608	313.101	305.949
533400	148.167	314.513	314.249	313.646	312.566	310.626	313.12	305.973
534000	148.333	314.533	314.268	313.665	312.585	310.645	313.139	305.996
534600	148.5	314.552	314.287	313.684	312.603	310.663	313.158	306.02
535200	148.667	314.571	314.306	313.703	312.622	310.681	313.177	306.044
535800	148.833	314.59	314.325	313.722	312.641	310.699	313.195	306.067
536400	149	314.609	314.344	313.741	312.659	310.717	313.214	306.09
537000	149.167	314.628	314.363	313.759	312.678	310.735	313.233	306.114
537600	149.333	314.647	314.382	313.778	312.696	310.753	313.251	306.137
538200	149.5	314.666	314.4	313.797	312.714	310.771	313.27	306.159
538800	149.667	314.684	314.419	313.815	312.732	310.789	313.288	306.182
539400	149.833	314.703	314.438	313.834	312.751	310.806	313.306	306.205
540000	150	314.722	314.456	313.852	312.769	310.824	313.325	306.227
540600	150.167	314.74	314.475	313.87	312.787	310.842	313.343	306.249
541200	150.333	314.759	314.493	313.889	312.805	310.859	313.361	306.272
541800	150.5	314.777	314.512	313.907	312.823	310.877	313.379	306.294
542400	150.667	314.796	314.53	313.925	312.841	310.894	313.397	306.316
543000	150.833	314.814	314.548	313.943	312.859	310.912	313.415	306.337
543600	151	314.832	314.566	313.961	312.876	310.929	313.433	306.359
544200	151.167	314.851	314.585	313.979	312.894	310.946	313.451	306.381
544800	151.333	314.869	314.603	313.997	312.912	310.964	313.469	306.402
545400	151.5	314.887	314.621	314.015	312.929	310.981	313.487	306.423
546000	151.667	314.905	314.639	314.033	312.947	310.998	313.504	306.444
546600	151.833	314.923	314.657	314.051	312.965	311.015	313.522	306.466
547200	152	314.941	314.674	314.068	312.982	311.032	313.54	306.486
547800	152.167	314.959	314.692	314.086	312.999	311.049	313.557	306.507
548400	152.333	314.977	314.71	314.104	313.017	311.066	313.575	306.528
549000	152.5	314.995	314.728	314.121	313.034	311.083	313.592	306.549
549600	152.667	315.012	314.745	314.139	313.051	311.1	313.609	306.569
550200	152.833	315.03	314.763	314.156	313.069	311.116	313.627	306.589
550800	153	315.048	314.781	314.173	313.086	311.133	313.644	306.61
551400	153.167	315.065	314.798	314.191	313.103	311.15	313.661	306.63
552000	153.333	315.083	314.815	314.208	313.12	311.166	313.678	306.65
552600	153.5	315.1	314.833	314.225	313.137	311.183	313.696	306.67
553200	153.667	315.117	314.85	314.242	313.154	311.199	313.713	306.689
553800	153.833	315.135	314.867	314.26	313.171	311.216	313.73	306.709
554400	154	315.152	314.885	314.277	313.187	311.232	313.747	306.729
555000	154.167	315.169	314.902	314.294	313.204	311.249	313.764	306.748
555600	154.333	315.187	314.919	314.311	313.221	311.265	313.78	306.767
556200	154.5	315.204	314.936	314.328	313.238	311.281	313.797	306.787
556800	154.667	315.221	314.953	314.344	313.254	311.298	313.814	306.806
557400	154.833	315.238	314.97	314.361	313.271	311.314	313.831	306.825
558000	155	315.255	314.987	314.378	313.287	311.33	313.847	306.844
558600	155.167	315.272	315.004	314.395	313.304	311.346	313.864	306.863
559200	155.333	315.289	315.02	314.411	313.32	311.362	313.881	306.881
559800	155.5	315.305	315.037	314.428	313.337	311.378	313.897	306.9
560400	155.667	315.322	315.054	314.445	313.353	311.394	313.913	306.919
561000	155.833	315.339	315.071	314.461	313.369	311.41	313.93	306.937
561600	156	315.356	315.087	314.477	313.385	311.426	313.946	306.955
562200	156.167	315.372	315.104	314.494	313.402	311.441	313.963	306.974
562800	156.333	315.389	315.12	314.51	313.418	311.457	313.979	306.992
563400	156.5	315.405	315.137	314.527	313.434	311.473	313.995	307.01
564000	156.667	315.422	315.153	314.543	313.45	311.488	314.011	307.028
564600	156.833	315.438	315.169	314.559	313.466	311.504	314.027	307.046
565200	157	315.455	315.186	314.575	313.482	311.52	314.043	307.063
565800	157.167	315.471	315.202	314.591	313.498	311.535	314.059	307.081
566400	157.333	315.487	315.218	314.607	313.513	311.551	314.075	307.099
567000	157.5	315.503	315.234	314.623	313.529	311.566	314.091	307.116
567600	157.667	315.52	315.25	314.639	313.545	311.581	314.107	307.134
568200	157.833	315.536	315.266	314.655	313.561	311.597	314.123	307.151
568800	158	315.552	315.282	314.671	313.576	311.612	314.139	307.168
569400	158.167	315.568	315.298	314.687	313.592	311.627	314.154	307.185
570000	158.333	315.584	315.314	314.703	313.608	311.642	314.17	307.202
570600	158.5	315.6	315.33	314.718	313.623	311.657	314.186	307.219
571200	158.667	315.616	315.346	314.734	313.639	311.673	314.201	307.236
571800	158.833	315.632	315.362	314.75	313.654	311.688	314.217	307.253
572400	159	315.647	315.378	314.765	313.669	311.703	314.232	307.27
573000	159.167	315.663	315.393	314.781	313.685	311.718	314.248	307.287
573600	159.333	315.679	315.409	314.796	313.7	311.733	314.263	307.303
574200	159.5	315.695	315.424	314.812	313.715	311.747	314.279	307.32
574800	159.667	315.71	315.44	314.827	313.73	311.762	314.294	307.336
575400	159.833	315.726	315.456	314.843	313.746	311.777	314.309	307.353
576000	160	315.741	315.471	314.858	313.761	311.792	314.325	307.369
576600	160.167	315.757	315.486	314.873	313.776	311.806	314.34	307.385
577200	160.333	315.772	315.502	314.889	313.791	311.821	314.355	307.401
577800	160.5	315.788	315.517	314.904	313.806	311.836	314.37	307.417
578400	160.667	315.803	315.532	314.919	313.821	311.85	314.385	307.433
579000	160.833	315.818	315.548	314.934	313.836	311.865	314.4	307.449
579600	161	315.833	315.563	314.949	313.85	311.879	314.415	307.465
580200	161.167	315.849	315.578	314.964	313.865	311.894	314.43	307.481
580800	161.333	315.864	315.593	314.979	313.88	311.908	314.445	307.496
581400	161.5	315.879	315.608	314.994	313.895	311.923	314.46	307.512
582000	161.667	315.894	315.623	315.009	313.909	311.937	314.474	307.527
582600	161.833	315.909	315.638	315.024	313.924	311.951	314.489	307.543
583200	162	315.924	315.653	315.038	313.939	311.965	314.504	307.558
583800	162.167	315.939	315.668	315.053	313.953	311.98	314.519	307.574
584400	162.333	315.954	315.683	315.068	313.968	311.994	314.533	307.589
585000	162.5	315.969	315.697	315.083	313.982	312.008	314.548	307.604
585600	162.667	315.984	315.712	315.097	313.997	312.022	314.562	307.619
586200	162.833	315.998	315.727	315.112	314.011	312.036	314.577	307.634
586800	163	316.013	315.742	315.126	314.025	312.05	314.591	307.649
587400	163.167	316.028	315.756	315.141	314.04	312.064	314.606	307.664
588000	163.333	316.043	315.771	315.155	314.054	312.078	314.62	307.679
588600	163.5	316.057	315.785	315.17	314.068	312.092	314.634	307.694
589200	163.667	316.072	315.8	315.184	314.082	312.106	314.649	307.709
589800	163.833	316.086	315.814	315.199	314.096	312.12	314.663	307.723
590400	164	316.101	315.829	315.213	314.111	312.133	314.677	307.738
591000	164.167	316.115	315.843	315.227	314.125	312.147	314.691	307.752
591600	164.333	316.13	315.857	315.241	314.139	312.161	314.706	307.767
592200	164.5	316.144	315.872	315.255	314.153	312.174	314.72	307.781
592800	164.667	316.158	315.886	315.27	314.167	312.188	314.734	307.796
593400	164.833	316.173	315.9	315.284	314.181	312.202	314.748	307.81
594000	165	316.187	315.914	315.298	314.194	312.215	314.762	307.824
594600	165.167	316.201	315.929	315.312	314.208	312.229	314.776	307.838
595200	165.333	316.215	315.943	315.326	314.222	312.242	314.79	307.853
595800	165.5	316.229	315.957	315.34	314.236	312.256	314.803	307.867
596400	165.667	316.243	315.971	315.354	314.249	312.269	314.817	307.881
597000	165.833	316.258	315.985	315.368	314.263	312.282	314.831	307.895
597600	166	316.272	315.999	315.381	314.277	312.296	314.845	307.909
598200	166.167	316.286	316.013	315.395	314.29	312.309	314.859	307.922
598800	166.333	316.299	316.027	315.409	314.304	312.322	314.872	307.936
599400	166.5	316.313	316.04	315.423	314.318	312.335	314.886	307.95
600000	166.667	316.327	316.054	315.436	314.331	312.349	314.899	307.964
600600	166.833	316.341	316.068	315.45	314.344	312.362	314.913	307.977
601200	167	316.355	316.082	315.464	314.358	312.375	314.927	307.991
601800	167.167	316.369	316.095	315.477	314.371	312.388	314.94	308.004
602400	167.333	316.382	316.109	315.491	314.385	312.401	314.954	308.018
603000	167.5	316.396	316.123	315.504	314.398	312.414	314.967	308.031
603600	167.667	316.41	316.136	315.518	314.411	312.427	314.98	308.045
604200	167.833	316.423	316.15	315.531	314.424	312.44	314.994	308.058
604800	168	316.437	316.163	315.544	314.438	312.453	315.007	308.071
605400	168.167	316.45	316.177	315.558	314.451	312.466	315.02	308.085
606000	168.333	316.464	316.19	315.571	314.464	312.479	315.034	308.098
606600	168.5	316.477	316.204	315.584	314.477	312.491	315.047	308.111
607200	168.667	316.491	316.217	315.598	314.49	312.504	315.06	308.124
607800	168.833	316.504	316.23	315.611	314.503	312.517	315.073	308.137
608400	169	316.517	316.243	315.624	314.516	312.53	315.086	308.15
609000	169.167	316.531	316.257	315.637	314.529	312.542	315.099	308.163
609600	169.333	316.544	316.27	315.65	314.542	312.555	315.112	308.176
610200	169.5	316.557	316.283	315.663	314.555	312.567	315.125	308.189
610800	169.667	316.57	316.296	315.676	314.568	312.58	315.138	308.202
611400	169.833	316.584	316.309	315.689	314.581	312.593	315.151	308.214
612000	170	316.597	316.322	315.702	314.593	312.605	315.164	308.227
612600	170.167	316.61	316.335	315.715	314.606	312.617	315.177	308.24
613200	170.333	316.623	316.348	315.728	314.619	312.63	315.19	308.252
613800	170.5	316.636	316.361	315.741	314.632	312.642	315.203	308.265
614400	170.667	316.649	316.374	315.754	314.644	312.655	315.215	308.277
615000	170.833	316.662	316.387	315.767	314.657	312.667	315.228	308.29
615600	171	316.675	316.4	315.779	314.67	312.679	315.241	308.302
616200	171.167	316.688	316.413	315.792	314.682	312.692	315.253	308.315
616800	171.333	316.701	316.426	315.805	314.695	312.704	315.266	308.327
617400	171.5	316.713	316.439	315.818	314.707	312.716	315.279	308.34
618000	171.667	316.726	316.451	315.83	314.72	312.728	315.291	308.352
618600	171.833	316.739	316.464	315.843	314.732	312.74	315.304	308.364
619200	172	316.752	316.477	315.855	314.744	312.753	315.316	308.376
619800	172.167	316.764	316.489	315.868	314.757	312.765	315.329	308.389
620400	172.333	316.777	316.502	315.88	314.769	312.777	315.341	308.401
621000	172.5	316.79	316.515	315.893	314.781	312.789	315.353	308.413
621600	172.667	316.802	316.527	315.905	314.794	312.801	315.366	308.425
622200	172.833	316.815	316.54	315.918	314.806	312.813	315.378	308.437
622800	173	316.828	316.552	315.93	314.818	312.825	315.39	308.449
623400	173.167	316.84	316.565	315.942	314.83	312.836	315.403	308.461
624000	173.333	316.852	316.577	315.955	314.842	312.848	315.415	308.473
624600	173.5	316.865	316.589	315.967	314.855	312.86	315.427	308.485
625200	173.667	316.877	316.602	315.979	314.867	312.872	315.439	308.496
625800	173.833	316.89	316.614	315.991	314.879	312.884	315.452	308.508
626400	174	316.902	316.626	316.004	314.891	312.896	315.464	308.52
627000	174.167	316.914	316.639	316.016	314.903	312.907	315.476	308.532
627600	174.333	316.927	316.651	316.028	314.915	312.919	315.488	308.543
628200	174.5	316.939	316.663	316.04	314.927	312.931	315.5	308.555
628800	174.667	316.951	316.675	316.052	314.939	312.942	315.512	308.567
629400	174.833	316.963	316.687	316.064	314.95	312.954	315.524	308.578
630000	175	316.976	316.699	316.076	314.962	312.965	315.536	308.59
630600	175.167	316.988	316.711	316.088	314.974	312.977	315.548	308.601
631200	175.333	317	316.724	316.1	314.986	312.989	315.56	308.613
631800	175.5	317.012	316.736	316.112	314.998	313	315.571	308.624
632400	175.667	317.024	316.748	316.124	315.009	313.012	315.583	308.636
633000	175.833	317.036	316.759	316.136	315.021	313.023	315.595	308.647
633600	176	317.048	316.771	316.148	315.033	313.034	315.607	308.659
634200	176.167	317.06	316.783	316.159	315.044	313.046	315.619	308.67
634800	176.333	317.072	316.795	316.171	315.056	313.057	315.63	308.681
635400	176.5	317.084	316.807	316.183	315.068	313.068	315.642	308.693
636000	176.667	317.096	316.819	316.195	315.079	313.08	315.654	308.704
636600	176.833	317.107	316.831	316.206	315.091	313.091	315.665	308.715
637200	177	317.119	316.842	316.218	315.102	313.102	315.677	308.726
637800	177.167	317.131	316.854	316.23	315.114	313.114	315.688	308.737
638400	177.333	317.143	316.866	316.241	315.125	313.125	315.7	308.749
639000	177.5	317.154	316.877	316.253	315.137	313.136	315.711	308.76
639600	177.667	317.166	316.889	316.264	315.148	313.146	315.723	308.771
640200	177.833	317.178	316.901	316.276	315.159	313.157	315.734	308.782
640800	178	317.189	316.912	316.287	315.17	313.168	315.745	308.793
641400	178.167	317.201	316.924	316.298	315.181	313.178	315.757	308.803
642000	178.333	317.212	316.935	316.31	315.192	313.189	315.768	308.814
642600	178.5	317.224	316.946	316.321	315.203	313.199	315.779	308.825
643200	178.667	317.235	316.958	316.332	315.214	313.21	315.79	308.835
643800	178.833	317.247	316.969	316.343	315.225	313.22	315.801	308.846
644400	179	317.258	316.98	316.354	315.236	313.231	315.812	308.856
645000	179.167	317.269	316.991	316.365	315.246	313.241	315.822	308.867
645600	179.333	317.28	317.002	316.376	315.257	313.251	315.833	308.877
646200	179.5	317.291	317.013	316.387	315.267	313.261	315.844	308.887
646800	179.667	317.302	317.024	316.397	315.278	313.271	315.855	308.898
647400	179.833	317.313	317.035	316.408	315.288	313.281	315.865	308.908
648000	180	317.324	317.046	316.419	315.299	313.291	315.876	308.918
648600	180.167	317.335	317.056	316.429	315.309	313.301	315.886	308.928
649200	180.333	317.346	317.067	316.44	315.319	313.311	315.897	308.938
649800	180.5	317.356	317.078	316.45	315.33	313.321	315.907	308.948
650400	180.667	317.367	317.088	316.461	315.34	313.331	315.917	308.958
651000	180.833	317.377	317.099	316.471	315.35	313.34	315.928	308.967
651600	181	317.388	317.109	316.481	315.36	313.35	315.938	308.977
652200	181.167	317.399	317.12	316.492	315.37	313.36	315.948	308.987
652800	181.333	317.409	317.13	316.502	315.38	313.369	315.958	308.996
653400	181.5	317.419	317.14	316.512	315.39	313.379	315.968	309.006
654000	181.667	317.43	317.151	316.522	315.4	313.388	315.978	309.016
654600	181.833	317.44	317.161	316.532	315.409	313.397	315.988	309.025
655200	182	317.45	317.171	316.542	315.419	313.407	315.998	309.034
655800	182.167	317.46	317.181	316.552	315.429	313.416	316.008	309.044
656400	182.333	317.47	317.191	316.562	315.439	313.425	316.017	309.053
657000	182.5	317.48	317.201	316.572	315.448	313.434	316.027	309.062
657600	182.667	317.49	317.211	316.581	315.458	313.444	316.037	309.071
658200	182.833	317.5	317.221	316.591	315.467	313.453	316.046	309.08
658800	183	317.51	317.23	316.601	315.477	313.462	316.056	309.089
659400	183.167	317.52	317.24	316.61	315.486	313.471	316.065	309.098
660000	183.333	317.53	317.25	316.62	315.495	313.48	316.075	309.107
660600	183.5	317.539	317.259	316.629	315.504	313.488	316.084	309.116
661200	183.667	317.549	317.269	316.639	315.514	313.497	316.094	309.125
661800	183.833	317.559	317.279	316.648	315.523	313.506	316.103	309.134
662400	184	317.568	317.288	316.658	315.532	313.515	316.112	309.143
663000	184.167	317.578	317.297	316.667	315.541	313.523	316.121	309.151
663600	184.333	317.587	317.307	316.676	315.55	313.532	316.13	309.16
664200	184.5	317.596	317.316	316.685	315.559	313.541	316.139	309.168
664800	184.667	317.606	317.325	316.694	315.568	313.549	316.148	309.177
665400	184.833	317.615	317.335	316.703	315.577	313.558	316.157	309.185
666000	185	317.624	317.344	316.712	315.585	313.566	316.166	309.194
666600	185.167	317.633	317.353	316.721	315.594	313.574	316.175	309.202
667200	185.333	317.643	317.362	316.73	315.603	313.583	316.184	309.211
667800	185.5	317.652	317.371	316.739	315.612	313.591	316.193	309.219
668400	185.667	317.661	317.38	316.748	315.62	313.599	316.202	309.227
669000	185.833	317.67	317.389	316.757	315.629	313.607	316.21	309.235
669600	186	317.679	317.398	316.766	315.637	313.615	316.219	309.244
670200	186.167	317.687	317.406	316.774	315.646	313.624	316.227	309.252
670800	186.333	317.696	317.415	316.783	315.654	313.632	316.236	309.26
671400	186.5	317.705	317.424	316.791	315.662	313.64	316.244	309.268
672000	186.667	317.714	317.433	316.8	315.671	313.648	316.253	309.276
672600	186.833	317.722	317.441	316.808	315.679	313.655	316.261	309.284
673200	187	317.731	317.45	316.817	315.687	313.663	316.27	309.292
673800	187.167	317.74	317.458	316.825	315.695	313.671	316.278	309.299
674400	187.333	317.748	317.467	316.834	315.704	313.679	316.286	309.307
675000	187.5	317.757	317.475	316.842	315.712	313.687	316.294	309.315
675600	187.667	317.765	317.483	316.85	315.72	313.694	316.303	309.323
676200	187.833	317.774	317.492	316.858	315.728	313.702	316.311	309.331
676800	188	317.782	317.5	316.866	315.736	313.71	316.319	309.338
677400	188.167	317.79	317.508	316.875	315.744	313.717	316.327	309.346
678000	188.333	317.798	317.517	316.883	315.751	313.725	316.335	309.353
678600	188.5	317.807	317.525	316.891	315.759	313.732	316.343	309.361
679200	188.667	317.815	317.533	316.899	315.767	313.74	316.351	309.368
679800	188.833	317.823	317.541	316.907	315.775	313.747	316.358	309.376
680400	189	317.831	317.549	316.914	315.782	313.754	316.366	309.383
681000	189.167	317.839	317.557	316.922	315.79	313.761	316.374	309.391
681600	189.333	317.847	317.565	316.93	315.798	313.769	316.382	309.398
682200	189.5	317.855	317.573	316.938	315.805	313.776	316.389	309.405
682800	189.667	317.863	317.58	316.945	315.813	313.783	316.397	309.413
683400	189.833	317.871	317.588	316.953	315.82	313.79	316.404	309.42
684000	190	317.879	317.596	316.961	315.827	313.797	316.412	309.427
684600	190.167	317.886	317.604	316.968	315.835	313.804	316.419	309.434
685200	190.333	317.894	317.611	316.976	315.842	313.811	316.427	309.441
685800	190.5	317.902	317.619	316.983	315.849	313.818	316.434	309.448
686400	190.667	317.909	317.626	316.991	315.857	313.825	316.442	309.455
687000	190.833	317.917	317.634	316.998	315.864	313.832	316.449	309.463
687600	191	317.924	317.641	317.006	315.871	313.839	316.456	309.469
688200	191.167	317.932	317.649	317.013	315.878	313.846	316.463	309.476
688800	191.333	317.939	317.656	317.02	315.885	313.852	316.471	309.483
689400	191.5	317.947	317.663	317.027	315.892	313.859	316.478	309.49
690000	191.667	317.954	317.671	317.034	315.899	313.866	316.485	309.497
690600	191.833	317.961	317.678	317.042	315.906	313.872	316.492	309.504
691200	192	317.969	317.685	317.049	315.913	313.879	316.499	309.511
691800	192.167	317.976	317.692	317.056	315.92	313.886	316.506	309.518
692400	192.333	317.983	317.7	317.063	315.927	313.892	316.513	309.524
693000	192.5	317.99	317.707	317.07	315.934	313.899	316.52	309.531
693600	192.667	317.997	317.714	317.077	315.94	313.905	316.527	309.538
694200	192.833	318.004	317.721	317.084	315.947	313.911	316.533	309.544
694800	193	318.012	317.728	317.09	315.954	313.918	316.54	309.551
695400	193.167	318.019	317.735	317.097	315.96	313.924	316.547	309.557
696000	193.333	318.025	317.741	317.104	315.967	313.93	316.554	309.564
696600	193.5	318.032	317.748	317.111	315.973	313.937	316.56	309.571
697200	193.667	318.039	317.755	317.117	315.98	313.943	316.567	309.577
697800	193.833	318.046	317.762	317.124	315.986	313.949	316.574	309.584
698400	194	318.053	317.769	317.131	315.993	313.955	316.58	309.59
699000	194.167	318.06	317.775	317.137	315.999	313.961	316.587	309.596
699600	194.333	318.066	317.782	317.144	316.006	313.967	316.593	309.603
700200	194.5	318.073	317.789	317.15	316.012	313.973	316.599	309.609
700800	194.667	318.08	317.795	317.157	316.018	313.979	316.606	309.615
701400	194.833	318.086	317.802	317.163	316.025	313.985	316.612	309.622
702000	195	318.093	317.808	317.17	316.031	313.991	316.618	309.628
702600	195.167	318.099	317.815	317.176	316.037	313.997	316.625	309.634
703200	195.333	318.106	317.821	317.182	316.043	314.003	316.631	309.64
703800	195.5	318.112	317.827	317.189	316.049	314.009	316.637	309.647
704400	195.667	318.119	317.834	317.195	316.055	314.014	316.643	309.653
705000	195.833	318.125	317.84	317.201	316.061	314.02	316.649	309.659
705600	196	318.131	317.846	317.207	316.067	314.026	316.656	309.665
706200	196.167	318.138	317.853	317.213	316.073	314.031	316.662	309.671
706800	196.333	318.144	317.859	317.219	316.079	314.037	316.668	309.677
707400	196.5	318.15	317.865	317.225	316.085	314.043	316.674	309.683
708000	196.667	318.156	317.871	317.231	316.091	314.048	316.68	309.689
708600	196.833	318.162	317.877	317.237	316.097	314.054	316.685	309.695
709200	197	318.169	317.883	317.243	316.102	314.059	316.691	309.701
709800	197.167	318.175	317.889	317.249	316.108	314.065	316.697	309.707
710400	197.333	318.181	317.895	317.255	316.114	314.07	316.703	309.713
711000	197.5	318.187	317.901	317.261	316.119	314.076	316.709	309.719
711600	197.667	318.193	317.907	317.267	316.125	314.081	316.714	309.725
712200	197.833	318.199	317.913	317.273	316.131	314.086	316.72	309.731
712800	198	318.204	317.919	317.278	316.136	314.092	316.726	309.737
713400	198.167	318.21	317.925	317.284	316.142	314.097	316.731	309.742
714000	198.333	318.216	317.93	317.29	316.147	314.102	316.737	309.748
714600	198.5	318.222	317.936	317.295	316.153	314.107	316.743	309.754
715200	198.667	318.228	317.942	317.301	316.158	314.112	316.748	309.76
715800	198.833	318.233	317.947	317.306	316.164	314.117	316.754	309.766
716400	199	318.239	317.953	317.312	316.169	314.123	316.759	309.771
717000	199.167	318.245	317.959	317.317	316.174	314.128	316.765	309.777
717600	199.333	318.25	317.964	317.323	316.18	314.133	316.77	309.783
718200	199.5	318.256	317.97	317.328	316.185	314.138	316.775	309.788
718800	199.667	318.261	317.975	317.334	316.19	314.143	316.781	309.794
719400	199.833	318.267	317.981	317.339	316.195	314.147	316.786	309.799
720000	200	318.272	317.986	317.344	316.2	314.152	316.791	309.805
720600	200.167	318.278	317.991	317.35	316.206	314.157	316.796	309.811
721200	200.333	318.283	317.997	317.355	316.211	314.162	316.802	309.816
721800	200.5	318.289	318.002	317.36	316.216	314.167	316.807	309.822
722400	200.667	318.294	318.007	317.365	316.221	314.172	316.812	309.827
723000	200.833	318.299	318.013	317.37	316.226	314.176	316.817	309.833
723600	201	318.305	318.018	317.376	316.231	314.181	316.822	309.838
724200	201.167	318.31	318.023	317.381	316.236	314.186	316.827	309.844
724800	201.333	318.315	318.028	317.386	316.241	314.19	316.832	309.849
725400	201.5	318.32	318.033	317.391	316.245	314.195	316.837	309.854
726000	201.667	318.325	318.038	317.396	316.25	314.2	316.842	309.86
726600	201.833	318.331	318.044	317.401	316.255	314.204	316.847	309.865
727200	202	318.336	318.049	317.406	316.26	314.209	316.852	309.871
727800	202.167	318.341	318.054	317.411	316.265	314.213	316.857	309.876
728400	202.333	318.346	318.059	317.415	316.269	314.218	316.861	309.881
729000	202.5	318.351	318.063	317.42	316.274	314.222	316.866	309.886
729600	202.667	318.356	318.068	317.425	316.279	314.227	316.871	309.892
730200	202.833	318.361	318.073	317.43	316.283	314.231	316.876	309.897
730800	203	318.366	318.078	317.435	316.288	314.235	316.88	309.902
731400	203.167	318.37	318.083	317.439	316.293	314.24	316.885	309.908
732000	203.333	318.375	318.088	317.444	316.297	314.244	316.89	309.913
732600	203.5	318.38	318.092	317.449	316.302	314.248	316.894	309.918
733200	203.667	318.385	318.097	317.453	316.306	314.253	316.899	309.923
733800	203.833	318.39	318.102	317.458	316.311	314.257	316.903	309.928
734400	204	318.394	318.107	317.463	316.315	314.261	316.908	309.933
735000	204.167	318.399	318.111	317.467	316.319	314.265	316.912	309.939
735600	204.333	318.404	318.116	317.472	316.324	314.269	316.917	309.944
736200	204.5	318.408	318.12	317.476	316.328	314.273	316.921	309.949
736800	204.667	318.413	318.125	317.481	316.332	314.277	316.926	309.954
737400	204.833	318.418	318.129	317.485	316.337	314.281	316.93	309.959
738000	205	318.422	318.134	317.489	316.341	314.285	316.934	309.964
738600	205.167	318.427	318.138	317.494	316.345	314.289	316.939	309.969
739200	205.333	318.431	318.143	317.498	316.349	314.293	316.943	309.974
739800	205.5	318.436	318.147	317.502	316.354	314.297	316.947	309.979
740400	205.667	318.44	318.152	317.507	316.358	314.301	316.952	309.984
741000	205.833	318.444	318.156	317.511	316.362	314.305	316.956	309.989
741600	206	318.449	318.16	317.515	316.366	314.309	316.96	309.994
742200	206.167	318.453	318.165	317.519	316.37	314.313	316.964	309.999
742800	206.333	318.457	318.169	317.524	316.374	314.317	316.968	310.004
743400	206.5	318.462	318.173	317.528	316.378	314.32	316.972	310.009
744000	206.667	318.466	318.177	317.532	316.382	314.324	316.976	310.014
744600	206.833	318.47	318.182	317.536	316.386	314.328	316.98	310.019
745200	207	318.474	318.186	317.54	316.39	314.332	316.984	310.024
745800	207.167	318.479	318.19	317.544	316.394	314.335	316.988	310.029
746400	207.333	318.483	318.194	317.548	316.398	314.339	316.992	310.033
747000	207.5	318.487	318.198	317.552	316.402	314.343	316.996	310.038
747600	207.667	318.491	318.202	317.556	316.405	314.346	317	310.043
748200	207.833	318.495	318.206	317.56	316.409	314.35	317.004	310.048
748800	208	318.499	318.21	317.564	316.413	314.353	317.008	310.053
749400	208.167	318.503	318.214	317.568	316.417	314.357	317.012	310.058
750000	208.333	318.507	318.218	317.572	316.421	314.36	317.016	310.062
750600	208.5	318.511	318.222	317.576	316.424	314.364	317.019	310.067
751200	208.667	318.515	318.226	317.579	316.428	314.367	317.023	310.072
751800	208.833	318.519	318.23	317.583	316.432	314.371	317.027	310.077
752400	209	318.523	318.234	317.587	316.435	314.374	317.031	310.081
753000	209.167	318.527	318.237	317.591	316.439	314.378	317.034	310.086
753600	209.333	318.531	318.241	317.594	316.442	314.381	317.038	310.091
754200	209.5	318.534	318.245	317.598	316.446	314.384	317.042	310.096
754800	209.667	318.538	318.249	317.602	316.449	314.388	317.045	310.1
755400	209.833	318.542	318.252	317.605	316.453	314.391	317.049	310.105
756000	210	318.546	318.256	317.609	316.456	314.394	317.052	310.11
756600	210.167	318.549	318.26	317.613	316.46	314.397	317.056	310.114
757200	210.333	318.553	318.263	317.616	316.463	314.401	317.059	310.119
757800	210.5	318.557	318.267	317.62	316.467	314.404	317.063	310.124
758400	210.667	318.56	318.271	317.623	316.47	314.407	317.066	310.128
759000	210.833	318.564	318.274	317.627	316.473	314.41	317.07	310.133
759600	211	318.568	318.278	317.63	316.477	314.413	317.073	310.138
760200	211.167	318.571	318.281	317.633	316.48	314.416	317.076	310.142
760800	211.333	318.575	318.285	317.637	316.483	314.419	317.08	310.147
761400	211.5	318.578	318.288	317.64	316.487	314.422	317.083	310.151
762000	211.667	318.582	318.292	317.644	316.49	314.425	317.086	310.156
762600	211.833	318.585	318.295	317.647	316.493	314.428	317.09	310.16
763200	212	318.589	318.298	317.65	316.496	314.431	317.093	310.165
763800	212.167	318.592	318.302	317.654	316.499	314.434	317.096	310.169
764400	212.333	318.595	318.305	317.657	316.503	314.437	317.1	310.174
765000	212.5	318.599	318.308	317.66	316.506	314.44	317.103	310.179
765600	212.667	318.602	318.312	317.663	316.509	314.443	317.106	310.183
766200	212.833	318.606	318.315	317.667	316.512	314.446	317.109	310.188
766800	213	318.609	318.318	317.67	316.515	314.448	317.112	310.192
767400	213.167	318.612	318.321	317.673	316.518	314.451	317.115	310.196
768000	213.333	318.615	318.325	317.676	316.521	314.453	317.118	310.2
768600	213.5	318.618	318.328	317.679	316.523	314.456	317.121	310.204
769200	213.667	318.621	318.331	317.682	316.526	314.458	317.124	310.208
769800	213.833	318.624	318.334	317.684	316.529	314.46	317.126	310.212
770400	214	318.627	318.337	317.687	316.531	314.462	317.129	310.216
771000	214.167	318.63	318.339	317.69	316.534	314.465	317.132	310.22
771600	214.333	318.633	318.342	317.692	316.536	314.467	317.134	310.223
772200	214.5	318.636	318.345	317.695	316.538	314.469	317.137	310.227
772800	214.667	318.639	318.347	317.698	316.541	314.47	317.139	310.23
773400	214.833	318.641	318.35	317.7	316.543	314.472	317.141	310.234
774000	215	318.644	318.352	317.702	316.545	314.474	317.144	310.237
774600	215.167	318.646	318.355	317.705	316.547	314.476	317.146	310.24
775200	215.333	318.649	318.357	317.707	316.549	314.478	317.148	310.243
775800	215.5	318.651	318.36	317.709	316.551	314.479	317.15	310.246
776400	215.667	318.653	318.362	317.711	316.553	314.481	317.152	310.249
777000	215.833	318.656	318.364	317.713	316.555	314.482	317.154	310.252
777600	216	318.658	318.366	317.715	316.557	314.484	317.156	310.254
778200	216.167	318.66	318.368	317.717	316.558	314.485	317.158	310.257
778800	216.333	318.662	318.37	317.719	316.56	314.486	317.16	310.26
779400	216.5	318.664	318.372	317.721	316.562	314.488	317.161	310.262
780000	216.667	318.666	318.374	317.723	316.563	314.489	317.163	310.264
780600	216.833	318.668	318.376	317.724	316.565	314.49	317.165	310.267
781200	217	318.67	318.378	317.726	316.566	314.491	317.166	310.269
781800	217.167	318.671	318.379	317.728	316.568	314.492	317.168	310.271
782400	217.333	318.673	318.381	317.729	316.569	314.493	317.169	310.273
783000	217.5	318.675	318.383	317.731	316.57	314.494	317.17	310.275
783600	217.667	318.676	318.384	317.732	316.571	314.495	317.172	310.277
784200	217.833	318.678	318.386	317.733	316.573	314.496	317.173	310.279
784800	218	318.679	318.387	317.735	316.574	314.497	317.174	310.281
785400	218.167	318.681	318.388	317.736	316.575	314.497	317.175	310.282
786000	218.333	318.682	318.39	317.737	316.576	314.498	317.176	310.284
786600	218.5	318.683	318.391	317.738	316.577	314.499	317.177	310.285
787200	218.667	318.685	318.392	317.739	316.577	314.499	317.178	310.287
787800	218.833	318.686	318.393	317.74	316.578	314.5	317.179	310.288
788400	219	318.687	318.394	317.741	316.579	314.5	317.18	310.29
789000	219.167	318.688	318.395	317.742	316.58	314.5	317.181	310.291
789600	219.333	318.689	318.396	317.743	316.58	314.501	317.182	310.292
790200	219.5	318.69	318.397	317.744	316.581	314.501	317.183	310.293
790800	219.667	318.691	318.398	317.744	316.582	314.501	317.183	310.294
791400	219.833	318.692	318.399	317.745	316.582	314.502	317.184	310.295
792000	220	318.692	318.399	317.746	316.583	314.502	317.184	310.296
792600	220.167	318.693	318.4	317.746	316.583	314.502	317.185	310.297
793200	220.333	318.694	318.401	317.747	316.583	314.502	317.185	310.298
793800	220.5	318.694	318.401	317.747	316.584	314.502	317.186	310.298
794400	220.667	318.695	318.402	317.748	316.584	314.502	317.186	310.299
795000	220.833	318.696	318.402	317.748	316.584	314.502	317.186	310.3
795600	221	318.696	318.403	317.748	316.584	314.501	317.187	310.3
796200	221.167	318.696	318.403	317.749	316.584	314.501	317.187	310.301
796800	221.333	318.697	318.403	317.749	316.584	314.501	317.187	310.301
797400	221.5	318.697	318.404	317.749	316.584	314.501	317.187	310.301
798000	221.667	318.697	318.404	317.749	316.584	314.5	317.187	310.302
798600	221.833	318.698	318.404	317.749	316.584	314.5	317.187	310.302
799200	222	318.698	318.404	317.749	316.584	314.499	317.187	310.302
799800	222.167	318.698	318.404	317.749	316.584	314.499	317.187	310.302
800400	222.333	318.698	318.404	317.749	316.583	314.498	317.187	310.302
801000	222.5	318.698	318.404	317.749	316.583	314.498	317.186	310.302
801600	222.667	318.698	318.404	317.749	316.583	314.497	317.186	310.302
802200	222.833	318.698	318.404	317.748	316.582	314.496	317.186	310.302
802800	223	318.698	318.404	317.748	316.582	314.496	317.185	310.302
803400	223.167	318.697	318.403	317.748	316.581	314.495	317.185	310.301
804000	223.333	318.697	318.403	317.747	316.581	314.494	317.184	310.301
804600	223.5	318.697	318.403	317.747	316.58	314.493	317.184	310.301
805200	223.667	318.696	318.402	317.746	316.579	314.492	317.183	310.3
805800	223.833	318.696	318.402	317.746	316.579	314.491	317.183	310.3
806400	224	318.696	318.401	317.745	316.578	314.49	317.182	310.299
807000	224.167	318.695	318.401	317.745	316.577	314.489	317.181	310.299
807600	224.333	318.695	318.4	317.744	316.576	314.488	317.181	310.298
808200	224.5	318.694	318.4	317.743	316.575	314.487	317.18	310.298
808800	224.667	318.693	318.399	317.742	316.574	314.486	317.179	310.297
809400	224.833	318.693	318.398	317.742	316.573	314.484	317.178	310.296
810000	225	318.692	318.397	317.741	316.572	314.483	317.177	310.295
810600	225.167	318.691	318.396	317.74	316.571	314.482	317.176	310.294
811200	225.333	318.69	318.396	317.739	316.57	314.48	317.175	310.293
811800	225.5	318.689	318.395	317.738	316.569	314.479	317.174	310.292
812400	225.667	318.688	318.394	317.737	316.568	314.477	317.173	310.291
813000	225.833	318.688	318.393	317.736	316.567	314.476	317.172	310.29
813600	226	318.686	318.392	317.734	316.565	314.474	317.17	310.289
814200	226.167	318.685	318.391	317.733	316.564	314.473	317.169	310.288
814800	226.333	318.684	318.389	317.732	316.562	314.471	317.168	310.287
815400	226.5	318.683	318.388	317.731	316.561	314.469	317.166	310.286
816000	226.667	318.682	318.387	317.729	316.56	314.468	317.165	310.284
816600	226.833	318.681	318.386	317.728	316.558	314.466	317.164	310.283
817200	227	318.679	318.384	317.727	316.556	314.464	317.162	310.282
817800	227.167	318.678	318.383	317.725	316.555	314.462	317.161	310.28
818400	227.333	318.677	318.381	317.724	316.553	314.46	317.159	310.279
819000	227.5	318.675	318.38	317.722	316.552	314.458	317.157	310.277
819600	227.667	318.674	318.378	317.72	316.55	314.456	317.156	310.276
820200	227.833	318.672	318.377	317.719	316.548	314.454	317.154	310.274
820800	228	318.671	318.375	317.717	316.546	314.452	317.152	310.272
821400	228.167	318.669	318.374	317.715	316.544	314.45	317.151	310.271
822000	228.333	318.668	318.372	317.714	316.542	314.448	317.149	310.269
822600	228.5	318.666	318.37	317.712	316.54	314.446	317.147	310.267
823200	228.667	318.664	318.369	317.71	316.538	314.444	317.145	310.266
823800	228.833	318.662	318.367	317.708	316.536	314.441	317.143	310.264
824400	229	318.661	318.365	317.706	316.534	314.439	317.141	310.262
825000	229.167	318.659	318.363	317.704	316.532	314.437	317.139	310.26
825600	229.333	318.657	318.361	317.702	316.53	314.434	317.137	310.258
826200	229.5	318.655	318.359	317.7	316.528	314.432	317.135	310.256
826800	229.667	318.653	318.357	317.698	316.526	314.429	317.133	310.254
827400	229.833	318.651	318.355	317.696	316.523	314.427	317.13	310.252
828000	230	318.649	318.353	317.694	316.521	314.424	317.128	310.25
828600	230.167	318.647	318.351	317.691	316.519	314.422	317.126	310.248
829200	230.333	318.645	318.349	317.689	316.516	314.419	317.124	310.245
829800	230.5	318.642	318.346	317.687	316.514	314.416	317.121	310.243
830400	230.667	318.64	318.344	317.684	316.511	314.414	317.119	310.241
831000	230.833	318.638	318.342	317.682	316.509	314.411	317.116	310.239
831600	231	318.636	318.339	317.68	316.506	314.408	317.114	310.236
832200	231.167	318.633	318.337	317.677	316.504	314.405	317.111	310.234
832800	231.333	318.631	318.335	317.675	316.501	314.403	317.109	310.232
833400	231.5	318.628	318.332	317.672	316.498	314.4	317.106	310.229
834000	231.667	318.626	318.33	317.67	316.496	314.397	317.104	310.227
834600	231.833	318.624	318.327	317.667	316.493	314.394	317.101	310.224
835200	232	318.621	318.325	317.664	316.49	314.391	317.098	310.222
835800	232.167	318.618	318.322	317.662	316.487	314.388	317.095	310.219
836400	232.333	318.616	318.319	317.659	316.485	314.385	317.093	310.217
837000	232.5	318.613	318.317	317.656	316.482	314.382	317.09	310.214
837600	232.667	318.61	318.314	317.653	316.479	314.379	317.087	310.211
838200	232.833	318.608	318.311	317.651	316.476	314.375	317.084	310.209
838800	233	318.605	318.308	317.648	316.473	314.372	317.081	310.206
839400	233.167	318.602	318.305	317.645	316.47	314.369	317.078	310.203
840000	233.333	318.599	318.303	317.642	316.467	314.366	317.075	310.2
840600	233.5	318.596	318.3	317.639	316.464	314.362	317.072	310.198
841200	233.667	318.594	318.297	317.636	316.46	314.359	317.069	310.195
841800	233.833	318.591	318.294	317.633	316.457	314.356	317.066	310.192
842400	234	318.588	318.291	317.63	316.454	314.352	317.063	310.189
843000	234.167	318.585	318.288	317.626	316.451	314.349	317.06	310.186
843600	234.333	318.581	318.284	317.623	316.447	314.345	317.056	310.183
844200	234.5	318.578	318.281	317.62	316.444	314.342	317.053	310.18
844800	234.667	318.575	318.278	317.617	316.441	314.338	317.05	310.177
845400	234.833	318.572	318.275	317.614	316.437	314.335	317.047	310.174
846000	235	318.569	318.272	317.61	316.434	314.331	317.043	310.171
846600	235.167	318.566	318.268	317.607	316.431	314.327	317.04	310.168
847200	235.333	318.562	318.265	317.604	316.427	314.324	317.036	310.165
847800	235.5	318.559	318.262	317.6	316.423	314.32	317.033	310.162
848400	235.667	318.556	318.258	317.597	316.42	314.316	317.029	310.158
849000	235.833	318.552	318.255	317.593	316.416	314.312	317.026	310.155
849600	236	318.549	318.252	317.59	316.413	314.309	317.022	310.152
850200	236.167	318.545	318.248	317.586	316.409	314.305	317.019	310.149
850800	236.333	318.542	318.245	317.583	316.405	314.301	317.015	310.146
851400	236.5	318.538	318.241	317.579	316.402	314.297	317.011	310.142
852000	236.667	318.535	318.237	317.575	316.398	314.293	317.008	310.139
852600	236.833	318.531	318.234	317.572	316.394	314.289	317.004	310.136
853200	237	318.528	318.23	317.568	316.39	314.285	317	310.132
853800	237.167	318.524	318.226	317.564	316.386	314.281	316.996	310.129
854400	237.333	318.52	318.223	317.56	316.383	314.277	316.993	310.125
855000	237.5	318.517	318.219	317.556	316.379	314.273	316.989	310.122
855600	237.667	318.513	318.215	317.553	316.375	314.269	316.985	310.118
856200	237.833	318.509	318.211	317.549	316.371	314.265	316.981	310.115
856800	238	318.505	318.208	317.545	316.367	314.26	316.977	310.111
857400	238.167	318.501	318.204	317.541	316.363	314.256	316.973	310.108
858000	238.333	318.498	318.2	317.537	316.358	314.252	316.969	310.104
858600	238.5	318.494	318.196	317.533	316.354	314.248	316.965	310.101
859200	238.667	318.49	318.192	317.529	316.35	314.243	316.961	310.097
859800	238.833	318.486	318.188	317.525	316.346	314.239	316.957	310.094
860400	239	318.482	318.184	317.521	316.342	314.235	316.953	310.09
861000	239.167	318.478	318.18	317.517	316.338	314.23	316.948	310.086
861600	239.333	318.474	318.176	317.512	316.333	314.226	316.944	310.083
862200	239.5	318.47	318.171	317.508	316.329	314.221	316.94	310.079
862800	239.667	318.465	318.167	317.504	316.325	314.217	316.936	310.075
863400	239.833	318.461	318.163	317.5	316.32	314.212	316.931	310.071
864000	240	318.457	318.159	317.495	316.316	314.208	316.927	310.068
864600	240.167	318.453	318.155	317.491	316.312	314.203	316.923	310.064
865200	240.333	318.449	318.15	317.487	316.307	314.199	316.918	310.06
865800	240.5	318.444	318.146	317.482	316.303	314.194	316.914	310.056
866400	240.667	318.44	318.142	317.478	316.298	314.189	316.909	310.052
867000	240.833	318.436	318.137	317.474	316.294	314.185	316.905	310.048
867600	241	318.431	318.133	317.469	316.289	314.18	316.9	310.044
868200	241.167	318.427	318.128	317.465	316.284	314.175	316.896	310.041
868800	241.333	318.422	318.124	317.46	316.28	314.17	316.891	310.037
869400	241.5	318.418	318.119	317.455	316.275	314.166	316.887	310.033
870000	241.667	318.413	318.115	317.451	316.271	314.161	316.882	310.029
870600	241.833	318.409	318.11	317.446	316.266	314.156	316.877	310.025
871200	242	318.404	318.106	317.442	316.261	314.151	316.873	310.021
871800	242.167	318.4	318.101	317.437	316.256	314.146	316.868	310.017
872400	242.333	318.395	318.097	317.432	316.252	314.141	316.863	310.013
873000	242.5	318.391	318.092	317.428	316.247	314.136	316.859	310.009
873600	242.667	318.386	318.087	317.423	316.242	314.131	316.854	310.005
874200	242.833	318.381	318.082	317.418	316.237	314.126	316.849	310
874800	243	318.376	318.078	317.413	316.232	314.121	316.844	309.996
875400	243.167	318.372	318.073	317.408	316.227	314.116	316.839	309.992
876000	243.333	318.367	318.068	317.403	316.222	314.111	316.834	309.988
876600	243.5	318.362	318.063	317.399	316.217	314.106	316.829	309.984
877200	243.667	318.357	318.058	317.394	316.212	314.101	316.824	309.98
877800	243.833	318.352	318.053	317.389	316.207	314.096	316.819	309.976
878400	244	318.348	318.049	317.384	316.202	314.09	316.814	309.971
879000	244.167	318.343	318.044	317.379	316.197	314.085	316.809	309.967
879600	244.333	318.338	318.039	317.374	316.192	314.08	316.804	309.963
880200	244.5	318.333	318.034	317.369	316.187	314.075	316.799	309.959
880800	244.667	318.328	318.029	317.364	316.182	314.069	316.794	309.954
881400	244.833	318.323	318.024	317.358	316.176	314.064	316.789	309.95
882000	245	318.318	318.018	317.353	316.171	314.059	316.784	309.946
882600	245.167	318.313	318.013	317.348	316.166	314.053	316.779	309.941
883200	245.333	318.307	318.008	317.343	316.161	314.048	316.773	309.937
883800	245.5	318.302	318.003	317.338	316.155	314.042	316.768	309.933
884400	245.667	318.297	317.998	317.333	316.15	314.037	316.763	309.928
885000	245.833	318.292	317.993	317.327	316.145	314.032	316.758	309.924
885600	246	318.287	317.987	317.322	316.139	314.026	316.752	309.92
886200	246.167	318.281	317.982	317.317	316.134	314.021	316.747	309.915
886800	246.333	318.276	317.977	317.311	316.129	314.015	316.742	309.911
887400	246.5	318.271	317.971	317.306	316.123	314.009	316.736	309.906
888000	246.667	318.266	317.966	317.301	316.118	314.004	316.731	309.902
888600	246.833	318.26	317.961	317.295	316.112	313.998	316.725	309.897
889200	247	318.255	317.955	317.29	316.107	313.993	316.72	309.893
889800	247.167	318.25	317.95	317.284	316.101	313.987	316.714	309.888
890400	247.333	318.244	317.945	317.279	316.096	313.981	316.709	309.884
891000	247.5	318.239	317.939	317.273	316.09	313.975	316.703	309.879
891600	247.667	318.233	317.934	317.268	316.084	313.97	316.698	309.875
892200	247.833	318.228	317.928	317.262	316.079	313.964	316.692	309.87
892800	248	318.222	317.923	317.257	316.073	313.958	316.686	309.866
893400	248.167	318.217	317.917	317.251	316.067	313.952	316.681	309.861
894000	248.333	318.211	317.911	317.245	316.062	313.946	316.675	309.857
894600	248.5	318.205	317.906	317.24	316.056	313.94	316.669	309.852
895200	248.667	318.2	317.9	317.234	316.05	313.934	316.663	309.848
895800	248.833	318.194	317.894	317.228	316.044	313.928	316.658	309.844
896400	249	318.188	317.888	317.222	316.038	313.921	316.652	309.84
897000	249.167	318.183	317.883	317.216	316.032	313.915	316.646	309.836
897600	249.333	318.177	317.877	317.21	316.025	313.909	316.639	309.832
898200	249.5	318.171	317.871	317.204	316.019	313.902	316.633	309.828
898800	249.667	318.165	317.865	317.198	316.013	313.896	316.627	309.824
899400	249.833	318.159	317.859	317.192	316.007	313.889	316.621	309.82
900000	250	318.153	317.852	317.185	316	313.882	316.615	309.816
900600	250.167	318.146	317.846	317.179	315.994	313.876	316.608	309.812
901200	250.333	318.14	317.84	317.173	315.987	313.869	316.602	309.809
901800	250.5	318.134	317.833	317.166	315.981	313.862	316.595	309.805
902400	250.667	318.127	317.827	317.16	315.974	313.855	316.589	309.802
903000	250.833	318.121	317.821	317.153	315.967	313.848	316.582	309.798
903600	251	318.114	317.814	317.147	315.961	313.841	316.575	309.795
904200	251.167	318.108	317.808	317.14	315.954	313.834	316.569	309.791
904800	251.333	318.101	317.801	317.133	315.947	313.827	316.562	309.788
905400	251.5	318.095	317.794	317.126	315.94	313.82	316.555	309.785
906000	251.667	318.088	317.787	317.12	315.933	313.813	316.548	309.782
906600	251.833	318.081	317.781	317.113	315.926	313.805	316.541	309.778
907200	252	318.074	317.774	317.106	315.919	313.798	316.534	309.775
907800	252.167	318.067	317.767	317.099	315.912	313.791	316.527	309.772
908400	252.333	318.061	317.76	317.092	315.904	313.783	316.52	309.769
909000	252.5	318.054	317.753	317.085	315.897	313.776	316.513	309.766
909600	252.667	318.046	317.746	317.077	315.89	313.768	316.505	309.763
910200	252.833	318.039	317.739	317.07	315.883	313.76	316.498	309.761
910800	253	318.032	317.731	317.063	315.875	313.753	316.491	309.758
911400	253.167	318.025	317.724	317.056	315.868	313.745	316.483	309.755
912000	253.333	318.018	317.717	317.048	315.86	313.737	316.476	309.752
912600	253.5	318.01	317.709	317.041	315.853	313.73	316.468	309.75
913200	253.667	318.003	317.702	317.033	315.845	313.722	316.461	309.747
913800	253.833	317.995	317.694	317.026	315.837	313.714	316.453	309.745
914400	254	317.988	317.687	317.018	315.829	313.706	316.446	309.742
915000	254.167	317.98	317.679	317.01	315.822	313.698	316.438	309.74
915600	254.333	317.973	317.672	317.003	315.814	313.69	316.43	309.738
916200	254.5	317.965	317.664	316.995	315.806	313.682	316.422	309.735
916800	254.667	317.957	317.656	316.987	315.798	313.673	316.414	309.733
917400	254.833	317.95	317.648	316.979	315.79	313.665	316.406	309.731
918000	255	317.942	317.641	316.971	315.782	313.657	316.398	309.728
918600	255.167	317.934	317.633	316.963	315.774	313.649	316.39	309.726
919200	255.333	317.926	317.625	316.955	315.766	313.64	316.382	309.724
919800	255.5	317.918	317.617	316.947	315.757	313.632	316.374	309.722
920400	255.667	317.91	317.609	316.939	315.749	313.623	316.366	309.72
921000	255.833	317.902	317.6	316.931	315.741	313.615	316.358	309.718
921600	256	317.894	317.592	316.923	315.733	313.606	316.349	309.716
922200	256.167	317.886	317.584	316.914	315.724	313.598	316.341	309.714
922800	256.333	317.877	317.576	316.906	315.716	313.589	316.333	309.713
923400	256.5	317.869	317.567	316.898	315.707	313.58	316.324	309.711
924000	256.667	317.861	317.559	316.889	315.699	313.572	316.316	309.709
924600	256.833	317.852	317.551	316.881	315.69	313.563	316.307	309.707
925200	257	317.844	317.542	316.872	315.681	313.554	316.299	309.706
925800	257.167	317.835	317.534	316.863	315.673	313.545	316.29	309.704
926400	257.333	317.827	317.525	316.855	315.664	313.536	316.281	309.702
927000	257.5	317.818	317.517	316.846	315.655	313.527	316.273	309.701
927600	257.667	317.81	317.508	316.837	315.646	313.518	316.264	309.699
928200	257.833	317.801	317.499	316.829	315.637	313.509	316.255	309.698
928800	258	317.792	317.49	316.82	315.628	313.5	316.246	309.696
929400	258.167	317.784	317.482	316.811	315.619	313.491	316.237	309.695
930000	258.333	317.775	317.473	316.802	315.61	313.482	316.228	309.694
930600	258.5	317.766	317.464	316.793	315.601	313.472	316.219	309.692
931200	258.667	317.757	317.455	316.784	315.592	313.463	316.21	309.691
931800	258.833	317.748	317.446	316.775	315.583	313.454	316.201	309.69
932400	259	317.739	317.437	316.766	315.574	313.444	316.192	309.689
933000	259.167	317.73	317.428	316.757	315.565	313.435	316.183	309.687
933600	259.333	317.721	317.419	316.747	315.555	313.425	316.173	309.686
934200	259.5	317.712	317.409	316.738	315.546	313.416	316.164	309.685
934800	259.667	317.702	317.4	316.729	315.537	313.406	316.155	309.684
935400	259.833	317.693	317.391	316.72	315.527	313.397	316.145	309.683
936000	260	317.684	317.382	316.71	315.518	313.387	316.136	309.682
936600	260.167	317.674	317.372	316.701	315.508	313.377	316.127	309.681
937200	260.333	317.665	317.363	316.691	315.499	313.368	316.117	309.68
937800	260.5	317.656	317.353	316.682	315.489	313.358	316.107	309.679
938400	260.667	317.646	317.344	316.672	315.479	313.348	316.098	309.678
939000	260.833	317.637	317.334	316.663	315.47	313.338	316.088	309.678
939600	261	317.627	317.325	316.653	315.46	313.328	316.079	309.677
940200	261.167	317.617	317.315	316.643	315.45	313.318	316.069	309.676
940800	261.333	317.608	317.305	316.634	315.44	313.308	316.059	309.675
941400	261.5	317.598	317.296	316.624	315.43	313.298	316.049	309.675
942000	261.667	317.588	317.286	316.614	315.42	313.288	316.039	309.674
942600	261.833	317.579	317.276	316.604	315.41	313.278	316.029	309.673
943200	262	317.569	317.266	316.594	315.4	313.268	316.019	309.673
943800	262.167	317.559	317.256	316.584	315.39	313.258	316.009	309.672
944400	262.333	317.549	317.246	316.574	315.38	313.248	315.999	309.671
945000	262.5	317.539	317.236	316.564	315.37	313.237	315.989	309.671
945600	262.667	317.529	317.226	316.554	315.36	313.227	315.979	309.67
946200	262.833	317.519	317.216	316.544	315.35	313.217	315.969	309.67
946800	263	317.509	317.206	316.534	315.339	313.206	315.959	309.67
947400	263.167	317.499	317.196	316.524	315.329	313.196	315.949	309.669
948000	263.333	317.489	317.186	316.513	315.319	313.185	315.938	309.669
948600	263.5	317.478	317.175	316.503	315.308	313.175	315.928	309.668
949200	263.667	317.468	317.165	316.493	315.298	313.164	315.918	309.668
949800	263.833	317.458	317.155	316.482	315.288	313.154	315.907	309.668
950400	264	317.447	317.144	316.472	315.277	313.143	315.897	309.667
951000	264.167	317.437	317.134	316.461	315.267	313.132	315.886	309.667
951600	264.333	317.427	317.124	316.451	315.256	313.122	315.876	309.667
952200	264.5	317.416	317.113	316.44	315.245	313.111	315.865	309.667
952800	264.667	317.406	317.103	316.43	315.235	313.1	315.855	309.667
953400	264.833	317.395	317.092	316.419	315.224	313.089	315.844	309.666
954000	265	317.385	317.081	316.409	315.213	313.078	315.833	309.666
954600	265.167	317.374	317.071	316.398	315.203	313.067	315.823	309.666
955200	265.333	317.363	317.06	316.387	315.192	313.057	315.812	309.666
955800	265.5	317.353	317.049	316.376	315.181	313.046	315.801	309.666
956400	265.667	317.342	317.039	316.366	315.17	313.035	315.79	309.666
957000	265.833	317.331	317.028	316.355	315.159	313.024	315.779	309.666
957600	266	317.32	317.017	316.344	315.148	313.012	315.768	309.666
958200	266.167	317.309	317.006	316.333	315.137	313.001	315.757	309.666
958800	266.333	317.298	316.995	316.322	315.126	312.99	315.746	309.666
959400	266.5	317.287	316.984	316.311	315.115	312.979	315.735	309.666
960000	266.667	317.277	316.973	316.3	315.104	312.968	315.724	309.667
960600	266.833	317.265	316.962	316.289	315.093	312.956	315.713	309.667
961200	267	317.254	316.951	316.278	315.082	312.945	315.702	309.667
961800	267.167	317.243	316.94	316.267	315.07	312.934	315.691	309.667
962400	267.333	317.232	316.929	316.255	315.059	312.922	315.68	309.667
963000	267.5	317.221	316.918	316.244	315.048	312.911	315.668	309.667
963600	267.667	317.21	316.906	316.233	315.036	312.9	315.657	309.668
964200	267.833	317.199	316.895	316.222	315.025	312.888	315.646	309.668
964800	268	317.187	316.884	316.21	315.014	312.877	315.634	309.668
965400	268.167	317.176	316.873	316.199	315.002	312.865	315.623	309.669
966000	268.333	317.165	316.861	316.187	314.991	312.853	315.612	309.669
966600	268.5	317.153	316.85	316.176	314.979	312.842	315.6	309.669
967200	268.667	317.142	316.838	316.165	314.968	312.83	315.589	309.67
967800	268.833	317.13	316.827	316.153	314.956	312.819	315.577	309.67
968400	269	317.119	316.815	316.141	314.945	312.807	315.565	309.67
969000	269.167	317.107	316.804	316.13	314.933	312.795	315.554	309.671
969600	269.333	317.096	316.792	316.118	314.921	312.783	315.542	309.671
970200	269.5	317.084	316.781	316.107	314.909	312.771	315.53	309.672
[truncated: 2,637 more rows]

## Sheet: Figure10
Time, s	Time,hr	Lid + RHU	Only RHU	Only Lid				MAX	min	del T
[truncated: 4,255 more rows]

[truncated: 1 more sheets: Figure11]
